# Supplementary material for: FCMDAP: using miRNA family and cluster information to improve the prediction accuracy of disease related miRNAs
Source: BMC Syst Biol. 2019 Apr 5;13(Suppl 2):26. doi: 10.1186/s12918-019-0696-9 (PMC6449885; doi:10.1186/s12918-019-0696-9)
Supplement: Supplementary file 1 — Known miRNA-disease associations. (XLSX 146 kb) [file 12918_2019_696_MOESM1_ESM.xlsx]

## Sheet: miRNA_disease_asso
rank	miRNA	disease	di_num
1	hsa-mir-125a	Abortion, Habitual	3
2	hsa-mir-196a	Abortion, Habitual	3
3	hsa-mir-499a	Abortion, Habitual	3
4	hsa-mir-198	Acquired Immunodeficiency Syndrome	4
5	hsa-mir-29a	Acquired Immunodeficiency Syndrome	4
6	hsa-mir-29b	Acquired Immunodeficiency Syndrome	4
7	hsa-let-7a	ACTH-Secreting Pituitary Adenoma	1
8	hsa-mir-141	ACTH-Secreting Pituitary Adenoma	1
9	hsa-mir-143	ACTH-Secreting Pituitary Adenoma	1
10	hsa-mir-145	ACTH-Secreting Pituitary Adenoma	1
11	hsa-mir-150	ACTH-Secreting Pituitary Adenoma	1
12	hsa-mir-15a	ACTH-Secreting Pituitary Adenoma	1
13	hsa-mir-16	ACTH-Secreting Pituitary Adenoma	1
14	hsa-mir-21	ACTH-Secreting Pituitary Adenoma	1
15	hsa-mir-1	Acute Coronary Syndrome	5
16	hsa-mir-133a	Acute Coronary Syndrome	5
17	hsa-mir-133b	Acute Coronary Syndrome	5
18	hsa-mir-146a	Acute Coronary Syndrome	5
19	hsa-mir-155	Acute Coronary Syndrome	5
20	hsa-mir-208b	Acute Coronary Syndrome	5
21	hsa-mir-210	Acute Kidney Injury	6
22	hsa-mir-16	Acute Lung Injury	7
23	hsa-let-7a	Adenocarcinoma	8
24	hsa-mir-103a	Adenocarcinoma	8
25	hsa-mir-106a	Adenocarcinoma	8
26	hsa-mir-10b	Adenocarcinoma	8
27	hsa-mir-126	Adenocarcinoma	8
28	hsa-mir-133a	Adenocarcinoma	8
29	hsa-mir-135a	Adenocarcinoma	8
30	hsa-mir-143	Adenocarcinoma	8
31	hsa-mir-145	Adenocarcinoma	8
32	hsa-mir-151a	Adenocarcinoma	8
33	hsa-mir-152	Adenocarcinoma	8
34	hsa-mir-155	Adenocarcinoma	8
35	hsa-mir-16	Adenocarcinoma	8
36	hsa-mir-17	Adenocarcinoma	8
37	hsa-mir-181b	Adenocarcinoma	8
38	hsa-mir-182	Adenocarcinoma	8
39	hsa-mir-183	Adenocarcinoma	8
40	hsa-mir-191	Adenocarcinoma	8
41	hsa-mir-192	Adenocarcinoma	8
42	hsa-mir-193b	Adenocarcinoma	8
43	hsa-mir-194	Adenocarcinoma	8
44	hsa-mir-195	Adenocarcinoma	8
45	hsa-mir-196a	Adenocarcinoma	8
46	hsa-mir-200a	Adenocarcinoma	8
47	hsa-mir-200b	Adenocarcinoma	8
48	hsa-mir-200c	Adenocarcinoma	8
49	hsa-mir-204	Adenocarcinoma	8
50	hsa-mir-205	Adenocarcinoma	8
51	hsa-mir-20a	Adenocarcinoma	8
52	hsa-mir-21	Adenocarcinoma	8
53	hsa-mir-210	Adenocarcinoma	8
54	hsa-mir-215	Adenocarcinoma	8
55	hsa-mir-221	Adenocarcinoma	8
56	hsa-mir-223	Adenocarcinoma	8
57	hsa-mir-25	Adenocarcinoma	8
58	hsa-mir-26b	Adenocarcinoma	8
59	hsa-mir-31	Adenocarcinoma	8
60	hsa-mir-34b	Adenocarcinoma	8
61	hsa-mir-429	Adenocarcinoma	8
62	hsa-mir-449a	Adenocarcinoma	8
63	hsa-mir-449b	Adenocarcinoma	8
64	hsa-mir-92a	Adenocarcinoma	8
65	hsa-mir-93	Adenocarcinoma	8
66	hsa-mir-95	Adenocarcinoma	8
67	hsa-mir-99b	Adenocarcinoma	8
68	hsa-mir-21	Adenoma	9
69	hsa-let-7e	Adenoviridae Infections	10
70	hsa-mir-101	Adenoviridae Infections	10
71	hsa-mir-1180	Adenoviridae Infections	10
72	hsa-mir-1184	Adenoviridae Infections	10
73	hsa-mir-1246	Adenoviridae Infections	10
74	hsa-mir-1247	Adenoviridae Infections	10
75	hsa-mir-125b	Adenoviridae Infections	10
76	hsa-mir-1273a	Adenoviridae Infections	10
77	hsa-mir-1302	Adenoviridae Infections	10
78	hsa-mir-146b	Adenoviridae Infections	10
79	hsa-mir-148a	Adenoviridae Infections	10
80	hsa-mir-148b	Adenoviridae Infections	10
81	hsa-mir-150	Adenoviridae Infections	10
82	hsa-mir-17	Adenoviridae Infections	10
83	hsa-mir-181b	Adenoviridae Infections	10
84	hsa-mir-18a	Adenoviridae Infections	10
85	hsa-mir-18b	Adenoviridae Infections	10
86	hsa-mir-191	Adenoviridae Infections	10
87	hsa-mir-196b	Adenoviridae Infections	10
88	hsa-mir-1972	Adenoviridae Infections	10
89	hsa-mir-19b	Adenoviridae Infections	10
90	hsa-mir-210	Adenoviridae Infections	10
91	hsa-mir-25	Adenoviridae Infections	10
92	hsa-mir-26b	Adenoviridae Infections	10
93	hsa-mir-27a	Adenoviridae Infections	10
94	hsa-mir-27b	Adenoviridae Infections	10
95	hsa-mir-30a	Adenoviridae Infections	10
96	hsa-mir-30b	Adenoviridae Infections	10
97	hsa-mir-30c	Adenoviridae Infections	10
98	hsa-mir-320c	Adenoviridae Infections	10
99	hsa-mir-324	Adenoviridae Infections	10
100	hsa-mir-338	Adenoviridae Infections	10
101	hsa-mir-33a	Adenoviridae Infections	10
102	hsa-mir-342	Adenoviridae Infections	10
103	hsa-mir-345	Adenoviridae Infections	10
104	hsa-mir-34a	Adenoviridae Infections	10
105	hsa-mir-362	Adenoviridae Infections	10
106	hsa-mir-374b	Adenoviridae Infections	10
107	hsa-mir-378a	Adenoviridae Infections	10
108	hsa-mir-421	Adenoviridae Infections	10
109	hsa-mir-433	Adenoviridae Infections	10
110	hsa-mir-452	Adenoviridae Infections	10
111	hsa-mir-454	Adenoviridae Infections	10
112	hsa-mir-505	Adenoviridae Infections	10
113	hsa-mir-519a	Adenoviridae Infections	10
114	hsa-mir-566	Adenoviridae Infections	10
115	hsa-mir-582	Adenoviridae Infections	10
116	hsa-mir-589	Adenoviridae Infections	10
117	hsa-mir-619	Adenoviridae Infections	10
118	hsa-mir-627	Adenoviridae Infections	10
119	hsa-mir-635	Adenoviridae Infections	10
120	hsa-mir-650	Adenoviridae Infections	10
121	hsa-mir-655	Adenoviridae Infections	10
122	hsa-mir-7	Adenoviridae Infections	10
123	hsa-mir-744	Adenoviridae Infections	10
124	hsa-mir-92a	Adenoviridae Infections	10
125	hsa-mir-942	Adenoviridae Infections	10
126	hsa-mir-100	Adrenal Cortex Neoplasms	11
127	hsa-mir-200b	Adrenal Cortex Neoplasms	11
128	hsa-mir-210	Adrenal Cortex Neoplasms	11
129	hsa-mir-214	Adrenal Cortex Neoplasms	11
130	hsa-mir-484	Adrenal Cortex Neoplasms	11
131	hsa-mir-503	Adrenal Cortex Neoplasms	11
132	hsa-mir-99a	Adrenal Cortex Neoplasms	11
133	hsa-mir-130a	Adrenocortical Adenoma	12
134	hsa-mir-195	Adrenocortical Adenoma	12
135	hsa-mir-200b	Adrenocortical Adenoma	12
136	hsa-mir-210	Adrenocortical Adenoma	12
137	hsa-mir-382	Adrenocortical Adenoma	12
138	hsa-mir-483	Adrenocortical Adenoma	12
139	hsa-mir-484	Adrenocortical Adenoma	12
140	hsa-let-7a	Adrenocortical Carcinoma	13
141	hsa-let-7b	Adrenocortical Carcinoma	13
142	hsa-let-7c	Adrenocortical Carcinoma	13
143	hsa-let-7d	Adrenocortical Carcinoma	13
144	hsa-mir-1	Adrenocortical Carcinoma	13
145	hsa-mir-100	Adrenocortical Carcinoma	13
146	hsa-mir-106b	Adrenocortical Carcinoma	13
147	hsa-mir-125b	Adrenocortical Carcinoma	13
148	hsa-mir-126	Adrenocortical Carcinoma	13
149	hsa-mir-130a	Adrenocortical Carcinoma	13
150	hsa-mir-132	Adrenocortical Carcinoma	13
151	hsa-mir-133a	Adrenocortical Carcinoma	13
152	hsa-mir-135a	Adrenocortical Carcinoma	13
153	hsa-mir-137	Adrenocortical Carcinoma	13
154	hsa-mir-139	Adrenocortical Carcinoma	13
155	hsa-mir-143	Adrenocortical Carcinoma	13
156	hsa-mir-145	Adrenocortical Carcinoma	13
157	hsa-mir-146a	Adrenocortical Carcinoma	13
158	hsa-mir-148a	Adrenocortical Carcinoma	13
159	hsa-mir-155	Adrenocortical Carcinoma	13
160	hsa-mir-15b	Adrenocortical Carcinoma	13
161	hsa-mir-16	Adrenocortical Carcinoma	13
162	hsa-mir-17	Adrenocortical Carcinoma	13
163	hsa-mir-192	Adrenocortical Carcinoma	13
164	hsa-mir-194	Adrenocortical Carcinoma	13
165	hsa-mir-195	Adrenocortical Carcinoma	13
166	hsa-mir-196a	Adrenocortical Carcinoma	13
167	hsa-mir-200b	Adrenocortical Carcinoma	13
168	hsa-mir-200c	Adrenocortical Carcinoma	13
169	hsa-mir-210	Adrenocortical Carcinoma	13
170	hsa-mir-222	Adrenocortical Carcinoma	13
171	hsa-mir-23b	Adrenocortical Carcinoma	13
172	hsa-mir-28	Adrenocortical Carcinoma	13
173	hsa-mir-301a	Adrenocortical Carcinoma	13
174	hsa-mir-301b	Adrenocortical Carcinoma	13
175	hsa-mir-30a	Adrenocortical Carcinoma	13
176	hsa-mir-335	Adrenocortical Carcinoma	13
177	hsa-mir-375	Adrenocortical Carcinoma	13
178	hsa-mir-376a	Adrenocortical Carcinoma	13
179	hsa-mir-376b	Adrenocortical Carcinoma	13
180	hsa-mir-376c	Adrenocortical Carcinoma	13
181	hsa-mir-424	Adrenocortical Carcinoma	13
182	hsa-mir-449a	Adrenocortical Carcinoma	13
183	hsa-mir-449b	Adrenocortical Carcinoma	13
184	hsa-mir-483	Adrenocortical Carcinoma	13
185	hsa-mir-484	Adrenocortical Carcinoma	13
186	hsa-mir-491	Adrenocortical Carcinoma	13
187	hsa-mir-675	Adrenocortical Carcinoma	13
188	hsa-mir-7	Adrenocortical Carcinoma	13
189	hsa-mir-21	AIDS Dementia Complex	2
190	hsa-mir-34a	AIDS Dementia Complex	2
191	hsa-mir-21	Albuminuria	14
192	hsa-mir-106b	Alopecia	15
193	hsa-mir-125b	Alopecia	15
194	hsa-mir-221	Alopecia	15
195	hsa-mir-410	Alopecia	15
196	hsa-mir-101	Alzheimer Disease	16
197	hsa-mir-103a	Alzheimer Disease	16
198	hsa-mir-106b	Alzheimer Disease	16
199	hsa-mir-107	Alzheimer Disease	16
200	hsa-mir-124	Alzheimer Disease	16
201	hsa-mir-125b	Alzheimer Disease	16
202	hsa-mir-128	Alzheimer Disease	16
203	hsa-mir-137	Alzheimer Disease	16
204	hsa-mir-144	Alzheimer Disease	16
205	hsa-mir-146a	Alzheimer Disease	16
206	hsa-mir-153	Alzheimer Disease	16
207	hsa-mir-17	Alzheimer Disease	16
208	hsa-mir-181c	Alzheimer Disease	16
209	hsa-mir-195	Alzheimer Disease	16
210	hsa-mir-20a	Alzheimer Disease	16
211	hsa-mir-21	Alzheimer Disease	16
212	hsa-mir-29a	Alzheimer Disease	16
213	hsa-mir-29b	Alzheimer Disease	16
214	hsa-mir-34c	Alzheimer Disease	16
215	hsa-mir-590	Alzheimer Disease	16
216	hsa-mir-9	Alzheimer Disease	16
217	hsa-mir-148a	Amyloidosis	17
218	hsa-mir-16	Amyloidosis	17
219	hsa-mir-26a	Amyloidosis	17
220	hsa-mir-206	Amyotrophic Lateral Sclerosis	18
221	hsa-mir-151a	Anemia, Sickle Cell	19
222	hsa-mir-26b	Anemia, Sickle Cell	19
223	hsa-mir-20a	Angina, Unstable	20
224	hsa-mir-199a	Anoxia	21
225	hsa-mir-19b	Antiphospholipid Syndrome	22
226	hsa-mir-20a	Antiphospholipid Syndrome	22
227	hsa-mir-15b	Anus Neoplasms	23
228	hsa-mir-148a	Anxiety Disorders	24
229	hsa-mir-148b	Anxiety Disorders	24
230	hsa-mir-152	Anxiety Disorders	24
231	hsa-mir-485	Anxiety Disorders	24
232	hsa-mir-765	Anxiety Disorders	24
233	hsa-mir-21	Aortic Aneurysm, Abdominal	25
234	hsa-mir-1	Aortic Aneurysm, Thoracic	26
235	hsa-mir-133a	Aortic Aneurysm, Thoracic	26
236	hsa-mir-21	Aortic Aneurysm, Thoracic	26
237	hsa-mir-29a	Aortic Aneurysm, Thoracic	26
238	hsa-mir-29b	Aortic Aneurysm, Thoracic	26
239	hsa-mir-29c	Aortic Aneurysm, Thoracic	26
240	hsa-mir-30a	Aortic Aneurysm, Thoracic	26
241	hsa-mir-30b	Aortic Aneurysm, Thoracic	26
242	hsa-mir-30c	Aortic Aneurysm, Thoracic	26
243	hsa-mir-30d	Aortic Aneurysm, Thoracic	26
244	hsa-mir-30e	Aortic Aneurysm, Thoracic	26
245	hsa-mir-195	Aortic Valve Insufficiency	27
246	hsa-mir-26a	Aortic Valve Insufficiency	27
247	hsa-mir-30b	Aortic Valve Insufficiency	27
248	hsa-mir-141	Aortic Valve Stenosis	28
249	hsa-mir-195	Aortic Valve Stenosis	28
250	hsa-mir-21	Aortic Valve Stenosis	28
251	hsa-mir-26a	Aortic Valve Stenosis	28
252	hsa-mir-30b	Aortic Valve Stenosis	28
253	hsa-mir-1	Arrhythmias, Cardiac	29
254	hsa-mir-133a	Arrhythmias, Cardiac	29
255	hsa-mir-140	Arthritis	30
256	hsa-mir-15a	Arthritis	30
257	hsa-mir-146a	Arthritis, Psoriatic	31
258	hsa-mir-15a	Arthritis, Psoriatic	31
259	hsa-mir-124	Arthritis, Rheumatoid	32
260	hsa-mir-132	Arthritis, Rheumatoid	32
261	hsa-mir-146a	Arthritis, Rheumatoid	32
262	hsa-mir-155	Arthritis, Rheumatoid	32
263	hsa-mir-15a	Arthritis, Rheumatoid	32
264	hsa-mir-16	Arthritis, Rheumatoid	32
265	hsa-mir-18a	Arthritis, Rheumatoid	32
266	hsa-mir-19a	Arthritis, Rheumatoid	32
267	hsa-mir-19b	Arthritis, Rheumatoid	32
268	hsa-mir-223	Arthritis, Rheumatoid	32
269	hsa-mir-346	Arthritis, Rheumatoid	32
270	hsa-mir-34a	Arthritis, Rheumatoid	32
271	hsa-mir-363	Arthritis, Rheumatoid	32
272	hsa-mir-498	Arthritis, Rheumatoid	32
273	hsa-mir-499a	Arthritis, Rheumatoid	32
274	hsa-let-7a	Asthma	33
275	hsa-let-7b	Asthma	33
276	hsa-let-7c	Asthma	33
277	hsa-let-7d	Asthma	33
278	hsa-let-7e	Asthma	33
279	hsa-let-7f	Asthma	33
280	hsa-let-7g	Asthma	33
281	hsa-let-7i	Asthma	33
282	hsa-mir-126	Asthma	33
283	hsa-mir-146a	Asthma	33
284	hsa-mir-146b	Asthma	33
285	hsa-mir-148a	Asthma	33
286	hsa-mir-148b	Asthma	33
287	hsa-mir-152	Asthma	33
288	hsa-mir-155	Asthma	33
289	hsa-mir-221	Asthma	33
290	hsa-mir-28	Asthma	33
291	hsa-mir-485	Asthma	33
292	hsa-mir-106a	Astrocytoma	34
293	hsa-mir-107	Astrocytoma	34
294	hsa-mir-124	Astrocytoma	34
295	hsa-mir-133a	Astrocytoma	34
296	hsa-mir-137	Astrocytoma	34
297	hsa-mir-138	Astrocytoma	34
298	hsa-mir-149	Astrocytoma	34
299	hsa-mir-150	Astrocytoma	34
300	hsa-mir-15b	Astrocytoma	34
301	hsa-mir-181b	Astrocytoma	34
302	hsa-mir-197	Astrocytoma	34
303	hsa-mir-21	Astrocytoma	34
304	hsa-mir-221	Astrocytoma	34
305	hsa-mir-23a	Astrocytoma	34
306	hsa-mir-335	Astrocytoma	34
307	hsa-mir-497	Astrocytoma	34
308	hsa-mir-548b	Astrocytoma	34
309	hsa-mir-100	Atherosclerosis	35
310	hsa-mir-10a	Atherosclerosis	35
311	hsa-mir-126	Atherosclerosis	35
312	hsa-mir-127	Atherosclerosis	35
313	hsa-mir-133a	Atherosclerosis	35
314	hsa-mir-133b	Atherosclerosis	35
315	hsa-mir-143	Atherosclerosis	35
316	hsa-mir-145	Atherosclerosis	35
317	hsa-mir-146a	Atherosclerosis	35
318	hsa-mir-146b	Atherosclerosis	35
319	hsa-mir-152	Atherosclerosis	35
320	hsa-mir-155	Atherosclerosis	35
321	hsa-mir-17	Atherosclerosis	35
322	hsa-mir-21	Atherosclerosis	35
323	hsa-mir-210	Atherosclerosis	35
324	hsa-mir-221	Atherosclerosis	35
325	hsa-mir-222	Atherosclerosis	35
326	hsa-mir-296	Atherosclerosis	35
327	hsa-mir-29b	Atherosclerosis	35
328	hsa-mir-342	Atherosclerosis	35
329	hsa-mir-34a	Atherosclerosis	35
330	hsa-mir-422a	Atherosclerosis	35
331	hsa-mir-99b	Atherosclerosis	35
332	hsa-mir-133a	Atrial Fibrillation	36
333	hsa-mir-133b	Atrial Fibrillation	36
334	hsa-mir-142	Atrial Fibrillation	36
335	hsa-mir-146b	Atrial Fibrillation	36
336	hsa-mir-155	Atrial Fibrillation	36
337	hsa-mir-193a	Atrial Fibrillation	36
338	hsa-mir-193b	Atrial Fibrillation	36
339	hsa-mir-19a	Atrial Fibrillation	36
340	hsa-mir-19b	Atrial Fibrillation	36
341	hsa-mir-223	Atrial Fibrillation	36
342	hsa-mir-30a	Atrial Fibrillation	36
343	hsa-mir-30b	Atrial Fibrillation	36
344	hsa-mir-30c	Atrial Fibrillation	36
345	hsa-mir-30d	Atrial Fibrillation	36
346	hsa-mir-328	Atrial Fibrillation	36
347	hsa-mir-519b	Atrial Fibrillation	36
348	hsa-mir-125a	Atrophy	37
349	hsa-mir-208b	Atrophy	37
350	hsa-mir-23a	Atrophy	37
351	hsa-mir-106a	Autistic Disorder	38
352	hsa-mir-106b	Autistic Disorder	38
353	hsa-mir-129	Autistic Disorder	38
354	hsa-mir-132	Autistic Disorder	38
355	hsa-mir-140	Autistic Disorder	38
356	hsa-mir-146a	Autistic Disorder	38
357	hsa-mir-146b	Autistic Disorder	38
358	hsa-mir-148b	Autistic Disorder	38
359	hsa-mir-15a	Autistic Disorder	38
360	hsa-mir-15b	Autistic Disorder	38
361	hsa-mir-181b	Autistic Disorder	38
362	hsa-mir-181d	Autistic Disorder	38
363	hsa-mir-193b	Autistic Disorder	38
364	hsa-mir-21	Autistic Disorder	38
365	hsa-mir-212	Autistic Disorder	38
366	hsa-mir-23a	Autistic Disorder	38
367	hsa-mir-23b	Autistic Disorder	38
368	hsa-mir-27a	Autistic Disorder	38
369	hsa-mir-363	Autistic Disorder	38
370	hsa-mir-381	Autistic Disorder	38
371	hsa-mir-431	Autistic Disorder	38
372	hsa-mir-432	Autistic Disorder	38
373	hsa-mir-484	Autistic Disorder	38
374	hsa-mir-539	Autistic Disorder	38
375	hsa-mir-550a	Autistic Disorder	38
376	hsa-mir-598	Autistic Disorder	38
377	hsa-mir-652	Autistic Disorder	38
378	hsa-mir-663a	Autistic Disorder	38
379	hsa-mir-7	Autistic Disorder	38
380	hsa-mir-92a	Autistic Disorder	38
381	hsa-mir-93	Autistic Disorder	38
382	hsa-mir-95	Autistic Disorder	38
383	hsa-mir-16	Autoimmune Diseases	39
384	hsa-mir-141	Azoospermia	40
385	hsa-mir-17	Azoospermia	40
386	hsa-mir-18a	Azoospermia	40
387	hsa-mir-19a	Azoospermia	40
388	hsa-mir-19b	Azoospermia	40
389	hsa-mir-20a	Azoospermia	40
390	hsa-mir-302a	Azoospermia	40
391	hsa-mir-371a	Azoospermia	40
392	hsa-mir-372	Azoospermia	40
393	hsa-mir-373	Azoospermia	40
394	hsa-mir-383	Azoospermia	40
395	hsa-mir-429	Azoospermia	40
396	hsa-mir-491	Azoospermia	40
397	hsa-mir-520d	Azoospermia	40
398	hsa-mir-7	Azoospermia	40
399	hsa-mir-92a	Azoospermia	40
400	hsa-let-7a	Barrett Esophagus	41
401	hsa-mir-141	Barrett Esophagus	41
402	hsa-mir-143	Barrett Esophagus	41
403	hsa-mir-145	Barrett Esophagus	41
404	hsa-mir-15b	Barrett Esophagus	41
405	hsa-mir-192	Barrett Esophagus	41
406	hsa-mir-196a	Barrett Esophagus	41
407	hsa-mir-200a	Barrett Esophagus	41
408	hsa-mir-200b	Barrett Esophagus	41
409	hsa-mir-200c	Barrett Esophagus	41
410	hsa-mir-21	Barrett Esophagus	41
411	hsa-mir-223	Barrett Esophagus	41
412	hsa-mir-31	Barrett Esophagus	41
413	hsa-mir-375	Barrett Esophagus	41
414	hsa-mir-429	Barrett Esophagus	41
415	hsa-mir-146a	Behcet Syndrome	42
416	hsa-mir-155	Behcet Syndrome	42
417	hsa-mir-29a	Biliary Atresia	43
418	hsa-mir-29b	Biliary Atresia	43
419	hsa-let-7f	Biliary Tract Neoplasms	44
420	hsa-let-7i	Biliary Tract Neoplasms	44
421	hsa-mir-105	Biliary Tract Neoplasms	44
422	hsa-mir-145	Biliary Tract Neoplasms	44
423	hsa-mir-147b	Biliary Tract Neoplasms	44
424	hsa-mir-199a	Biliary Tract Neoplasms	44
425	hsa-mir-222	Biliary Tract Neoplasms	44
426	hsa-mir-302c	Biliary Tract Neoplasms	44
427	hsa-mir-421	Biliary Tract Neoplasms	44
428	hsa-mir-9	Biliary Tract Neoplasms	44
429	hsa-mir-942	Biliary Tract Neoplasms	44
430	hsa-let-7i	Brain Injuries	45
431	hsa-mir-21	Brain Injuries	45
432	hsa-mir-29c	Brain Injuries	45
433	hsa-mir-124	Brain Ischemia	46
434	hsa-mir-210	Brain Ischemia	46
435	hsa-mir-129	Brain Neoplasms	47
436	hsa-mir-21	Brain Neoplasms	47
437	hsa-mir-222	Brain Neoplasms	47
438	hsa-mir-326	Brain Neoplasms	47
439	hsa-mir-34a	Brain Neoplasms	47
440	hsa-mir-9	Brain Neoplasms	47
441	hsa-mir-92b	Brain Neoplasms	47
442	hsa-let-7a	Breast Neoplasms	48
443	hsa-let-7b	Breast Neoplasms	48
444	hsa-let-7c	Breast Neoplasms	48
445	hsa-let-7d	Breast Neoplasms	48
446	hsa-let-7e	Breast Neoplasms	48
447	hsa-let-7f	Breast Neoplasms	48
448	hsa-let-7g	Breast Neoplasms	48
449	hsa-let-7i	Breast Neoplasms	48
450	hsa-mir-1	Breast Neoplasms	48
451	hsa-mir-100	Breast Neoplasms	48
452	hsa-mir-101	Breast Neoplasms	48
453	hsa-mir-103a	Breast Neoplasms	48
454	hsa-mir-103b	Breast Neoplasms	48
455	hsa-mir-106b	Breast Neoplasms	48
456	hsa-mir-107	Breast Neoplasms	48
457	hsa-mir-10a	Breast Neoplasms	48
458	hsa-mir-10b	Breast Neoplasms	48
459	hsa-mir-122	Breast Neoplasms	48
460	hsa-mir-124	Breast Neoplasms	48
461	hsa-mir-1245a	Breast Neoplasms	48
462	hsa-mir-1245b	Breast Neoplasms	48
463	hsa-mir-1258	Breast Neoplasms	48
464	hsa-mir-125a	Breast Neoplasms	48
465	hsa-mir-125b	Breast Neoplasms	48
466	hsa-mir-126	Breast Neoplasms	48
467	hsa-mir-127	Breast Neoplasms	48
468	hsa-mir-128	Breast Neoplasms	48
469	hsa-mir-129	Breast Neoplasms	48
470	hsa-mir-1290	Breast Neoplasms	48
471	hsa-mir-132	Breast Neoplasms	48
472	hsa-mir-1323	Breast Neoplasms	48
473	hsa-mir-133a	Breast Neoplasms	48
474	hsa-mir-133b	Breast Neoplasms	48
475	hsa-mir-135a	Breast Neoplasms	48
476	hsa-mir-135b	Breast Neoplasms	48
477	hsa-mir-137	Breast Neoplasms	48
478	hsa-mir-139	Breast Neoplasms	48
479	hsa-mir-140	Breast Neoplasms	48
480	hsa-mir-141	Breast Neoplasms	48
481	hsa-mir-143	Breast Neoplasms	48
482	hsa-mir-145	Breast Neoplasms	48
483	hsa-mir-1469	Breast Neoplasms	48
484	hsa-mir-146a	Breast Neoplasms	48
485	hsa-mir-146b	Breast Neoplasms	48
486	hsa-mir-1471	Breast Neoplasms	48
487	hsa-mir-147a	Breast Neoplasms	48
488	hsa-mir-148a	Breast Neoplasms	48
489	hsa-mir-148b	Breast Neoplasms	48
490	hsa-mir-149	Breast Neoplasms	48
491	hsa-mir-151a	Breast Neoplasms	48
492	hsa-mir-151b	Breast Neoplasms	48
493	hsa-mir-152	Breast Neoplasms	48
494	hsa-mir-153	Breast Neoplasms	48
495	hsa-mir-155	Breast Neoplasms	48
496	hsa-mir-15a	Breast Neoplasms	48
497	hsa-mir-16	Breast Neoplasms	48
498	hsa-mir-17	Breast Neoplasms	48
499	hsa-mir-181a	Breast Neoplasms	48
500	hsa-mir-181b	Breast Neoplasms	48
501	hsa-mir-182	Breast Neoplasms	48
502	hsa-mir-183	Breast Neoplasms	48
503	hsa-mir-187	Breast Neoplasms	48
504	hsa-mir-18a	Breast Neoplasms	48
505	hsa-mir-18b	Breast Neoplasms	48
506	hsa-mir-191	Breast Neoplasms	48
507	hsa-mir-1915	Breast Neoplasms	48
508	hsa-mir-193a	Breast Neoplasms	48
509	hsa-mir-193b	Breast Neoplasms	48
510	hsa-mir-194	Breast Neoplasms	48
511	hsa-mir-195	Breast Neoplasms	48
512	hsa-mir-196a	Breast Neoplasms	48
513	hsa-mir-197	Breast Neoplasms	48
514	hsa-mir-199a	Breast Neoplasms	48
515	hsa-mir-199b	Breast Neoplasms	48
516	hsa-mir-19a	Breast Neoplasms	48
517	hsa-mir-19b	Breast Neoplasms	48
518	hsa-mir-200a	Breast Neoplasms	48
519	hsa-mir-200b	Breast Neoplasms	48
520	hsa-mir-200c	Breast Neoplasms	48
521	hsa-mir-202	Breast Neoplasms	48
522	hsa-mir-204	Breast Neoplasms	48
523	hsa-mir-205	Breast Neoplasms	48
524	hsa-mir-206	Breast Neoplasms	48
525	hsa-mir-20a	Breast Neoplasms	48
526	hsa-mir-20b	Breast Neoplasms	48
527	hsa-mir-21	Breast Neoplasms	48
528	hsa-mir-210	Breast Neoplasms	48
529	hsa-mir-214	Breast Neoplasms	48
530	hsa-mir-215	Breast Neoplasms	48
531	hsa-mir-218	Breast Neoplasms	48
532	hsa-mir-22	Breast Neoplasms	48
533	hsa-mir-221	Breast Neoplasms	48
534	hsa-mir-222	Breast Neoplasms	48
535	hsa-mir-223	Breast Neoplasms	48
536	hsa-mir-224	Breast Neoplasms	48
537	hsa-mir-2355	Breast Neoplasms	48
538	hsa-mir-23a	Breast Neoplasms	48
539	hsa-mir-23b	Breast Neoplasms	48
540	hsa-mir-24	Breast Neoplasms	48
541	hsa-mir-25	Breast Neoplasms	48
542	hsa-mir-26a	Breast Neoplasms	48
543	hsa-mir-26b	Breast Neoplasms	48
544	hsa-mir-27a	Breast Neoplasms	48
545	hsa-mir-27b	Breast Neoplasms	48
546	hsa-mir-296	Breast Neoplasms	48
547	hsa-mir-298	Breast Neoplasms	48
548	hsa-mir-299	Breast Neoplasms	48
549	hsa-mir-29a	Breast Neoplasms	48
550	hsa-mir-29b	Breast Neoplasms	48
551	hsa-mir-29c	Breast Neoplasms	48
552	hsa-mir-301a	Breast Neoplasms	48
553	hsa-mir-301b	Breast Neoplasms	48
554	hsa-mir-302a	Breast Neoplasms	48
555	hsa-mir-302b	Breast Neoplasms	48
556	hsa-mir-302c	Breast Neoplasms	48
557	hsa-mir-302d	Breast Neoplasms	48
558	hsa-mir-30a	Breast Neoplasms	48
559	hsa-mir-30b	Breast Neoplasms	48
560	hsa-mir-30c	Breast Neoplasms	48
561	hsa-mir-30d	Breast Neoplasms	48
562	hsa-mir-31	Breast Neoplasms	48
563	hsa-mir-3130	Breast Neoplasms	48
564	hsa-mir-3186	Breast Neoplasms	48
565	hsa-mir-320a	Breast Neoplasms	48
566	hsa-mir-320b	Breast Neoplasms	48
567	hsa-mir-320c	Breast Neoplasms	48
568	hsa-mir-320d	Breast Neoplasms	48
569	hsa-mir-320e	Breast Neoplasms	48
570	hsa-mir-324	Breast Neoplasms	48
571	hsa-mir-326	Breast Neoplasms	48
572	hsa-mir-328	Breast Neoplasms	48
573	hsa-mir-335	Breast Neoplasms	48
574	hsa-mir-338	Breast Neoplasms	48
575	hsa-mir-339	Breast Neoplasms	48
576	hsa-mir-340	Breast Neoplasms	48
577	hsa-mir-342	Breast Neoplasms	48
578	hsa-mir-345	Breast Neoplasms	48
579	hsa-mir-34a	Breast Neoplasms	48
580	hsa-mir-34b	Breast Neoplasms	48
581	hsa-mir-34c	Breast Neoplasms	48
582	hsa-mir-365a	Breast Neoplasms	48
583	hsa-mir-365b	Breast Neoplasms	48
584	hsa-mir-367	Breast Neoplasms	48
585	hsa-mir-373	Breast Neoplasms	48
586	hsa-mir-374a	Breast Neoplasms	48
587	hsa-mir-375	Breast Neoplasms	48
588	hsa-mir-376c	Breast Neoplasms	48
589	hsa-mir-383	Breast Neoplasms	48
590	hsa-mir-409	Breast Neoplasms	48
591	hsa-mir-411	Breast Neoplasms	48
592	hsa-mir-423	Breast Neoplasms	48
593	hsa-mir-425	Breast Neoplasms	48
594	hsa-mir-4257	Breast Neoplasms	48
595	hsa-mir-429	Breast Neoplasms	48
596	hsa-mir-4306	Breast Neoplasms	48
597	hsa-mir-450a	Breast Neoplasms	48
598	hsa-mir-450b	Breast Neoplasms	48
599	hsa-mir-451a	Breast Neoplasms	48
600	hsa-mir-452	Breast Neoplasms	48
601	hsa-mir-488	Breast Neoplasms	48
602	hsa-mir-493	Breast Neoplasms	48
603	hsa-mir-495	Breast Neoplasms	48
604	hsa-mir-497	Breast Neoplasms	48
605	hsa-mir-499a	Breast Neoplasms	48
606	hsa-mir-505	Breast Neoplasms	48
607	hsa-mir-506	Breast Neoplasms	48
608	hsa-mir-510	Breast Neoplasms	48
609	hsa-mir-513a	Breast Neoplasms	48
610	hsa-mir-515	Breast Neoplasms	48
611	hsa-mir-516a	Breast Neoplasms	48
612	hsa-mir-516b	Breast Neoplasms	48
613	hsa-mir-519c	Breast Neoplasms	48
614	hsa-mir-519d	Breast Neoplasms	48
615	hsa-mir-519e	Breast Neoplasms	48
616	hsa-mir-520a	Breast Neoplasms	48
617	hsa-mir-520b	Breast Neoplasms	48
618	hsa-mir-520c	Breast Neoplasms	48
619	hsa-mir-520d	Breast Neoplasms	48
620	hsa-mir-520h	Breast Neoplasms	48
621	hsa-mir-526a	Breast Neoplasms	48
622	hsa-mir-584	Breast Neoplasms	48
623	hsa-mir-608	Breast Neoplasms	48
624	hsa-mir-625	Breast Neoplasms	48
625	hsa-mir-629	Breast Neoplasms	48
626	hsa-mir-632	Breast Neoplasms	48
627	hsa-mir-638	Breast Neoplasms	48
628	hsa-mir-661	Breast Neoplasms	48
629	hsa-mir-663a	Breast Neoplasms	48
630	hsa-mir-7	Breast Neoplasms	48
631	hsa-mir-708	Breast Neoplasms	48
632	hsa-mir-718	Breast Neoplasms	48
633	hsa-mir-874	Breast Neoplasms	48
634	hsa-mir-9	Breast Neoplasms	48
635	hsa-mir-922	Breast Neoplasms	48
636	hsa-mir-92a	Breast Neoplasms	48
637	hsa-mir-93	Breast Neoplasms	48
638	hsa-mir-96	Breast Neoplasms	48
639	hsa-mir-127	Burkitt Lymphoma	49
640	hsa-mir-146a	Burkitt Lymphoma	49
641	hsa-mir-155	Burkitt Lymphoma	49
642	hsa-mir-17	Burkitt Lymphoma	49
643	hsa-mir-18a	Burkitt Lymphoma	49
644	hsa-mir-19a	Burkitt Lymphoma	49
645	hsa-mir-19b	Burkitt Lymphoma	49
646	hsa-mir-20a	Burkitt Lymphoma	49
647	hsa-mir-92a	Burkitt Lymphoma	49
648	hsa-mir-93	Burkitt Lymphoma	49
649	hsa-mir-106b	Carcinoma, Basal Cell	50
650	hsa-mir-125a	Carcinoma, Basal Cell	50
651	hsa-mir-139	Carcinoma, Basal Cell	50
652	hsa-mir-140	Carcinoma, Basal Cell	50
653	hsa-mir-145	Carcinoma, Basal Cell	50
654	hsa-mir-17	Carcinoma, Basal Cell	50
655	hsa-mir-181c	Carcinoma, Basal Cell	50
656	hsa-mir-181d	Carcinoma, Basal Cell	50
657	hsa-mir-182	Carcinoma, Basal Cell	50
658	hsa-mir-183	Carcinoma, Basal Cell	50
659	hsa-mir-18a	Carcinoma, Basal Cell	50
660	hsa-mir-18b	Carcinoma, Basal Cell	50
661	hsa-mir-19b	Carcinoma, Basal Cell	50
662	hsa-mir-2861	Carcinoma, Basal Cell	50
663	hsa-mir-29c	Carcinoma, Basal Cell	50
664	hsa-mir-3196	Carcinoma, Basal Cell	50
665	hsa-mir-378a	Carcinoma, Basal Cell	50
666	hsa-mir-378b	Carcinoma, Basal Cell	50
667	hsa-mir-378c	Carcinoma, Basal Cell	50
668	hsa-mir-378d	Carcinoma, Basal Cell	50
669	hsa-mir-378e	Carcinoma, Basal Cell	50
670	hsa-mir-378f	Carcinoma, Basal Cell	50
671	hsa-mir-378g	Carcinoma, Basal Cell	50
672	hsa-mir-378h	Carcinoma, Basal Cell	50
673	hsa-mir-378i	Carcinoma, Basal Cell	50
674	hsa-mir-455	Carcinoma, Basal Cell	50
675	hsa-mir-542	Carcinoma, Basal Cell	50
676	hsa-mir-572	Carcinoma, Basal Cell	50
677	hsa-mir-638	Carcinoma, Basal Cell	50
678	hsa-mir-93	Carcinoma, Basal Cell	50
679	hsa-mir-21	Carcinoma, Ductal, Breast	51
680	hsa-mir-141	Carcinoma, Ehrlich Tumor	52
681	hsa-mir-182	Carcinoma, Ehrlich Tumor	52
682	hsa-mir-183	Carcinoma, Ehrlich Tumor	52
683	hsa-mir-200a	Carcinoma, Ehrlich Tumor	52
684	hsa-mir-200b	Carcinoma, Ehrlich Tumor	52
685	hsa-mir-429	Carcinoma, Ehrlich Tumor	52
686	hsa-mir-96	Carcinoma, Ehrlich Tumor	52
687	hsa-mir-302b	Carcinoma, Embryonal	53
688	hsa-mir-206	Carcinoma, Endometrioid	54
689	hsa-mir-21	Carcinoma, Endometrioid	54
690	hsa-mir-503	Carcinoma, Endometrioid	54
691	hsa-let-7a	Carcinoma, Hepatocellular	55
692	hsa-let-7b	Carcinoma, Hepatocellular	55
693	hsa-let-7c	Carcinoma, Hepatocellular	55
694	hsa-let-7d	Carcinoma, Hepatocellular	55
695	hsa-let-7e	Carcinoma, Hepatocellular	55
696	hsa-let-7f	Carcinoma, Hepatocellular	55
697	hsa-let-7g	Carcinoma, Hepatocellular	55
698	hsa-let-7i	Carcinoma, Hepatocellular	55
699	hsa-mir-1	Carcinoma, Hepatocellular	55
700	hsa-mir-100	Carcinoma, Hepatocellular	55
701	hsa-mir-101	Carcinoma, Hepatocellular	55
702	hsa-mir-103a	Carcinoma, Hepatocellular	55
703	hsa-mir-105	Carcinoma, Hepatocellular	55
704	hsa-mir-106a	Carcinoma, Hepatocellular	55
705	hsa-mir-106b	Carcinoma, Hepatocellular	55
706	hsa-mir-107	Carcinoma, Hepatocellular	55
707	hsa-mir-10a	Carcinoma, Hepatocellular	55
708	hsa-mir-10b	Carcinoma, Hepatocellular	55
709	hsa-mir-1202	Carcinoma, Hepatocellular	55
710	hsa-mir-122	Carcinoma, Hepatocellular	55
711	hsa-mir-1224	Carcinoma, Hepatocellular	55
712	hsa-mir-1231	Carcinoma, Hepatocellular	55
713	hsa-mir-1234	Carcinoma, Hepatocellular	55
714	hsa-mir-124	Carcinoma, Hepatocellular	55
715	hsa-mir-1249	Carcinoma, Hepatocellular	55
716	hsa-mir-125a	Carcinoma, Hepatocellular	55
717	hsa-mir-125b	Carcinoma, Hepatocellular	55
718	hsa-mir-126	Carcinoma, Hepatocellular	55
719	hsa-mir-127	Carcinoma, Hepatocellular	55
720	hsa-mir-1271	Carcinoma, Hepatocellular	55
721	hsa-mir-129	Carcinoma, Hepatocellular	55
722	hsa-mir-1290	Carcinoma, Hepatocellular	55
723	hsa-mir-1301	Carcinoma, Hepatocellular	55
724	hsa-mir-1303	Carcinoma, Hepatocellular	55
725	hsa-mir-130a	Carcinoma, Hepatocellular	55
726	hsa-mir-130b	Carcinoma, Hepatocellular	55
727	hsa-mir-133b	Carcinoma, Hepatocellular	55
728	hsa-mir-134	Carcinoma, Hepatocellular	55
729	hsa-mir-135a	Carcinoma, Hepatocellular	55
730	hsa-mir-138	Carcinoma, Hepatocellular	55
731	hsa-mir-139	Carcinoma, Hepatocellular	55
732	hsa-mir-140	Carcinoma, Hepatocellular	55
733	hsa-mir-141	Carcinoma, Hepatocellular	55
734	hsa-mir-142	Carcinoma, Hepatocellular	55
735	hsa-mir-144	Carcinoma, Hepatocellular	55
736	hsa-mir-145	Carcinoma, Hepatocellular	55
737	hsa-mir-146a	Carcinoma, Hepatocellular	55
738	hsa-mir-146b	Carcinoma, Hepatocellular	55
739	hsa-mir-147a	Carcinoma, Hepatocellular	55
740	hsa-mir-148a	Carcinoma, Hepatocellular	55
741	hsa-mir-148b	Carcinoma, Hepatocellular	55
742	hsa-mir-150	Carcinoma, Hepatocellular	55
743	hsa-mir-151a	Carcinoma, Hepatocellular	55
744	hsa-mir-152	Carcinoma, Hepatocellular	55
745	hsa-mir-155	Carcinoma, Hepatocellular	55
746	hsa-mir-15a	Carcinoma, Hepatocellular	55
747	hsa-mir-15b	Carcinoma, Hepatocellular	55
748	hsa-mir-16	Carcinoma, Hepatocellular	55
749	hsa-mir-17	Carcinoma, Hepatocellular	55
750	hsa-mir-181a	Carcinoma, Hepatocellular	55
751	hsa-mir-181b	Carcinoma, Hepatocellular	55
752	hsa-mir-181c	Carcinoma, Hepatocellular	55
753	hsa-mir-181d	Carcinoma, Hepatocellular	55
754	hsa-mir-182	Carcinoma, Hepatocellular	55
755	hsa-mir-183	Carcinoma, Hepatocellular	55
756	hsa-mir-187	Carcinoma, Hepatocellular	55
757	hsa-mir-18a	Carcinoma, Hepatocellular	55
758	hsa-mir-18b	Carcinoma, Hepatocellular	55
759	hsa-mir-190a	Carcinoma, Hepatocellular	55
760	hsa-mir-191	Carcinoma, Hepatocellular	55
761	hsa-mir-192	Carcinoma, Hepatocellular	55
762	hsa-mir-193a	Carcinoma, Hepatocellular	55
763	hsa-mir-195	Carcinoma, Hepatocellular	55
764	hsa-mir-196a	Carcinoma, Hepatocellular	55
765	hsa-mir-197	Carcinoma, Hepatocellular	55
766	hsa-mir-198	Carcinoma, Hepatocellular	55
767	hsa-mir-199a	Carcinoma, Hepatocellular	55
768	hsa-mir-199b	Carcinoma, Hepatocellular	55
769	hsa-mir-19a	Carcinoma, Hepatocellular	55
770	hsa-mir-19b	Carcinoma, Hepatocellular	55
771	hsa-mir-200a	Carcinoma, Hepatocellular	55
772	hsa-mir-200b	Carcinoma, Hepatocellular	55
773	hsa-mir-200c	Carcinoma, Hepatocellular	55
774	hsa-mir-202	Carcinoma, Hepatocellular	55
775	hsa-mir-205	Carcinoma, Hepatocellular	55
776	hsa-mir-208a	Carcinoma, Hepatocellular	55
777	hsa-mir-208b	Carcinoma, Hepatocellular	55
778	hsa-mir-20a	Carcinoma, Hepatocellular	55
779	hsa-mir-20b	Carcinoma, Hepatocellular	55
780	hsa-mir-21	Carcinoma, Hepatocellular	55
781	hsa-mir-210	Carcinoma, Hepatocellular	55
782	hsa-mir-2110	Carcinoma, Hepatocellular	55
783	hsa-mir-212	Carcinoma, Hepatocellular	55
784	hsa-mir-214	Carcinoma, Hepatocellular	55
785	hsa-mir-216a	Carcinoma, Hepatocellular	55
786	hsa-mir-217	Carcinoma, Hepatocellular	55
787	hsa-mir-218	Carcinoma, Hepatocellular	55
788	hsa-mir-22	Carcinoma, Hepatocellular	55
789	hsa-mir-221	Carcinoma, Hepatocellular	55
790	hsa-mir-222	Carcinoma, Hepatocellular	55
791	hsa-mir-223	Carcinoma, Hepatocellular	55
792	hsa-mir-224	Carcinoma, Hepatocellular	55
793	hsa-mir-23a	Carcinoma, Hepatocellular	55
794	hsa-mir-24	Carcinoma, Hepatocellular	55
795	hsa-mir-25	Carcinoma, Hepatocellular	55
796	hsa-mir-26a	Carcinoma, Hepatocellular	55
797	hsa-mir-27a	Carcinoma, Hepatocellular	55
798	hsa-mir-296	Carcinoma, Hepatocellular	55
799	hsa-mir-29a	Carcinoma, Hepatocellular	55
800	hsa-mir-29b	Carcinoma, Hepatocellular	55
801	hsa-mir-29c	Carcinoma, Hepatocellular	55
802	hsa-mir-301a	Carcinoma, Hepatocellular	55
803	hsa-mir-302b	Carcinoma, Hepatocellular	55
804	hsa-mir-302c	Carcinoma, Hepatocellular	55
805	hsa-mir-30a	Carcinoma, Hepatocellular	55
806	hsa-mir-30b	Carcinoma, Hepatocellular	55
807	hsa-mir-30c	Carcinoma, Hepatocellular	55
808	hsa-mir-30d	Carcinoma, Hepatocellular	55
809	hsa-mir-31	Carcinoma, Hepatocellular	55
810	hsa-mir-320a	Carcinoma, Hepatocellular	55
811	hsa-mir-320b	Carcinoma, Hepatocellular	55
812	hsa-mir-320c	Carcinoma, Hepatocellular	55
813	hsa-mir-320d	Carcinoma, Hepatocellular	55
814	hsa-mir-320e	Carcinoma, Hepatocellular	55
815	hsa-mir-323b	Carcinoma, Hepatocellular	55
816	hsa-mir-324	Carcinoma, Hepatocellular	55
817	hsa-mir-326	Carcinoma, Hepatocellular	55
818	hsa-mir-330	Carcinoma, Hepatocellular	55
819	hsa-mir-335	Carcinoma, Hepatocellular	55
820	hsa-mir-338	Carcinoma, Hepatocellular	55
821	hsa-mir-345	Carcinoma, Hepatocellular	55
822	hsa-mir-346	Carcinoma, Hepatocellular	55
823	hsa-mir-34a	Carcinoma, Hepatocellular	55
824	hsa-mir-34c	Carcinoma, Hepatocellular	55
825	hsa-mir-361	Carcinoma, Hepatocellular	55
826	hsa-mir-362	Carcinoma, Hepatocellular	55
827	hsa-mir-365a	Carcinoma, Hepatocellular	55
828	hsa-mir-365b	Carcinoma, Hepatocellular	55
829	hsa-mir-370	Carcinoma, Hepatocellular	55
830	hsa-mir-372	Carcinoma, Hepatocellular	55
831	hsa-mir-373	Carcinoma, Hepatocellular	55
832	hsa-mir-375	Carcinoma, Hepatocellular	55
833	hsa-mir-376a	Carcinoma, Hepatocellular	55
834	hsa-mir-378a	Carcinoma, Hepatocellular	55
835	hsa-mir-379	Carcinoma, Hepatocellular	55
836	hsa-mir-381	Carcinoma, Hepatocellular	55
837	hsa-mir-409	Carcinoma, Hepatocellular	55
838	hsa-mir-421	Carcinoma, Hepatocellular	55
839	hsa-mir-423	Carcinoma, Hepatocellular	55
840	hsa-mir-425	Carcinoma, Hepatocellular	55
841	hsa-mir-432	Carcinoma, Hepatocellular	55
842	hsa-mir-449b	Carcinoma, Hepatocellular	55
843	hsa-mir-450a	Carcinoma, Hepatocellular	55
844	hsa-mir-450b	Carcinoma, Hepatocellular	55
845	hsa-mir-451a	Carcinoma, Hepatocellular	55
846	hsa-mir-483	Carcinoma, Hepatocellular	55
847	hsa-mir-484	Carcinoma, Hepatocellular	55
848	hsa-mir-485	Carcinoma, Hepatocellular	55
849	hsa-mir-489	Carcinoma, Hepatocellular	55
850	hsa-mir-490	Carcinoma, Hepatocellular	55
851	hsa-mir-491	Carcinoma, Hepatocellular	55
852	hsa-mir-492	Carcinoma, Hepatocellular	55
853	hsa-mir-493	Carcinoma, Hepatocellular	55
854	hsa-mir-497	Carcinoma, Hepatocellular	55
855	hsa-mir-498	Carcinoma, Hepatocellular	55
856	hsa-mir-499a	Carcinoma, Hepatocellular	55
857	hsa-mir-499b	Carcinoma, Hepatocellular	55
858	hsa-mir-500a	Carcinoma, Hepatocellular	55
859	hsa-mir-500b	Carcinoma, Hepatocellular	55
860	hsa-mir-502	Carcinoma, Hepatocellular	55
861	hsa-mir-503	Carcinoma, Hepatocellular	55
862	hsa-mir-508	Carcinoma, Hepatocellular	55
863	hsa-mir-512	Carcinoma, Hepatocellular	55
864	hsa-mir-517a	Carcinoma, Hepatocellular	55
865	hsa-mir-517c	Carcinoma, Hepatocellular	55
866	hsa-mir-518b	Carcinoma, Hepatocellular	55
867	hsa-mir-519d	Carcinoma, Hepatocellular	55
868	hsa-mir-519e	Carcinoma, Hepatocellular	55
869	hsa-mir-520b	Carcinoma, Hepatocellular	55
870	hsa-mir-520d	Carcinoma, Hepatocellular	55
871	hsa-mir-520e	Carcinoma, Hepatocellular	55
872	hsa-mir-522	Carcinoma, Hepatocellular	55
873	hsa-mir-526a	Carcinoma, Hepatocellular	55
874	hsa-mir-526b	Carcinoma, Hepatocellular	55
875	hsa-mir-527	Carcinoma, Hepatocellular	55
876	hsa-mir-532	Carcinoma, Hepatocellular	55
877	hsa-mir-542	Carcinoma, Hepatocellular	55
878	hsa-mir-550a	Carcinoma, Hepatocellular	55
879	hsa-mir-590	Carcinoma, Hepatocellular	55
880	hsa-mir-602	Carcinoma, Hepatocellular	55
881	hsa-mir-608	Carcinoma, Hepatocellular	55
882	hsa-mir-612	Carcinoma, Hepatocellular	55
883	hsa-mir-615	Carcinoma, Hepatocellular	55
884	hsa-mir-629	Carcinoma, Hepatocellular	55
885	hsa-mir-636	Carcinoma, Hepatocellular	55
886	hsa-mir-637	Carcinoma, Hepatocellular	55
887	hsa-mir-650	Carcinoma, Hepatocellular	55
888	hsa-mir-657	Carcinoma, Hepatocellular	55
889	hsa-mir-7	Carcinoma, Hepatocellular	55
890	hsa-mir-744	Carcinoma, Hepatocellular	55
891	hsa-mir-765	Carcinoma, Hepatocellular	55
892	hsa-mir-92a	Carcinoma, Hepatocellular	55
893	hsa-mir-92b	Carcinoma, Hepatocellular	55
894	hsa-mir-93	Carcinoma, Hepatocellular	55
895	hsa-mir-96	Carcinoma, Hepatocellular	55
896	hsa-mir-98	Carcinoma, Hepatocellular	55
897	hsa-mir-99a	Carcinoma, Hepatocellular	55
898	hsa-mir-99b	Carcinoma, Hepatocellular	55
899	hsa-mir-155	Carcinoma, Neuroendocrine	56
900	hsa-mir-21	Carcinoma, Neuroendocrine	56
901	hsa-let-7a	Carcinoma, Non-Small-Cell Lung	57
902	hsa-let-7b	Carcinoma, Non-Small-Cell Lung	57
903	hsa-let-7d	Carcinoma, Non-Small-Cell Lung	57
904	hsa-let-7g	Carcinoma, Non-Small-Cell Lung	57
905	hsa-mir-1	Carcinoma, Non-Small-Cell Lung	57
906	hsa-mir-100	Carcinoma, Non-Small-Cell Lung	57
907	hsa-mir-101	Carcinoma, Non-Small-Cell Lung	57
908	hsa-mir-106a	Carcinoma, Non-Small-Cell Lung	57
909	hsa-mir-10a	Carcinoma, Non-Small-Cell Lung	57
910	hsa-mir-124	Carcinoma, Non-Small-Cell Lung	57
911	hsa-mir-1254	Carcinoma, Non-Small-Cell Lung	57
912	hsa-mir-1258	Carcinoma, Non-Small-Cell Lung	57
913	hsa-mir-125a	Carcinoma, Non-Small-Cell Lung	57
914	hsa-mir-125b	Carcinoma, Non-Small-Cell Lung	57
915	hsa-mir-126	Carcinoma, Non-Small-Cell Lung	57
916	hsa-mir-130a	Carcinoma, Non-Small-Cell Lung	57
917	hsa-mir-133b	Carcinoma, Non-Small-Cell Lung	57
918	hsa-mir-134	Carcinoma, Non-Small-Cell Lung	57
919	hsa-mir-135a	Carcinoma, Non-Small-Cell Lung	57
920	hsa-mir-135b	Carcinoma, Non-Small-Cell Lung	57
921	hsa-mir-138	Carcinoma, Non-Small-Cell Lung	57
922	hsa-mir-143	Carcinoma, Non-Small-Cell Lung	57
923	hsa-mir-145	Carcinoma, Non-Small-Cell Lung	57
924	hsa-mir-146a	Carcinoma, Non-Small-Cell Lung	57
925	hsa-mir-146b	Carcinoma, Non-Small-Cell Lung	57
926	hsa-mir-148a	Carcinoma, Non-Small-Cell Lung	57
927	hsa-mir-149	Carcinoma, Non-Small-Cell Lung	57
928	hsa-mir-150	Carcinoma, Non-Small-Cell Lung	57
929	hsa-mir-151a	Carcinoma, Non-Small-Cell Lung	57
930	hsa-mir-151b	Carcinoma, Non-Small-Cell Lung	57
931	hsa-mir-155	Carcinoma, Non-Small-Cell Lung	57
932	hsa-mir-15a	Carcinoma, Non-Small-Cell Lung	57
933	hsa-mir-15b	Carcinoma, Non-Small-Cell Lung	57
934	hsa-mir-16	Carcinoma, Non-Small-Cell Lung	57
935	hsa-mir-17	Carcinoma, Non-Small-Cell Lung	57
936	hsa-mir-181a	Carcinoma, Non-Small-Cell Lung	57
937	hsa-mir-182	Carcinoma, Non-Small-Cell Lung	57
938	hsa-mir-183	Carcinoma, Non-Small-Cell Lung	57
939	hsa-mir-186	Carcinoma, Non-Small-Cell Lung	57
940	hsa-mir-193a	Carcinoma, Non-Small-Cell Lung	57
941	hsa-mir-193b	Carcinoma, Non-Small-Cell Lung	57
942	hsa-mir-196a	Carcinoma, Non-Small-Cell Lung	57
943	hsa-mir-199a	Carcinoma, Non-Small-Cell Lung	57
944	hsa-mir-199b	Carcinoma, Non-Small-Cell Lung	57
945	hsa-mir-200b	Carcinoma, Non-Small-Cell Lung	57
946	hsa-mir-200c	Carcinoma, Non-Small-Cell Lung	57
947	hsa-mir-205	Carcinoma, Non-Small-Cell Lung	57
948	hsa-mir-21	Carcinoma, Non-Small-Cell Lung	57
949	hsa-mir-210	Carcinoma, Non-Small-Cell Lung	57
950	hsa-mir-212	Carcinoma, Non-Small-Cell Lung	57
951	hsa-mir-214	Carcinoma, Non-Small-Cell Lung	57
952	hsa-mir-218	Carcinoma, Non-Small-Cell Lung	57
953	hsa-mir-221	Carcinoma, Non-Small-Cell Lung	57
954	hsa-mir-222	Carcinoma, Non-Small-Cell Lung	57
955	hsa-mir-223	Carcinoma, Non-Small-Cell Lung	57
956	hsa-mir-27a	Carcinoma, Non-Small-Cell Lung	57
957	hsa-mir-27b	Carcinoma, Non-Small-Cell Lung	57
958	hsa-mir-29b	Carcinoma, Non-Small-Cell Lung	57
959	hsa-mir-29c	Carcinoma, Non-Small-Cell Lung	57
960	hsa-mir-30a	Carcinoma, Non-Small-Cell Lung	57
961	hsa-mir-30d	Carcinoma, Non-Small-Cell Lung	57
962	hsa-mir-30e	Carcinoma, Non-Small-Cell Lung	57
963	hsa-mir-328	Carcinoma, Non-Small-Cell Lung	57
964	hsa-mir-337	Carcinoma, Non-Small-Cell Lung	57
965	hsa-mir-345	Carcinoma, Non-Small-Cell Lung	57
966	hsa-mir-34a	Carcinoma, Non-Small-Cell Lung	57
967	hsa-mir-34b	Carcinoma, Non-Small-Cell Lung	57
968	hsa-mir-34c	Carcinoma, Non-Small-Cell Lung	57
969	hsa-mir-361	Carcinoma, Non-Small-Cell Lung	57
970	hsa-mir-374a	Carcinoma, Non-Small-Cell Lung	57
971	hsa-mir-378a	Carcinoma, Non-Small-Cell Lung	57
972	hsa-mir-3940	Carcinoma, Non-Small-Cell Lung	57
973	hsa-mir-424	Carcinoma, Non-Small-Cell Lung	57
974	hsa-mir-429	Carcinoma, Non-Small-Cell Lung	57
975	hsa-mir-449a	Carcinoma, Non-Small-Cell Lung	57
976	hsa-mir-449b	Carcinoma, Non-Small-Cell Lung	57
977	hsa-mir-451a	Carcinoma, Non-Small-Cell Lung	57
978	hsa-mir-451b	Carcinoma, Non-Small-Cell Lung	57
979	hsa-mir-485	Carcinoma, Non-Small-Cell Lung	57
980	hsa-mir-497	Carcinoma, Non-Small-Cell Lung	57
981	hsa-mir-499a	Carcinoma, Non-Small-Cell Lung	57
982	hsa-mir-520a	Carcinoma, Non-Small-Cell Lung	57
983	hsa-mir-520b	Carcinoma, Non-Small-Cell Lung	57
984	hsa-mir-520c	Carcinoma, Non-Small-Cell Lung	57
985	hsa-mir-520d	Carcinoma, Non-Small-Cell Lung	57
986	hsa-mir-520e	Carcinoma, Non-Small-Cell Lung	57
987	hsa-mir-574	Carcinoma, Non-Small-Cell Lung	57
988	hsa-mir-625	Carcinoma, Non-Small-Cell Lung	57
989	hsa-mir-7	Carcinoma, Non-Small-Cell Lung	57
990	hsa-mir-708	Carcinoma, Non-Small-Cell Lung	57
991	hsa-mir-9	Carcinoma, Non-Small-Cell Lung	57
992	hsa-mir-93	Carcinoma, Non-Small-Cell Lung	57
993	hsa-mir-96	Carcinoma, Non-Small-Cell Lung	57
994	hsa-mir-98	Carcinoma, Non-Small-Cell Lung	57
995	hsa-let-7a	Carcinoma, Renal Cell	58
996	hsa-let-7b	Carcinoma, Renal Cell	58
997	hsa-let-7c	Carcinoma, Renal Cell	58
998	hsa-let-7d	Carcinoma, Renal Cell	58
999	hsa-let-7e	Carcinoma, Renal Cell	58
1000	hsa-let-7f	Carcinoma, Renal Cell	58
1001	hsa-let-7g	Carcinoma, Renal Cell	58
1002	hsa-let-7i	Carcinoma, Renal Cell	58
1003	hsa-mir-100	Carcinoma, Renal Cell	58
1004	hsa-mir-101	Carcinoma, Renal Cell	58
1005	hsa-mir-106b	Carcinoma, Renal Cell	58
1006	hsa-mir-10b	Carcinoma, Renal Cell	58
1007	hsa-mir-122	Carcinoma, Renal Cell	58
1008	hsa-mir-1233	Carcinoma, Renal Cell	58
1009	hsa-mir-124	Carcinoma, Renal Cell	58
1010	hsa-mir-126	Carcinoma, Renal Cell	58
1011	hsa-mir-127	Carcinoma, Renal Cell	58
1012	hsa-mir-1285	Carcinoma, Renal Cell	58
1013	hsa-mir-129	Carcinoma, Renal Cell	58
1014	hsa-mir-1290	Carcinoma, Renal Cell	58
1015	hsa-mir-130b	Carcinoma, Renal Cell	58
1016	hsa-mir-134	Carcinoma, Renal Cell	58
1017	hsa-mir-135a	Carcinoma, Renal Cell	58
1018	hsa-mir-138	Carcinoma, Renal Cell	58
1019	hsa-mir-139	Carcinoma, Renal Cell	58
1020	hsa-mir-141	Carcinoma, Renal Cell	58
1021	hsa-mir-142	Carcinoma, Renal Cell	58
1022	hsa-mir-143	Carcinoma, Renal Cell	58
1023	hsa-mir-144	Carcinoma, Renal Cell	58
1024	hsa-mir-145	Carcinoma, Renal Cell	58
1025	hsa-mir-146a	Carcinoma, Renal Cell	58
1026	hsa-mir-146b	Carcinoma, Renal Cell	58
1027	hsa-mir-150	Carcinoma, Renal Cell	58
1028	hsa-mir-151a	Carcinoma, Renal Cell	58
1029	hsa-mir-151b	Carcinoma, Renal Cell	58
1030	hsa-mir-155	Carcinoma, Renal Cell	58
1031	hsa-mir-16	Carcinoma, Renal Cell	58
1032	hsa-mir-184	Carcinoma, Renal Cell	58
1033	hsa-mir-195	Carcinoma, Renal Cell	58
1034	hsa-mir-196a	Carcinoma, Renal Cell	58
1035	hsa-mir-199a	Carcinoma, Renal Cell	58
1036	hsa-mir-199b	Carcinoma, Renal Cell	58
1037	hsa-mir-19a	Carcinoma, Renal Cell	58
1038	hsa-mir-200a	Carcinoma, Renal Cell	58
1039	hsa-mir-200b	Carcinoma, Renal Cell	58
1040	hsa-mir-200c	Carcinoma, Renal Cell	58
1041	hsa-mir-204	Carcinoma, Renal Cell	58
1042	hsa-mir-205	Carcinoma, Renal Cell	58
1043	hsa-mir-206	Carcinoma, Renal Cell	58
1044	hsa-mir-21	Carcinoma, Renal Cell	58
1045	hsa-mir-210	Carcinoma, Renal Cell	58
1046	hsa-mir-215	Carcinoma, Renal Cell	58
1047	hsa-mir-218	Carcinoma, Renal Cell	58
1048	hsa-mir-224	Carcinoma, Renal Cell	58
1049	hsa-mir-23b	Carcinoma, Renal Cell	58
1050	hsa-mir-26a	Carcinoma, Renal Cell	58
1051	hsa-mir-26b	Carcinoma, Renal Cell	58
1052	hsa-mir-27a	Carcinoma, Renal Cell	58
1053	hsa-mir-29c	Carcinoma, Renal Cell	58
1054	hsa-mir-302b	Carcinoma, Renal Cell	58
1055	hsa-mir-302c	Carcinoma, Renal Cell	58
1056	hsa-mir-30c	Carcinoma, Renal Cell	58
1057	hsa-mir-30d	Carcinoma, Renal Cell	58
1058	hsa-mir-320a	Carcinoma, Renal Cell	58
1059	hsa-mir-320b	Carcinoma, Renal Cell	58
1060	hsa-mir-335	Carcinoma, Renal Cell	58
1061	hsa-mir-339	Carcinoma, Renal Cell	58
1062	hsa-mir-34a	Carcinoma, Renal Cell	58
1063	hsa-mir-34b	Carcinoma, Renal Cell	58
1064	hsa-mir-34c	Carcinoma, Renal Cell	58
1065	hsa-mir-363	Carcinoma, Renal Cell	58
1066	hsa-mir-365a	Carcinoma, Renal Cell	58
1067	hsa-mir-365b	Carcinoma, Renal Cell	58
1068	hsa-mir-367	Carcinoma, Renal Cell	58
1069	hsa-mir-378a	Carcinoma, Renal Cell	58
1070	hsa-mir-378b	Carcinoma, Renal Cell	58
1071	hsa-mir-378c	Carcinoma, Renal Cell	58
1072	hsa-mir-378d	Carcinoma, Renal Cell	58
1073	hsa-mir-378e	Carcinoma, Renal Cell	58
1074	hsa-mir-378f	Carcinoma, Renal Cell	58
1075	hsa-mir-378g	Carcinoma, Renal Cell	58
1076	hsa-mir-378h	Carcinoma, Renal Cell	58
1077	hsa-mir-378i	Carcinoma, Renal Cell	58
1078	hsa-mir-381	Carcinoma, Renal Cell	58
1079	hsa-mir-425	Carcinoma, Renal Cell	58
1080	hsa-mir-429	Carcinoma, Renal Cell	58
1081	hsa-mir-451a	Carcinoma, Renal Cell	58
1082	hsa-mir-452	Carcinoma, Renal Cell	58
1083	hsa-mir-454	Carcinoma, Renal Cell	58
1084	hsa-mir-508	Carcinoma, Renal Cell	58
1085	hsa-mir-509	Carcinoma, Renal Cell	58
1086	hsa-mir-514a	Carcinoma, Renal Cell	58
1087	hsa-mir-571	Carcinoma, Renal Cell	58
1088	hsa-mir-625	Carcinoma, Renal Cell	58
1089	hsa-mir-629	Carcinoma, Renal Cell	58
1090	hsa-mir-655	Carcinoma, Renal Cell	58
1091	hsa-mir-7	Carcinoma, Renal Cell	58
1092	hsa-mir-708	Carcinoma, Renal Cell	58
1093	hsa-mir-760	Carcinoma, Renal Cell	58
1094	hsa-mir-9	Carcinoma, Renal Cell	58
1095	hsa-mir-92a	Carcinoma, Renal Cell	58
1096	hsa-mir-93	Carcinoma, Renal Cell	58
1097	hsa-mir-99a	Carcinoma, Renal Cell	58
1098	hsa-mir-99b	Carcinoma, Renal Cell	58
1099	hsa-let-7c	Carcinoma, Small Cell	59
1100	hsa-mir-100	Carcinoma, Small Cell	59
1101	hsa-mir-125b	Carcinoma, Small Cell	59
1102	hsa-mir-143	Carcinoma, Small Cell	59
1103	hsa-mir-145	Carcinoma, Small Cell	59
1104	hsa-mir-1827	Carcinoma, Small Cell	59
1105	hsa-mir-199a	Carcinoma, Small Cell	59
1106	hsa-mir-21	Carcinoma, Small Cell	59
1107	hsa-mir-29b	Carcinoma, Small Cell	59
1108	hsa-mir-34a	Carcinoma, Small Cell	59
1109	hsa-let-7d	Carcinoma, Squamous Cell	60
1110	hsa-let-7i	Carcinoma, Squamous Cell	60
1111	hsa-mir-1	Carcinoma, Squamous Cell	60
1112	hsa-mir-100	Carcinoma, Squamous Cell	60
1113	hsa-mir-101	Carcinoma, Squamous Cell	60
1114	hsa-mir-106a	Carcinoma, Squamous Cell	60
1115	hsa-mir-106b	Carcinoma, Squamous Cell	60
1116	hsa-mir-10a	Carcinoma, Squamous Cell	60
1117	hsa-mir-10b	Carcinoma, Squamous Cell	60
1118	hsa-mir-124	Carcinoma, Squamous Cell	60
1119	hsa-mir-125a	Carcinoma, Squamous Cell	60
1120	hsa-mir-125b	Carcinoma, Squamous Cell	60
1121	hsa-mir-126	Carcinoma, Squamous Cell	60
1122	hsa-mir-129	Carcinoma, Squamous Cell	60
1123	hsa-mir-130a	Carcinoma, Squamous Cell	60
1124	hsa-mir-133a	Carcinoma, Squamous Cell	60
1125	hsa-mir-133b	Carcinoma, Squamous Cell	60
1126	hsa-mir-137	Carcinoma, Squamous Cell	60
1127	hsa-mir-138	Carcinoma, Squamous Cell	60
1128	hsa-mir-140	Carcinoma, Squamous Cell	60
1129	hsa-mir-142	Carcinoma, Squamous Cell	60
1130	hsa-mir-143	Carcinoma, Squamous Cell	60
1131	hsa-mir-145	Carcinoma, Squamous Cell	60
1132	hsa-mir-146a	Carcinoma, Squamous Cell	60
1133	hsa-mir-148a	Carcinoma, Squamous Cell	60
1134	hsa-mir-155	Carcinoma, Squamous Cell	60
1135	hsa-mir-15a	Carcinoma, Squamous Cell	60
1136	hsa-mir-16	Carcinoma, Squamous Cell	60
1137	hsa-mir-181a	Carcinoma, Squamous Cell	60
1138	hsa-mir-181b	Carcinoma, Squamous Cell	60
1139	hsa-mir-181d	Carcinoma, Squamous Cell	60
1140	hsa-mir-182	Carcinoma, Squamous Cell	60
1141	hsa-mir-184	Carcinoma, Squamous Cell	60
1142	hsa-mir-185	Carcinoma, Squamous Cell	60
1143	hsa-mir-18a	Carcinoma, Squamous Cell	60
1144	hsa-mir-18b	Carcinoma, Squamous Cell	60
1145	hsa-mir-193a	Carcinoma, Squamous Cell	60
1146	hsa-mir-195	Carcinoma, Squamous Cell	60
1147	hsa-mir-197	Carcinoma, Squamous Cell	60
1148	hsa-mir-19b	Carcinoma, Squamous Cell	60
1149	hsa-mir-200c	Carcinoma, Squamous Cell	60
1150	hsa-mir-205	Carcinoma, Squamous Cell	60
1151	hsa-mir-20a	Carcinoma, Squamous Cell	60
1152	hsa-mir-20b	Carcinoma, Squamous Cell	60
1153	hsa-mir-21	Carcinoma, Squamous Cell	60
1154	hsa-mir-210	Carcinoma, Squamous Cell	60
1155	hsa-mir-211	Carcinoma, Squamous Cell	60
1156	hsa-mir-214	Carcinoma, Squamous Cell	60
1157	hsa-mir-218	Carcinoma, Squamous Cell	60
1158	hsa-mir-222	Carcinoma, Squamous Cell	60
1159	hsa-mir-223	Carcinoma, Squamous Cell	60
1160	hsa-mir-24	Carcinoma, Squamous Cell	60
1161	hsa-mir-27a	Carcinoma, Squamous Cell	60
1162	hsa-mir-27b	Carcinoma, Squamous Cell	60
1163	hsa-mir-296	Carcinoma, Squamous Cell	60
1164	hsa-mir-29c	Carcinoma, Squamous Cell	60
1165	hsa-mir-30a	Carcinoma, Squamous Cell	60
1166	hsa-mir-30d	Carcinoma, Squamous Cell	60
1167	hsa-mir-31	Carcinoma, Squamous Cell	60
1168	hsa-mir-34a	Carcinoma, Squamous Cell	60
1169	hsa-mir-34b	Carcinoma, Squamous Cell	60
1170	hsa-mir-34c	Carcinoma, Squamous Cell	60
1171	hsa-mir-363	Carcinoma, Squamous Cell	60
1172	hsa-mir-375	Carcinoma, Squamous Cell	60
1173	hsa-mir-421	Carcinoma, Squamous Cell	60
1174	hsa-mir-423	Carcinoma, Squamous Cell	60
1175	hsa-mir-489	Carcinoma, Squamous Cell	60
1176	hsa-mir-497	Carcinoma, Squamous Cell	60
1177	hsa-mir-499a	Carcinoma, Squamous Cell	60
1178	hsa-mir-499b	Carcinoma, Squamous Cell	60
1179	hsa-mir-504	Carcinoma, Squamous Cell	60
1180	hsa-mir-519a	Carcinoma, Squamous Cell	60
1181	hsa-mir-542	Carcinoma, Squamous Cell	60
1182	hsa-mir-661	Carcinoma, Squamous Cell	60
1183	hsa-mir-874	Carcinoma, Squamous Cell	60
1184	hsa-mir-885	Carcinoma, Squamous Cell	60
1185	hsa-mir-9	Carcinoma, Squamous Cell	60
1186	hsa-mir-92a	Carcinoma, Squamous Cell	60
1187	hsa-mir-1	Cardiomegaly	61
1188	hsa-mir-133a	Cardiomegaly	61
1189	hsa-mir-150	Cardiomegaly	61
1190	hsa-mir-199a	Cardiomegaly	61
1191	hsa-mir-208a	Cardiomegaly	61
1192	hsa-mir-378a	Cardiomegaly	61
1193	hsa-mir-199a	Cardiomyopathies	62
1194	hsa-mir-199b	Cardiomyopathies	62
1195	hsa-mir-21	Cardiomyopathies	62
1196	hsa-mir-214	Cardiomyopathies	62
1197	hsa-mir-27a	Cardiomyopathies	62
1198	hsa-let-7i	Cardiomyopathy, Dilated	63
1199	hsa-mir-126	Cardiomyopathy, Dilated	63
1200	hsa-mir-155	Cardiomyopathy, Dilated	63
1201	hsa-mir-196a	Cardiomyopathy, Dilated	63
1202	hsa-mir-21	Cardiomyopathy, Dilated	63
1203	hsa-mir-499a	Cardiomyopathy, Dilated	63
1204	hsa-mir-1	Cardiomyopathy, Hypertrophic	64
1205	hsa-mir-125b	Cardiomyopathy, Hypertrophic	64
1206	hsa-mir-133a	Cardiomyopathy, Hypertrophic	64
1207	hsa-mir-150	Cardiomyopathy, Hypertrophic	64
1208	hsa-mir-181b	Cardiomyopathy, Hypertrophic	64
1209	hsa-mir-195	Cardiomyopathy, Hypertrophic	64
1210	hsa-mir-199a	Cardiomyopathy, Hypertrophic	64
1211	hsa-mir-208a	Cardiomyopathy, Hypertrophic	64
1212	hsa-mir-21	Cardiomyopathy, Hypertrophic	64
1213	hsa-mir-214	Cardiomyopathy, Hypertrophic	64
1214	hsa-mir-23a	Cardiomyopathy, Hypertrophic	64
1215	hsa-mir-23b	Cardiomyopathy, Hypertrophic	64
1216	hsa-mir-24	Cardiomyopathy, Hypertrophic	64
1217	hsa-mir-27b	Cardiomyopathy, Hypertrophic	64
1218	hsa-mir-9	Cardiomyopathy, Hypertrophic	64
1219	hsa-mir-21	Cardiovascular Diseases	65
1220	hsa-mir-34a	Cardiovascular Diseases	65
1221	hsa-mir-221	Carotid Artery Diseases	66
1222	hsa-mir-222	Carotid Artery Diseases	66
1223	hsa-let-7b	Cataract	67
1224	hsa-mir-134	Central Nervous System Diseases	68
1225	hsa-mir-372	Cerebellar Neoplasms	69
1226	hsa-mir-373	Cerebellar Neoplasms	69
1227	hsa-mir-155	Cerebral Hemorrhage	70
1228	hsa-mir-26a	Cerebral Hemorrhage	70
1229	hsa-mir-298	Cerebral Hemorrhage	70
1230	hsa-mir-362	Cerebral Hemorrhage	70
1231	hsa-mir-124	Cerebral Infarction	71
1232	hsa-mir-146a	Cerebral Infarction	71
1233	hsa-mir-149	Cerebral Infarction	71
1234	hsa-mir-196a	Cerebral Infarction	71
1235	hsa-mir-491	Cerebral Infarction	71
1236	hsa-mir-218	Cervical Intraepithelial Neoplasia	72
1237	hsa-mir-106b	Child Development Disorders, Pervasive	73
1238	hsa-mir-23a	Child Development Disorders, Pervasive	73
1239	hsa-mir-146a	Chlamydia Infections	74
1240	hsa-mir-124	Cholangiocarcinoma	75
1241	hsa-mir-126	Cholangiocarcinoma	75
1242	hsa-mir-141	Cholangiocarcinoma	75
1243	hsa-mir-200b	Cholangiocarcinoma	75
1244	hsa-mir-200c	Cholangiocarcinoma	75
1245	hsa-mir-21	Cholangiocarcinoma	75
1246	hsa-mir-214	Cholangiocarcinoma	75
1247	hsa-mir-25	Cholangiocarcinoma	75
1248	hsa-mir-26a	Cholangiocarcinoma	75
1249	hsa-mir-370	Cholangiocarcinoma	75
1250	hsa-mir-373	Cholangiocarcinoma	75
1251	hsa-mir-494	Cholangiocarcinoma	75
1252	hsa-let-7a	Cholesteatoma	76
1253	hsa-mir-21	Cholesteatoma	76
1254	hsa-mir-221	Cholesteatoma	76
1255	hsa-mir-433	Chondrodysplasia Punctata	77
1256	hsa-mir-1	Chordoma	78
1257	hsa-mir-141	Choriocarcinoma	79
1258	hsa-mir-145	Choriocarcinoma	79
1259	hsa-mir-199b	Choriocarcinoma	79
1260	hsa-mir-34a	Choriocarcinoma	79
1261	hsa-mir-29b	Cicatrix	80
1262	hsa-let-7d	Cocaine-Related Disorders	81
1263	hsa-mir-124	Cocaine-Related Disorders	81
1264	hsa-mir-181a	Cocaine-Related Disorders	81
1265	hsa-mir-212	Cocaine-Related Disorders	81
1266	hsa-mir-155	Colitis	82
1267	hsa-mir-126	Colitis, Ulcerative	83
1268	hsa-mir-143	Colitis, Ulcerative	83
1269	hsa-mir-145	Colitis, Ulcerative	83
1270	hsa-mir-155	Colitis, Ulcerative	83
1271	hsa-mir-21	Colitis, Ulcerative	83
1272	hsa-mir-941	Colitis, Ulcerative	83
1273	hsa-let-7a	Colonic Neoplasms	84
1274	hsa-let-7b	Colonic Neoplasms	84
1275	hsa-let-7c	Colonic Neoplasms	84
1276	hsa-let-7d	Colonic Neoplasms	84
1277	hsa-let-7e	Colonic Neoplasms	84
1278	hsa-let-7f	Colonic Neoplasms	84
1279	hsa-let-7g	Colonic Neoplasms	84
1280	hsa-let-7i	Colonic Neoplasms	84
1281	hsa-mir-1	Colonic Neoplasms	84
1282	hsa-mir-101	Colonic Neoplasms	84
1283	hsa-mir-106a	Colonic Neoplasms	84
1284	hsa-mir-106b	Colonic Neoplasms	84
1285	hsa-mir-107	Colonic Neoplasms	84
1286	hsa-mir-10b	Colonic Neoplasms	84
1287	hsa-mir-125a	Colonic Neoplasms	84
1288	hsa-mir-125b	Colonic Neoplasms	84
1289	hsa-mir-126	Colonic Neoplasms	84
1290	hsa-mir-127	Colonic Neoplasms	84
1291	hsa-mir-128	Colonic Neoplasms	84
1292	hsa-mir-1290	Colonic Neoplasms	84
1293	hsa-mir-132	Colonic Neoplasms	84
1294	hsa-mir-133b	Colonic Neoplasms	84
1295	hsa-mir-137	Colonic Neoplasms	84
1296	hsa-mir-140	Colonic Neoplasms	84
1297	hsa-mir-141	Colonic Neoplasms	84
1298	hsa-mir-142	Colonic Neoplasms	84
1299	hsa-mir-143	Colonic Neoplasms	84
1300	hsa-mir-145	Colonic Neoplasms	84
1301	hsa-mir-146a	Colonic Neoplasms	84
1302	hsa-mir-152	Colonic Neoplasms	84
1303	hsa-mir-155	Colonic Neoplasms	84
1304	hsa-mir-15a	Colonic Neoplasms	84
1305	hsa-mir-16	Colonic Neoplasms	84
1306	hsa-mir-17	Colonic Neoplasms	84
1307	hsa-mir-18a	Colonic Neoplasms	84
1308	hsa-mir-191	Colonic Neoplasms	84
1309	hsa-mir-192	Colonic Neoplasms	84
1310	hsa-mir-19a	Colonic Neoplasms	84
1311	hsa-mir-19b	Colonic Neoplasms	84
1312	hsa-mir-200b	Colonic Neoplasms	84
1313	hsa-mir-200c	Colonic Neoplasms	84
1314	hsa-mir-205	Colonic Neoplasms	84
1315	hsa-mir-20a	Colonic Neoplasms	84
1316	hsa-mir-21	Colonic Neoplasms	84
1317	hsa-mir-218	Colonic Neoplasms	84
1318	hsa-mir-22	Colonic Neoplasms	84
1319	hsa-mir-221	Colonic Neoplasms	84
1320	hsa-mir-223	Colonic Neoplasms	84
1321	hsa-mir-23b	Colonic Neoplasms	84
1322	hsa-mir-24	Colonic Neoplasms	84
1323	hsa-mir-296	Colonic Neoplasms	84
1324	hsa-mir-29a	Colonic Neoplasms	84
1325	hsa-mir-29b	Colonic Neoplasms	84
1326	hsa-mir-302b	Colonic Neoplasms	84
1327	hsa-mir-30a	Colonic Neoplasms	84
1328	hsa-mir-30c	Colonic Neoplasms	84
1329	hsa-mir-31	Colonic Neoplasms	84
1330	hsa-mir-32	Colonic Neoplasms	84
1331	hsa-mir-330	Colonic Neoplasms	84
1332	hsa-mir-34a	Colonic Neoplasms	84
1333	hsa-mir-365a	Colonic Neoplasms	84
1334	hsa-mir-365b	Colonic Neoplasms	84
1335	hsa-mir-424	Colonic Neoplasms	84
1336	hsa-mir-449a	Colonic Neoplasms	84
1337	hsa-mir-493	Colonic Neoplasms	84
1338	hsa-mir-498	Colonic Neoplasms	84
1339	hsa-mir-502	Colonic Neoplasms	84
1340	hsa-mir-506	Colonic Neoplasms	84
1341	hsa-mir-518c	Colonic Neoplasms	84
1342	hsa-mir-552	Colonic Neoplasms	84
1343	hsa-mir-584	Colonic Neoplasms	84
1344	hsa-mir-615	Colonic Neoplasms	84
1345	hsa-mir-622	Colonic Neoplasms	84
1346	hsa-mir-629	Colonic Neoplasms	84
1347	hsa-mir-630	Colonic Neoplasms	84
1348	hsa-mir-9	Colonic Neoplasms	84
1349	hsa-mir-92a	Colonic Neoplasms	84
1350	hsa-let-7a	Colorectal Neoplasms	85
1351	hsa-let-7b	Colorectal Neoplasms	85
1352	hsa-let-7c	Colorectal Neoplasms	85
1353	hsa-let-7e	Colorectal Neoplasms	85
1354	hsa-mir-1	Colorectal Neoplasms	85
1355	hsa-mir-103a	Colorectal Neoplasms	85
1356	hsa-mir-103b	Colorectal Neoplasms	85
1357	hsa-mir-106a	Colorectal Neoplasms	85
1358	hsa-mir-107	Colorectal Neoplasms	85
1359	hsa-mir-10b	Colorectal Neoplasms	85
1360	hsa-mir-1179	Colorectal Neoplasms	85
1361	hsa-mir-122	Colorectal Neoplasms	85
1362	hsa-mir-124	Colorectal Neoplasms	85
1363	hsa-mir-1246	Colorectal Neoplasms	85
1364	hsa-mir-125b	Colorectal Neoplasms	85
1365	hsa-mir-126	Colorectal Neoplasms	85
1366	hsa-mir-127	Colorectal Neoplasms	85
1367	hsa-mir-1273c	Colorectal Neoplasms	85
1368	hsa-mir-1275	Colorectal Neoplasms	85
1369	hsa-mir-129	Colorectal Neoplasms	85
1370	hsa-mir-1303	Colorectal Neoplasms	85
1371	hsa-mir-130a	Colorectal Neoplasms	85
1372	hsa-mir-133a	Colorectal Neoplasms	85
1373	hsa-mir-133b	Colorectal Neoplasms	85
1374	hsa-mir-135a	Colorectal Neoplasms	85
1375	hsa-mir-135b	Colorectal Neoplasms	85
1376	hsa-mir-137	Colorectal Neoplasms	85
1377	hsa-mir-139	Colorectal Neoplasms	85
1378	hsa-mir-140	Colorectal Neoplasms	85
1379	hsa-mir-141	Colorectal Neoplasms	85
1380	hsa-mir-142	Colorectal Neoplasms	85
1381	hsa-mir-143	Colorectal Neoplasms	85
1382	hsa-mir-144	Colorectal Neoplasms	85
1383	hsa-mir-145	Colorectal Neoplasms	85
1384	hsa-mir-146a	Colorectal Neoplasms	85
1385	hsa-mir-146b	Colorectal Neoplasms	85
1386	hsa-mir-147b	Colorectal Neoplasms	85
1387	hsa-mir-148a	Colorectal Neoplasms	85
1388	hsa-mir-148b	Colorectal Neoplasms	85
1389	hsa-mir-149	Colorectal Neoplasms	85
1390	hsa-mir-150	Colorectal Neoplasms	85
1391	hsa-mir-152	Colorectal Neoplasms	85
1392	hsa-mir-155	Colorectal Neoplasms	85
1393	hsa-mir-16	Colorectal Neoplasms	85
1394	hsa-mir-17	Colorectal Neoplasms	85
1395	hsa-mir-181a	Colorectal Neoplasms	85
1396	hsa-mir-181b	Colorectal Neoplasms	85
1397	hsa-mir-182	Colorectal Neoplasms	85
1398	hsa-mir-183	Colorectal Neoplasms	85
1399	hsa-mir-185	Colorectal Neoplasms	85
1400	hsa-mir-186	Colorectal Neoplasms	85
1401	hsa-mir-18a	Colorectal Neoplasms	85
1402	hsa-mir-18b	Colorectal Neoplasms	85
1403	hsa-mir-190a	Colorectal Neoplasms	85
1404	hsa-mir-1915	Colorectal Neoplasms	85
1405	hsa-mir-193a	Colorectal Neoplasms	85
1406	hsa-mir-194	Colorectal Neoplasms	85
1407	hsa-mir-195	Colorectal Neoplasms	85
1408	hsa-mir-196a	Colorectal Neoplasms	85
1409	hsa-mir-199a	Colorectal Neoplasms	85
1410	hsa-mir-199b	Colorectal Neoplasms	85
1411	hsa-mir-19a	Colorectal Neoplasms	85
1412	hsa-mir-19b	Colorectal Neoplasms	85
1413	hsa-mir-200a	Colorectal Neoplasms	85
1414	hsa-mir-200b	Colorectal Neoplasms	85
1415	hsa-mir-200c	Colorectal Neoplasms	85
1416	hsa-mir-206	Colorectal Neoplasms	85
1417	hsa-mir-208a	Colorectal Neoplasms	85
1418	hsa-mir-20a	Colorectal Neoplasms	85
1419	hsa-mir-21	Colorectal Neoplasms	85
1420	hsa-mir-210	Colorectal Neoplasms	85
1421	hsa-mir-211	Colorectal Neoplasms	85
1422	hsa-mir-2110	Colorectal Neoplasms	85
1423	hsa-mir-215	Colorectal Neoplasms	85
1424	hsa-mir-216b	Colorectal Neoplasms	85
1425	hsa-mir-218	Colorectal Neoplasms	85
1426	hsa-mir-22	Colorectal Neoplasms	85
1427	hsa-mir-221	Colorectal Neoplasms	85
1428	hsa-mir-222	Colorectal Neoplasms	85
1429	hsa-mir-224	Colorectal Neoplasms	85
1430	hsa-mir-23a	Colorectal Neoplasms	85
1431	hsa-mir-25	Colorectal Neoplasms	85
1432	hsa-mir-26a	Colorectal Neoplasms	85
1433	hsa-mir-26b	Colorectal Neoplasms	85
1434	hsa-mir-27a	Colorectal Neoplasms	85
1435	hsa-mir-27b	Colorectal Neoplasms	85
1436	hsa-mir-28	Colorectal Neoplasms	85
1437	hsa-mir-297	Colorectal Neoplasms	85
1438	hsa-mir-29a	Colorectal Neoplasms	85
1439	hsa-mir-301a	Colorectal Neoplasms	85
1440	hsa-mir-30a	Colorectal Neoplasms	85
1441	hsa-mir-31	Colorectal Neoplasms	85
1442	hsa-mir-320a	Colorectal Neoplasms	85
1443	hsa-mir-324	Colorectal Neoplasms	85
1444	hsa-mir-328	Colorectal Neoplasms	85
1445	hsa-mir-330	Colorectal Neoplasms	85
1446	hsa-mir-335	Colorectal Neoplasms	85
1447	hsa-mir-337	Colorectal Neoplasms	85
1448	hsa-mir-338	Colorectal Neoplasms	85
1449	hsa-mir-339	Colorectal Neoplasms	85
1450	hsa-mir-33a	Colorectal Neoplasms	85
1451	hsa-mir-340	Colorectal Neoplasms	85
1452	hsa-mir-342	Colorectal Neoplasms	85
1453	hsa-mir-345	Colorectal Neoplasms	85
1454	hsa-mir-34a	Colorectal Neoplasms	85
1455	hsa-mir-34b	Colorectal Neoplasms	85
1456	hsa-mir-34c	Colorectal Neoplasms	85
1457	hsa-mir-362	Colorectal Neoplasms	85
1458	hsa-mir-367	Colorectal Neoplasms	85
1459	hsa-mir-372	Colorectal Neoplasms	85
1460	hsa-mir-373	Colorectal Neoplasms	85
1461	hsa-mir-375	Colorectal Neoplasms	85
1462	hsa-mir-378a	Colorectal Neoplasms	85
1463	hsa-mir-422a	Colorectal Neoplasms	85
1464	hsa-mir-423	Colorectal Neoplasms	85
1465	hsa-mir-429	Colorectal Neoplasms	85
1466	hsa-mir-451a	Colorectal Neoplasms	85
1467	hsa-mir-454	Colorectal Neoplasms	85
1468	hsa-mir-483	Colorectal Neoplasms	85
1469	hsa-mir-491	Colorectal Neoplasms	85
1470	hsa-mir-492	Colorectal Neoplasms	85
1471	hsa-mir-497	Colorectal Neoplasms	85
1472	hsa-mir-499a	Colorectal Neoplasms	85
1473	hsa-mir-520a	Colorectal Neoplasms	85
1474	hsa-mir-542	Colorectal Neoplasms	85
1475	hsa-mir-567	Colorectal Neoplasms	85
1476	hsa-mir-574	Colorectal Neoplasms	85
1477	hsa-mir-584	Colorectal Neoplasms	85
1478	hsa-mir-608	Colorectal Neoplasms	85
1479	hsa-mir-625	Colorectal Neoplasms	85
1480	hsa-mir-638	Colorectal Neoplasms	85
1481	hsa-mir-646	Colorectal Neoplasms	85
1482	hsa-mir-652	Colorectal Neoplasms	85
1483	hsa-mir-7	Colorectal Neoplasms	85
1484	hsa-mir-708	Colorectal Neoplasms	85
1485	hsa-mir-760	Colorectal Neoplasms	85
1486	hsa-mir-9	Colorectal Neoplasms	85
1487	hsa-mir-92a	Colorectal Neoplasms	85
1488	hsa-mir-92b	Colorectal Neoplasms	85
1489	hsa-mir-93	Colorectal Neoplasms	85
1490	hsa-mir-95	Colorectal Neoplasms	85
1491	hsa-mir-96	Colorectal Neoplasms	85
1492	hsa-mir-99a	Colorectal Neoplasms	85
1493	hsa-mir-155	Colorectal Neoplasms, Hereditary Nonpolyposis	86
1494	hsa-mir-1	Coronary Artery Disease	87
1495	hsa-mir-122	Coronary Artery Disease	87
1496	hsa-mir-126	Coronary Artery Disease	87
1497	hsa-mir-130a	Coronary Artery Disease	87
1498	hsa-mir-134	Coronary Artery Disease	87
1499	hsa-mir-181a	Coronary Artery Disease	87
1500	hsa-mir-196a	Coronary Artery Disease	87
1501	hsa-mir-198	Coronary Artery Disease	87
1502	hsa-mir-21	Coronary Artery Disease	87
1503	hsa-mir-221	Coronary Artery Disease	87
1504	hsa-mir-222	Coronary Artery Disease	87
1505	hsa-mir-340	Coronary Artery Disease	87
1506	hsa-mir-34a	Coronary Artery Disease	87
1507	hsa-mir-370	Coronary Artery Disease	87
1508	hsa-mir-499a	Coronary Artery Disease	87
1509	hsa-mir-624	Coronary Artery Disease	87
1510	hsa-mir-92a	Coronary Artery Disease	87
1511	hsa-mir-146a	Creutzfeldt-Jakob Syndrome	88
1512	hsa-let-7e	Crohn Disease	89
1513	hsa-let-7f	Crohn Disease	89
1514	hsa-mir-106a	Crohn Disease	89
1515	hsa-mir-107	Crohn Disease	89
1516	hsa-mir-126	Crohn Disease	89
1517	hsa-mir-16	Crohn Disease	89
1518	hsa-mir-191	Crohn Disease	89
1519	hsa-mir-196a	Crohn Disease	89
1520	hsa-mir-196b	Crohn Disease	89
1521	hsa-mir-199a	Crohn Disease	89
1522	hsa-mir-200b	Crohn Disease	89
1523	hsa-mir-200c	Crohn Disease	89
1524	hsa-mir-23a	Crohn Disease	89
1525	hsa-mir-29a	Crohn Disease	89
1526	hsa-mir-362	Crohn Disease	89
1527	hsa-mir-532	Crohn Disease	89
1528	hsa-mir-155	Cystic Fibrosis	90
1529	hsa-mir-199a	Cystitis, Interstitial	91
1530	hsa-mir-320a	Cystitis, Interstitial	91
1531	hsa-mir-320b	Cystitis, Interstitial	91
1532	hsa-mir-320c	Cystitis, Interstitial	91
1533	hsa-mir-320d	Cystitis, Interstitial	91
1534	hsa-mir-328	Cystitis, Interstitial	91
1535	hsa-mir-449b	Cystitis, Interstitial	91
1536	hsa-mir-500a	Cystitis, Interstitial	91
1537	hsa-mir-132	Dementia	92
1538	hsa-mir-212	Dementia	92
1539	hsa-mir-659	Dementia	92
1540	hsa-mir-155	Demyelinating Diseases	93
1541	hsa-mir-21	Demyelinating Diseases	93
1542	hsa-mir-301a	Demyelinating Diseases	93
1543	hsa-mir-125b	Dermatitis, Atopic	94
1544	hsa-mir-21	Dermatitis, Atopic	94
1545	hsa-mir-155	Diabetes Complications	95
1546	hsa-mir-126	Diabetes Mellitus	96
1547	hsa-mir-146a	Diabetes Mellitus	96
1548	hsa-mir-155	Diabetes Mellitus	96
1549	hsa-mir-21	Diabetes Mellitus	96
1550	hsa-mir-29c	Diabetes Mellitus	96
1551	hsa-mir-301a	Diabetes Mellitus	96
1552	hsa-mir-320a	Diabetes Mellitus	96
1553	hsa-mir-375	Diabetes Mellitus	96
1554	hsa-mir-503	Diabetes Mellitus	96
1555	hsa-mir-326	Diabetes Mellitus, Type 1	97
1556	hsa-mir-103a	Diabetes Mellitus, Type 2	98
1557	hsa-mir-107	Diabetes Mellitus, Type 2	98
1558	hsa-mir-126	Diabetes Mellitus, Type 2	98
1559	hsa-mir-143	Diabetes Mellitus, Type 2	98
1560	hsa-mir-144	Diabetes Mellitus, Type 2	98
1561	hsa-mir-146a	Diabetes Mellitus, Type 2	98
1562	hsa-mir-15a	Diabetes Mellitus, Type 2	98
1563	hsa-mir-191	Diabetes Mellitus, Type 2	98
1564	hsa-mir-197	Diabetes Mellitus, Type 2	98
1565	hsa-mir-20b	Diabetes Mellitus, Type 2	98
1566	hsa-mir-21	Diabetes Mellitus, Type 2	98
1567	hsa-mir-223	Diabetes Mellitus, Type 2	98
1568	hsa-mir-24	Diabetes Mellitus, Type 2	98
1569	hsa-mir-320a	Diabetes Mellitus, Type 2	98
1570	hsa-mir-483	Diabetes Mellitus, Type 2	98
1571	hsa-mir-99a	Diabetes Mellitus, Type 2	98
1572	hsa-mir-192	Diabetic Nephropathies	99
1573	hsa-mir-200a	Diabetic Nephropathies	99
1574	hsa-mir-200b	Diabetic Nephropathies	99
1575	hsa-mir-200c	Diabetic Nephropathies	99
1576	hsa-mir-21	Diabetic Nephropathies	99
1577	hsa-mir-29a	Diabetic Nephropathies	99
1578	hsa-mir-29b	Diabetic Nephropathies	99
1579	hsa-mir-29c	Diabetic Nephropathies	99
1580	hsa-mir-377	Diabetic Nephropathies	99
1581	hsa-mir-451a	Diabetic Nephropathies	99
1582	hsa-mir-200b	Diabetic Retinopathy	100
1583	hsa-let-7a	Digestive System Neoplasms	101
1584	hsa-let-7b	Digestive System Neoplasms	101
1585	hsa-let-7c	Digestive System Neoplasms	101
1586	hsa-let-7d	Digestive System Neoplasms	101
1587	hsa-let-7e	Digestive System Neoplasms	101
1588	hsa-let-7f	Digestive System Neoplasms	101
1589	hsa-let-7g	Digestive System Neoplasms	101
1590	hsa-let-7i	Digestive System Neoplasms	101
1591	hsa-mir-1	Distal Myopathies	102
1592	hsa-mir-133a	Distal Myopathies	102
1593	hsa-mir-206	Distal Myopathies	102
1594	hsa-mir-1246	Down Syndrome	103
1595	hsa-mir-155	Down Syndrome	103
1596	hsa-mir-122	Drug-Induced Liver Injury	104
1597	hsa-mir-192	Drug-Induced Liver Injury	104
1598	hsa-mir-27b	Dyslipidemias	105
1599	hsa-mir-325	Dyspepsia	106
1600	hsa-mir-195	Eclampsia	107
1601	hsa-mir-21	Eclampsia	107
1602	hsa-mir-222	Eclampsia	107
1603	hsa-mir-26b	Eclampsia	107
1604	hsa-mir-335	Eclampsia	107
1605	hsa-mir-146a	Eczema	108
1606	hsa-mir-155	Encephalomyelitis, Autoimmune, Experimental	109
1607	hsa-let-7a	Endometrial Neoplasms	110
1608	hsa-let-7b	Endometrial Neoplasms	110
1609	hsa-let-7c	Endometrial Neoplasms	110
1610	hsa-let-7d	Endometrial Neoplasms	110
1611	hsa-let-7e	Endometrial Neoplasms	110
1612	hsa-let-7f	Endometrial Neoplasms	110
1613	hsa-let-7g	Endometrial Neoplasms	110
1614	hsa-let-7i	Endometrial Neoplasms	110
1615	hsa-mir-1	Endometrial Neoplasms	110
1616	hsa-mir-100	Endometrial Neoplasms	110
1617	hsa-mir-103a	Endometrial Neoplasms	110
1618	hsa-mir-103b	Endometrial Neoplasms	110
1619	hsa-mir-124	Endometrial Neoplasms	110
1620	hsa-mir-125b	Endometrial Neoplasms	110
1621	hsa-mir-130b	Endometrial Neoplasms	110
1622	hsa-mir-141	Endometrial Neoplasms	110
1623	hsa-mir-142	Endometrial Neoplasms	110
1624	hsa-mir-146b	Endometrial Neoplasms	110
1625	hsa-mir-148a	Endometrial Neoplasms	110
1626	hsa-mir-152	Endometrial Neoplasms	110
1627	hsa-mir-153	Endometrial Neoplasms	110
1628	hsa-mir-155	Endometrial Neoplasms	110
1629	hsa-mir-182	Endometrial Neoplasms	110
1630	hsa-mir-183	Endometrial Neoplasms	110
1631	hsa-mir-186	Endometrial Neoplasms	110
1632	hsa-mir-18b	Endometrial Neoplasms	110
1633	hsa-mir-193a	Endometrial Neoplasms	110
1634	hsa-mir-193b	Endometrial Neoplasms	110
1635	hsa-mir-194	Endometrial Neoplasms	110
1636	hsa-mir-199b	Endometrial Neoplasms	110
1637	hsa-mir-200a	Endometrial Neoplasms	110
1638	hsa-mir-200b	Endometrial Neoplasms	110
1639	hsa-mir-200c	Endometrial Neoplasms	110
1640	hsa-mir-204	Endometrial Neoplasms	110
1641	hsa-mir-205	Endometrial Neoplasms	110
1642	hsa-mir-208a	Endometrial Neoplasms	110
1643	hsa-mir-21	Endometrial Neoplasms	110
1644	hsa-mir-210	Endometrial Neoplasms	110
1645	hsa-mir-27a	Endometrial Neoplasms	110
1646	hsa-mir-27b	Endometrial Neoplasms	110
1647	hsa-mir-29c	Endometrial Neoplasms	110
1648	hsa-mir-30c	Endometrial Neoplasms	110
1649	hsa-mir-378a	Endometrial Neoplasms	110
1650	hsa-mir-429	Endometrial Neoplasms	110
1651	hsa-mir-625	Endometrial Neoplasms	110
1652	hsa-mir-633	Endometrial Neoplasms	110
1653	hsa-mir-9	Endometrial Neoplasms	110
1654	hsa-mir-96	Endometrial Neoplasms	110
1655	hsa-mir-99a	Endometrial Neoplasms	110
1656	hsa-let-7a	Endometriosis	111
1657	hsa-let-7b	Endometriosis	111
1658	hsa-let-7c	Endometriosis	111
1659	hsa-let-7d	Endometriosis	111
1660	hsa-let-7e	Endometriosis	111
1661	hsa-let-7f	Endometriosis	111
1662	hsa-let-7g	Endometriosis	111
1663	hsa-let-7i	Endometriosis	111
1664	hsa-mir-1	Endometriosis	111
1665	hsa-mir-100	Endometriosis	111
1666	hsa-mir-10a	Endometriosis	111
1667	hsa-mir-10b	Endometriosis	111
1668	hsa-mir-125a	Endometriosis	111
1669	hsa-mir-125b	Endometriosis	111
1670	hsa-mir-126	Endometriosis	111
1671	hsa-mir-135a	Endometriosis	111
1672	hsa-mir-135b	Endometriosis	111
1673	hsa-mir-141	Endometriosis	111
1674	hsa-mir-142	Endometriosis	111
1675	hsa-mir-143	Endometriosis	111
1676	hsa-mir-145	Endometriosis	111
1677	hsa-mir-150	Endometriosis	111
1678	hsa-mir-17	Endometriosis	111
1679	hsa-mir-193a	Endometriosis	111
1680	hsa-mir-194	Endometriosis	111
1681	hsa-mir-196b	Endometriosis	111
1682	hsa-mir-199a	Endometriosis	111
1683	hsa-mir-200a	Endometriosis	111
1684	hsa-mir-200b	Endometriosis	111
1685	hsa-mir-200c	Endometriosis	111
1686	hsa-mir-202	Endometriosis	111
1687	hsa-mir-20a	Endometriosis	111
1688	hsa-mir-22	Endometriosis	111
1689	hsa-mir-223	Endometriosis	111
1690	hsa-mir-23a	Endometriosis	111
1691	hsa-mir-23b	Endometriosis	111
1692	hsa-mir-29c	Endometriosis	111
1693	hsa-mir-34c	Endometriosis	111
1694	hsa-mir-365a	Endometriosis	111
1695	hsa-mir-365b	Endometriosis	111
1696	hsa-mir-375	Endometriosis	111
1697	hsa-mir-424	Endometriosis	111
1698	hsa-mir-429	Endometriosis	111
1699	hsa-mir-449b	Endometriosis	111
1700	hsa-mir-485	Endometriosis	111
1701	hsa-mir-504	Endometriosis	111
1702	hsa-mir-509	Endometriosis	111
1703	hsa-mir-520a	Endometriosis	111
1704	hsa-mir-520b	Endometriosis	111
1705	hsa-mir-520c	Endometriosis	111
1706	hsa-mir-520d	Endometriosis	111
1707	hsa-mir-520e	Endometriosis	111
1708	hsa-mir-520f	Endometriosis	111
1709	hsa-mir-520g	Endometriosis	111
1710	hsa-mir-520h	Endometriosis	111
1711	hsa-mir-574	Endometriosis	111
1712	hsa-mir-708	Endometriosis	111
1713	hsa-mir-873	Endometriosis	111
1714	hsa-mir-99a	Endometriosis	111
1715	hsa-mir-99b	Endometriosis	111
1716	hsa-mir-101	Endomyocardial Fibrosis	112
1717	hsa-mir-208a	Endomyocardial Fibrosis	112
1718	hsa-mir-25	Endomyocardial Fibrosis	112
1719	hsa-mir-29a	Endomyocardial Fibrosis	112
1720	hsa-let-7c	Eosinophilic Esophagitis	113
1721	hsa-mir-106b	Eosinophilic Esophagitis	113
1722	hsa-mir-132	Eosinophilic Esophagitis	113
1723	hsa-mir-142	Eosinophilic Esophagitis	113
1724	hsa-mir-144	Eosinophilic Esophagitis	113
1725	hsa-mir-145	Eosinophilic Esophagitis	113
1726	hsa-mir-146a	Eosinophilic Esophagitis	113
1727	hsa-mir-146b	Eosinophilic Esophagitis	113
1728	hsa-mir-193a	Eosinophilic Esophagitis	113
1729	hsa-mir-193b	Eosinophilic Esophagitis	113
1730	hsa-mir-21	Eosinophilic Esophagitis	113
1731	hsa-mir-210	Eosinophilic Esophagitis	113
1732	hsa-mir-211	Eosinophilic Esophagitis	113
1733	hsa-mir-212	Eosinophilic Esophagitis	113
1734	hsa-mir-222	Eosinophilic Esophagitis	113
1735	hsa-mir-223	Eosinophilic Esophagitis	113
1736	hsa-mir-29b	Eosinophilic Esophagitis	113
1737	hsa-mir-30a	Eosinophilic Esophagitis	113
1738	hsa-mir-339	Eosinophilic Esophagitis	113
1739	hsa-mir-365a	Eosinophilic Esophagitis	113
1740	hsa-mir-375	Eosinophilic Esophagitis	113
1741	hsa-mir-592	Eosinophilic Esophagitis	113
1742	hsa-mir-675	Eosinophilic Esophagitis	113
1743	hsa-mir-7	Eosinophilic Esophagitis	113
1744	hsa-mir-92a	Eosinophilic Esophagitis	113
1745	hsa-let-7d	Ependymoma	114
1746	hsa-mir-135a	Ependymoma	114
1747	hsa-mir-17	Ependymoma	114
1748	hsa-mir-367	Ependymoma	114
1749	hsa-mir-383	Ependymoma	114
1750	hsa-mir-485	Ependymoma	114
1751	hsa-mir-596	Ependymoma	114
1752	hsa-let-7a	Esophageal Neoplasms	115
1753	hsa-let-7b	Esophageal Neoplasms	115
1754	hsa-let-7c	Esophageal Neoplasms	115
1755	hsa-mir-100	Esophageal Neoplasms	115
1756	hsa-mir-101	Esophageal Neoplasms	115
1757	hsa-mir-1246	Esophageal Neoplasms	115
1758	hsa-mir-126	Esophageal Neoplasms	115
1759	hsa-mir-1286	Esophageal Neoplasms	115
1760	hsa-mir-129	Esophageal Neoplasms	115
1761	hsa-mir-130a	Esophageal Neoplasms	115
1762	hsa-mir-130b	Esophageal Neoplasms	115
1763	hsa-mir-1322	Esophageal Neoplasms	115
1764	hsa-mir-133a	Esophageal Neoplasms	115
1765	hsa-mir-135b	Esophageal Neoplasms	115
1766	hsa-mir-141	Esophageal Neoplasms	115
1767	hsa-mir-143	Esophageal Neoplasms	115
1768	hsa-mir-145	Esophageal Neoplasms	115
1769	hsa-mir-146a	Esophageal Neoplasms	115
1770	hsa-mir-148a	Esophageal Neoplasms	115
1771	hsa-mir-150	Esophageal Neoplasms	115
1772	hsa-mir-155	Esophageal Neoplasms	115
1773	hsa-mir-15a	Esophageal Neoplasms	115
1774	hsa-mir-183	Esophageal Neoplasms	115
1775	hsa-mir-193a	Esophageal Neoplasms	115
1776	hsa-mir-196a	Esophageal Neoplasms	115
1777	hsa-mir-196b	Esophageal Neoplasms	115
1778	hsa-mir-199a	Esophageal Neoplasms	115
1779	hsa-mir-19a	Esophageal Neoplasms	115
1780	hsa-mir-200a	Esophageal Neoplasms	115
1781	hsa-mir-200c	Esophageal Neoplasms	115
1782	hsa-mir-205	Esophageal Neoplasms	115
1783	hsa-mir-20a	Esophageal Neoplasms	115
1784	hsa-mir-21	Esophageal Neoplasms	115
1785	hsa-mir-210	Esophageal Neoplasms	115
1786	hsa-mir-214	Esophageal Neoplasms	115
1787	hsa-mir-22	Esophageal Neoplasms	115
1788	hsa-mir-223	Esophageal Neoplasms	115
1789	hsa-mir-25	Esophageal Neoplasms	115
1790	hsa-mir-26a	Esophageal Neoplasms	115
1791	hsa-mir-27a	Esophageal Neoplasms	115
1792	hsa-mir-28	Esophageal Neoplasms	115
1793	hsa-mir-296	Esophageal Neoplasms	115
1794	hsa-mir-29c	Esophageal Neoplasms	115
1795	hsa-mir-302a	Esophageal Neoplasms	115
1796	hsa-mir-302f	Esophageal Neoplasms	115
1797	hsa-mir-30b	Esophageal Neoplasms	115
1798	hsa-mir-31	Esophageal Neoplasms	115
1799	hsa-mir-342	Esophageal Neoplasms	115
1800	hsa-mir-34a	Esophageal Neoplasms	115
1801	hsa-mir-34b	Esophageal Neoplasms	115
1802	hsa-mir-34c	Esophageal Neoplasms	115
1803	hsa-mir-375	Esophageal Neoplasms	115
1804	hsa-mir-425	Esophageal Neoplasms	115
1805	hsa-mir-451a	Esophageal Neoplasms	115
1806	hsa-mir-452	Esophageal Neoplasms	115
1807	hsa-mir-454	Esophageal Neoplasms	115
1808	hsa-mir-455	Esophageal Neoplasms	115
1809	hsa-mir-499a	Esophageal Neoplasms	115
1810	hsa-mir-518b	Esophageal Neoplasms	115
1811	hsa-mir-519c	Esophageal Neoplasms	115
1812	hsa-mir-548d	Esophageal Neoplasms	115
1813	hsa-mir-574	Esophageal Neoplasms	115
1814	hsa-mir-593	Esophageal Neoplasms	115
1815	hsa-mir-617	Esophageal Neoplasms	115
1816	hsa-mir-758	Esophageal Neoplasms	115
1817	hsa-mir-766	Esophageal Neoplasms	115
1818	hsa-mir-92a	Esophageal Neoplasms	115
1819	hsa-mir-98	Esophageal Neoplasms	115
1820	hsa-mir-99a	Esophageal Neoplasms	115
1821	hsa-mir-99b	Esophageal Neoplasms	115
1822	hsa-mir-184	Eye Abnormalities	116
1823	hsa-mir-181c	Fanconi Anemia	117
1824	hsa-mir-1224	Fatty Liver	118
1825	hsa-mir-15b	Fatty Liver	118
1826	hsa-mir-182	Fatty Liver	118
1827	hsa-mir-183	Fatty Liver	118
1828	hsa-mir-216a	Fatty Liver	118
1829	hsa-mir-216b	Fatty Liver	118
1830	hsa-mir-302a	Fatty Liver	118
1831	hsa-mir-122	Fatty Liver, Alcoholic	119
1832	hsa-mir-16	Fatty Liver, Alcoholic	119
1833	hsa-mir-34a	Fatty Liver, Alcoholic	119
1834	hsa-mir-373	Fibrosarcoma	120
1835	hsa-mir-520c	Fibrosarcoma	120
1836	hsa-mir-192	Fibrosis	121
1837	hsa-mir-21	Fibrosis	121
1838	hsa-mir-29a	Fibrosis	121
1839	hsa-mir-29b	Fibrosis	121
1840	hsa-mir-29c	Fibrosis	121
1841	hsa-mir-21	Focal Epithelial Hyperplasia	122
1842	hsa-mir-134	Fragile X Syndrome	123
1843	hsa-mir-516a	Frontotemporal Lobar Degeneration	124
1844	hsa-mir-548b	Frontotemporal Lobar Degeneration	124
1845	hsa-mir-548c	Frontotemporal Lobar Degeneration	124
1846	hsa-mir-571	Frontotemporal Lobar Degeneration	124
1847	hsa-mir-922	Frontotemporal Lobar Degeneration	124
1848	hsa-mir-155	Gastritis, Atrophic	125
1849	hsa-let-7a	Gastrointestinal Neoplasms	126
1850	hsa-let-7g	Gastrointestinal Neoplasms	126
1851	hsa-mir-1	Gastrointestinal Neoplasms	126
1852	hsa-mir-107	Gastrointestinal Neoplasms	126
1853	hsa-mir-124	Gastrointestinal Neoplasms	126
1854	hsa-mir-126	Gastrointestinal Neoplasms	126
1855	hsa-mir-133b	Gastrointestinal Neoplasms	126
1856	hsa-mir-142	Gastrointestinal Neoplasms	126
1857	hsa-mir-146a	Gastrointestinal Neoplasms	126
1858	hsa-mir-148a	Gastrointestinal Neoplasms	126
1859	hsa-mir-152	Gastrointestinal Neoplasms	126
1860	hsa-mir-18b	Gastrointestinal Neoplasms	126
1861	hsa-mir-196a	Gastrointestinal Neoplasms	126
1862	hsa-mir-200a	Gastrointestinal Neoplasms	126
1863	hsa-mir-200b	Gastrointestinal Neoplasms	126
1864	hsa-mir-200c	Gastrointestinal Neoplasms	126
1865	hsa-mir-208a	Gastrointestinal Neoplasms	126
1866	hsa-mir-221	Gastrointestinal Neoplasms	126
1867	hsa-mir-222	Gastrointestinal Neoplasms	126
1868	hsa-mir-31	Gastrointestinal Neoplasms	126
1869	hsa-mir-338	Gastrointestinal Neoplasms	126
1870	hsa-mir-375	Gastrointestinal Neoplasms	126
1871	hsa-mir-451a	Gastrointestinal Neoplasms	126
1872	hsa-mir-494	Gastrointestinal Neoplasms	126
1873	hsa-mir-497	Gastrointestinal Neoplasms	126
1874	hsa-mir-7	Gastrointestinal Neoplasms	126
1875	hsa-mir-98	Gastrointestinal Neoplasms	126
1876	hsa-mir-146a	Gerstmann-Straussler-Scheinker Disease	127
1877	hsa-mir-224	Giant Cell Tumors	128
1878	hsa-let-7a	Glioblastoma	129
1879	hsa-let-7d	Glioblastoma	129
1880	hsa-mir-101	Glioblastoma	129
1881	hsa-mir-106a	Glioblastoma	129
1882	hsa-mir-10a	Glioblastoma	129
1883	hsa-mir-10b	Glioblastoma	129
1884	hsa-mir-124	Glioblastoma	129
1885	hsa-mir-125b	Glioblastoma	129
1886	hsa-mir-1260a	Glioblastoma	129
1887	hsa-mir-128	Glioblastoma	129
1888	hsa-mir-1305	Glioblastoma	129
1889	hsa-mir-130a	Glioblastoma	129
1890	hsa-mir-134	Glioblastoma	129
1891	hsa-mir-137	Glioblastoma	129
1892	hsa-mir-139	Glioblastoma	129
1893	hsa-mir-142	Glioblastoma	129
1894	hsa-mir-143	Glioblastoma	129
1895	hsa-mir-145	Glioblastoma	129
1896	hsa-mir-146a	Glioblastoma	129
1897	hsa-mir-146b	Glioblastoma	129
1898	hsa-mir-148a	Glioblastoma	129
1899	hsa-mir-149	Glioblastoma	129
1900	hsa-mir-151a	Glioblastoma	129
1901	hsa-mir-153	Glioblastoma	129
1902	hsa-mir-155	Glioblastoma	129
1903	hsa-mir-15a	Glioblastoma	129
1904	hsa-mir-16	Glioblastoma	129
1905	hsa-mir-17	Glioblastoma	129
1906	hsa-mir-181a	Glioblastoma	129
1907	hsa-mir-181b	Glioblastoma	129
1908	hsa-mir-181c	Glioblastoma	129
1909	hsa-mir-181d	Glioblastoma	129
1910	hsa-mir-183	Glioblastoma	129
1911	hsa-mir-184	Glioblastoma	129
1912	hsa-mir-18a	Glioblastoma	129
1913	hsa-mir-193a	Glioblastoma	129
1914	hsa-mir-195	Glioblastoma	129
1915	hsa-mir-196b	Glioblastoma	129
1916	hsa-mir-19a	Glioblastoma	129
1917	hsa-mir-19b	Glioblastoma	129
1918	hsa-mir-200b	Glioblastoma	129
1919	hsa-mir-205	Glioblastoma	129
1920	hsa-mir-206	Glioblastoma	129
1921	hsa-mir-208a	Glioblastoma	129
1922	hsa-mir-208b	Glioblastoma	129
1923	hsa-mir-20a	Glioblastoma	129
1924	hsa-mir-20b	Glioblastoma	129
1925	hsa-mir-21	Glioblastoma	129
1926	hsa-mir-210	Glioblastoma	129
1927	hsa-mir-218	Glioblastoma	129
1928	hsa-mir-22	Glioblastoma	129
1929	hsa-mir-221	Glioblastoma	129
1930	hsa-mir-222	Glioblastoma	129
1931	hsa-mir-224	Glioblastoma	129
1932	hsa-mir-23b	Glioblastoma	129
1933	hsa-mir-25	Glioblastoma	129
1934	hsa-mir-26a	Glioblastoma	129
1935	hsa-mir-27b	Glioblastoma	129
1936	hsa-mir-29a	Glioblastoma	129
1937	hsa-mir-29c	Glioblastoma	129
1938	hsa-mir-302a	Glioblastoma	129
1939	hsa-mir-302b	Glioblastoma	129
1940	hsa-mir-302c	Glioblastoma	129
1941	hsa-mir-302d	Glioblastoma	129
1942	hsa-mir-30a	Glioblastoma	129
1943	hsa-mir-30c	Glioblastoma	129
1944	hsa-mir-31	Glioblastoma	129
1945	hsa-mir-3163	Glioblastoma	129
1946	hsa-mir-32	Glioblastoma	129
1947	hsa-mir-323a	Glioblastoma	129
1948	hsa-mir-323b	Glioblastoma	129
1949	hsa-mir-326	Glioblastoma	129
1950	hsa-mir-328	Glioblastoma	129
1951	hsa-mir-329	Glioblastoma	129
1952	hsa-mir-342	Glioblastoma	129
1953	hsa-mir-34a	Glioblastoma	129
1954	hsa-mir-367	Glioblastoma	129
1955	hsa-mir-376a	Glioblastoma	129
1956	hsa-mir-381	Glioblastoma	129
1957	hsa-mir-425	Glioblastoma	129
1958	hsa-mir-451a	Glioblastoma	129
1959	hsa-mir-452	Glioblastoma	129
1960	hsa-mir-455	Glioblastoma	129
1961	hsa-mir-491	Glioblastoma	129
1962	hsa-mir-504	Glioblastoma	129
1963	hsa-mir-539	Glioblastoma	129
1964	hsa-mir-7	Glioblastoma	129
1965	hsa-mir-708	Glioblastoma	129
1966	hsa-mir-873	Glioblastoma	129
1967	hsa-mir-885	Glioblastoma	129
1968	hsa-mir-9	Glioblastoma	129
1969	hsa-mir-92a	Glioblastoma	129
1970	hsa-mir-95	Glioblastoma	129
1971	hsa-mir-99a	Glioblastoma	129
1972	hsa-mir-106a	Glioma	130
1973	hsa-mir-106b	Glioma	130
1974	hsa-mir-107	Glioma	130
1975	hsa-mir-10b	Glioma	130
1976	hsa-mir-124	Glioma	130
1977	hsa-mir-125b	Glioma	130
1978	hsa-mir-128	Glioma	130
1979	hsa-mir-135a	Glioma	130
1980	hsa-mir-138	Glioma	130
1981	hsa-mir-139	Glioma	130
1982	hsa-mir-143	Glioma	130
1983	hsa-mir-145	Glioma	130
1984	hsa-mir-146b	Glioma	130
1985	hsa-mir-149	Glioma	130
1986	hsa-mir-152	Glioma	130
1987	hsa-mir-15b	Glioma	130
1988	hsa-mir-16	Glioma	130
1989	hsa-mir-17	Glioma	130
1990	hsa-mir-181a	Glioma	130
1991	hsa-mir-181b	Glioma	130
1992	hsa-mir-181d	Glioma	130
1993	hsa-mir-182	Glioma	130
1994	hsa-mir-183	Glioma	130
1995	hsa-mir-185	Glioma	130
1996	hsa-mir-18a	Glioma	130
1997	hsa-mir-18b	Glioma	130
1998	hsa-mir-195	Glioma	130
1999	hsa-mir-196a	Glioma	130
[truncated: 3,049 more rows]

## Sheet: disease
number	disease
1	ACTH-Secreting Pituitary Adenoma
2	AIDS Dementia Complex
3	Abortion, Habitual
4	Acquired Immunodeficiency Syndrome
5	Acute Coronary Syndrome
6	Acute Kidney Injury
7	Acute Lung Injury
8	Adenocarcinoma
9	Adenoma
10	Adenovirus Infections
11	Tumors of Adrenal Cortex
12	Adrenal Cortical Adenoma
13	Adrenocortical Carcinoma
14	Albuminuria
15	Alopecia
16	Alzheimers Disease
17	Amyloidosis
18	Amyotrophic Lateral Sclerosis
19	Anemia, Sickle Cell
20	Angina, Unstable
21	Anoxia
22	Antiphospholipid Syndrome
23	Anus Neoplasms
24	Anxiety Disorders
25	Aortic Aneurysm, Abdominal
26	Aortic Aneurysm, Thoracic
27	Aortic Valve Insufficiency
28	Aortic Valve Stenosis
29	Cardiac Arrhythmia
30	Arthritis
31	Arthritis, Psoriatic
32	Rheumatoid Arthritis
33	Asthma
34	Astrocytoma
35	Atherosclerosis
36	Atrial Fibrillation
37	Atrophic
38	Autistic Disorder
39	Autoimmune Diseases
40	Azoospermia
41	Barrett Esophagus
42	Behcet Syndrome
43	Biliary Atresia
44	Biliary Tract Cancer
45	Traumatic Brain Injury
46	Brain Ischemia
47	Brain Neoplasms
48	Breast Carcinoma
49	Burkitt Lymphoma
50	Basal Cell Carcinoma
51	Mammary Ductal Carcinoma
52	Carcinoma, Ehrlich Tumor
53	Embryonal Carcinoma
54	Carcinoma, Endometrioid
55	Liver carcinoma
56	Carcinoma, Neuroendocrine
57	Non-Small Cell Lung Carcinoma
58	Renal Cell Carcinoma
59	Carcinoma, Small Cell
60	Squamous cell carcinoma
61	Cardiomegaly
62	Cardiomyopathies
63	Cardiomyopathy, Dilated
64	Hypertrophic Cardiomyopathy
65	Cardiovascular Diseases
66	Carotid Artery Diseases
67	Cataract
68	nervous system disorder
69	Cerebellar Neoplasms
70	Cerebral Hemorrhage
71	Cerebral Infarction
72	Cervical Intraepithelial Neoplasia
73	Child Development Disorders, Pervasive
74	Chlamydia Infections
75	Cholangiocarcinoma
76	Cholesteatoma
77	Chondrodysplasia Punctata
78	Chordoma
79	Choriocarcinoma
80	Cicatrix
81	Cocaine-Related Disorders
82	Colitis
83	Ulcerative Colitis
84	Colonic Neoplasms
85	Colorectal Neoplasms
86	Hereditary Nonpolyposis Colorectal Neoplasms
87	Coronary Artery Disease
88	Creutzfeldt-Jakob disease
89	Crohn Disease
90	Cystic Fibrosis
91	Interstitial Cystitis
92	Dementia
93	Demyelinating Diseases
94	Dermatitis, Atopic
95	Complications of Diabetes Mellitus
96	Diabetes Mellitus
97	Diabetes Mellitus, Insulin-Dependent
98	Diabetes Mellitus, Non-Insulin-Dependent
99	Diabetic Nephropathy
100	Diabetic Retinopathy
101	Digestive System Neoplasms
102	Distal Muscular Dystrophies
103	Down Syndrome
104	Drug-Induced Liver Injury
105	Dyslipidemias
106	Dyspepsia
107	Eclampsia
108	Eczema
109	Experimental Autoimmune Encephalomyelitis
110	Endometrial Neoplasms
111	Endometriosis
112	Endomyocardial Fibrosis
113	Eosinophilic Esophagitis
114	Ependymoma
115	Esophageal Neoplasms
116	Eye Abnormalities
117	Fanconi Anemia
118	Fatty Liver
119	Fatty Liver, Alcoholic
120	Fibrosarcoma
121	Fibrosis
122	Focal Epithelial Hyperplasia
123	Fragile X Syndrome
124	Frontotemporal Lobar Degeneration
125	Gastritis, Atrophic
126	Gastrointestinal Neoplasms
127	Gerstmann-Straussler-Scheinker Disease
128	Giant Cell Tumors
129	Glioblastoma
130	Glioma
131	Glomerulonephritis
132	Primary immunoglobulin A nephropathy (disorder)
133	Gout
134	Graft-vs-Host Disease
135	Granulosa Cell Tumor
136	Graves Disease
137	HIV Infections
138	Hamartoma Syndrome, Multiple
139	Hand, Foot and Mouth Disease
140	Head and Neck Neoplasms
141	Hearing Loss
142	Congenital Heart Defects
143	Heart Diseases
144	Heart Failure
145	Hemangioma
146	Hemangiosarcoma
147	Hematologic Neoplasms
148	Hepatitis
149	Hepatitis B
150	Hepatitis B, Chronic
151	Hepatitis C
152	Hepatitis C, Chronic
153	Hepatitis E
154	Hepatitis, Chronic
155	Hepatoblastoma
156	Hodgkin Disease
157	Huntington Disease
158	Hyperglycemia
159	Hyperlipidemia
160	Hypertensive disease
161	Left Ventricular Hypertrophy
162	Hypopharyngeal Neoplasms
163	Hypoxia-Ischemia, Brain
164	Male infertility
165	Inflammation
166	Inflammatory Bowel Diseases
167	Influenza
168	Intellectual Disability
169	Intracranial Aneurysm
170	Irritable Bowel Syndrome
171	Ischemia
172	Keloid
173	Keratoconus
174	Kidney Diseases
175	Kidney Failure, Chronic
176	Kidney Neoplasm
177	Laryngeal neoplasm
178	Leiomyomatosis
179	Leiomyosarcoma
180	Leprosy
181	Leukemia
182	Leukemia, B-Cell
183	Acute biphenotypic leukemia
184	Chronic Lymphocytic Leukemia
185	Chronic myelogenous leukemia, BCR/ABL positive
186	Myeloid Leukemia
187	Acute Myeloid Leukemia, M1
188	Leukemia, Myeloid, Chronic-Phase
189	Acute Promyelocytic Leukemia
190	Adult T-Cell Lymphoma/Leukemia
191	Leukoplakia, Oral
192	Lichen Planus, Oral
193	Lipid Metabolism Disorders
194	Liposarcoma
195	Liver Cirrhosis
196	Biliary cirrhosis
197	Liver Diseases
198	Alcoholic Liver Diseases
199	Liver Failure
200	Liver Neoplasms
201	Long QT Syndrome
202	Lung Diseases
203	Lung Diseases, Interstitial
204	Lung Neoplasms
205	Lupus Erythematosus, Systemic
206	Lupus Nephritis
207	Lupus Vulgaris
208	Lymphoma
209	B-Cell Lymphomas
210	Lymphoma, Extranodal NK-T-Cell
211	Diffuse Large B-Cell Lymphoma
212	Anaplastic large B-cell lymphoma
213	Mantle cell lymphoma refractory
214	Lymphoma, Non-Hodgkin
215	Primary Effusion Lymphoma
216	T-Cell Lymphoma
217	Lymphoproliferative Disorders
218	Marek Disease
219	Mastocytosis, Systemic
220	Medulloblastoma
221	Melanoma
222	Meningioma
223	Mesothelioma
224	Metabolic Diseases
225	Mouth Neoplasms
226	Moyamoya Disease
227	Multiple Endocrine Neoplasia Type 1
228	Multiple Myeloma
229	Multiple Sclerosis
230	Muscular Disorders, Atrophic
231	Muscular Dystrophy
232	Muscular Dystrophy, Duchenne
233	Muscular Dystrophy, Facioscapulohumeral
234	Congenital musculoskeletal anomalies
235	Myasthenia Gravis
236	Mycosis Fungoides
237	MYELODYSPLASTIC SYNDROME
238	Myeloproliferative disease
239	Myocardial Infarction
240	Myocardial Ischemia
241	Myocardial Reperfusion Injury
242	Myocarditis
243	Myopia
244	Myositis Ossificans
245	Myotonic Dystrophy
246	Nasal Polyps
247	Nasopharyngeal Neoplasms
248	Neoplasms, Germ Cell and Embryonal
249	Neoplasms, Glandular and Epithelial
250	Squamous Cell Neoplasms
251	Nephrosclerosis
252	Nerve Sheath Tumors
253	Neurilemmoma
254	Neuroblastoma
255	Neurodegenerative Disorders
256	Neurofibromatosis 2
257	Acoustic Neuroma
258	Neutropenia
259	Melanocytic nevus
260	Non-alcoholic Fatty Liver Disease
261	Obesity
262	Odontogenic Tumors
263	Oligodendroglioma
264	Generalized osteoarthritis
265	Osteoporosis
266	Osteosarcoma
267	ovarian neoplasm
268	Pain
269	Pancreatic Neoplasm
270	Panic Disorder
271	Parkinson Disease
272	Familial benign pemphigus
273	Periodontal Diseases
274	Periodontitis
275	Pheochromocytoma
276	Pituitary Neoplasms
277	Polycystic Kidney Diseases
278	Polycystic Ovary Syndrome
279	Polycythemia Vera
280	Pre-Eclampsia
281	Precursor B-Cell Lymphoblastic Leukemia-Lymphoma
282	Precursor Cell Lymphoblastic Leukemia Lymphoma
283	Precursor T-Cell Lymphoblastic Leukemia-Lymphoma
284	Ectopic Pregnancy
285	Prion Diseases
286	Prolactinoma
287	Prostatic Neoplasms
288	Psoriasis
289	Psychotic Disorders
290	Chronic Obstructive Airway Disease
291	Pulmonary Embolism
292	Pulmonary Fibrosis
293	RNA Virus Infections
294	Radiation Damage
295	Rectal Neoplasms
296	Renal Insufficiency
297	Reperfusion Injury
298	Retinal Degeneration
299	Retinal Neovascularization
300	Retinoblastoma
301	Rhabdomyosarcoma
302	Rhinitis, Allergic, Perennial
303	Salivary Gland Neoplasms
304	Sarcoma
305	Ewings sarcoma
306	Kaposi Sarcoma
307	synovial sarcoma
308	Schistosomiasis
309	Schizophrenia
310	Localized scleroderma
311	Systemic Scleroderma
312	Sepsis
313	Sezary Syndrome
314	Sigmoid Neoplasms
315	Sjogrens Syndrome
316	Skin Neoplasms
317	Small cell carcinoma of lung
318	Spinal Cord Diseases
319	Stomach Diseases
320	Stomach Neoplasms
321	Cerebrovascular accident
322	Progressive supranuclear palsy
323	Testicular Neoplasms
324	Thyroid Neoplasm
325	Tongue Neoplasms
326	Gilles de la Tourette syndrome
327	Toxoplasmosis
328	Tuberculosis, Pulmonary
329	Malignant neoplasm of urinary bladder
330	Uterine Cervical Neoplasm
331	Vascular Calcification
332	Vascular Diseases
333	Vitiligo
334	Waldenstrom Macroglobulinemia

## Sheet: miRNA
1	hsa-let-7a
2	hsa-let-7b
3	hsa-let-7c
4	hsa-let-7d
5	hsa-let-7e
6	hsa-let-7f
7	hsa-let-7g
8	hsa-let-7i
9	hsa-mir-1
10	hsa-mir-100
11	hsa-mir-101
12	hsa-mir-103a
13	hsa-mir-103b
14	hsa-mir-105
15	hsa-mir-106a
16	hsa-mir-106b
17	hsa-mir-107
18	hsa-mir-10a
19	hsa-mir-10b
20	hsa-mir-1179
21	hsa-mir-1180
22	hsa-mir-1181
23	hsa-mir-1183
24	hsa-mir-1184
25	hsa-mir-1202
26	hsa-mir-1207
27	hsa-mir-122
28	hsa-mir-1224
29	hsa-mir-1227
30	hsa-mir-1228
31	hsa-mir-1229
32	hsa-mir-1231
33	hsa-mir-1233
34	hsa-mir-1234
35	hsa-mir-1236
36	hsa-mir-124
37	hsa-mir-1245a
38	hsa-mir-1245b
39	hsa-mir-1246
40	hsa-mir-1247
41	hsa-mir-1249
42	hsa-mir-1254
43	hsa-mir-1256
44	hsa-mir-1258
45	hsa-mir-125a
46	hsa-mir-125b
47	hsa-mir-126
48	hsa-mir-1260a
49	hsa-mir-1266
50	hsa-mir-127
51	hsa-mir-1271
52	hsa-mir-1273a
53	hsa-mir-1273c
54	hsa-mir-1275
55	hsa-mir-128
56	hsa-mir-1285
57	hsa-mir-1286
58	hsa-mir-129
59	hsa-mir-1290
60	hsa-mir-1293
61	hsa-mir-1296
62	hsa-mir-1297
63	hsa-mir-1299
64	hsa-mir-1301
65	hsa-mir-1302
66	hsa-mir-1303
67	hsa-mir-1305
68	hsa-mir-130a
69	hsa-mir-130b
70	hsa-mir-132
71	hsa-mir-1322
72	hsa-mir-1323
73	hsa-mir-133a
74	hsa-mir-133b
75	hsa-mir-134
76	hsa-mir-135a
77	hsa-mir-135b
78	hsa-mir-136
79	hsa-mir-137
80	hsa-mir-138
81	hsa-mir-139
82	hsa-mir-140
83	hsa-mir-141
84	hsa-mir-142
85	hsa-mir-143
86	hsa-mir-144
87	hsa-mir-145
88	hsa-mir-1469
89	hsa-mir-146a
90	hsa-mir-146b
91	hsa-mir-1471
92	hsa-mir-147a
93	hsa-mir-147b
94	hsa-mir-148a
95	hsa-mir-148b
96	hsa-mir-149
97	hsa-mir-150
98	hsa-mir-151a
99	hsa-mir-151b
100	hsa-mir-152
101	hsa-mir-153
102	hsa-mir-154
103	hsa-mir-155
104	hsa-mir-15a
105	hsa-mir-15b
106	hsa-mir-16
107	hsa-mir-17
108	hsa-mir-181a
109	hsa-mir-181b
110	hsa-mir-181c
111	hsa-mir-181d
112	hsa-mir-182
113	hsa-mir-1827
114	hsa-mir-183
115	hsa-mir-184
116	hsa-mir-185
117	hsa-mir-186
118	hsa-mir-187
119	hsa-mir-188
120	hsa-mir-18a
121	hsa-mir-18b
122	hsa-mir-1909
123	hsa-mir-190a
124	hsa-mir-190b
125	hsa-mir-191
126	hsa-mir-1915
127	hsa-mir-192
128	hsa-mir-193a
129	hsa-mir-193b
130	hsa-mir-194
131	hsa-mir-195
132	hsa-mir-196a
133	hsa-mir-196b
134	hsa-mir-197
135	hsa-mir-1972
136	hsa-mir-198
137	hsa-mir-199a
138	hsa-mir-199b
139	hsa-mir-19a
140	hsa-mir-19b
141	hsa-mir-200a
142	hsa-mir-200b
143	hsa-mir-200c
144	hsa-mir-202
145	hsa-mir-204
146	hsa-mir-205
147	hsa-mir-206
148	hsa-mir-208a
149	hsa-mir-208b
150	hsa-mir-20a
151	hsa-mir-20b
152	hsa-mir-21
153	hsa-mir-210
154	hsa-mir-211
155	hsa-mir-2110
156	hsa-mir-212
157	hsa-mir-214
158	hsa-mir-215
159	hsa-mir-216a
160	hsa-mir-216b
161	hsa-mir-217
162	hsa-mir-218
163	hsa-mir-22
164	hsa-mir-221
165	hsa-mir-222
166	hsa-mir-223
167	hsa-mir-224
168	hsa-mir-2355
169	hsa-mir-23a
170	hsa-mir-23b
171	hsa-mir-24
172	hsa-mir-25
173	hsa-mir-26a
174	hsa-mir-26b
175	hsa-mir-27a
176	hsa-mir-27b
177	hsa-mir-28
178	hsa-mir-2861
179	hsa-mir-296
180	hsa-mir-297
181	hsa-mir-298
182	hsa-mir-299
183	hsa-mir-29a
184	hsa-mir-29b
185	hsa-mir-29c
186	hsa-mir-300
187	hsa-mir-301a
188	hsa-mir-301b
189	hsa-mir-302a
190	hsa-mir-302b
191	hsa-mir-302c
192	hsa-mir-302d
193	hsa-mir-302e
194	hsa-mir-302f
195	hsa-mir-30a
196	hsa-mir-30b
197	hsa-mir-30c
198	hsa-mir-30d
199	hsa-mir-30e
200	hsa-mir-31
201	hsa-mir-3130
202	hsa-mir-3148
203	hsa-mir-3151
204	hsa-mir-3163
205	hsa-mir-3179
206	hsa-mir-3186
207	hsa-mir-3196
208	hsa-mir-32
209	hsa-mir-320a
210	hsa-mir-320b
211	hsa-mir-320c
212	hsa-mir-320d
213	hsa-mir-320e
214	hsa-mir-323a
215	hsa-mir-323b
216	hsa-mir-324
217	hsa-mir-325
218	hsa-mir-326
219	hsa-mir-328
220	hsa-mir-329
221	hsa-mir-330
222	hsa-mir-331
223	hsa-mir-335
224	hsa-mir-337
225	hsa-mir-338
226	hsa-mir-339
227	hsa-mir-33a
228	hsa-mir-33b
229	hsa-mir-340
230	hsa-mir-342
231	hsa-mir-345
232	hsa-mir-346
233	hsa-mir-34a
234	hsa-mir-34b
235	hsa-mir-34c
236	hsa-mir-361
237	hsa-mir-362
238	hsa-mir-363
239	hsa-mir-365a
240	hsa-mir-365b
241	hsa-mir-367
242	hsa-mir-369
243	hsa-mir-370
244	hsa-mir-371a
245	hsa-mir-372
246	hsa-mir-373
247	hsa-mir-374a
248	hsa-mir-374b
249	hsa-mir-375
250	hsa-mir-376a
251	hsa-mir-376b
252	hsa-mir-376c
253	hsa-mir-377
254	hsa-mir-378a
255	hsa-mir-378b
256	hsa-mir-378c
257	hsa-mir-378d
258	hsa-mir-378e
259	hsa-mir-378f
260	hsa-mir-378g
261	hsa-mir-378h
262	hsa-mir-378i
263	hsa-mir-379
264	hsa-mir-381
265	hsa-mir-382
266	hsa-mir-383
267	hsa-mir-384
268	hsa-mir-3940
269	hsa-mir-409
270	hsa-mir-410
271	hsa-mir-411
272	hsa-mir-421
273	hsa-mir-422a
274	hsa-mir-423
275	hsa-mir-424
276	hsa-mir-425
277	hsa-mir-4257
278	hsa-mir-429
279	hsa-mir-4306
280	hsa-mir-431
281	hsa-mir-432
282	hsa-mir-433
283	hsa-mir-448
284	hsa-mir-449a
285	hsa-mir-449b
286	hsa-mir-449c
287	hsa-mir-450a
288	hsa-mir-450b
289	hsa-mir-451a
290	hsa-mir-451b
291	hsa-mir-452
292	hsa-mir-454
293	hsa-mir-455
294	hsa-mir-4792
295	hsa-mir-483
296	hsa-mir-484
297	hsa-mir-485
298	hsa-mir-487a
299	hsa-mir-487b
300	hsa-mir-488
301	hsa-mir-489
302	hsa-mir-490
303	hsa-mir-491
304	hsa-mir-492
305	hsa-mir-493
306	hsa-mir-494
307	hsa-mir-495
308	hsa-mir-497
309	hsa-mir-498
310	hsa-mir-499a
311	hsa-mir-499b
312	hsa-mir-500a
313	hsa-mir-500b
314	hsa-mir-501
315	hsa-mir-502
316	hsa-mir-503
317	hsa-mir-504
318	hsa-mir-505
319	hsa-mir-506
320	hsa-mir-507
321	hsa-mir-508
322	hsa-mir-509
323	hsa-mir-510
324	hsa-mir-512
325	hsa-mir-513a
326	hsa-mir-513b
327	hsa-mir-513c
328	hsa-mir-514a
329	hsa-mir-515
330	hsa-mir-516a
331	hsa-mir-516b
332	hsa-mir-517a
333	hsa-mir-517c
334	hsa-mir-518a
335	hsa-mir-518b
336	hsa-mir-518c
337	hsa-mir-518e
338	hsa-mir-518f
339	hsa-mir-519a
340	hsa-mir-519b
341	hsa-mir-519c
342	hsa-mir-519d
343	hsa-mir-519e
344	hsa-mir-520a
345	hsa-mir-520b
346	hsa-mir-520c
347	hsa-mir-520d
348	hsa-mir-520e
349	hsa-mir-520f
350	hsa-mir-520g
351	hsa-mir-520h
352	hsa-mir-521
353	hsa-mir-522
354	hsa-mir-523
355	hsa-mir-524
356	hsa-mir-525
357	hsa-mir-526a
358	hsa-mir-526b
359	hsa-mir-527
360	hsa-mir-532
361	hsa-mir-539
362	hsa-mir-542
363	hsa-mir-544a
364	hsa-mir-544b
365	hsa-mir-545
366	hsa-mir-548a
367	hsa-mir-548b
368	hsa-mir-548c
369	hsa-mir-548d
370	hsa-mir-550a
371	hsa-mir-550b
372	hsa-mir-551a
373	hsa-mir-552
374	hsa-mir-557
375	hsa-mir-561
376	hsa-mir-564
377	hsa-mir-566
378	hsa-mir-567
379	hsa-mir-569
380	hsa-mir-570
381	hsa-mir-571
382	hsa-mir-572
383	hsa-mir-574
384	hsa-mir-575
385	hsa-mir-577
386	hsa-mir-582
387	hsa-mir-583
388	hsa-mir-584
389	hsa-mir-589
390	hsa-mir-590
391	hsa-mir-591
392	hsa-mir-592
393	hsa-mir-593
394	hsa-mir-595
395	hsa-mir-596
396	hsa-mir-598
397	hsa-mir-599
398	hsa-mir-600
399	hsa-mir-601
400	hsa-mir-602
401	hsa-mir-603
402	hsa-mir-605
403	hsa-mir-608
404	hsa-mir-610
405	hsa-mir-611
406	hsa-mir-612
407	hsa-mir-614
408	hsa-mir-615
409	hsa-mir-616
410	hsa-mir-617
411	hsa-mir-619
412	hsa-mir-621
413	hsa-mir-622
414	hsa-mir-624
415	hsa-mir-625
416	hsa-mir-627
417	hsa-mir-628
418	hsa-mir-629
419	hsa-mir-630
420	hsa-mir-632
421	hsa-mir-633
422	hsa-mir-635
423	hsa-mir-636
424	hsa-mir-637
425	hsa-mir-638
426	hsa-mir-640
427	hsa-mir-642a
428	hsa-mir-642b
429	hsa-mir-646
430	hsa-mir-647
431	hsa-mir-648
432	hsa-mir-650
433	hsa-mir-652
434	hsa-mir-654
435	hsa-mir-655
436	hsa-mir-657
437	hsa-mir-658
438	hsa-mir-659
439	hsa-mir-660
440	hsa-mir-661
441	hsa-mir-662
442	hsa-mir-663a
443	hsa-mir-668
444	hsa-mir-671
445	hsa-mir-675
446	hsa-mir-7
447	hsa-mir-708
448	hsa-mir-711
449	hsa-mir-718
450	hsa-mir-744
451	hsa-mir-758
452	hsa-mir-760
453	hsa-mir-765
454	hsa-mir-766
455	hsa-mir-767
456	hsa-mir-769
457	hsa-mir-873
458	hsa-mir-874
459	hsa-mir-885
460	hsa-mir-9
461	hsa-mir-922
462	hsa-mir-92a
463	hsa-mir-92b
464	hsa-mir-93
465	hsa-mir-933
466	hsa-mir-935
467	hsa-mir-938
468	hsa-mir-941
469	hsa-mir-942
470	hsa-mir-944
471	hsa-mir-95
472	hsa-mir-96
473	hsa-mir-98
474	hsa-mir-99a
475	hsa-mir-99b
