# Supplementary material for: FCMDAP: using miRNA family and cluster information to improve the prediction accuracy of disease related miRNAs
Source: BMC Syst Biol. 2019 Apr 5;13(Suppl 2):26. doi: 10.1186/s12918-019-0696-9 (PMC6449885; doi:10.1186/s12918-019-0696-9)
Supplement: Supplementary file 2 — Integrated disease similarity. (XLSX 1379 kb) [file 12918_2019_696_MOESM2_ESM.xlsx]

## Sheet: Sheet1
1	0.0138074	0.0130458	0.0130678	0.0132133	0.0135672	0.0133107	0.0149394	0.0166712	0.0145752	0.0166512	0.0159199	0.0151524	0.0127211	0.0130161	0.0144338	0.0129234	0.0134802	0.0132637	0.0129793	0.0142819	0.0124081	0.0237875	0.0141494	0.0133619	0.0133983	0.0140228	0.0129915	0.012452	0.0134308	0.0130981	0.014017	0.0139204	0.0140864	0.013872	0.0124476	0.0134069	0.0139429	0.0131605	0.0125924	0.014491	0.0126339	0.0134428	0.0142355	0.0127519	0.0134001	0.0139941	0.0154056	0.0135047	0.0144975
0.0138074	1	0.0139791	0.0164668	0.0139385	0.0141562	0.0153416	0.0140392	0.0140006	0.013615	0.0133632	0.0131126	0.0135587	0.0136332	0.0128105	0.0141701	0.0147392	0.0135762	0.0137775	0.0149376	0.0138997	0.0142712	0.0156751	0.013341	0.0144923	0.0143119	0.013391	0.0143795	0.0127684	0.0143448	0.0145258	0.0144452	0.014067	0.0143939	0.0140626	0.0137239	0.0145438	0.0135249	0.0140295	0.0120373	0.0139093	0.0137877	0.0151384	0.0137189	0.0226854	0.014297	0.0140484	0.0151407	0.0136817	0.0141477
0.0130458	0.0139791	1	0.0140831	0.0138698	0.0134992	0.0147851	0.013731	0.0133837	0.013079	0.0134789	0.0135853	0.0134094	0.0135523	0.0140914	0.0135795	0.0136116	0.0128574	0.0138362	0.0145846	0.0134389	0.0151265	0.0137503	0.0132241	0.0142164	0.0134352	0.0149237	0.0131815	0.0123239	0.0138871	0.0153163	0.0142039	0.013553	0.0132958	0.0135947	0.0137417	0.013725	0.0132598	0.0143269	0.0136315	0.0131785	0.0153785	0.0139099	0.0135031	0.0122227	0.0137772	0.0132024	0.0143933	0.0133653	0.0134282
0.0130678	0.0164668	0.0140831	1	0.0137988	0.013473	0.014204	0.0143521	0.0138576	0.0138752	0.0132749	0.0130882	0.0132021	0.0130806	0.0135377	0.0139854	0.0138426	0.0135779	0.0138184	0.0138922	0.0136855	0.0141436	0.0133991	0.013547	0.0140604	0.0138336	0.013755	0.0132792	0.0122323	0.014726	0.0148463	0.0155094	0.0147721	0.0141668	0.0140074	0.0129657	0.0134843	0.0137999	0.0148367	0.0127185	0.0137313	0.014907	0.0141789	0.013708	0.0155216	0.013608	0.013912	0.0154554	0.0146548	0.0137126
0.0132133	0.0139385	0.0138698	0.0137988	1	0.0142946	0.0143745	0.0141815	0.0138754	0.0136562	0.0133624	0.0135103	0.0135415	0.0141267	0.013008	0.0147608	0.0140978	0.0136216	0.0142861	0.0157114	0.0140253	0.0148153	0.0124868	0.0134663	0.0146183	0.0139024	0.0141908	0.0145624	0.0135361	0.0143511	0.0141666	0.0147978	0.0145742	0.0136831	0.0150977	0.0143912	0.013884	0.0130241	0.0141792	0.0123357	0.0134372	0.0140258	0.0138797	0.0134427	0.0141651	0.0148063	0.0135836	0.0152102	0.0132412	0.0135324
0.0135672	0.0141562	0.0134992	0.013473	0.0142946	1	0.015096	0.0143804	0.0140861	0.0137629	0.0136405	0.0137122	0.0135634	0.0140573	0.0130307	0.01399	0.013944	0.0135895	0.0142926	0.0140117	0.0141957	0.0137459	0.0145199	0.0136096	0.0141209	0.0139105	0.0146993	0.0143602	0.0135503	0.0138195	0.0134721	0.0142271	0.0141855	0.0138525	0.01433	0.0137351	0.014049	0.0129422	0.0135559	0.0122347	0.013662	0.0132695	0.0137613	0.0140983	0.0126631	0.0141913	0.0138501	0.0149392	0.0133871	0.0137232
0.0133107	0.0153416	0.0147851	0.014204	0.0143745	0.015096	1	0.0142371	0.0139365	0.0137238	0.0132848	0.0129574	0.0131363	0.0143223	0.0131833	0.0141021	0.0138459	0.0134893	0.0139109	0.0143901	0.0141756	0.0140751	0.0121921	0.0132538	0.0142468	0.0138354	0.0134424	0.013386	0.012918	0.014186	0.0140444	0.0142494	0.0143822	0.0138711	0.0141533	0.0138711	0.015164	0.0130428	0.0138379	0.0126382	0.0139999	0.0139113	0.0144959	0.013705	0.0124297	0.0144732	0.0138165	0.0148313	0.0135732	0.0144079
0.0149394	0.0140392	0.013731	0.0143521	0.0141815	0.0143804	0.0142371	1	0.0171845	0.0153723	0.0156785	0.0150665	0.0154626	0.0136068	0.0147752	0.0157315	0.0142544	0.0148079	0.0142346	0.0138244	0.01558	0.0138026	0.014038	0.014861	0.0143402	0.0147682	0.0145955	0.0142326	0.0133771	0.0148	0.0139672	0.0154078	0.015241	0.0159716	0.0151287	0.0133506	0.0141456	0.0147104	0.0145206	0.0139294	0.0158219	0.0138006	0.0147183	0.0158807	0.0132823	0.0143033	0.0159821	0.0200336	0.0149828	0.0155602
0.0166712	0.0140006	0.0133837	0.0138576	0.0138754	0.0140861	0.0139365	0.0171845	1	0.0148517	0.015967	0.0163831	0.015743	0.0132964	0.0147167	0.0152839	0.013868	0.0142535	0.0138122	0.0135581	0.0148919	0.0131835	0.014365	0.0144754	0.0138535	0.0147054	0.0140545	0.0140547	0.0133997	0.0143657	0.0136182	0.014941	0.0146633	0.0153546	0.0146674	0.013333	0.0139912	0.0145501	0.014095	0.0133526	0.0152215	0.0133088	0.0142606	0.0153345	0.0134355	0.0140688	0.0151945	0.0184706	0.0144488	0.014854
0.0145752	0.013615	0.013079	0.0138752	0.0136562	0.0137629	0.0137238	0.0153723	0.0148517	1	0.0140611	0.0144843	0.0144638	0.0129614	0.0141622	0.0146605	0.0134497	0.0138515	0.0137659	0.0135961	0.0143676	0.01308	0.0164745	0.0136486	0.0136523	0.0136289	0.0138403	0.0134934	0.0133852	0.0139837	0.0136989	0.0145196	0.0140996	0.0148908	0.0142028	0.0127236	0.0135867	0.0138976	0.013944	0.0131188	0.0139646	0.0132695	0.0142084	0.0143533	0.0127157	0.0134349	0.0150196	0.0174986	0.0147933	0.0141095
0.0166512	0.0133632	0.0134789	0.0132749	0.0133624	0.0136405	0.0132848	0.0156785	0.015967	0.0140611	1	0.0184296	0.018257	0.012951	0.01526	0.0149679	0.0134968	0.0136469	0.0133097	0.0130756	0.0142838	0.0129945	0.0153027	0.0139534	0.0135406	0.0136374	0.0139492	0.0137503	0.0126083	0.0137931	0.0132769	0.0142323	0.0140028	0.0147559	0.0144132	0.0127906	0.0134897	0.0143985	0.0137583	0.0133851	0.014767	0.0128827	0.0137268	0.0150071	0.0127829	0.0133473	0.0146868	0.0173171	0.0135777	0.0145563
0.0159199	0.0131126	0.0135853	0.0130882	0.0135103	0.0137122	0.0129574	0.0150665	0.0163831	0.0144843	0.0184296	1	0.0189829	0.0129958	0.0147169	0.0151003	0.0131752	0.0135421	0.0131197	0.0135038	0.0142949	0.0126068	0.0160044	0.0143133	0.0135169	0.0138218	0.014964	0.013892	0.0135209	0.0135174	0.0128824	0.0141021	0.0139543	0.0144896	0.0141339	0.0133873	0.0135067	0.0146377	0.0132939	0.013096	0.0135528	0.0126367	0.0133501	0.01426	0.0131157	0.0137008	0.0141785	0.0168792	0.013372	0.0137403
0.0151524	0.0135587	0.0134094	0.0132021	0.0135415	0.0135634	0.0131363	0.0154626	0.015743	0.0144638	0.018257	0.0189829	1	0.0133507	0.0139494	0.0151288	0.0133365	0.0138698	0.0132762	0.0132342	0.014206	0.012806	0.0165184	0.0141207	0.0135338	0.0137067	0.0141855	0.013751	0.0131374	0.0136248	0.0131447	0.0141404	0.014246	0.0148171	0.0142376	0.0131341	0.0134039	0.014618	0.0135441	0.0130778	0.0139139	0.0127619	0.0136384	0.0146789	0.0130403	0.0136094	0.0146935	0.0171701	0.0136134	0.0142952
0.0127211	0.0136332	0.0135523	0.0130806	0.0141267	0.0140573	0.0143223	0.0136068	0.0132964	0.0129614	0.012951	0.0129958	0.0133507	1	0.01323	0.0141252	0.0138922	0.0133684	0.013908	0.014719	0.0136001	0.0141702	0.0116033	0.0133799	0.0137953	0.0135306	0.0139025	0.0138338	0.0130911	0.0134436	0.013328	0.0137163	0.0135372	0.0131898	0.0141261	0.0139562	0.0132222	0.0127764	0.0131989	0.0120246	0.0128796	0.0130888	0.0132597	0.0130158	0.0158167	0.0140067	0.0132044	0.014785	0.0131198	0.0130641
0.0130161	0.0128105	0.0140914	0.0135377	0.013008	0.0130307	0.0131833	0.0147752	0.0147167	0.0141622	0.01526	0.0147169	0.0139494	0.01323	1	0.0166961	0.0142834	0.0137428	0.0131185	0.0130471	0.0141298	0.0132604	0.0121879	0.0140714	0.013086	0.0131966	0.0149231	0.0137996	0.0120712	0.0139941	0.0136648	0.0141973	0.0138339	0.0139812	0.0139437	0.0127759	0.0133132	0.0161067	0.013618	0.0134682	0.0134785	0.0129084	0.0128888	0.0138564	0.0124101	0.0135384	0.0139357	0.0192523	0.0137077	0.0143373
0.0144338	0.0141701	0.0135795	0.0139854	0.0147608	0.01399	0.0141021	0.0157315	0.0152839	0.0146605	0.0149679	0.0151003	0.0151288	0.0141252	0.0166961	1	0.0161518	0.0165678	0.0142672	0.0140036	0.0152881	0.0140028	0.0131092	0.0157581	0.0142775	0.0146615	0.014757	0.0145919	0.0132236	0.0145805	0.0138902	0.0153755	0.0153633	0.0152049	0.0155935	0.0142866	0.0149415	0.0159566	0.0144865	0.0137664	0.0139818	0.0138988	0.0142839	0.0141838	0.0162263	0.0153775	0.0148339	0.0179024	0.0143275	0.0139348
0.0129234	0.0147392	0.0136116	0.0138426	0.0140978	0.013944	0.0138459	0.0142544	0.013868	0.0134497	0.0134968	0.0131752	0.0133365	0.0138922	0.0142834	0.0161518	1	0.0143634	0.0138292	0.0141502	0.0139221	0.0137806	0.0121851	0.0137469	0.0141804	0.0139587	0.0138165	0.0140968	0.0125405	0.0144955	0.01383	0.0156709	0.0139573	0.0140647	0.014604	0.0131897	0.014102	0.0135243	0.0143156	0.0125535	0.0131524	0.0137863	0.0136427	0.013457	0.0164147	0.0139875	0.0138224	0.015143	0.0137388	0.0132832
0.0134802	0.0135762	0.0128574	0.0135779	0.0136216	0.0135895	0.0134893	0.0148079	0.0142535	0.0138515	0.0136469	0.0135421	0.0138698	0.0133684	0.0137428	0.0165678	0.0143634	1	0.0134437	0.0134311	0.0147144	0.0134008	0.0126186	0.0148079	0.0134126	0.0139288	0.0136883	0.0136361	0.0125501	0.0139301	0.0131063	0.0147951	0.0144795	0.0145406	0.0141418	0.013547	0.0148442	0.015897	0.0140528	0.0131875	0.0134879	0.013194	0.0135687	0.0137528	0.0170101	0.0143624	0.0143317	0.016996	0.0136762	0.0134708
0.0132637	0.0137775	0.0138362	0.0138184	0.0142861	0.0142926	0.0139109	0.0142346	0.0138122	0.0137659	0.0133097	0.0131197	0.0132762	0.013908	0.0131185	0.0142672	0.0138292	0.0134437	1	0.0144138	0.0140125	0.014914	0.0121167	0.013485	0.0139213	0.0139281	0.0136361	0.0140151	0.0129785	0.014221	0.0137097	0.0144701	0.0142799	0.0138388	0.014374	0.0136629	0.0133979	0.0131829	0.0139441	0.0123261	0.0134362	0.0137866	0.0140201	0.0135296	0.0144216	0.0141171	0.0137085	0.0155947	0.013516	0.0133971
0.0129793	0.0149376	0.0145846	0.0138922	0.0157114	0.0140117	0.0143901	0.0138244	0.0135581	0.0135961	0.0130756	0.0135038	0.0132342	0.014719	0.0130471	0.0140036	0.0141502	0.0134311	0.0144138	1	0.0140325	0.0150242	0.0119454	0.0135301	0.0149336	0.0138479	0.01455	0.0144784	0.0132355	0.0142481	0.0141288	0.0142441	0.0140656	0.0136709	0.0147769	0.0144795	0.0139109	0.0128288	0.0139391	0.012065	0.0130712	0.0140104	0.014501	0.0133158	0.0170506	0.0147638	0.0135149	0.0149234	0.0133681	0.0133435
0.0142819	0.0138997	0.0134389	0.0136855	0.0140253	0.0141957	0.0141756	0.01558	0.0148919	0.0143676	0.0142838	0.0142949	0.014206	0.0136001	0.0141298	0.0152881	0.0139221	0.0147144	0.0140125	0.0140325	1	0.0136939	0.0135445	0.0140328	0.0141529	0.0141189	0.0143818	0.0141619	0.0133495	0.0143225	0.0134083	0.0147649	0.014424	0.0149806	0.0146495	0.0136314	0.0140403	0.0142843	0.0138537	0.0134964	0.0140749	0.0134467	0.0142786	0.0143115	0.0141932	0.0143345	0.0147958	0.0175497	0.0138954	0.0142307
0.0124081	0.0142712	0.0151265	0.0141436	0.0148153	0.0137459	0.0140751	0.0138026	0.0131835	0.01308	0.0129945	0.0126068	0.012806	0.0141702	0.0132604	0.0140028	0.0137806	0.0134008	0.014914	0.0150242	0.0136939	1	0.0118978	0.0130842	0.0142855	0.0138407	0.0134144	0.0136408	0.0124931	0.0145875	0.0144317	0.0147843	0.014142	0.0133249	0.0145782	0.014264	0.0133366	0.0128879	0.014996	0.0122188	0.0129901	0.0148467	0.0141026	0.012927	0.0123875	0.0143182	0.0133055	0.0145322	0.0130582	0.0127372
0.0237875	0.0156751	0.0137503	0.0133991	0.0124868	0.0145199	0.0121921	0.014038	0.014365	0.0164745	0.0153027	0.0160044	0.0165184	0.0116033	0.0121879	0.0131092	0.0121851	0.0126186	0.0121167	0.0119454	0.0135445	0.0118978	1	0.0130759	0.0129207	0.0124318	0.0152743	0.0120826	0.0113639	0.012769	0.0129258	0.0132191	0.0131794	0.0144482	0.0126742	0.0114957	0.0121332	0.0121808	0.0129563	0.0116975	0.0156922	0.012068	0.0124008	0.017298	0.0115241	0.0124014	0.0146729	0.0142882	0.0143056	0.0154097
0.0141494	0.013341	0.0132241	0.013547	0.0134663	0.0136096	0.0132538	0.014861	0.0144754	0.0136486	0.0139534	0.0143133	0.0141207	0.0133799	0.0140714	0.0157581	0.0137469	0.0148079	0.013485	0.0135301	0.0140328	0.0130842	0.0130759	1	0.0133923	0.0139615	0.0137876	0.0134691	0.0132151	0.0137562	0.0132106	0.0144259	0.0143883	0.0142814	0.0141648	0.0131247	0.0140654	0.0180539	0.0137643	0.0130408	0.0133711	0.0130108	0.0134413	0.0135665	0.0177046	0.0138237	0.0142989	0.0168925	0.0134194	0.013586
0.0133619	0.0144923	0.0142164	0.0140604	0.0146183	0.0141209	0.0142468	0.0143402	0.0138535	0.0136523	0.0135406	0.0135169	0.0135338	0.0137953	0.013086	0.0142775	0.0141804	0.0134126	0.0139213	0.0149336	0.0141529	0.0142855	0.0129207	0.0133923	1	0.0142413	0.0145645	0.0145312	0.0130145	0.0143653	0.0142274	0.0146171	0.01451	0.0138154	0.0148287	0.0137796	0.0135449	0.0131066	0.0139565	0.0125348	0.0135349	0.0138211	0.0142022	0.0137486	0.0147753	0.0145669	0.0137729	0.0152968	0.013394	0.0136415
0.0133983	0.0143119	0.0134352	0.0138336	0.0139024	0.0139105	0.0138354	0.0147682	0.0147054	0.0136289	0.0136374	0.0138218	0.0137067	0.0135306	0.0131966	0.0146615	0.0139587	0.0139288	0.0139281	0.0138479	0.0141189	0.0138407	0.0124318	0.0139615	0.0142413	1	0.0143702	0.0139649	0.0128956	0.0139318	0.0135245	0.0143072	0.0143145	0.0140657	0.0141512	0.0135214	0.0135355	0.0139607	0.01371	0.0130683	0.0137506	0.0133966	0.0138206	0.0142702	0.0127517	0.0139678	0.0139432	0.0161131	0.0134152	0.0140332
0.0140228	0.013391	0.0149237	0.013755	0.0141908	0.0146993	0.0134424	0.0145955	0.0140545	0.0138403	0.0139492	0.014964	0.0141855	0.0139025	0.0149231	0.014757	0.0138165	0.0136883	0.0136361	0.01455	0.0143818	0.0134144	0.0152743	0.0137876	0.0145645	0.0143702	1	0.0159667	0.0132593	0.0142201	0.0136266	0.0146893	0.0145604	0.014205	0.0144059	0.0140862	0.0135379	0.013361	0.0139289	0.0126128	0.0135952	0.01344	0.01349	0.0143847	0.0128109	0.0138868	0.0136065	0.0158486	0.0134648	0.013476
0.0129915	0.0143795	0.0131815	0.0132792	0.0145624	0.0143602	0.013386	0.0142326	0.0140547	0.0134934	0.0137503	0.013892	0.013751	0.0138338	0.0137996	0.0145919	0.0140968	0.0136361	0.0140151	0.0144784	0.0141619	0.0136408	0.0120826	0.0134691	0.0145312	0.0139649	0.0159667	1	0.01373	0.0140587	0.0135177	0.0141272	0.013998	0.0139968	0.0146183	0.0144784	0.013503	0.0129417	0.0134007	0.0122677	0.0133524	0.0133116	0.0137853	0.0133513	0.0169628	0.0142035	0.0137274	0.0156869	0.013248	0.0133843
0.012452	0.0127684	0.0123239	0.0122323	0.0135361	0.0135503	0.012918	0.0133771	0.0133997	0.0133852	0.0126083	0.0135209	0.0131374	0.0130911	0.0120712	0.0132236	0.0125405	0.0125501	0.0129785	0.0132355	0.0133495	0.0124931	0.0113639	0.0132151	0.0130145	0.0128956	0.0132593	0.01373	1	0.0128594	0.0123737	0.0128848	0.0128456	0.0129903	0.0141633	0.0168509	0.0126982	0.0132821	0.0124798	0.0116951	0.0124341	0.0120504	0.0125441	0.0125601	0.0124237	0.0133269	0.0127369	0.0145029	0.0121343	0.0125941
0.0134308	0.0143448	0.0138871	0.014726	0.0143511	0.0138195	0.014186	0.0148	0.0143657	0.0139837	0.0137931	0.0135174	0.0136248	0.0134436	0.0139941	0.0145805	0.0144955	0.0139301	0.014221	0.0142481	0.0143225	0.0145875	0.012769	0.0137562	0.0143653	0.0139318	0.0142201	0.0140587	0.0128594	1	0.0150691	0.0170664	0.0150754	0.0145215	0.0149786	0.0132227	0.0138379	0.0137004	0.0154029	0.012911	0.0139021	0.0145461	0.0142333	0.0138717	0.0125038	0.0139962	0.0142911	0.0165336	0.0142377	0.0137662
0.0130981	0.0145258	0.0153163	0.0148463	0.0141666	0.0134721	0.0140444	0.0139672	0.0136182	0.0136989	0.0132769	0.0128824	0.0131447	0.013328	0.0136648	0.0138902	0.01383	0.0131063	0.0137097	0.0141288	0.0134083	0.0144317	0.0129258	0.0132106	0.0142274	0.0135245	0.0136266	0.0135177	0.0123737	0.0150691	1	0.015877	0.0146575	0.0135717	0.0140658	0.013001	0.0133574	0.0128874	0.0152738	0.0122007	0.0135793	0.0156264	0.0142801	0.0133113	0.0122172	0.0137419	0.013577	0.0149385	0.0135664	0.0135721
0.014017	0.0144452	0.0142039	0.0155094	0.0147978	0.0142271	0.0142494	0.0154078	0.014941	0.0145196	0.0142323	0.0141021	0.0141404	0.0137163	0.0141973	0.0153755	0.0156709	0.0147951	0.0144701	0.0142441	0.0147649	0.0147843	0.0132191	0.0144259	0.0146171	0.0143072	0.0146893	0.0141272	0.0128848	0.0170664	0.015877	1	0.0159788	0.0150007	0.0153409	0.0136777	0.0138177	0.0142979	0.0166132	0.0132513	0.0144629	0.015201	0.0143689	0.0142486	0.0131055	0.0143598	0.0147413	0.0175007	0.0148059	0.0140602
0.0139204	0.014067	0.013553	0.0147721	0.0145742	0.0141855	0.0143822	0.015241	0.0146633	0.0140996	0.0140028	0.0139543	0.014246	0.0135372	0.0138339	0.0153633	0.0139573	0.0144795	0.0142799	0.0140656	0.014424	0.014142	0.0131794	0.0143883	0.01451	0.0143145	0.0145604	0.013998	0.0128456	0.0150754	0.0146575	0.0159788	1	0.0145977	0.0149705	0.0133944	0.013693	0.0140788	0.0152224	0.0130007	0.0139975	0.0145996	0.0141305	0.0142327	0.0132745	0.0142937	0.0143842	0.0171479	0.0142598	0.0140372
0.0140864	0.0143939	0.0132958	0.0141668	0.0136831	0.0138525	0.0138711	0.0159716	0.0153546	0.0148908	0.0147559	0.0144896	0.0148171	0.0131898	0.0139812	0.0152049	0.0140647	0.0145406	0.0138388	0.0136709	0.0149806	0.0133249	0.0144482	0.0142814	0.0138154	0.0140657	0.014205	0.0139968	0.0129903	0.0145215	0.0135717	0.0150007	0.0145977	1	0.0145127	0.0131827	0.0138339	0.0142642	0.0143347	0.0131301	0.0144756	0.013467	0.0141418	0.0152576	0.0138077	0.0139217	0.0160333	0.0176612	0.0145203	0.014618
0.013872	0.0140626	0.0135947	0.0140074	0.0150977	0.01433	0.0141533	0.0151287	0.0146674	0.0142028	0.0144132	0.0141339	0.0142376	0.0141261	0.0139437	0.0155935	0.014604	0.0141418	0.014374	0.0147769	0.0146495	0.0145782	0.0126742	0.0141648	0.0148287	0.0141512	0.0144059	0.0146183	0.0141633	0.0149786	0.0140658	0.0153409	0.0149705	0.0145127	1	0.0140351	0.014001	0.0139252	0.0144279	0.012929	0.0139592	0.0138879	0.0141284	0.014124	0.013466	0.0150444	0.0143277	0.0167213	0.0138937	0.0139273
0.0124476	0.0137239	0.0137417	0.0129657	0.0143912	0.0137351	0.0138711	0.0133506	0.013333	0.0127236	0.0127906	0.0133873	0.0131341	0.0139562	0.0127759	0.0142866	0.0131897	0.013547	0.0136629	0.0144795	0.0136314	0.014264	0.0114957	0.0131247	0.0137796	0.0135214	0.0140862	0.0144784	0.0168509	0.0132227	0.013001	0.0136777	0.0133944	0.0131827	0.0140351	1	0.0132931	0.0130101	0.0130131	0.0122623	0.0126798	0.0130509	0.0131358	0.0128985	0.0159643	0.0143377	0.0129717	0.0148472	0.0125329	0.0129378
0.0134069	0.0145438	0.013725	0.0134843	0.013884	0.014049	0.015164	0.0141456	0.0139912	0.0135867	0.0134897	0.0135067	0.0134039	0.0132222	0.0133132	0.0149415	0.014102	0.0148442	0.0133979	0.0139109	0.0140403	0.0133366	0.0121332	0.0140654	0.0135449	0.0135355	0.0135379	0.013503	0.0126982	0.0138379	0.0133574	0.0138177	0.013693	0.0138339	0.014001	0.0132931	1	0.0140477	0.0134955	0.0127677	0.0137299	0.0133759	0.0140201	0.0137783	0.0241075	0.0138597	0.0138829	0.0150392	0.0132401	0.0139897
0.0139429	0.0135249	0.0132598	0.0137999	0.0130241	0.0129422	0.0130428	0.0147104	0.0145501	0.0138976	0.0143985	0.0146377	0.014618	0.0127764	0.0161067	0.0159566	0.0135243	0.015897	0.0131829	0.0128288	0.0142843	0.0128879	0.0121808	0.0180539	0.0131066	0.0139607	0.013361	0.0129417	0.0132821	0.0137004	0.0128874	0.0142979	0.0140788	0.0142642	0.0139252	0.0130101	0.0140477	1	0.0135248	0.0135949	0.0132573	0.0128762	0.0135664	0.0134779	0.0176477	0.0135954	0.0142202	0.0167953	0.0132055	0.0132127
0.0131605	0.0140295	0.0143269	0.0148367	0.0141792	0.0135559	0.0138379	0.0145206	0.014095	0.013944	0.0137583	0.0132939	0.0135441	0.0131989	0.013618	0.0144865	0.0143156	0.0140528	0.0139441	0.0139391	0.0138537	0.014996	0.0129563	0.0137643	0.0139565	0.01371	0.0139289	0.0134007	0.0124798	0.0154029	0.0152738	0.0166132	0.0152224	0.0143347	0.0144279	0.0130131	0.0134955	0.0135248	1	0.012975	0.0135816	0.0154247	0.0139647	0.0138018	0.0124943	0.01361	0.0141475	0.0162967	0.0143292	0.0136251
0.0125924	0.0120373	0.0136315	0.0127185	0.0123357	0.0122347	0.0126382	0.0139294	0.0133526	0.0131188	0.0133851	0.013096	0.0130778	0.0120246	0.0134682	0.0137664	0.0125535	0.0131875	0.0123261	0.012065	0.0134964	0.0122188	0.0116975	0.0130408	0.0125348	0.0130683	0.0126128	0.0122677	0.0116951	0.012911	0.0122007	0.0132513	0.0130007	0.0131301	0.012929	0.0122623	0.0127677	0.0135949	0.012975	1	0.0127118	0.0122696	0.01223	0.0133415	0.0116189	0.0123721	0.0132945	0.0167901	0.012975	0.0129677
0.014491	0.0139093	0.0131785	0.0137313	0.0134372	0.013662	0.0139999	0.0158219	0.0152215	0.0139646	0.014767	0.0135528	0.0139139	0.0128796	0.0134785	0.0139818	0.0131524	0.0134879	0.0134362	0.0130712	0.0140749	0.0129901	0.0156922	0.0133711	0.0135349	0.0137506	0.0135952	0.0133524	0.0124341	0.0139021	0.0135793	0.0144629	0.0139975	0.0144756	0.0139592	0.0126798	0.0137299	0.0132573	0.0135816	0.0127118	1	0.0133947	0.0137473	0.015275	0.0122676	0.0134895	0.0144268	0.016548	0.0141614	0.014951
0.0126339	0.0137877	0.0153785	0.014907	0.0140258	0.0132695	0.0139113	0.0138006	0.0133088	0.0132695	0.0128827	0.0126367	0.0127619	0.0130888	0.0129084	0.0138988	0.0137863	0.013194	0.0137866	0.0140104	0.0134467	0.0148467	0.012068	0.0130108	0.0138211	0.0133966	0.01344	0.0133116	0.0120504	0.0145461	0.0156264	0.015201	0.0145996	0.013467	0.0138879	0.0130509	0.0133759	0.0128762	0.0154247	0.0122696	0.0133947	1	0.0140559	0.0130404	0.013613	0.0133636	0.0133971	0.0147405	0.0136294	0.0131268
0.0134428	0.0151384	0.0139099	0.0141789	0.0138797	0.0137613	0.0144959	0.0147183	0.0142606	0.0142084	0.0137268	0.0133501	0.0136384	0.0132597	0.0128888	0.0142839	0.0136427	0.0135687	0.0140201	0.014501	0.0142786	0.0141026	0.0124008	0.0134413	0.0142022	0.0138206	0.01349	0.0137853	0.0125441	0.0142333	0.0142801	0.0143689	0.0141305	0.0141418	0.0141284	0.0131358	0.0140201	0.0135664	0.0139647	0.01223	0.0137473	0.0140559	1	0.013604	0.0124975	0.0137274	0.0140063	0.0155378	0.0135433	0.0135
0.0142355	0.0137189	0.0135031	0.013708	0.0134427	0.0140983	0.013705	0.0158807	0.0153345	0.0143533	0.0150071	0.01426	0.0146789	0.0130158	0.0138564	0.0141838	0.013457	0.0137528	0.0135296	0.0133158	0.0143115	0.012927	0.017298	0.0135665	0.0137486	0.0142702	0.0143847	0.0133513	0.0125601	0.0138717	0.0133113	0.0142486	0.0142327	0.0152576	0.014124	0.0128985	0.0137783	0.0134779	0.0138018	0.0133415	0.015275	0.0130404	0.013604	1	0.0124882	0.0136505	0.0151743	0.01723	0.0147448	0.015379
0.0127519	0.0226854	0.0122227	0.0155216	0.0141651	0.0126631	0.0124297	0.0132823	0.0134355	0.0127157	0.0127829	0.0131157	0.0130403	0.0158167	0.0124101	0.0162263	0.0164147	0.0170101	0.0144216	0.0170506	0.0141932	0.0123875	0.0115241	0.0177046	0.0147753	0.0127517	0.0128109	0.0169628	0.0124237	0.0125038	0.0122172	0.0131055	0.0132745	0.0138077	0.013466	0.0159643	0.0241075	0.0176477	0.0124943	0.0116189	0.0122676	0.013613	0.0124975	0.0124882	1	0.013961	0.0135651	0.0135623	0.0121705	0.0122449
0.0134001	0.014297	0.0137772	0.013608	0.0148063	0.0141913	0.0144732	0.0143033	0.0140688	0.0134349	0.0133473	0.0137008	0.0136094	0.0140067	0.0135384	0.0153775	0.0139875	0.0143624	0.0141171	0.0147638	0.0143345	0.0143182	0.0124014	0.0138237	0.0145669	0.0139678	0.0138868	0.0142035	0.0133269	0.0139962	0.0137419	0.0143598	0.0142937	0.0139217	0.0150444	0.0143377	0.0138597	0.0135954	0.01361	0.0123721	0.0134895	0.0133636	0.0137274	0.0136505	0.013961	1	0.0138688	0.0155297	0.0134284	0.0135454
0.0139941	0.0140484	0.0132024	0.013912	0.0135836	0.0138501	0.0138165	0.0159821	0.0151945	0.0150196	0.0146868	0.0141785	0.0146935	0.0132044	0.0139357	0.0148339	0.0138224	0.0143317	0.0137085	0.0135149	0.0147958	0.0133055	0.0146729	0.0142989	0.0137729	0.0139432	0.0136065	0.0137274	0.0127369	0.0142911	0.013577	0.0147413	0.0143842	0.0160333	0.0143277	0.0129717	0.0138829	0.0142202	0.0141475	0.0132945	0.0144268	0.0133971	0.0140063	0.0151743	0.0135651	0.0138688	1	0.0178118	0.0145178	0.014714
0.0154056	0.0151407	0.0143933	0.0154554	0.0152102	0.0149392	0.0148313	0.0200336	0.0184706	0.0174986	0.0173171	0.0168792	0.0171701	0.014785	0.0192523	0.0179024	0.015143	0.016996	0.0155947	0.0149234	0.0175497	0.0145322	0.0142882	0.0168925	0.0152968	0.0161131	0.0158486	0.0156869	0.0145029	0.0165336	0.0149385	0.0175007	0.0171479	0.0176612	0.0167213	0.0148472	0.0150392	0.0167953	0.0162967	0.0167901	0.016548	0.0147405	0.0155378	0.01723	0.0135623	0.0155297	0.0178118	1	0.0165433	0.0170019
0.0135047	0.0136817	0.0133653	0.0146548	0.0132412	0.0133871	0.0135732	0.0149828	0.0144488	0.0147933	0.0135777	0.013372	0.0136134	0.0131198	0.0137077	0.0143275	0.0137388	0.0136762	0.013516	0.0133681	0.0138954	0.0130582	0.0143056	0.0134194	0.013394	0.0134152	0.0134648	0.013248	0.0121343	0.0142377	0.0135664	0.0148059	0.0142598	0.0145203	0.0138937	0.0125329	0.0132401	0.0132055	0.0143292	0.012975	0.0141614	0.0136294	0.0135433	0.0147448	0.0121705	0.0134284	0.0145178	0.0165433	1	0.0141167
0.0144975	0.0141477	0.0134282	0.0137126	0.0135324	0.0137232	0.0144079	0.0155602	0.014854	0.0141095	0.0145563	0.0137403	0.0142952	0.0130641	0.0143373	0.0139348	0.0132832	0.0134708	0.0133971	0.0133435	0.0142307	0.0127372	0.0154097	0.013586	0.0136415	0.0140332	0.013476	0.0133843	0.0125941	0.0137662	0.0135721	0.0140602	0.0140372	0.014618	0.0139273	0.0129378	0.0139897	0.0132127	0.0136251	0.0129677	0.014951	0.0131268	0.0135	0.015379	0.0122449	0.0135454	0.014714	0.0170019	0.0141167	1
0.0142296	0.0141466	0.0138273	0.0143174	0.013508	0.014025	0.0135931	0.0161507	0.015675	0.0153807	0.0155971	0.0150399	0.0149221	0.0128548	0.0141924	0.0143491	0.013448	0.0140122	0.0136954	0.013417	0.0149855	0.0128867	0.0218313	0.0140417	0.013994	0.0148054	0.0155569	0.0140161	0.0127831	0.0142445	0.0133895	0.0147163	0.0141369	0.0152175	0.0143233	0.0131812	0.0139292	0.0140889	0.0139755	0.0133841	0.0150729	0.0131711	0.0138582	0.0154155	0.0126831	0.0136098	0.015203	0.0198804	0.0150016	0.0145272
0.0136001	0.0132516	0.0131428	0.0140252	0.0135622	0.0142311	0.0135083	0.0158405	0.0148404	0.0152937	0.0148237	0.0143509	0.0146012	0.0130933	0.0137216	0.0153157	0.0141497	0.01411	0.0136793	0.013799	0.0147262	0.0134622	0.0129876	0.0144909	0.0138773	0.0142342	0.0142677	0.0133935	0.0126901	0.0141645	0.013408	0.0144036	0.0141563	0.0156378	0.0145648	0.0126479	0.0142574	0.0139293	0.013819	0.0132741	0.0145553	0.0130248	0.0137705	0.014622	0.0132808	0.013847	0.0152765	0.0182178	0.0142849	0.0153309
0.0144474	0.0139327	0.013254	0.0138787	0.0132523	0.0137774	0.0134793	0.0160962	0.0154215	0.0150312	0.0149383	0.0140909	0.0145462	0.0128853	0.0144124	0.0145505	0.0138007	0.0139874	0.0134451	0.0133208	0.0145409	0.0131607	0.0164818	0.014082	0.0132788	0.0142181	0.0137776	0.0133096	0.0124236	0.0140768	0.0134498	0.0145748	0.0141198	0.0153714	0.0140534	0.0127097	0.01344	0.0139235	0.0140402	0.0145152	0.0147611	0.0134293	0.013907	0.0152551	0.0125656	0.0133966	0.0154401	0.0182267	0.0148418	0.015098
0.0139812	0.0135861	0.0136438	0.0133856	0.0133615	0.013941	0.0138442	0.0161086	0.0155922	0.0145336	0.0149715	0.0146806	0.0150362	0.0128171	0.0138411	0.014609	0.0134595	0.0137778	0.0134751	0.0131625	0.0145988	0.0127031	0.0155798	0.0136997	0.0135818	0.0138626	0.0143328	0.0136696	0.0123587	0.0139986	0.0131522	0.0146986	0.0143106	0.0151994	0.0140789	0.0127613	0.0136746	0.0135403	0.0138032	0.0133665	0.015078	0.0129888	0.0138621	0.0161679	0.0123114	0.0133968	0.0151091	0.0182584	0.0143892	0.0146193
0.0149697	0.0147711	0.0146207	0.0150288	0.0146202	0.0147005	0.0142655	0.0180535	0.0171418	0.0159059	0.0165391	0.0158687	0.0158305	0.0139725	0.0155405	0.0164457	0.0151481	0.0158879	0.0150181	0.0146293	0.0162446	0.0143288	0.0141331	0.0154068	0.0146628	0.0156804	0.0150878	0.0149373	0.013671	0.015607	0.0147463	0.0163579	0.0158164	0.0167258	0.0157994	0.013928	0.0145147	0.0154862	0.0154598	0.014967	0.0158866	0.014878	0.0150194	0.0165873	0.013374	0.0148476	0.016434	0.021488	0.0160895	0.0154631
0.0147282	0.0131238	0.0125753	0.0131363	0.0129678	0.0138512	0.0139836	0.0157174	0.0151824	0.0152217	0.0144628	0.0147959	0.0145157	0.0125204	0.0130825	0.0141458	0.0130259	0.0135273	0.0129022	0.0127396	0.0138766	0.012441	0.0202984	0.0138425	0.0131483	0.0136137	0.0139324	0.0130861	0.0123528	0.0135493	0.0128612	0.0139693	0.0137113	0.0148637	0.0136541	0.0123304	0.0133014	0.0134567	0.013359	0.0128315	0.0146303	0.0127816	0.0141171	0.0150885	0.0122741	0.0133165	0.0148886	0.0160067	0.0139708	0.0145183
0.0151117	0.0140954	0.0134588	0.014456	0.0141943	0.0143677	0.0141414	0.0183171	0.0168272	0.0160617	0.0156688	0.0156508	0.0158558	0.0135814	0.0147576	0.0158262	0.0143901	0.0153167	0.0143498	0.0139499	0.0157645	0.0135471	0.014284	0.0149891	0.0145109	0.0148482	0.0147164	0.0142761	0.0133649	0.0150826	0.0140817	0.0158647	0.0153974	0.0165696	0.0152782	0.0134605	0.0143484	0.0150124	0.0148815	0.0141938	0.0156886	0.0140546	0.0148154	0.0160709	0.0143628	0.0144252	0.0164254	0.0207272	0.0153067	0.0156687
0.0144521	0.0139803	0.0136147	0.0144114	0.0140199	0.0141521	0.013763	0.0164897	0.0157392	0.0147632	0.0152	0.0143437	0.0146996	0.0132066	0.0142277	0.015046	0.0139353	0.014631	0.0141793	0.0141093	0.0150848	0.0134876	0.0142618	0.0144734	0.0139605	0.0143659	0.0139118	0.0140261	0.0129611	0.0147349	0.0138517	0.0154506	0.0148241	0.0158089	0.0147327	0.0133394	0.0139017	0.0145497	0.0145271	0.0135544	0.0148208	0.0139615	0.0143636	0.0154485	0.0133309	0.0139633	0.0154817	0.018584	0.0146695	0.0146815
0.0145885	0.0131794	0.013587	0.0135633	0.0131931	0.0139499	0.0136441	0.0161645	0.015205	0.0147415	0.0142885	0.0144027	0.0142661	0.0127841	0.0141677	0.0145776	0.013249	0.0136957	0.0133827	0.0129242	0.0141819	0.0130993	0.0180585	0.0139114	0.0132867	0.0137133	0.0140412	0.0131547	0.0127574	0.0138259	0.0131998	0.0144108	0.0140722	0.0150463	0.0138852	0.0128223	0.0136061	0.0140724	0.0137526	0.0131266	0.0148437	0.0133718	0.0135828	0.0155334	0.0125767	0.0134733	0.0149174	0.0166934	0.014307	0.0150583
0.0144406	0.0141494	0.0135271	0.0143408	0.014242	0.0141837	0.0140681	0.0182268	0.0164323	0.0153487	0.0157007	0.0149767	0.0155099	0.0134614	0.0155945	0.0154517	0.0141704	0.0148727	0.0144643	0.0138878	0.0153683	0.0137261	0.0142277	0.0145999	0.0142401	0.0148062	0.0143442	0.0141049	0.0132591	0.0148092	0.0141086	0.0155083	0.0154148	0.016007	0.0150133	0.0132656	0.0139822	0.0146354	0.0146837	0.0137797	0.0154971	0.0138978	0.0143693	0.0156716	0.0132405	0.0143437	0.0159729	0.0199357	0.0151922	0.0173174
0.0136021	0.0136497	0.0129759	0.0129759	0.0137313	0.0141355	0.0134768	0.014426	0.0139871	0.0134735	0.0137102	0.0142737	0.0139456	0.0133848	0.0133535	0.0147435	0.0133922	0.0140406	0.0135298	0.0137827	0.0142735	0.0131025	0.0127866	0.0138499	0.0135558	0.0136092	0.0140149	0.0150442	0.0146482	0.0135718	0.0128688	0.0138882	0.0140144	0.0139284	0.0141175	0.013979	0.0137644	0.0137426	0.0132114	0.0124401	0.013506	0.0129149	0.0132035	0.0137609	0.0128525	0.0139785	0.0138401	0.0164202	0.0133008	0.0134426
0.0131926	0.0134999	0.0127964	0.0131362	0.0137966	0.0137325	0.0134065	0.0142534	0.0139395	0.0140174	0.0134831	0.0137379	0.0135874	0.0129873	0.0131804	0.0148248	0.0135561	0.0138501	0.0134994	0.0134314	0.0139303	0.0131188	0.0123435	0.0135745	0.0135844	0.0135169	0.0139634	0.014624	0.0159296	0.0136226	0.0131393	0.0140525	0.0137991	0.0138887	0.0139972	0.0146465	0.0135653	0.0135703	0.013436	0.0123626	0.0133148	0.0131068	0.0131374	0.0135685	0.0125266	0.0134682	0.0136755	0.0162189	0.0131006	0.0133435
0.0132483	0.0132328	0.0130751	0.0131641	0.0139044	0.0135019	0.0134114	0.0143342	0.0139356	0.0140882	0.0134346	0.0136369	0.0135588	0.0132155	0.0129388	0.0145232	0.0136984	0.0136463	0.0135906	0.0137522	0.0138582	0.0134277	0.0133164	0.0133972	0.0136029	0.0138687	0.0141303	0.014797	0.0150058	0.013794	0.0134309	0.0140924	0.0139566	0.0140159	0.0140747	0.0141612	0.013507	0.0133023	0.0136277	0.0123945	0.0132714	0.0132011	0.0133405	0.0138738	0.0136028	0.0135891	0.0138729	0.0157478	0.0132327	0.013402
0.013132	0.0127519	0.0126007	0.0125297	0.0134905	0.0131916	0.0128037	0.0136204	0.0134448	0.0134406	0.0133694	0.0139896	0.0135368	0.0127882	0.0132178	0.0147397	0.0129015	0.0134035	0.013148	0.013178	0.0135801	0.0128286	0.0132266	0.0133401	0.0133201	0.0133537	0.0144951	0.0148403	0.0162219	0.0129802	0.0124961	0.0132855	0.0133417	0.0135411	0.0137543	0.0146589	0.0130153	0.013406	0.0128121	0.0121848	0.0128372	0.0124045	0.0128928	0.0131887	0.0124489	0.0131571	0.0130927	0.015503	0.0126558	0.012565
0.0137968	0.0136832	0.0135971	0.0136397	0.0153768	0.0142761	0.0140316	0.0146905	0.0144783	0.0138543	0.0140867	0.0142612	0.0140156	0.0146983	0.0135126	0.0155857	0.0143066	0.0141384	0.0145826	0.014753	0.0146058	0.014641	0.0122383	0.0142318	0.0147088	0.0146042	0.0141968	0.0152047	0.0143743	0.0143684	0.0138398	0.0147707	0.0148064	0.0140633	0.0159516	0.0146549	0.013686	0.0139833	0.0139035	0.0125355	0.0136672	0.0136481	0.0139399	0.0138161	0.0136016	0.0169543	0.0139548	0.0161834	0.0135082	0.0135293
0.013049	0.0140179	0.0131132	0.0131703	0.014508	0.013909	0.0139691	0.0136417	0.0131674	0.0129288	0.0129191	0.0127605	0.0128605	0.0148537	0.0127473	0.0141843	0.0134956	0.0135422	0.0134251	0.0141416	0.0134902	0.0139913	0.0123428	0.0133249	0.0140839	0.0132349	0.0132646	0.014112	0.0127594	0.0133355	0.0131589	0.0135486	0.0141714	0.0130638	0.0145114	0.0136547	0.0132353	0.0141648	0.0129383	0.0119875	0.0129631	0.0128256	0.0130733	0.0128036	0.01541	0.0147035	0.0130311	0.0142829	0.0125457	0.012936
0.0130329	0.0127248	0.0126915	0.0128273	0.0131014	0.0133609	0.0132807	0.0140509	0.0139308	0.0134077	0.013237	0.0129815	0.0131886	0.0127403	0.0129335	0.0139434	0.0131049	0.0138554	0.0133403	0.0128424	0.0133837	0.0125597	0.0125808	0.0131829	0.0129611	0.0134793	0.0137889	0.0130557	0.0126072	0.0133246	0.0127272	0.0138457	0.0135977	0.0137153	0.0137402	0.0127084	0.0136384	0.0132786	0.01333	0.0126743	0.0132683	0.0126081	0.0128134	0.0135498	0.0146041	0.0131696	0.0134768	0.0157109	0.0128738	0.0132441
0.0132772	0.0138737	0.0129498	0.0137995	0.0133634	0.0131975	0.0134782	0.0143585	0.0140344	0.0136835	0.0136624	0.0134666	0.0135812	0.0129814	0.0139721	0.0160892	0.0145416	0.0161203	0.0134835	0.0133125	0.0138787	0.0133558	0.0124265	0.0150469	0.0133668	0.013547	0.0136819	0.0130329	0.0125785	0.0137776	0.0132371	0.0142601	0.0139674	0.0143868	0.0139981	0.0128155	0.0148078	0.0168329	0.0138899	0.0126503	0.0131702	0.0130783	0.0132891	0.0134562	0.017443	0.0139415	0.0140714	0.015899	0.0133442	0.013308
0.0147313	0.0140153	0.0143606	0.0130669	0.0125182	0.0132098	0.014067	0.0153626	0.0148185	0.0142388	0.0155388	0.0140208	0.014703	0.0121213	0.0128525	0.014126	0.0127906	0.0130145	0.0128755	0.0123846	0.0138986	0.0121661	0.021863	0.0137238	0.0129085	0.0130678	0.013954	0.0126086	0.0129802	0.0136096	0.0126827	0.0138227	0.0133119	0.0150891	0.0131851	0.012093	0.0148208	0.0135925	0.0130916	0.0129766	0.0145157	0.0126423	0.0128734	0.0155443	0.012549	0.0137076	0.0155	0.0161122	0.0140841	0.0161881
0.0128735	0.0136828	0.0132248	0.0129874	0.0146053	0.0140208	0.0140763	0.0136086	0.0134286	0.0128381	0.0128238	0.0130235	0.013066	0.0137126	0.0127313	0.0149135	0.0139874	0.0139149	0.0138119	0.0143226	0.0137256	0.0142042	0.0116204	0.0134804	0.0141865	0.0135993	0.0134021	0.013792	0.0127742	0.0134411	0.0134013	0.013817	0.0136647	0.0133738	0.0145512	0.0139207	0.0132771	0.0134907	0.0132336	0.0123225	0.0130235	0.0128147	0.0132344	0.0132016	0.0145835	0.0182146	0.0133532	0.015022	0.0127036	0.012861
0.0132453	0.0141937	0.0137527	0.0137685	0.0144671	0.0141596	0.0143759	0.014483	0.0141791	0.0137974	0.013683	0.0137534	0.0137754	0.0138593	0.0134504	0.0153548	0.014041	0.0144404	0.0142306	0.0145871	0.0142868	0.0142141	0.0122836	0.0141403	0.0141313	0.0140614	0.0143846	0.0141081	0.0134924	0.0141697	0.0135902	0.0144709	0.0145066	0.014374	0.0146775	0.0138684	0.0138994	0.0137212	0.0138615	0.0126854	0.0136917	0.0135949	0.0135677	0.0138034	0.0146438	0.0152036	0.0143125	0.0159068	0.0136328	0.0135521
0.0141351	0.0143524	0.0140123	0.0141904	0.0136189	0.0136979	0.0139063	0.0159484	0.0150945	0.0147554	0.0142948	0.014082	0.0142986	0.0129887	0.0136257	0.0140821	0.0135364	0.0139676	0.0137456	0.0133501	0.0143419	0.0136066	0.0150426	0.0137527	0.0137845	0.0138703	0.0137844	0.0134244	0.0125804	0.0141761	0.0138651	0.014578	0.0141544	0.0148695	0.0140983	0.0127696	0.0135704	0.0136936	0.0140007	0.0137504	0.0145776	0.0136544	0.0138487	0.0145853	0.0124412	0.0134289	0.0152135	0.0173824	0.0145093	0.0148774
0.0129052	0.0125756	0.0121048	0.0126825	0.0122588	0.0122687	0.0119212	0.0136652	0.0134466	0.0127588	0.0132288	0.0135821	0.0133783	0.0121012	0.0140872	0.0154453	0.0127915	0.0143576	0.0123742	0.0123157	0.0136218	0.0121169	0.0113006	0.0165345	0.0120881	0.0127632	0.0123733	0.0126688	0.0128769	0.0125792	0.0119892	0.0131232	0.0131672	0.0132221	0.0128905	0.0129621	0.0132383	0.0268194	0.0123804	0.0125799	0.0123579	0.012311	0.0122617	0.0126061	0.0147362	0.0127683	0.013172	0.0154659	0.0121279	0.0124983
0.0126921	0.0150908	0.014212	0.0144883	0.0143642	0.0140599	0.0147908	0.0137238	0.0133418	0.0133155	0.0128489	0.0126781	0.0128762	0.0136347	0.0135067	0.014193	0.0139488	0.0146515	0.0137409	0.0150908	0.0137161	0.0141239	0.0135822	0.0135098	0.0144304	0.0136681	0.0137993	0.0137943	0.0123023	0.0143147	0.0147762	0.0143569	0.0144901	0.0135261	0.0143086	0.0135657	0.0139438	0.0130242	0.0144044	0.0121136	0.012943	0.0143521	0.0145284	0.0128974	0.0125454	0.0145711	0.0133422	0.0146033	0.0132647	0.0135118
0.0142994	0.0139659	0.0132475	0.013891	0.0137195	0.0141412	0.0141697	0.0164687	0.0156412	0.0149233	0.0149582	0.0144727	0.0146302	0.0131103	0.0141815	0.0150095	0.0139214	0.0143917	0.0137426	0.0134886	0.0148649	0.013322	0.015098	0.014081	0.0138721	0.0142763	0.014029	0.0138832	0.0127048	0.0143412	0.0137933	0.0149102	0.0146447	0.015321	0.0145127	0.0132409	0.0140362	0.0139879	0.014177	0.0131516	0.0150005	0.0135202	0.0140002	0.0155412	0.0127139	0.0138811	0.0151095	0.0177771	0.0147606	0.0147434
0.0150442	0.0157964	0.0137884	0.0137857	0.0134129	0.0143162	0.0147313	0.0147247	0.0140908	0.0142176	0.0142557	0.0134037	0.0139105	0.01325	0.0128446	0.0136426	0.0137959	0.0129642	0.0132876	0.0141438	0.0140126	0.0133781	0.0191261	0.0127562	0.013978	0.0139222	0.0147002	0.0131603	0.0122697	0.0142019	0.0141545	0.0144217	0.0138566	0.0140902	0.0138477	0.0131972	0.0146673	0.0126699	0.0140832	0.0121278	0.0144598	0.0134733	0.0138382	0.0143042	0.0118965	0.0135049	0.0139859	0.0156261	0.0136405	0.0147128
0.0128473	0.0118158	0.0111924	0.0120786	0.0114008	0.0115966	0.0113147	0.013515	0.013532	0.0139603	0.0129392	0.0143823	0.0136505	0.0114487	0.012163	0.0136907	0.0119669	0.0126281	0.0116012	0.0110816	0.0123699	0.0109908	0.0119303	0.0131981	0.0114589	0.0120411	0.0118281	0.0114315	0.0114796	0.0119682	0.0113687	0.0130837	0.0124347	0.0136052	0.0121957	0.0114966	0.0121334	0.0138354	0.0118284	0.0124078	0.0120331	0.0112814	0.0116202	0.0125484	0.012889	0.0116338	0.013342	0.0143612	0.0120921	0.0123235
0.0145762	0.0135147	0.0131213	0.0136527	0.0132431	0.0134903	0.0130296	0.0160502	0.0150994	0.0147162	0.0143489	0.0143014	0.0150303	0.0124576	0.0139312	0.0140864	0.0132663	0.0139021	0.0133504	0.0130347	0.0142925	0.0127263	0.0180481	0.0138015	0.0134397	0.0136932	0.0143325	0.0133972	0.0123408	0.013914	0.0130739	0.0144181	0.0140386	0.015407	0.0140867	0.0125283	0.0135583	0.0138924	0.0138222	0.0128043	0.0144453	0.0130176	0.0137356	0.0159766	0.0124166	0.0134323	0.0154294	0.0170302	0.0146016	0.0148519
0.0140532	0.0142037	0.0134786	0.0140838	0.0135616	0.0136192	0.0137194	0.0156528	0.0152288	0.0144893	0.0145545	0.0149787	0.0145576	0.0130824	0.0142409	0.0148241	0.0138177	0.0142316	0.0136112	0.0136606	0.0146536	0.0130042	0.0139023	0.0140473	0.0137229	0.0141386	0.0142988	0.0137718	0.0128599	0.0141342	0.0135608	0.0148509	0.0143846	0.0149703	0.0142296	0.0130895	0.0136408	0.0141122	0.0140302	0.0129805	0.014439	0.0134259	0.0139161	0.0148765	0.0127628	0.0136356	0.0147669	0.0174851	0.0142952	0.0144213
0.0121242	0.0188023	0.0189091	0.0138346	0.0145196	0.0170039	0.0160252	0.0127568	0.0135265	0.0119985	0.0120894	0.0122739	0.0121301	0.0189373	0.0120064	0.0136664	0.014405	0.01192	0.0148049	0.0185718	0.0140619	0.0124485	0.0112943	0.0148609	0.0153559	0.0147129	0.0184651	0.0186168	0.0166847	0.0133708	0.0149807	0.012748	0.0134744	0.0124592	0.0137225	0.0169072	0.0120729	0.0123728	0.0129392	0.0130328	0.0138054	0.0138448	0.0152807	0.0147147	0.0121047	0.014106	0.0124085	0.0134191	0.0118116	0.0142903
0.0147024	0.0130179	0.0126878	0.013084	0.0129198	0.0128913	0.0124993	0.0142745	0.0142272	0.0133673	0.0134893	0.0140774	0.0136913	0.0135786	0.0136605	0.0160543	0.0133446	0.0143531	0.0131933	0.0127117	0.0136968	0.0124713	0.0118821	0.0173916	0.0128321	0.013198	0.0131655	0.0131018	0.0135103	0.0132317	0.0127597	0.0138658	0.0140749	0.013899	0.0136619	0.012525	0.0135219	0.0164472	0.0133637	0.0123992	0.0128094	0.0126019	0.0127411	0.0129375	0.0199478	0.0134089	0.013517	0.0158106	0.0129603	0.012863
0.0138971	0.0140949	0.0133769	0.0142014	0.0142202	0.0138496	0.0141416	0.0151966	0.0146194	0.0140216	0.0138992	0.0135859	0.0138331	0.0133514	0.0135372	0.014572	0.0139641	0.0140618	0.0138981	0.0143819	0.0144148	0.0139582	0.0132036	0.0138323	0.0140364	0.0139147	0.0138881	0.0137213	0.0128134	0.0150036	0.0142467	0.0156635	0.014975	0.0144897	0.0146988	0.0131081	0.0138359	0.0134912	0.0148635	0.0129071	0.0141454	0.0141222	0.0141578	0.0143462	0.012623	0.013924	0.0143892	0.0168872	0.0143103	0.0138828
0.0138111	0.0142574	0.0135357	0.0145283	0.0139746	0.0137408	0.0142855	0.0148949	0.0146289	0.0137889	0.0138885	0.0134514	0.0136623	0.0133447	0.0132157	0.0143376	0.0138784	0.0136373	0.0137263	0.0139623	0.0140738	0.0139521	0.0136781	0.0135946	0.0140529	0.0137973	0.0138593	0.0133931	0.0127179	0.014935	0.0146364	0.0157858	0.0151514	0.0142309	0.0145428	0.012957	0.0134949	0.0134	0.0150846	0.0128895	0.0140398	0.014474	0.0140409	0.0141693	0.0131015	0.0137858	0.0141389	0.0161549	0.0140313	0.013704
0.0146506	0.01395	0.0133226	0.0139607	0.0139742	0.0142562	0.0141686	0.0167868	0.0161983	0.0149153	0.0150355	0.0144584	0.0148485	0.0133655	0.0151681	0.0151096	0.0140801	0.0143269	0.0140195	0.0136076	0.0150901	0.0135428	0.0142509	0.0141932	0.0140799	0.014442	0.0140292	0.0140113	0.013046	0.0145351	0.0137398	0.0151251	0.0147905	0.0153397	0.0148019	0.0134085	0.0141003	0.014149	0.0143576	0.0133736	0.0150636	0.0135442	0.0142534	0.0151867	0.0134126	0.0142423	0.015259	0.0186687	0.014593	0.0147881
0.0145394	0.0140846	0.0132702	0.0141536	0.0138867	0.0140956	0.0140735	0.0172437	0.0169261	0.0151747	0.0156291	0.0144383	0.0148756	0.013367	0.014574	0.0149603	0.0139482	0.0144082	0.0137702	0.0135416	0.0153941	0.0134162	0.0144941	0.0142088	0.0141933	0.0144911	0.01403	0.0140736	0.0133629	0.0144636	0.0137281	0.0151403	0.0147766	0.015571	0.014702	0.013127	0.0139948	0.0143269	0.0143407	0.0140628	0.015477	0.0136679	0.0144325	0.0155006	0.013248	0.0141484	0.0156765	0.0191358	0.0147686	0.0151749
0.0145126	0.0136628	0.0138849	0.0134177	0.0130606	0.0138664	0.013829	0.0158653	0.0157663	0.014812	0.015894	0.0146012	0.0152858	0.0126547	0.0135623	0.0142172	0.0131351	0.0133402	0.0131821	0.0126319	0.0146918	0.0124091	0.0242375	0.0136079	0.0135404	0.0149483	0.0138099	0.0128598	0.0120334	0.0134586	0.0130459	0.0139797	0.0139132	0.0146967	0.0135955	0.0121274	0.0129278	0.0134491	0.0132467	0.0150169	0.015407	0.0126514	0.013572	0.0173726	0.0124347	0.0131018	0.0152038	0.0170132	0.0139753	0.0152709
0.0138487	0.0137652	0.0136924	0.0138801	0.0158231	0.014232	0.0143726	0.0146012	0.0143563	0.0138129	0.0140893	0.0139949	0.014024	0.0142791	0.0133871	0.0154069	0.0142889	0.0139716	0.0144889	0.0152475	0.0143346	0.0148069	0.0125283	0.0139936	0.0147215	0.0144545	0.0142165	0.0147696	0.0146596	0.0144948	0.0141914	0.0154271	0.0148976	0.0140823	0.0160705	0.0142837	0.0138229	0.0137141	0.0142805	0.0126138	0.0136405	0.0139907	0.0140003	0.0138723	0.0135911	0.0149675	0.0139694	0.0161449	0.0135357	0.013832
0.0134175	0.0140932	0.0124617	0.0135309	0.0132187	0.0128239	0.0126891	0.0146181	0.0142298	0.013566	0.0139984	0.0134908	0.0140234	0.0126017	0.0133947	0.0151689	0.0139384	0.0147029	0.0131803	0.012873	0.0136489	0.0131329	0.012186	0.0140816	0.0132193	0.0133344	0.0129253	0.0129315	0.012245	0.0136517	0.0134361	0.0144873	0.0140097	0.0143093	0.0138143	0.0124513	0.0137688	0.0146162	0.0136114	0.012624	0.0134578	0.013254	0.013258	0.0135872	0.0177136	0.0135601	0.0140096	0.0165807	0.0133332	0.0133301
0.0136029	0.014052	0.013676	0.0145358	0.0140447	0.0136154	0.0143075	0.014894	0.0143577	0.0136775	0.0138276	0.0132541	0.0136068	0.0136626	0.0133221	0.0146259	0.0139525	0.0138067	0.0139596	0.0139347	0.0141018	0.0143592	0.0131858	0.0136599	0.0141019	0.0138884	0.0140404	0.0136635	0.0127001	0.0151781	0.0147994	0.016465	0.0153916	0.0142147	0.0145561	0.0130918	0.0134337	0.0134345	0.015434	0.0133445	0.0138376	0.0148986	0.0142955	0.0140039	0.013123	0.0136789	0.0141034	0.0163645	0.0140168	0.0135842
0.0134938	0.0137672	0.0134148	0.013883	0.0140343	0.0139668	0.0141789	0.0150593	0.0144706	0.0141605	0.0137876	0.0135689	0.0137828	0.0135125	0.0133018	0.0148129	0.0138242	0.0140177	0.0141067	0.0140033	0.0142081	0.0136667	0.0128662	0.0138671	0.0137982	0.0140398	0.013554	0.0137841	0.0128695	0.0143363	0.0138189	0.0147961	0.0149351	0.0142265	0.0145377	0.0132476	0.0137624	0.0139915	0.014318	0.0127784	0.0137739	0.0136651	0.0139693	0.0138249	0.0128498	0.013933	0.0142118	0.0166022	0.0138556	0.013805
0.01329	0.015852	0.0135534	0.0138667	0.0133906	0.0142137	0.0138097	0.0141163	0.0136629	0.0137481	0.0137807	0.0134449	0.0135896	0.0139249	0.0128838	0.0135961	0.013554	0.0134427	0.0135261	0.0136756	0.0135087	0.0127451	0.0155766	0.0138522	0.0136663	0.0132452	0.0133736	0.0127937	0.0128821	0.0142138	0.0140089	0.0142728	0.0140992	0.0141712	0.0137482	0.0132389	0.0134158	0.0130098	0.0138351	0.0125001	0.0137596	0.0134303	0.0142976	0.0138369	0.0124548	0.0137328	0.0139844	0.0158248	0.0136326	0.0140397
0.0133537	0.0148816	0.0134061	0.0140243	0.0141394	0.0136585	0.0136231	0.0145482	0.0141442	0.0137067	0.0138194	0.0138222	0.01422	0.0133929	0.0139313	0.0174202	0.0148982	0.0154037	0.0136122	0.0138028	0.0140475	0.0137955	0.0125069	0.014712	0.0138349	0.0139299	0.0139254	0.0139649	0.0129985	0.0136911	0.0132526	0.0141803	0.0142637	0.0141696	0.0143653	0.0132473	0.0145229	0.014974	0.013801	0.0127477	0.0135109	0.0131867	0.0135519	0.013714	0.0173004	0.0142645	0.0140067	0.0161726	0.0134524	0.013373
0.0138814	0.0153447	0.0135299	0.0143472	0.0136101	0.0137025	0.0139514	0.0144988	0.0140312	0.0140971	0.0140137	0.0133033	0.0137227	0.0131428	0.0138141	0.0143811	0.0141905	0.0146596	0.0134944	0.0133272	0.0138323	0.0140788	0.0172716	0.0137715	0.0139443	0.0136611	0.0137184	0.0136411	0.0123128	0.0142687	0.0140541	0.0147686	0.0141661	0.0143827	0.0140321	0.0126227	0.0136688	0.0139728	0.0145716	0.012727	0.0133637	0.013901	0.0142637	0.0136201	0.0129259	0.0136845	0.0142952	0.0160685	0.0135802	0.013544
0.0127799	0.0141636	0.013272	0.0146697	0.0135722	0.0133311	0.0138914	0.0144191	0.0137216	0.0132229	0.013272	0.0130561	0.0131212	0.0130798	0.0131353	0.0141561	0.0136392	0.0134297	0.0136706	0.0138149	0.0135093	0.0135791	0.0125832	0.0133973	0.0135912	0.0135692	0.013889	0.0132847	0.0120488	0.0146224	0.0149198	0.0152307	0.0160224	0.0138466	0.0138385	0.0125478	0.0131919	0.0132269	0.014841	0.0122227	0.0134012	0.0143212	0.0139136	0.0133831	0.0122931	0.013426	0.0138149	0.0156539	0.0137754	0.0136062
0.0139233	0.0151366	0.0150074	0.0136064	0.0152427	0.0147017	0.0157267	0.0136956	0.0136259	0.0135364	0.0134206	0.0130336	0.0130931	0.0155662	0.0132245	0.0144947	0.0139791	0.0135972	0.014599	0.0156105	0.0142551	0.0147078	0.0118369	0.0132531	0.0143322	0.0138369	0.0134813	0.0141522	0.0137627	0.0138112	0.0141224	0.0140455	0.0139133	0.0133217	0.0146226	0.0147753	0.0143725	0.0131366	0.0134969	0.0124429	0.0135958	0.0139238	0.0142048	0.0132064	0.0180193	0.0146356	0.0132933	0.014477	0.01302	0.013774
0.014394	0.0140324	0.0136372	0.0141377	0.0148941	0.0144568	0.0139786	0.0152271	0.0149299	0.0143323	0.0146914	0.014681	0.0143997	0.0145268	0.0151668	0.0159909	0.0148762	0.0147584	0.0146538	0.0144136	0.0149169	0.0143956	0.0126391	0.014646	0.0145893	0.0144326	0.0142369	0.0146756	0.0141277	0.0148136	0.0142338	0.0155168	0.0151345	0.0145387	0.0158921	0.0140486	0.0139042	0.0143512	0.0147373	0.0131918	0.014014	0.0141396	0.0139307	0.0142346	0.0135483	0.0144655	0.0144834	0.0170451	0.0140372	0.013983
0.013622	0.0139129	0.0141052	0.0145633	0.0147178	0.0139397	0.0137351	0.0144861	0.0140658	0.0136792	0.0138826	0.0136025	0.0139969	0.0141847	0.0136107	0.0149611	0.0146975	0.0141295	0.0142211	0.0140711	0.0141915	0.0146553	0.0128357	0.0138567	0.0144145	0.0142861	0.0141288	0.0140041	0.013288	0.0151849	0.0150586	0.0169561	0.0153551	0.0140915	0.0149261	0.0135559	0.0135404	0.013716	0.0161134	0.0134239	0.0136508	0.0151845	0.0139027	0.0137563	0.0132418	0.0140847	0.0139052	0.015822	0.0138885	0.0134642
0.0151191	0.0142672	0.0137489	0.0142941	0.0152206	0.0148805	0.0140615	0.0153854	0.0152798	0.0142036	0.0153141	0.0152687	0.0151296	0.0147174	0.014418	0.0169124	0.0147827	0.0149945	0.0149791	0.0147496	0.0151066	0.0143479	0.0127731	0.0154094	0.0147371	0.0146099	0.0145378	0.0153068	0.0146647	0.0149287	0.0143112	0.0157431	0.0156424	0.0146958	0.0164254	0.014737	0.014377	0.0151304	0.0148005	0.0133056	0.0140646	0.0143194	0.0140124	0.0145445	0.013826	0.0150182	0.014659	0.0174538	0.0144602	0.0141228
0.0140299	0.0138359	0.0134319	0.0137131	0.014443	0.0144545	0.0141344	0.0148109	0.0145703	0.0137953	0.0141597	0.0140205	0.0140899	0.0145484	0.0142829	0.015076	0.0142397	0.0142825	0.0142951	0.01414	0.0145171	0.0140275	0.0128124	0.0140317	0.0144856	0.0141029	0.0143429	0.0145231	0.013434	0.0142678	0.0137214	0.0148276	0.0146215	0.0143382	0.0149875	0.0138379	0.0137956	0.0137481	0.0140279	0.0129399	0.0138946	0.0136211	0.0138908	0.0142187	0.0138053	0.0143526	0.0142586	0.0161796	0.0137526	0.0137877
0.0137487	0.0140902	0.0135081	0.0135276	0.0144699	0.014124	0.0143211	0.0143907	0.0140762	0.0134607	0.0137618	0.0135726	0.0137335	0.0147317	0.0137446	0.0144115	0.0141491	0.0139511	0.0142952	0.0143823	0.0142627	0.0142827	0.0121124	0.0136415	0.0142189	0.0141248	0.0143622	0.014452	0.0133403	0.0141221	0.0137203	0.0146682	0.0141325	0.0139228	0.0146343	0.01373	0.013814	0.0134197	0.0136833	0.0124402	0.0138306	0.0135991	0.0136588	0.013735	0.0146377	0.014218	0.013941	0.0155744	0.0133318	0.0135728
0.0170956	0.0159807	0.0124904	0.0126915	0.014489	0.0152445	0.0146337	0.0144559	0.014894	0.0131715	0.0133853	0.0133544	0.0142547	0.013485	0.0126987	0.013749	0.0128008	0.0127903	0.0134687	0.0143413	0.0142	0.0125925	0.0125676	0.0141883	0.0144607	0.0129793	0.0128934	0.0130189	0.014743	0.0136426	0.0140739	0.014286	0.0135439	0.0134206	0.0141476	0.0136831	0.0143814	0.0131854	0.0130058	0.0120633	0.0161842	0.0135509	0.0127871	0.0160214	0.0123689	0.0137208	0.0135427	0.0152399	0.01371	0.0142794
0.0108418	0.0110329	0.0105408	0.0109973	0.0113676	0.0112239	0.0109062	0.0116353	0.0114974	0.0118736	0.0112011	0.0114095	0.0119214	0.0108606	0.0112213	0.0127178	0.0131625	0.0128094	0.0112311	0.01117	0.0114462	0.0109087	0.0105503	0.0112262	0.0111498	0.0113165	0.0114656	0.0135785	0.0132045	0.0111501	0.0107207	0.0114036	0.0117578	0.0118805	0.0114041	0.0125771	0.0113638	0.0111245	0.0110389	0.0103542	0.0110463	0.0107339	0.0109543	0.0113337	0.0114317	0.0112668	0.0120433	0.0124341	0.0108791	0.010984
0.013254	0.0141158	0.0136211	0.01361	0.0135698	0.0131527	0.0136969	0.0151357	0.0144056	0.0138328	0.0137881	0.0145523	0.014005	0.0131748	0.0140345	0.0164761	0.0141455	0.0146378	0.0134763	0.0133394	0.0140351	0.0129687	0.0130595	0.0144448	0.0135452	0.0138914	0.0132378	0.0134424	0.0131171	0.0139615	0.013188	0.0144467	0.014387	0.0144913	0.0140339	0.0134277	0.0137861	0.0146449	0.0139148	0.0129484	0.0133976	0.0132574	0.0136707	0.0137747	0.0141937	0.0136654	0.0143337	0.0168073	0.0138712	0.0134467
0.013265	0.0142734	0.0136708	0.0143517	0.0138614	0.0145636	0.0147277	0.0148279	0.0143625	0.0136193	0.0137268	0.0135232	0.0135345	0.0134361	0.0138535	0.0143984	0.0136704	0.0139564	0.013968	0.0135797	0.0141066	0.0140545	0.0123924	0.0136815	0.0138602	0.0137372	0.013466	0.0136037	0.0127287	0.0140463	0.0137381	0.0143759	0.0143518	0.0141347	0.0142932	0.0131518	0.0136942	0.0137203	0.0138576	0.0127009	0.0138086	0.0140159	0.013875	0.0136674	0.0148991	0.0139767	0.0141442	0.0163064	0.0135352	0.0138671
0.0143225	0.0136649	0.0136657	0.0135983	0.0149186	0.0139764	0.0141079	0.0142553	0.0141206	0.0134235	0.0140197	0.0140766	0.0139939	0.0145344	0.0136741	0.0153757	0.0141132	0.0141891	0.0142971	0.0145656	0.0143217	0.0142574	0.0126813	0.0143549	0.014522	0.0140421	0.0142395	0.0147939	0.0138332	0.0141355	0.0135681	0.0147613	0.0146009	0.013846	0.0156354	0.0143318	0.013784	0.0138295	0.0139102	0.0129014	0.0134119	0.0135642	0.0132452	0.0137268	0.0151183	0.0145428	0.013651	0.0158338	0.0132487	0.0134516
0.014229	0.0147252	0.0144437	0.0134332	0.0142011	0.0137357	0.0146888	0.0143342	0.0140905	0.0134484	0.0135452	0.0131542	0.0130819	0.0132051	0.0136902	0.0140735	0.0133457	0.0132506	0.0135051	0.0139012	0.0136997	0.0136131	0.0173781	0.0140767	0.0138666	0.0133864	0.0132375	0.0130258	0.0132563	0.0138721	0.0138413	0.0137661	0.0141143	0.0135484	0.0139784	0.0135752	0.0144866	0.013581	0.0135685	0.0125609	0.0141947	0.0139247	0.0137905	0.013506	0.0124826	0.0136666	0.0135422	0.0149804	0.0130544	0.0136488
0.0130256	0.0141777	0.0147582	0.0137994	0.0142665	0.0139569	0.0146842	0.0144359	0.0140115	0.0134365	0.0137198	0.0138372	0.013751	0.0138035	0.0134415	0.0144946	0.0138406	0.0134824	0.0142948	0.0145134	0.0142573	0.0143712	0.0121847	0.0136358	0.0142313	0.0136781	0.0139932	0.014209	0.0130726	0.01421	0.0140258	0.0146272	0.014233	0.0138965	0.0142213	0.013562	0.0142248	0.0133565	0.0139877	0.0127619	0.0135915	0.0140864	0.0139276	0.0134875	0.0149479	0.0138681	0.013815	0.015519	0.0133565	0.0137001
0.0128518	0.0141428	0.0133098	0.014645	0.0135967	0.0133016	0.0139113	0.0143371	0.0137117	0.013307	0.0132204	0.0130395	0.0131246	0.0130512	0.0132166	0.0140315	0.0135788	0.0133836	0.0136746	0.0138475	0.0134428	0.0136472	0.0126274	0.0132996	0.0136251	0.0135662	0.013884	0.0133022	0.012034	0.0146306	0.0148909	0.0152475	0.0163008	0.0138695	0.0138356	0.0126002	0.0132566	0.0131907	0.0148983	0.0121847	0.0134621	0.0143493	0.0138935	0.0134559	0.0122214	0.013439	0.0137972	0.0154081	0.0138359	0.0136644
0.0131728	0.0148509	0.0135884	0.0144046	0.0139866	0.0136524	0.0139914	0.0146198	0.014097	0.0136756	0.0136498	0.01318	0.0135988	0.013192	0.0139508	0.0144769	0.0139498	0.0144398	0.0136053	0.0140213	0.0139227	0.0142615	0.0132061	0.0136933	0.0139733	0.0137456	0.0137636	0.0135293	0.0124263	0.0148252	0.0143865	0.0151676	0.014836	0.0143787	0.0143411	0.0129898	0.013707	0.0135119	0.0152059	0.0126771	0.013586	0.0143096	0.013996	0.0138965	0.0138001	0.0139263	0.014178	0.0159843	0.0140949	0.0136433
0.0142308	0.0139071	0.0137304	0.0136124	0.0137318	0.0140802	0.0139821	0.0159007	0.0153123	0.0144013	0.0149497	0.0148992	0.0147168	0.0130203	0.0143588	0.0143946	0.0136573	0.013687	0.0135001	0.0134976	0.0145984	0.0133563	0.0157415	0.0140815	0.0138419	0.0139538	0.0144432	0.0139334	0.0128334	0.0139716	0.0134145	0.014359	0.0140265	0.0147796	0.0142473	0.0129398	0.0140836	0.0136623	0.0136893	0.013467	0.0147647	0.0132267	0.0139192	0.0151867	0.0125388	0.0137239	0.0148809	0.0172085	0.0142791	0.0146981
0.0143852	0.014046	0.0143507	0.0139686	0.0139039	0.0138593	0.0139088	0.0158263	0.0153662	0.0142948	0.0144336	0.014885	0.0145495	0.0132311	0.0142454	0.0151431	0.0138606	0.0142999	0.0137373	0.0138397	0.0147008	0.0137538	0.0137833	0.014209	0.0139474	0.014142	0.0143482	0.0139429	0.0129061	0.0144845	0.0140095	0.0149872	0.0148314	0.0149721	0.0146284	0.0131012	0.0139055	0.0140519	0.0142764	0.0133342	0.0144202	0.0138665	0.0145405	0.0147068	0.0134528	0.014021	0.0148473	0.0175625	0.0144242	0.014373
0.0125382	0.0142083	0.0142826	0.012562	0.0152912	0.0150896	0.0147795	0.0128219	0.0134081	0.0122505	0.0124614	0.0148981	0.0137028	0.0152052	0.0119234	0.0137858	0.0130947	0.012594	0.0137836	0.0147506	0.0137271	0.0140531	0.0113333	0.0128598	0.0167187	0.0155766	0.0236918	0.0168194	0.0174711	0.0132004	0.0127911	0.0130186	0.0135232	0.0124886	0.0141082	0.0167518	0.0133378	0.0118772	0.012813	0.0117448	0.012076	0.0134048	0.0142704	0.0129884	0.0123477	0.0138488	0.0122297	0.013429	0.0118391	0.012677
0.0125357	0.0123026	0.0124029	0.0130944	0.0132534	0.0125693	0.0135821	0.0137746	0.0130353	0.0128823	0.012462	0.0122435	0.0124356	0.0122713	0.0122152	0.0128408	0.012637	0.0128646	0.012743	0.013353	0.0128824	0.0124426	0.0117225	0.012462	0.0130647	0.0129787	0.0128105	0.0122724	0.0115684	0.0135732	0.0134348	0.0138666	0.0162984	0.0129276	0.0136407	0.0121884	0.0123642	0.01223	0.0138643	0.0126238	0.0134998	0.0129709	0.013434	0.0131284	0.0114655	0.0127985	0.0131078	0.0147815	0.0126735	0.0128154
0.0143405	0.0139547	0.0128386	0.0132836	0.0129326	0.0134685	0.0137201	0.0155823	0.0148646	0.0144638	0.0145295	0.0142114	0.0145043	0.0124626	0.0139072	0.014428	0.0134726	0.0141177	0.0132893	0.0128086	0.0142647	0.0125261	0.0154782	0.0138244	0.0131361	0.0138174	0.013224	0.0130808	0.0123797	0.013768	0.0130844	0.0142338	0.0138561	0.0158894	0.0138742	0.0124057	0.0136762	0.0138596	0.0136126	0.0127817	0.0145976	0.0132458	0.0135568	0.0154196	0.0124454	0.0134266	0.0158228	0.0176649	0.014331	0.0147668
0.0144714	0.01381	0.0134326	0.0140588	0.0138642	0.0140453	0.0139666	0.0168546	0.0156612	0.0147907	0.0152134	0.0145313	0.0148081	0.0131194	0.0145158	0.0149197	0.0136748	0.0142807	0.0139668	0.0135017	0.0148912	0.0133386	0.0144905	0.0139644	0.0139381	0.0140682	0.0138968	0.0138749	0.0129408	0.0143319	0.0139344	0.0148053	0.0146211	0.0152695	0.0144623	0.0129157	0.0140331	0.0137923	0.0141083	0.0135905	0.0154141	0.0135637	0.014078	0.0154696	0.0126833	0.0139783	0.0153414	0.0185092	0.014628	0.0157018
0.0125709	0.0118556	0.0115899	0.0120256	0.0121113	0.0124222	0.0119223	0.0138202	0.0133373	0.0131286	0.0135972	0.0125732	0.0134986	0.01206	0.0128745	0.0131125	0.0123411	0.0131078	0.0121807	0.0119026	0.0129587	0.0118181	0.0117159	0.0136113	0.0123182	0.0128316	0.0127423	0.0123262	0.0121161	0.0124084	0.011962	0.0130834	0.0128921	0.0135373	0.0127956	0.0122849	0.0125059	0.0145321	0.0124421	0.0118265	0.0129216	0.0117348	0.0126358	0.0131019	0.0123549	0.0124746	0.0140717	0.015352	0.0123502	0.0128172
0.0137651	0.0138003	0.0130459	0.0138855	0.013317	0.0135554	0.0134545	0.0157086	0.014959	0.0146678	0.0140632	0.0137753	0.0142382	0.0128611	0.0141294	0.0145368	0.0136407	0.013985	0.0138618	0.0132293	0.0144899	0.0130481	0.0142376	0.0138417	0.0134981	0.014408	0.013627	0.0133484	0.0123356	0.0142078	0.0133495	0.0147027	0.0142553	0.0150292	0.0141671	0.0125696	0.0135032	0.014246	0.0140668	0.013789	0.0142357	0.0133971	0.0138677	0.0149594	0.0125461	0.013522	0.0150982	0.0188211	0.0144649	0.0146337
0.0142677	0.0137388	0.0133939	0.0135053	0.0142113	0.0140196	0.0139227	0.0146956	0.0144216	0.0139738	0.0142681	0.01446	0.0140989	0.0139589	0.0139046	0.0155101	0.0141836	0.0142357	0.0139722	0.014006	0.0145613	0.0135008	0.0131767	0.014142	0.0140478	0.0141272	0.0143592	0.0141019	0.0130307	0.0141204	0.0135003	0.0144865	0.0143255	0.0142127	0.0151209	0.0134921	0.013819	0.0140835	0.013771	0.0127972	0.0137061	0.0134062	0.0136585	0.0139284	0.0144476	0.0142792	0.0140322	0.0164173	0.013652	0.0136319
0.0128568	0.0137045	0.014124	0.0131439	0.0141429	0.0139938	0.014289	0.0137223	0.0134903	0.0129449	0.0130217	0.0131158	0.0129844	0.0146431	0.0128946	0.0145291	0.0143178	0.0136667	0.0139592	0.014262	0.0140578	0.0142168	0.0119619	0.0140514	0.0136599	0.0131167	0.0138828	0.0144852	0.0132101	0.013883	0.013897	0.0137778	0.0136649	0.013446	0.0145068	0.013258	0.0141885	0.0135454	0.0136807	0.0124932	0.0140603	0.0137338	0.0132277	0.0133077	0.0128479	0.0142679	0.0136324	0.0150177	0.0132265	0.0136993
0.0139417	0.0141344	0.01326	0.0138958	0.0136321	0.0137495	0.0137605	0.0155167	0.0147132	0.0144435	0.0143095	0.0138239	0.0141959	0.0130693	0.0138979	0.0145978	0.0139762	0.0141814	0.0139193	0.0137039	0.0146758	0.0136433	0.0140301	0.0137823	0.0140181	0.0139741	0.0143745	0.0139092	0.0126002	0.0144042	0.0137447	0.0151859	0.0145451	0.0151408	0.0143404	0.0133679	0.0135654	0.0134592	0.0140773	0.0128637	0.0142737	0.0134875	0.0138416	0.0145925	0.0126298	0.0138782	0.0150298	0.0171184	0.0141981	0.0140918
0.013868	0.0142627	0.0136976	0.0137958	0.014025	0.0141157	0.0147452	0.0145846	0.014197	0.0138073	0.0138843	0.0137958	0.0138329	0.0137436	0.0133354	0.0141099	0.0135797	0.013478	0.0136489	0.0138686	0.014284	0.0136761	0.0153133	0.0135106	0.0142071	0.0138261	0.0148202	0.0141374	0.0129054	0.0138991	0.0136794	0.0140945	0.0141344	0.0142619	0.0142615	0.0133784	0.0139803	0.0131919	0.0135885	0.0124962	0.0139975	0.0132576	0.0143341	0.0140712	0.0125266	0.0138917	0.0140948	0.0155247	0.0137241	0.0144246
0.0118636	0.0125698	0.0177425	0.0170767	0.0131317	0.0139299	0.0151207	0.0128412	0.0125745	0.014997	0.0157143	0.0145238	0.0135186	0.0118855	0.0121124	0.0131681	0.0140493	0.0124491	0.0133131	0.012378	0.0129575	0.022538	0.011896	0.0128413	0.0158175	0.0123812	0.0123377	0.0121667	0.0115356	0.0145825	0.0162143	0.0138003	0.0137163	0.0132169	0.0132503	0.0117634	0.0146668	0.0140595	0.0143156	0.0156496	0.0121627	0.014994	0.0173243	0.0123211	0.0116791	0.0128875	0.0131303	0.0135921	0.0135841	0.012108
0.013437	0.0139855	0.0129137	0.0137521	0.0132105	0.0133165	0.0129814	0.0150182	0.0142965	0.0138414	0.01373	0.0139063	0.0138303	0.0129448	0.01432	0.0153375	0.0136969	0.0149516	0.0136574	0.0131272	0.014045	0.0129292	0.0136216	0.015538	0.0131127	0.0141102	0.0137863	0.0135579	0.0128729	0.0136304	0.0130179	0.0143809	0.0145205	0.0144137	0.0140922	0.0129224	0.0135907	0.0178219	0.0139807	0.0141771	0.0139699	0.013177	0.0135348	0.0142365	0.0138116	0.0136305	0.0143395	0.0172413	0.0135647	0.0137532
0.0128638	0.0142317	0.0126934	0.0133764	0.0131784	0.0129475	0.0131259	0.0147461	0.0138482	0.0133462	0.0137598	0.0135682	0.0138302	0.0128443	0.0134512	0.0167353	0.0145368	0.0200905	0.0130868	0.0137365	0.0138349	0.0132421	0.0120374	0.0143696	0.0131741	0.0134355	0.0130101	0.0130319	0.0121158	0.0132963	0.0126241	0.0139475	0.0139906	0.014295	0.0136141	0.0127596	0.0145073	0.0148851	0.0135984	0.0128394	0.0131131	0.012891	0.0133078	0.013329	0.0186978	0.0136954	0.0140592	0.0168121	0.0131623	0.0131103
0.0138147	0.015268	0.0141964	0.0140165	0.0138737	0.0140643	0.014793	0.0153219	0.0145775	0.0137538	0.0138339	0.0135666	0.0136045	0.0132883	0.0132734	0.0139022	0.013623	0.0132574	0.013447	0.0137857	0.01388	0.0139433	0.0161086	0.0133941	0.0141545	0.0135762	0.0136122	0.013308	0.0125331	0.0141603	0.0142412	0.0142544	0.0140381	0.0138379	0.0138875	0.0129127	0.0146412	0.0132758	0.0140853	0.0130373	0.0148734	0.0138027	0.0141631	0.0144305	0.0122676	0.013541	0.0139722	0.0156657	0.0138765	0.0143995
0.014427	0.0140543	0.0135712	0.0135378	0.0134873	0.0137971	0.0138511	0.0160207	0.0157172	0.0144538	0.0147968	0.0142287	0.0142546	0.0133243	0.0140194	0.014036	0.0133235	0.0135485	0.0135399	0.0133301	0.0144421	0.013213	0.0165559	0.0138211	0.013668	0.0140225	0.0137015	0.0133545	0.01277	0.0138641	0.0133093	0.014218	0.0140298	0.0148761	0.0140457	0.0129061	0.0136835	0.013619	0.0138961	0.0136784	0.0153433	0.01311	0.0138276	0.0155384	0.0123159	0.0135263	0.0150181	0.0179393	0.0142594	0.0148744
0.0134652	0.0147937	0.0130257	0.0136576	0.0141991	0.0136739	0.0130679	0.0150096	0.0144757	0.0139154	0.0139711	0.01377	0.0139275	0.0133724	0.0139485	0.0165391	0.0161159	0.0146911	0.0136878	0.0138489	0.0139578	0.0131849	0.0125328	0.0147598	0.0137099	0.0147319	0.0135494	0.0134535	0.0126117	0.0137588	0.0136924	0.01458	0.0144073	0.014955	0.0142263	0.0128558	0.0135046	0.0138957	0.0142375	0.0127932	0.0135261	0.0137356	0.0133733	0.0138315	0.0140967	0.0140969	0.0147995	0.0177821	0.01362	0.0135126
0.0141473	0.0146892	0.0129798	0.013801	0.0135263	0.0134716	0.0132395	0.0150416	0.0144671	0.0142938	0.0139931	0.0133567	0.0140011	0.0128399	0.0130474	0.0142897	0.0136031	0.0135453	0.0131968	0.0137132	0.0140792	0.0132659	0.0205598	0.0134577	0.0137034	0.013562	0.0138094	0.0140169	0.012314	0.0141902	0.0134617	0.0145467	0.0137958	0.0151594	0.0138616	0.0127989	0.0131914	0.0130635	0.013735	0.0124576	0.0145404	0.0130679	0.0141853	0.0148681	0.0121976	0.0133951	0.0149681	0.0161744	0.0140311	0.0142458
0.0145439	0.0146022	0.0133842	0.0144111	0.0139875	0.0141183	0.0138898	0.016871	0.0160019	0.0155008	0.0153243	0.014806	0.0152874	0.0135735	0.0148081	0.015703	0.0143716	0.0153009	0.0141975	0.0140035	0.0155004	0.0136418	0.0142494	0.0148088	0.0141559	0.0145481	0.0145171	0.0142526	0.0133042	0.0149674	0.0138232	0.0156621	0.015226	0.0177512	0.0151829	0.013393	0.0141307	0.0147954	0.0148343	0.0137339	0.0148589	0.0138473	0.0146251	0.0157794	0.0136461	0.0143464	0.0169612	0.0195204	0.0149383	0.0149983
0.014403	0.0143863	0.0135413	0.0146178	0.0141451	0.0144292	0.0141322	0.0171614	0.0162824	0.0155868	0.0156533	0.0154194	0.0156574	0.0135944	0.014771	0.0158981	0.0149057	0.0153855	0.0143717	0.0141049	0.0156123	0.0139028	0.0142023	0.0151378	0.0141737	0.0147873	0.0145263	0.0143565	0.0133921	0.0151855	0.0140365	0.0160278	0.0154166	0.0175382	0.0152226	0.0134951	0.014173	0.0150205	0.0150396	0.0139589	0.0150876	0.0138984	0.0145757	0.0158698	0.0144138	0.0145148	0.0172773	0.020109	0.0151838	0.0151833
0.0130561	0.0145127	0.0136978	0.0142756	0.0141947	0.0139624	0.0143154	0.0141076	0.0137918	0.01351	0.0134035	0.0133139	0.0133505	0.01378	0.0130382	0.0142335	0.0140454	0.0135232	0.0139668	0.0147291	0.0139768	0.0142434	0.0122771	0.013255	0.0141965	0.0137954	0.0140447	0.0142964	0.0126982	0.014418	0.0142067	0.0148255	0.0145074	0.0139	0.0141818	0.0135155	0.013758	0.0129497	0.0144261	0.0123707	0.0132443	0.0141201	0.0144273	0.0133836	0.0144591	0.0140845	0.0137412	0.0152834	0.0137021	0.0135448
0.0124179	0.0144724	0.0166209	0.0155843	0.0132682	0.0137452	0.0135351	0.0139341	0.0135736	0.0130271	0.01388	0.0125637	0.0130988	0.013282	0.0127343	0.0132309	0.0145101	0.0130687	0.0143027	0.0140583	0.0135445	0.015943	0.0122681	0.0130765	0.0148929	0.0138774	0.0142567	0.0140377	0.0129724	0.0143047	0.0145373	0.0154204	0.0142256	0.0140182	0.0135187	0.0132897	0.013196	0.0128991	0.0145483	0.0131819	0.0127945	0.014139	0.0150342	0.0129833	0.0119187	0.0130324	0.0137029	0.0154028	0.0142692	0.0132715
0.0123032	0.0153001	0.0127402	0.0135745	0.0132893	0.0134326	0.0138523	0.012838	0.0128286	0.0122023	0.0123807	0.0124584	0.0130174	0.0140735	0.0123947	0.0144089	0.0136193	0.0127208	0.0131498	0.0134047	0.0130696	0.0134269	0.0112464	0.0137218	0.0133353	0.0128868	0.0124179	0.0129609	0.0122493	0.0130146	0.0128604	0.0130815	0.0128826	0.0127998	0.0140232	0.0128888	0.013255	0.0132051	0.0127388	0.0115615	0.0121055	0.012735	0.0133819	0.0125793	0.0228252	0.0134231	0.0125675	0.014459	0.0122405	0.0127144
0.0129594	0.0140161	0.0146811	0.0145815	0.0138185	0.013519	0.0139605	0.0143558	0.013882	0.0137127	0.0136138	0.0131923	0.0132984	0.013185	0.0134176	0.013892	0.0135721	0.0134939	0.0139459	0.0138194	0.0135357	0.0138625	0.0134168	0.0131382	0.0138205	0.0136225	0.0137793	0.0132176	0.0122522	0.0145889	0.0149345	0.0151253	0.0146705	0.0137906	0.0139759	0.0128107	0.0134196	0.0129633	0.0148957	0.0126986	0.0135938	0.0147443	0.0141431	0.0137555	0.0122686	0.0134717	0.0139078	0.0159253	0.0141747	0.0138183
0.015413	0.013362	0.0140842	0.01329	0.0131977	0.0137868	0.0134072	0.0155888	0.0153347	0.0149329	0.015302	0.015311	0.0154588	0.0126917	0.0134837	0.0143595	0.0130706	0.0134442	0.0130707	0.0130609	0.0141419	0.0128108	0.0194764	0.0136487	0.0134352	0.0142348	0.0143806	0.0133766	0.012615	0.0137495	0.0131826	0.01399	0.0140364	0.0147976	0.0139996	0.0127074	0.0136109	0.0135077	0.0135385	0.0139682	0.0143704	0.0129224	0.0134779	0.0158095	0.0123404	0.0133737	0.0146651	0.0170649	0.0141153	0.014665
0.013279	0.0143222	0.0149872	0.0146352	0.0139323	0.0135104	0.0138716	0.0143257	0.0139675	0.0135628	0.0135282	0.0133622	0.0134214	0.0131932	0.0135743	0.0139934	0.0138365	0.0133616	0.0137214	0.0136919	0.0137184	0.0141288	0.0127309	0.0134281	0.0138693	0.0135747	0.0137149	0.0133398	0.0126274	0.0147631	0.0150498	0.0156518	0.0148885	0.0138688	0.0141174	0.0130861	0.0136289	0.0135946	0.0154604	0.0126717	0.0135738	0.0154472	0.0141975	0.0136845	0.012328	0.0135264	0.0138317	0.0156742	0.0139747	0.0136523
0.0139494	0.0149515	0.014118	0.0166483	0.0146139	0.0139505	0.0140579	0.0157525	0.0151453	0.0148813	0.0142465	0.0141986	0.014399	0.01376	0.0145246	0.01545	0.0146717	0.014972	0.0148152	0.0145493	0.0144928	0.014473	0.0137988	0.0146939	0.0142352	0.0142566	0.0147607	0.0139686	0.0133819	0.0152663	0.0147779	0.0164296	0.0157096	0.0155545	0.0152063	0.0137206	0.0137874	0.0143226	0.015722	0.0133714	0.0144472	0.0150318	0.0143341	0.0147642	0.0147963	0.0142752	0.0150909	0.0182827	0.0151751	0.014211
0.0157148	0.0141475	0.0127438	0.0134841	0.0134262	0.0136415	0.0132373	0.0152146	0.0150333	0.0145847	0.0144875	0.0142722	0.0146499	0.0128035	0.0133226	0.0143192	0.0134908	0.0142361	0.0133552	0.0132554	0.0146457	0.0126692	0.0152137	0.0136151	0.0139489	0.0147309	0.0138162	0.0133935	0.0130278	0.0137835	0.0132901	0.0144257	0.0143264	0.0147289	0.0140805	0.0127024	0.0137934	0.013801	0.0137931	0.0131231	0.014213	0.012907	0.0134857	0.0155106	0.0125588	0.0133677	0.0147435	0.0173389	0.0142315	0.0145046
0.0124261	0.018969	0.0137002	0.0144513	0.0138042	0.0132578	0.0136442	0.0138528	0.0134425	0.0151621	0.0128444	0.012569	0.0139358	0.0127517	0.0126099	0.0136703	0.0148338	0.0130864	0.0138962	0.0161584	0.0133071	0.0128853	0.0124266	0.0134768	0.014011	0.0127729	0.0126912	0.0124584	0.0117351	0.0139995	0.0138938	0.0141595	0.0137164	0.0138365	0.013519	0.0134114	0.0134847	0.0133033	0.0140313	0.0117999	0.0138551	0.0142678	0.0166808	0.0137741	0.0122201	0.013193	0.0142683	0.0143855	0.0139351	0.0142537
0.0143458	0.0135699	0.0130584	0.0138319	0.01362	0.0139602	0.0138671	0.0161093	0.0153091	0.0146512	0.0147004	0.0139414	0.0144538	0.0129646	0.0142259	0.014648	0.0135454	0.0139529	0.013552	0.0132104	0.0146779	0.013028	0.0154378	0.0138831	0.013645	0.0139205	0.0136045	0.0133782	0.0127909	0.0138957	0.0133773	0.0145118	0.0141035	0.0149366	0.0142582	0.0128342	0.013995	0.0138599	0.0137468	0.0137261	0.0147283	0.0131498	0.0137628	0.015007	0.0140594	0.0137026	0.0151449	0.0179884	0.0143597	0.0156604
0.0129189	0.012906	0.0125614	0.0125271	0.0129811	0.0133301	0.0133553	0.0143881	0.014044	0.013089	0.0134238	0.0131682	0.0133097	0.0129946	0.0135283	0.0145027	0.0128375	0.0140157	0.0128314	0.012512	0.0135374	0.0126016	0.011822	0.0133539	0.0127865	0.0132015	0.0129792	0.0130016	0.013993	0.0129076	0.0127267	0.0130794	0.0135836	0.0132792	0.0138129	0.0129754	0.0137733	0.0134341	0.012788	0.0127081	0.0132775	0.0123957	0.0126087	0.0130686	0.0124435	0.0130641	0.0134753	0.016784	0.0127552	0.0138854
0.0133683	0.013131	0.0131296	0.0131298	0.0133312	0.013316	0.0132375	0.0147278	0.01415	0.0138702	0.0138086	0.0138602	0.0138428	0.0131473	0.0135617	0.0142156	0.013258	0.0135245	0.0132036	0.0133689	0.0139399	0.0129857	0.0128797	0.0139062	0.0138099	0.0136572	0.0137628	0.0143129	0.0141467	0.0134116	0.0129009	0.0143645	0.0137153	0.0140215	0.013896	0.0140014	0.0131339	0.0143068	0.0134173	0.013073	0.0134024	0.0132262	0.0132584	0.0136151	0.0145043	0.0136372	0.0138175	0.0166112	0.0133672	0.0133336
0.0132132	0.0133855	0.0134342	0.0133053	0.0143992	0.0138476	0.0136324	0.0142657	0.0140093	0.0136732	0.0134165	0.0135672	0.0136368	0.0136468	0.0134757	0.0144952	0.0136624	0.0136391	0.0137449	0.0142243	0.014186	0.0138098	0.0129421	0.0136357	0.0137927	0.0138442	0.0140553	0.0146541	0.0161418	0.0137432	0.0133169	0.0142465	0.0141178	0.0139664	0.0146537	0.014739	0.0134754	0.0133611	0.0135998	0.0124407	0.0135093	0.0133326	0.013399	0.0139093	0.0138488	0.0141587	0.0138488	0.0156598	0.0132403	0.0132944
0.0136594	0.0136546	0.0130632	0.0135692	0.0141858	0.0143066	0.0137683	0.0149484	0.0145724	0.0142383	0.014053	0.0141144	0.0140749	0.0137665	0.0134765	0.0150446	0.0140003	0.0146507	0.0143061	0.0142435	0.0145542	0.0136867	0.0130554	0.0142812	0.0140975	0.0139378	0.0142188	0.0152751	0.0153926	0.014276	0.0134023	0.0146765	0.0146109	0.0145149	0.0148518	0.0142533	0.0138103	0.0138868	0.0139055	0.0127458	0.0137169	0.0133931	0.0136435	0.0139699	0.0137123	0.014326	0.0142622	0.0171955	0.013767	0.0137897
0.0141067	0.0139263	0.0130577	0.0132885	0.0135883	0.0138931	0.0137083	0.0149032	0.0147165	0.0142578	0.0142399	0.0139245	0.0141533	0.0131451	0.0129126	0.0141144	0.0132935	0.0134902	0.0136192	0.013797	0.0144138	0.0126812	0.0182954	0.0135026	0.0137602	0.0134868	0.0134344	0.013308	0.0124434	0.0139086	0.013247	0.0143664	0.0138633	0.0146586	0.0138766	0.0130077	0.0138719	0.0132407	0.0136732	0.0123164	0.0139547	0.0130141	0.0142012	0.0146495	0.0122855	0.0135101	0.0145824	0.0156555	0.0139488	0.0137623
0.0142199	0.0134447	0.0131517	0.0134709	0.013272	0.0134432	0.0136311	0.0151487	0.0146983	0.0142619	0.0145107	0.0139918	0.0140862	0.0128384	0.0130425	0.0143014	0.0133382	0.0133002	0.0134883	0.0134295	0.0144171	0.0130864	0.0189239	0.0133199	0.013505	0.0140564	0.0132395	0.0132012	0.0121594	0.0137263	0.0132038	0.0143775	0.0138694	0.0148729	0.0138984	0.0127767	0.0130523	0.0133731	0.0135577	0.0127189	0.0141951	0.0131156	0.0135937	0.0150082	0.0122135	0.013488	0.0147041	0.0160347	0.0142252	0.01433
0.0135236	0.0138933	0.0137124	0.0143574	0.0135126	0.0134557	0.0136201	0.0152335	0.0146318	0.0145826	0.014098	0.0135363	0.0138494	0.0128939	0.0137126	0.0142669	0.0137141	0.0137026	0.0137261	0.0133858	0.0140189	0.0134515	0.0149496	0.0136037	0.0136206	0.0138016	0.0135193	0.0133225	0.0125339	0.014324	0.0139592	0.0148493	0.0144461	0.0147601	0.0140405	0.0127453	0.0134769	0.0136583	0.0146119	0.0136921	0.0141766	0.0139063	0.0137459	0.0147763	0.0122796	0.0134562	0.014769	0.017017	0.0153595	0.0141272
0.0135639	0.014591	0.0136688	0.0146132	0.013863	0.0137803	0.0142624	0.0150405	0.0145011	0.0140143	0.0139379	0.0138067	0.0139546	0.0132675	0.0139826	0.0143751	0.0137179	0.013909	0.0138441	0.0138289	0.0141856	0.0135508	0.0137447	0.0136873	0.0138707	0.0141954	0.0140539	0.0136042	0.0125573	0.0142041	0.0139977	0.0147702	0.0144173	0.0143323	0.0142109	0.013124	0.0138371	0.0137405	0.0143275	0.0128348	0.0141982	0.0140637	0.0139898	0.0142727	0.0141582	0.0137703	0.014356	0.0162448	0.0140784	0.014078
0.0138323	0.0144892	0.0141036	0.0149419	0.0139295	0.0138916	0.0137912	0.015497	0.0150095	0.0147119	0.0144734	0.0141289	0.0141699	0.0132212	0.014138	0.0146881	0.0139863	0.0143184	0.0140661	0.0138018	0.0143773	0.0141094	0.0138327	0.013961	0.0139999	0.0145965	0.0143178	0.0138887	0.0125511	0.0145833	0.0144268	0.0152654	0.0148482	0.0149283	0.0145052	0.0130748	0.0136415	0.0139683	0.0150184	0.0133205	0.0144386	0.0145179	0.0142606	0.0147383	0.0132281	0.0137752	0.01474	0.017702	0.0146753	0.0143652
0.0131835	0.014335	0.0149284	0.0146343	0.0139327	0.0137022	0.014124	0.0144136	0.0139245	0.013891	0.0134192	0.0131622	0.0133178	0.0131961	0.0131834	0.0138327	0.0136682	0.0134363	0.013745	0.0139148	0.0137241	0.0140791	0.0136446	0.0132524	0.0140412	0.0139965	0.0143284	0.0135353	0.0123011	0.014471	0.0150212	0.0149306	0.0144758	0.014016	0.0140126	0.0129726	0.0134555	0.0130282	0.0148519	0.0126033	0.0139178	0.0150473	0.0144135	0.013881	0.0122156	0.0134903	0.0139356	0.0156331	0.0140253	0.0139714
0.013374	0.0143154	0.014286	0.0148851	0.0140047	0.0138427	0.0136911	0.0150023	0.0144211	0.0142791	0.0136828	0.0139124	0.0139689	0.0132356	0.0143783	0.0146766	0.0139464	0.0144613	0.0139805	0.0137835	0.0141741	0.0141141	0.0139974	0.0136359	0.0139452	0.013969	0.0142525	0.0136092	0.012586	0.0146703	0.0145502	0.0153848	0.014985	0.0145863	0.0144739	0.0128997	0.0135802	0.0136433	0.0150441	0.0129597	0.0140326	0.0145983	0.0142634	0.0140721	0.0132727	0.0137567	0.0143151	0.0166581	0.0145001	0.0138718
0.0129912	0.0144147	0.0144415	0.0149204	0.0139833	0.0137209	0.0138345	0.014551	0.0139743	0.0136754	0.0135516	0.0133847	0.013535	0.0132748	0.0140017	0.0141506	0.0138332	0.0135678	0.0139074	0.0139939	0.0138893	0.0140967	0.0136115	0.0133403	0.0142509	0.0141993	0.0138366	0.0135622	0.0124978	0.0145455	0.0147057	0.0153251	0.0146921	0.0141383	0.014314	0.0129253	0.0134587	0.013142	0.0148768	0.0125338	0.0139669	0.0146818	0.0143112	0.0137802	0.0134281	0.013664	0.0139185	0.0158291	0.0140658	0.0137512
0.0146677	0.0145304	0.0137579	0.0142589	0.0135948	0.0139317	0.0139741	0.0141342	0.0136568	0.0145019	0.0129876	0.0136901	0.0133415	0.0130827	0.0125492	0.0134505	0.0135632	0.0132143	0.0138278	0.0146839	0.0135969	0.0132473	0.0178665	0.0130105	0.0137621	0.0135072	0.0144834	0.0138226	0.0119931	0.013599	0.013769	0.0150331	0.0141639	0.0138225	0.0138488	0.0134162	0.0141293	0.0131249	0.0136135	0.0121404	0.0133613	0.0136755	0.0139181	0.0133641	0.0287607	0.0130995	0.0138743	0.0147232	0.0139162	0.0140866
0.0133684	0.0147569	0.0142266	0.0145482	0.0138511	0.0138631	0.014189	0.0148658	0.0144081	0.01402	0.0135919	0.0135165	0.0136806	0.0132808	0.0133727	0.0140268	0.0137395	0.0137735	0.0137882	0.0138784	0.0140671	0.0136996	0.0149645	0.0135866	0.0139674	0.0143904	0.0140363	0.0134669	0.0124851	0.0141881	0.0141793	0.0146632	0.0143228	0.0143735	0.0140559	0.0131749	0.0136374	0.013401	0.0143186	0.0127391	0.0141184	0.0142455	0.0144631	0.0144581	0.0146097	0.0135632	0.0143536	0.0159989	0.0142218	0.0143411
0.0142592	0.0139171	0.0134859	0.0137727	0.013587	0.0139907	0.0140116	0.0154794	0.0153813	0.0145512	0.0147323	0.0145129	0.0147245	0.0131353	0.0137621	0.01456	0.0138456	0.0141246	0.0138364	0.0134125	0.0144195	0.0132213	0.0156065	0.0138198	0.0135645	0.0142923	0.0135703	0.0135682	0.0126634	0.0138821	0.0132605	0.0143412	0.0141035	0.0150762	0.0142382	0.0128963	0.0138409	0.0137813	0.0139736	0.0128999	0.0144593	0.0133025	0.0137985	0.0154122	0.0145838	0.0135946	0.0146793	0.0169716	0.0144805	0.0144077
0.0134636	0.0140965	0.013478	0.0143677	0.0138244	0.0136584	0.0138232	0.0148603	0.0143574	0.0141542	0.0136774	0.0133763	0.0135838	0.0131824	0.013767	0.0143055	0.0139052	0.0139428	0.0137715	0.0136829	0.0140606	0.0135227	0.0138411	0.0137231	0.0137061	0.0137692	0.0136441	0.013668	0.0126405	0.0143585	0.0140733	0.0147746	0.0143714	0.0144539	0.0141915	0.0129584	0.0140731	0.0135876	0.014386	0.0131282	0.0139883	0.0140369	0.0137853	0.0143288	0.0137697	0.0136976	0.0143952	0.0165423	0.0150549	0.0141152
0.0137736	0.013927	0.0129877	0.013731	0.0136389	0.01367	0.0136838	0.014896	0.014372	0.013841	0.013923	0.0138189	0.013829	0.0136899	0.0152869	0.0157923	0.0140492	0.0158764	0.0135491	0.013591	0.0141255	0.0132228	0.0132402	0.0148671	0.0135082	0.0137119	0.0135881	0.0135993	0.0127522	0.013788	0.0133715	0.0143879	0.0145807	0.0143574	0.0142278	0.0130927	0.014502	0.0148873	0.0136991	0.0131817	0.0136572	0.013218	0.0133744	0.0140366	0.0151855	0.0140052	0.0142276	0.0169456	0.0136667	0.0139524
0.0144307	0.0140213	0.0134119	0.0137801	0.0143673	0.0142287	0.0140343	0.0148589	0.0145847	0.0139596	0.0141945	0.0145311	0.0142522	0.0144302	0.0137546	0.0151547	0.0142436	0.0144526	0.0143528	0.0142213	0.01472	0.0140337	0.0129752	0.0142439	0.0142623	0.014009	0.014241	0.0147528	0.0135349	0.014413	0.0137243	0.0147348	0.0144928	0.014292	0.0150776	0.0136676	0.0139138	0.0141542	0.0141098	0.0129202	0.0137721	0.0135776	0.0138115	0.0141256	0.0141502	0.0143482	0.0141407	0.0162191	0.0139043	0.0137764
0.0139105	0.0137182	0.0137326	0.0135179	0.0151466	0.0143132	0.0139041	0.0145642	0.014397	0.0135918	0.0141926	0.0142402	0.0140446	0.0146626	0.0134851	0.0155297	0.0144136	0.0138719	0.0143565	0.0151503	0.0142891	0.0143344	0.0121283	0.0141021	0.014426	0.0141387	0.0144192	0.0148702	0.0141012	0.0141408	0.0136275	0.0145173	0.0143036	0.0138039	0.0156653	0.0144141	0.0137749	0.0138327	0.013687	0.0127749	0.0134384	0.0135729	0.0135881	0.013819	0.0149954	0.0146411	0.0137102	0.0157908	0.0133095	0.0134051
0.0147653	0.0137163	0.0137006	0.0137908	0.0150018	0.0147342	0.0140616	0.0150615	0.0151091	0.0141275	0.0144953	0.0151709	0.0146734	0.0146788	0.0137345	0.0155687	0.0142283	0.0145743	0.0147777	0.0144984	0.0147991	0.0142029	0.0124843	0.0150704	0.0145722	0.0145498	0.0144283	0.0149756	0.0155095	0.0144963	0.0141187	0.0154176	0.0149482	0.0144059	0.0158065	0.0144045	0.0140866	0.0147516	0.0140793	0.012917	0.0138522	0.0136073	0.0139468	0.0140769	0.015359	0.0149623	0.0142244	0.017108	0.0136018	0.0137358
0.0136834	0.0136984	0.0132956	0.0131966	0.0145151	0.014322	0.013683	0.0142184	0.0141676	0.0134103	0.0137905	0.014361	0.0139139	0.0142923	0.0137358	0.0150656	0.0137173	0.0137049	0.0139671	0.0141451	0.0140631	0.0134882	0.0126437	0.0140815	0.0140381	0.0142634	0.0150098	0.0155546	0.014781	0.0136399	0.0132776	0.0140486	0.0143292	0.0138261	0.0146893	0.0147252	0.0138256	0.0138415	0.0134302	0.0123391	0.0133647	0.0131049	0.0133696	0.0136366	0.0149508	0.0142636	0.0136589	0.0155479	0.0130971	0.0133063
0.0190715	0.0147141	0.0152538	0.0143268	0.0137353	0.0141928	0.0147713	0.0162838	0.0152478	0.0158693	0.0164138	0.0152001	0.0146934	0.0125286	0.0136292	0.0138337	0.0129047	0.0134757	0.0131677	0.0127593	0.0142064	0.01263	0.0351431	0.0139244	0.0134105	0.0140757	0.0146701	0.0130398	0.0123548	0.0140848	0.0136166	0.013815	0.0144075	0.0145233	0.0141958	0.0123657	0.0137329	0.0136544	0.013369	0.0136783	0.0158235	0.0131625	0.0131196	0.0155389	0.0123685	0.0132926	0.0146339	0.0175795	0.014599	0.0181198
0.0133179	0.015484	0.0136064	0.0142377	0.0139145	0.0146251	0.0149878	0.0141798	0.0139924	0.0139842	0.0136968	0.0132719	0.0133618	0.0136556	0.0138881	0.0154797	0.0140017	0.0149962	0.0141111	0.0141289	0.0146514	0.0140684	0.0122803	0.0142343	0.0139675	0.0137091	0.0131444	0.0143326	0.0125805	0.0138348	0.0138005	0.0143815	0.0140677	0.0144606	0.0143546	0.0132042	0.0144909	0.0146493	0.0138519	0.0128822	0.0138117	0.013612	0.0143522	0.0136076	0.0193406	0.014853	0.0140525	0.0154943	0.0134721	0.0138426
0.0125772	0.0125259	0.0136285	0.0128765	0.0126992	0.0128213	0.0132003	0.0142079	0.0137997	0.0134331	0.0137389	0.0137768	0.0135675	0.0124276	0.0138345	0.0141629	0.0127294	0.0132181	0.0124923	0.0125655	0.0135748	0.0122061	0.0123828	0.0131901	0.0127219	0.0132593	0.0132802	0.012525	0.0118505	0.0130517	0.0124534	0.0136352	0.0132336	0.01333	0.0131794	0.0121437	0.0130093	0.0135697	0.0131951	0.0354727	0.0131413	0.0124301	0.0124956	0.0137468	0.0119804	0.0127239	0.013546	0.017016	0.0129837	0.0133706
0.0138006	0.0140465	0.0138066	0.0141192	0.0144504	0.013998	0.0142127	0.0144375	0.0140331	0.0136279	0.0134565	0.0135563	0.0135442	0.0139001	0.013616	0.0148781	0.0140106	0.0138375	0.0139424	0.0143652	0.0141712	0.0140635	0.0129505	0.0138774	0.0143118	0.0138058	0.014087	0.0139141	0.0130934	0.0146079	0.0142172	0.0151784	0.0150655	0.0140463	0.0149017	0.0135654	0.0139311	0.0134409	0.0143414	0.0124031	0.0134726	0.0138603	0.0140627	0.0134962	0.013585	0.0144443	0.0138709	0.0156	0.0134677	0.0134353
0.0135314	0.0140452	0.0135551	0.0142966	0.0139955	0.0138785	0.0141197	0.0149009	0.014427	0.0137725	0.0136691	0.0134742	0.0135631	0.0134049	0.0131755	0.0144899	0.013911	0.013761	0.0138687	0.0144176	0.0140486	0.0141695	0.0136272	0.0137142	0.0141911	0.0138446	0.013748	0.0135822	0.0130174	0.0149546	0.0147788	0.0156706	0.0152904	0.0142411	0.0145784	0.0132557	0.0137414	0.0136025	0.0152379	0.0128763	0.0139106	0.014691	0.0142551	0.0139136	0.0131536	0.0137349	0.0141225	0.0162813	0.0139076	0.0136206
0.0133064	0.0144491	0.0133728	0.0148904	0.0138347	0.0134846	0.0136546	0.0149749	0.014278	0.0142086	0.0143582	0.0133448	0.013672	0.0130199	0.0133437	0.0143866	0.0138245	0.0142192	0.0138168	0.0136805	0.013918	0.0141015	0.013689	0.0136123	0.0138523	0.0139676	0.0138174	0.0132476	0.0124226	0.014785	0.0144719	0.0154204	0.0149969	0.0145408	0.0142836	0.0128328	0.0136738	0.013685	0.0150313	0.0126703	0.0139256	0.01433	0.013931	0.0139924	0.0126215	0.0135698	0.0142509	0.0167344	0.0141977	0.0139182
0.0128858	0.0126465	0.0120203	0.0128849	0.0122489	0.0121458	0.0123478	0.0142474	0.0137813	0.0134009	0.014072	0.0133896	0.0132897	0.0120685	0.0171138	0.0148089	0.0133857	0.015419	0.012426	0.0122504	0.0134882	0.0119278	0.011998	0.0152267	0.012298	0.0128843	0.0124278	0.0127319	0.012273	0.0127378	0.0121558	0.0134715	0.0133518	0.0136948	0.0130807	0.0122001	0.0131819	0.0223112	0.0128202	0.0137021	0.012829	0.0122348	0.0123518	0.0128558	0.0133194	0.0127336	0.0137572	0.017087	0.0131021	0.0125768
0.0134874	0.0147114	0.0139549	0.0134457	0.0143052	0.0141264	0.0142781	0.0147546	0.0141557	0.0137117	0.0136801	0.0136605	0.013776	0.0142811	0.0136294	0.0144758	0.0139148	0.0137264	0.0140067	0.0144333	0.0141552	0.0143446	0.0133968	0.013572	0.0151964	0.0144364	0.0152881	0.0147957	0.013398	0.0138774	0.013552	0.014217	0.0141193	0.014074	0.0145599	0.0142274	0.0135211	0.0134644	0.0134137	0.0130239	0.013772	0.0132896	0.0138349	0.0139977	0.0164698	0.0145077	0.0139547	0.0169457	0.0133811	0.0139912
0.0137414	0.0138564	0.0136428	0.0139969	0.0136206	0.0132765	0.0139024	0.0141927	0.0138423	0.0132103	0.0134675	0.0131102	0.0134632	0.0131891	0.0133012	0.0145138	0.0137399	0.0135484	0.0134356	0.0137343	0.013632	0.0141778	0.0121292	0.0150033	0.0136542	0.0134872	0.0133852	0.0131241	0.013012	0.0143221	0.014258	0.0147264	0.0143292	0.0136691	0.0139656	0.013338	0.0134595	0.0146141	0.0141096	0.012493	0.0133604	0.0140261	0.0137025	0.0135816	0.0130152	0.013374	0.013699	0.0158666	0.0132335	0.0134164
0.0136859	0.0140686	0.0133524	0.0139916	0.0144231	0.0142601	0.0141013	0.0150862	0.0145971	0.0141259	0.0139645	0.0139869	0.014073	0.0137397	0.013743	0.0152433	0.0140738	0.0148283	0.0142115	0.0143458	0.0148538	0.0142175	0.013016	0.0141491	0.0141388	0.0140254	0.0143043	0.0143099	0.0135695	0.0145486	0.0137064	0.0150465	0.0147446	0.0147316	0.0149965	0.0136974	0.0140212	0.014058	0.0142253	0.0127828	0.0139614	0.0136902	0.0140444	0.0141127	0.0137456	0.0148714	0.014639	0.0168127	0.0139586	0.0138533
0.0137826	0.0135883	0.0134085	0.0136191	0.0135317	0.0136711	0.0136077	0.0152581	0.0143712	0.0138845	0.0139853	0.0135607	0.0137215	0.0130936	0.0133486	0.0147258	0.0137002	0.0139462	0.013806	0.0134618	0.0140774	0.0140429	0.0141677	0.0133403	0.0140959	0.0139497	0.0147719	0.0135887	0.0123243	0.0141224	0.0136006	0.0147572	0.0145525	0.0142383	0.0139994	0.0126756	0.0131133	0.0129751	0.0137536	0.0125008	0.0145318	0.0132323	0.0141186	0.0144217	0.0124491	0.013396	0.0141395	0.0161607	0.0136905	0.0139928
0.0128734	0.0146782	0.0127739	0.0134826	0.0134573	0.0130457	0.0140844	0.0147874	0.0143175	0.0134544	0.0133335	0.0131102	0.0132323	0.0128342	0.0137969	0.0145281	0.0138447	0.0133808	0.0129031	0.0133162	0.01391	0.0125607	0.0122048	0.0130588	0.0134489	0.0137355	0.0137336	0.0131442	0.0120533	0.0136617	0.0130673	0.0139684	0.0138562	0.0142454	0.0140686	0.012812	0.0134847	0.0131736	0.0134148	0.0126657	0.0136689	0.0129171	0.0132298	0.0135964	0.0122532	0.01339	0.0139789	0.0163184	0.0132841	0.0140644
0.0134194	0.0137042	0.0134663	0.013557	0.0143812	0.0145663	0.0140169	0.0144378	0.0143047	0.0136738	0.0137139	0.0136032	0.0138013	0.0146872	0.0135634	0.0146762	0.0141199	0.0138462	0.014066	0.0140579	0.014078	0.0140401	0.012568	0.0137404	0.0144298	0.0137915	0.0140652	0.0143317	0.013349	0.0141537	0.0137165	0.014699	0.0142849	0.0139653	0.0148519	0.0136688	0.013486	0.0135554	0.0139886	0.0125928	0.013656	0.0135683	0.0139707	0.013792	0.0135763	0.0145176	0.0139285	0.0159083	0.0133975	0.0133857
0.0138015	0.0136667	0.0137363	0.0135876	0.0150134	0.0143819	0.0140423	0.0144754	0.014293	0.0135242	0.0137464	0.0139989	0.0139459	0.0143941	0.0137897	0.0150513	0.0140038	0.0139091	0.0142644	0.0145005	0.0141203	0.0142795	0.0128967	0.0140129	0.0144107	0.0140013	0.0141644	0.0144297	0.0133867	0.0141016	0.0137891	0.0144562	0.0144025	0.0138818	0.0149033	0.0138912	0.0137286	0.0136633	0.0138885	0.0126155	0.0134908	0.0137418	0.0139938	0.0137297	0.0153467	0.0145169	0.0138836	0.0159417	0.013333	0.0135439
0.0140897	0.0141996	0.0131333	0.0138261	0.0134641	0.0138847	0.0135264	0.015782	0.0152662	0.0143933	0.014575	0.014226	0.0147013	0.0129248	0.0136737	0.014339	0.0134174	0.0137618	0.0136707	0.0134156	0.0144703	0.0129047	0.0156507	0.0138074	0.0135695	0.0137229	0.0135567	0.013683	0.0125134	0.0139309	0.0133817	0.0143688	0.0140755	0.0151065	0.0139541	0.0126531	0.0136247	0.0137497	0.01376	0.0131293	0.0144084	0.013365	0.0136812	0.0150317	0.0140045	0.0135115	0.0149623	0.0174477	0.0141769	0.0145682
0.0145955	0.0137105	0.0135123	0.0134805	0.0134934	0.0139087	0.0138376	0.0153992	0.0149346	0.0140677	0.0144456	0.0135759	0.0139249	0.0127437	0.013516	0.0140162	0.013108	0.013096	0.0133235	0.0129983	0.0142576	0.0130627	0.0169569	0.0135453	0.0136211	0.0136002	0.0134435	0.0131744	0.0127797	0.0136191	0.0132566	0.0137932	0.0136889	0.0143562	0.013796	0.0126609	0.0145439	0.0133096	0.0133103	0.0131933	0.0146394	0.0130652	0.0137559	0.0150133	0.0125205	0.0134327	0.0148455	0.0163073	0.013933	0.0155747
0.0144286	0.0137859	0.013711	0.0127154	0.0124261	0.0134712	0.012133	0.0148721	0.0144804	0.014449	0.0142402	0.0143486	0.0147471	0.0116992	0.012402	0.0130486	0.012131	0.0131354	0.0130373	0.0120316	0.0132703	0.0118574	0.0226855	0.0126744	0.0129942	0.012536	0.0150176	0.0122447	0.0115372	0.0125266	0.0123522	0.0130578	0.012936	0.0136915	0.0126811	0.01155	0.0122573	0.0133342	0.0123901	0.0117002	0.0133023	0.0120014	0.0124395	0.0137203	0.0120694	0.012358	0.0133622	0.0147677	0.0138244	0.0136143
0.0141021	0.0135894	0.012941	0.0135568	0.0132765	0.0134661	0.0131704	0.0152436	0.0147967	0.0146545	0.0142848	0.0139276	0.0144001	0.0127738	0.0137671	0.0141889	0.0134284	0.0135406	0.0134105	0.013309	0.014148	0.0130164	0.0162035	0.0137803	0.0134094	0.0136486	0.0135548	0.0135294	0.0124325	0.013862	0.0131668	0.0141817	0.0142363	0.0147881	0.0140547	0.0128523	0.0136346	0.0134909	0.0136285	0.0132753	0.014325	0.0130401	0.0137953	0.0152216	0.0123857	0.0133449	0.0147706	0.0170696	0.014517	0.0143351
0.012577	0.0139008	0.0153091	0.0145999	0.0137863	0.0131066	0.0138328	0.0138258	0.013409	0.0132015	0.0130576	0.0127044	0.0135711	0.0129181	0.012886	0.0141119	0.0135174	0.0131865	0.0133309	0.0139639	0.0132353	0.0143164	0.0130784	0.0130377	0.0138408	0.0133917	0.0134167	0.0130839	0.011949	0.0144495	0.0154836	0.0151728	0.0146938	0.0133812	0.0136789	0.0128324	0.0133975	0.0128936	0.0149499	0.0123963	0.0131507	0.0154137	0.0140521	0.0131514	0.0123931	0.013261	0.0134164	0.0149574	0.0134557	0.01327
0.0140239	0.0145081	0.0139618	0.0152434	0.0140831	0.0140765	0.0137933	0.0161945	0.0154923	0.0153219	0.0145835	0.0143827	0.0145645	0.0133601	0.0145106	0.0152237	0.0143858	0.0146218	0.0145716	0.0137733	0.0147875	0.0136741	0.0140697	0.0144818	0.0139257	0.0145441	0.0141837	0.0140531	0.0131111	0.0149903	0.014331	0.0159286	0.0151717	0.0156939	0.0148405	0.0132111	0.0138306	0.0144245	0.015184	0.0136582	0.0145904	0.0141699	0.0141774	0.0151313	0.0130729	0.0139949	0.015511	0.0190036	0.0161315	0.0145754
0.0133888	0.0137314	0.0130938	0.0147406	0.0133393	0.0133173	0.0134122	0.0148232	0.0142318	0.0144113	0.0137359	0.0133802	0.0134809	0.0126682	0.0131717	0.0139689	0.0138942	0.013409	0.0135272	0.0129806	0.0138401	0.0132326	0.0157088	0.0134982	0.0133377	0.0133615	0.0133243	0.0131167	0.0120956	0.0143257	0.013879	0.0155265	0.0148131	0.0145501	0.0139939	0.0124925	0.0131079	0.0131843	0.0147212	0.0129942	0.0138434	0.0140828	0.0134215	0.0140985	0.0120429	0.0131725	0.0144587	0.0165073	0.0163825	0.0138657
0.0123517	0.0128348	0.0126031	0.0136351	0.0126315	0.0128928	0.0122936	0.0139364	0.0133056	0.0134511	0.0127798	0.012572	0.0127523	0.0119567	0.0125165	0.0131711	0.0127873	0.0129081	0.013183	0.0123323	0.0131072	0.0124022	0.0128304	0.0138714	0.0125017	0.0128349	0.012541	0.0124721	0.0116453	0.0133162	0.0128349	0.0140189	0.0135969	0.0138412	0.0131522	0.0118668	0.0129427	0.0124986	0.0135732	0.0132185	0.0128634	0.0130162	0.0127246	0.0133932	0.0116352	0.0126926	0.0139249	0.0157716	0.0154561	0.0127944
0.0136422	0.0142824	0.0132994	0.0147645	0.0140306	0.0136509	0.0138354	0.0157497	0.0150104	0.0147875	0.0143413	0.0136963	0.0141247	0.0131786	0.0138147	0.0146409	0.0143241	0.0139857	0.0140633	0.013668	0.0143722	0.0137829	0.0136953	0.0140034	0.0139623	0.013989	0.0138009	0.0135931	0.0127586	0.014776	0.0140652	0.015902	0.0150382	0.015168	0.0145609	0.0130278	0.0136456	0.0140088	0.0149343	0.0137179	0.0143236	0.0142987	0.0140466	0.0149406	0.0130071	0.0138444	0.015102	0.0178072	0.0159449	0.0144513
0.00920504	0.00950004	0.00930177	0.00976792	0.00919157	0.00921891	0.00921573	0.0107698	0.00983856	0.00985549	0.00958592	0.00938991	0.00954699	0.0090362	0.00934472	0.0108756	0.00964618	0.00948537	0.0094519	0.00911818	0.00961844	0.00916314	0.00955342	0.00949575	0.00927113	0.00944534	0.00927217	0.00929057	0.00873685	0.00954391	0.00940984	0.0096618	0.00959011	0.0100804	0.00949914	0.00887433	0.009426	0.0092842	0.00963282	0.00914123	0.00960792	0.00926935	0.00952942	0.00983924	0.00907326	0.00939973	0.00997569	0.0111811	0.0128282	0.00952055
0.0134562	0.0137144	0.0140541	0.0142828	0.013352	0.0133934	0.0135294	0.0150675	0.0144986	0.0141532	0.0137233	0.0135039	0.0137764	0.0128329	0.01351	0.0145162	0.0135838	0.0141659	0.0138562	0.0132302	0.014177	0.0133268	0.0141515	0.0139562	0.0133704	0.0136031	0.0135152	0.0133037	0.0126309	0.0142307	0.0139502	0.0148752	0.0143464	0.0147913	0.014113	0.0127659	0.0134486	0.0141393	0.0144379	0.0132033	0.0139629	0.0137777	0.0137756	0.0144518	0.0124297	0.013423	0.0147232	0.016824	0.0151146	0.0139899
0.0130738	0.0144335	0.0126836	0.013903	0.0129686	0.012757	0.0125986	0.0148763	0.0145578	0.0137025	0.013395	0.0132371	0.0138093	0.0122167	0.0130486	0.0139447	0.0146933	0.013138	0.0130794	0.0125682	0.0134178	0.0124698	0.0130483	0.0130764	0.0134114	0.0138388	0.0129044	0.0128401	0.0120739	0.0137478	0.0129189	0.0139336	0.0141438	0.0146047	0.0136214	0.0121435	0.0125718	0.0128695	0.013824	0.0128049	0.013293	0.0133762	0.012953	0.0151007	0.0118131	0.0130939	0.0150084	0.0163782	0.0150213	0.0134135
0.0138709	0.0132146	0.0133016	0.0140345	0.0132389	0.0134551	0.0129201	0.0149071	0.0143768	0.0141964	0.0137566	0.0133104	0.0138296	0.0125197	0.0138518	0.0140072	0.0132654	0.0132424	0.0135544	0.012962	0.0137317	0.0129447	0.0146918	0.0133092	0.0133178	0.0135961	0.0136804	0.0130901	0.012111	0.0138641	0.0132649	0.0142506	0.0139705	0.014332	0.0139746	0.0123133	0.0129272	0.0133588	0.0140457	0.0129394	0.0138766	0.0133923	0.0136208	0.0146072	0.0121857	0.0130735	0.0145024	0.0169458	0.0147736	0.0145093
0.0140314	0.0136054	0.013299	0.0140863	0.0135234	0.0136425	0.0135821	0.0153778	0.0150138	0.0146541	0.0141993	0.0139554	0.0141764	0.01302	0.0141765	0.0146234	0.0137539	0.0139369	0.0139117	0.0134968	0.0143278	0.0133727	0.0140409	0.0139791	0.0135273	0.0138393	0.0140968	0.0135651	0.0126662	0.0143576	0.0135935	0.0150107	0.0144153	0.0148296	0.0142014	0.012755	0.0137617	0.0141618	0.0142852	0.0128986	0.0143197	0.0136379	0.0138882	0.0146315	0.0125523	0.0136561	0.0147244	0.0175286	0.0148372	0.0143162
0.013533	0.0143088	0.0132868	0.0148622	0.0135855	0.0134704	0.013602	0.0150535	0.0145616	0.0148306	0.013972	0.013505	0.0138179	0.0129109	0.0136485	0.0142586	0.0139065	0.0140845	0.0139486	0.013522	0.0141226	0.013433	0.013517	0.0137293	0.0137128	0.0139134	0.013919	0.0136379	0.0122577	0.0144687	0.0142697	0.015346	0.0146633	0.0147304	0.0141726	0.0127003	0.0133898	0.0135529	0.0147875	0.0127855	0.014	0.0139213	0.0137634	0.0142908	0.0125394	0.013556	0.0147263	0.0167267	0.015074	0.0142077
0.0147041	0.0138756	0.0135798	0.0143437	0.0134476	0.0138723	0.0148189	0.015262	0.0149984	0.0142864	0.0140477	0.0141253	0.0141452	0.0127022	0.013463	0.0146661	0.0131558	0.0141895	0.0131268	0.0127788	0.0140627	0.0127689	0.0186302	0.0139954	0.0132156	0.0133485	0.0135182	0.0129752	0.0125022	0.0139652	0.0133805	0.0142866	0.0145871	0.0147977	0.0139786	0.0123153	0.0145793	0.0141896	0.0139477	0.0138899	0.0151885	0.0133133	0.0131441	0.0151747	0.0127194	0.0135307	0.0148302	0.0168505	0.0145761	0.0159709
0.014444	0.0156265	0.0138562	0.0148441	0.014364	0.014375	0.015078	0.0145255	0.0141907	0.0140827	0.0134952	0.013543	0.0136281	0.013437	0.0128232	0.0139869	0.0138068	0.0133284	0.0141044	0.0144689	0.0140211	0.0136831	0.0172855	0.0133337	0.0138911	0.0136478	0.013887	0.0133839	0.0124413	0.0144823	0.0145374	0.0146596	0.0146121	0.0141605	0.0139929	0.0135133	0.0145579	0.0130497	0.0143507	0.0125205	0.0144222	0.0143213	0.014785	0.0143175	0.012339	0.0139009	0.0140448	0.015439	0.0141397	0.0144104
0.0133305	0.0137866	0.0130325	0.0134703	0.0148854	0.0136026	0.0132267	0.0138725	0.0136704	0.013392	0.0137048	0.0137435	0.013667	0.0143496	0.0134062	0.0161089	0.0143479	0.0140497	0.0140337	0.0144744	0.0138387	0.0141332	0.0117988	0.0138682	0.0143795	0.0137256	0.0134339	0.014499	0.01341	0.0136482	0.0131242	0.0141625	0.0140892	0.0136272	0.0154528	0.0139639	0.0135538	0.0132793	0.0134645	0.0125292	0.0129827	0.0133102	0.0131178	0.0135413	0.0209287	0.0147211	0.0133128	0.0164425	0.013192	0.0129947
0.0145444	0.0135299	0.0128015	0.0137542	0.0134329	0.013498	0.0132815	0.0153331	0.0147073	0.0151239	0.0150031	0.0141364	0.0145728	0.0129687	0.014123	0.0145063	0.0137055	0.0147677	0.0135251	0.0132841	0.0143486	0.0128345	0.0152392	0.0139465	0.01334	0.0135627	0.0137864	0.0136102	0.0126586	0.0140428	0.013251	0.0149801	0.013989	0.0150443	0.0143434	0.0126835	0.0133406	0.0140238	0.0140183	0.0133784	0.0143145	0.0130683	0.013457	0.0149793	0.0126091	0.0134423	0.0148472	0.0175643	0.0149165	0.0141273
0.0136468	0.0140866	0.0141819	0.0141152	0.0140968	0.014097	0.0139498	0.0151967	0.0147179	0.0142226	0.0140609	0.0139143	0.0140391	0.0134547	0.0137264	0.014683	0.0138203	0.0140683	0.014006	0.0138758	0.014429	0.01392	0.0138183	0.0138714	0.0141911	0.0144244	0.0141739	0.014047	0.0129309	0.0143681	0.0140566	0.0148327	0.0145003	0.0145368	0.0145618	0.0133147	0.0136327	0.013791	0.0142915	0.0128343	0.0141924	0.0141076	0.0143582	0.014371	0.0133396	0.0139078	0.014448	0.0166222	0.0141159	0.0139743
0.013015	0.0149642	0.0140489	0.0142782	0.0138694	0.0138197	0.0141304	0.0140455	0.013693	0.0134653	0.0131825	0.0132533	0.0132602	0.0134876	0.0135115	0.0137705	0.0135782	0.0130441	0.0136225	0.0138233	0.0137547	0.0140574	0.0122415	0.0130486	0.0140338	0.0137884	0.0147922	0.0143724	0.0124393	0.0143695	0.0146326	0.0150869	0.0143004	0.0137564	0.0138725	0.0134357	0.0136221	0.012707	0.0143624	0.0124654	0.0136486	0.0143572	0.0140397	0.0132932	0.0155528	0.0136512	0.0137285	0.0151725	0.0136587	0.0137854
0.0134975	0.0141361	0.0136628	0.0142039	0.014187	0.0140205	0.0139497	0.0147412	0.0143189	0.0140462	0.013903	0.0140345	0.0138626	0.013393	0.0138466	0.0146305	0.0137654	0.0138866	0.0140313	0.0139776	0.0141495	0.0139615	0.0133109	0.0137113	0.0140069	0.0141454	0.0139737	0.0140026	0.0129424	0.0143927	0.0139974	0.0149371	0.0145583	0.0141616	0.0145413	0.0132356	0.0136685	0.0136766	0.0143061	0.0129775	0.0139846	0.0137909	0.0142812	0.014042	0.0135106	0.0138748	0.014099	0.0161128	0.0138181	0.013706
0.0131473	0.0143067	0.0136934	0.0137437	0.0140288	0.0140778	0.0147745	0.0144498	0.014306	0.0135504	0.0133466	0.0137382	0.0134584	0.0135008	0.0131948	0.0140978	0.0138704	0.0137704	0.0136484	0.0141938	0.0139172	0.0134078	0.0123875	0.0136772	0.0140088	0.014096	0.0139587	0.0138096	0.0127784	0.0140286	0.0137634	0.014625	0.0141883	0.0140111	0.0141885	0.0133491	0.013995	0.0131786	0.0137484	0.0126214	0.014021	0.0137123	0.014156	0.0140204	0.0124503	0.013718	0.0137948	0.0153424	0.0136605	0.0140023
0.0131031	0.0151316	0.0145992	0.0139185	0.0137163	0.0138949	0.0145896	0.0143099	0.0140004	0.0138543	0.0135282	0.0132496	0.0134597	0.0133074	0.012966	0.0140472	0.0139336	0.0133335	0.0138516	0.0141897	0.0140102	0.0146413	0.012399	0.0133939	0.0138096	0.0140179	0.0138037	0.0133669	0.0122547	0.014029	0.0137565	0.0143082	0.0144246	0.0139086	0.0141949	0.0132595	0.0137478	0.0136748	0.013875	0.0126281	0.0136732	0.0136863	0.0143503	0.0140904	0.0124557	0.0136067	0.0138936	0.0157196	0.0137472	0.0135293
0.0145656	0.0145921	0.0144341	0.014403	0.0142708	0.0143467	0.0140013	0.0165177	0.0161062	0.0149731	0.0153975	0.0152067	0.0151715	0.0134742	0.0147324	0.0156513	0.0145081	0.0149547	0.0145236	0.0141277	0.0153885	0.014034	0.0139876	0.0144558	0.0143396	0.014979	0.0145112	0.0146728	0.0133054	0.0148038	0.0142433	0.0154018	0.0151116	0.0157106	0.0151583	0.0135141	0.0141656	0.0146731	0.0147072	0.0138243	0.0151479	0.0142575	0.0144694	0.0154459	0.0133666	0.0143973	0.0154622	0.0188115	0.0150728	0.0148139
0.0129539	0.0125026	0.0123325	0.0128315	0.0132987	0.0129985	0.01272	0.0137866	0.0137542	0.0133366	0.0131446	0.0140488	0.0135685	0.0129078	0.0133623	0.0154124	0.0128617	0.0133132	0.0132957	0.0130114	0.0136613	0.0124637	0.0115849	0.0137531	0.0130339	0.0134919	0.0135694	0.0138399	0.0201069	0.0129601	0.0125729	0.0132948	0.0132802	0.0134619	0.0137542	0.0190008	0.0126152	0.0141608	0.0127724	0.0120081	0.0128294	0.0123736	0.0124601	0.0128891	0.0128519	0.013281	0.0131103	0.0159303	0.0126696	0.0126548
0.0136466	0.0140917	0.0135	0.0139685	0.0139436	0.0140345	0.0144631	0.0148421	0.0143666	0.0141595	0.0136369	0.0133833	0.0136417	0.0134465	0.0131133	0.0142076	0.0137572	0.0136579	0.0139492	0.0138429	0.0140262	0.0138018	0.0137035	0.0136376	0.0141776	0.0136249	0.0137584	0.0137808	0.0128119	0.0144834	0.0140404	0.0149289	0.0149794	0.0140844	0.0144967	0.0131851	0.0137867	0.0133275	0.0142867	0.0125115	0.0139885	0.0139087	0.0141281	0.0138134	0.0126042	0.0137834	0.0140459	0.0158788	0.013581	0.013778
0.0131642	0.0144358	0.0138428	0.0142282	0.0135929	0.0134837	0.014055	0.0143049	0.0135699	0.0138882	0.0130979	0.0129708	0.013186	0.0130879	0.0127462	0.0140813	0.0137894	0.0136729	0.0133962	0.0137192	0.0135914	0.0146582	0.0141639	0.0130419	0.0136234	0.013443	0.0136319	0.0134284	0.0125254	0.0141565	0.014486	0.0146581	0.0147607	0.0136116	0.0138661	0.0128618	0.013378	0.0128659	0.0145248	0.0125701	0.0133439	0.0140229	0.0142041	0.0132183	0.0121397	0.01358	0.0135337	0.0156225	0.0133514	0.0134925
0.0144552	0.0140374	0.0134865	0.0141862	0.0139941	0.0141147	0.014139	0.0176226	0.0160261	0.0152408	0.0150741	0.0148609	0.0149724	0.0134103	0.0143756	0.0153002	0.0140601	0.0145188	0.0139937	0.013847	0.0152919	0.0135676	0.0141279	0.0145915	0.0142517	0.0144095	0.0141807	0.0140323	0.0130043	0.0145805	0.0137835	0.0152625	0.0148518	0.0157803	0.0148516	0.0132356	0.0140782	0.0144339	0.0144008	0.0136634	0.0150965	0.0136216	0.0143607	0.0154708	0.0135003	0.0142004	0.0156922	0.0187962	0.0150485	0.0151664
0.0132858	0.0141014	0.0146902	0.0157946	0.0143507	0.0135882	0.0139116	0.0148076	0.0141338	0.0144735	0.0137452	0.0135564	0.0136172	0.0133126	0.013643	0.0148773	0.0146195	0.0144996	0.0142024	0.0140692	0.0140747	0.0161597	0.0132412	0.0139237	0.0141859	0.0139112	0.0143627	0.0136999	0.0124481	0.0154416	0.0156226	0.0172063	0.0155102	0.0144595	0.014579	0.0133436	0.0134746	0.0139237	0.0170571	0.0134025	0.0139211	0.017181	0.0141884	0.0138689	0.0129951	0.0139242	0.0142679	0.0165526	0.0144946	0.0136957
0.0130052	0.0141394	0.0137688	0.0145304	0.0143711	0.0139071	0.0141032	0.0142436	0.013907	0.013864	0.0133632	0.0134688	0.0132861	0.0135265	0.0128779	0.0141989	0.0139629	0.0135158	0.0140199	0.0142269	0.0138637	0.0149434	0.0122932	0.013448	0.0140683	0.0138165	0.0141984	0.0138601	0.0126101	0.0146711	0.0147201	0.0153862	0.0149791	0.0137624	0.0143296	0.0133683	0.0136772	0.0129829	0.0151676	0.0124805	0.0134817	0.0149917	0.0142375	0.0135587	0.0124059	0.0138229	0.0138149	0.015675	0.0136565	0.0133495
0.0131468	0.014248	0.0141863	0.0150794	0.0141088	0.0134848	0.0138871	0.0146061	0.014021	0.0143229	0.0134204	0.013207	0.0133135	0.0132705	0.0138135	0.0142929	0.0141413	0.0140583	0.0139118	0.0140128	0.0139213	0.0154624	0.0130485	0.0135636	0.0139991	0.013774	0.0140949	0.013533	0.0122528	0.0149992	0.0148261	0.0159076	0.0148727	0.0141642	0.0142114	0.0131615	0.0136435	0.0134069	0.0161247	0.0130093	0.0136474	0.015438	0.0141803	0.0137203	0.0123378	0.0136843	0.0141076	0.0164849	0.0146063	0.0137209
0.0139923	0.0143211	0.0137108	0.0149829	0.013831	0.0138028	0.0137156	0.0158658	0.0151966	0.0152203	0.0142942	0.0140346	0.0142144	0.0131242	0.0144107	0.0148166	0.0142362	0.0142696	0.0142007	0.0136462	0.0145269	0.0134685	0.0140807	0.0141062	0.0140214	0.0144523	0.014021	0.0139477	0.0128109	0.0148063	0.0142176	0.0156032	0.0148359	0.0153007	0.0145422	0.0128894	0.0137082	0.0140483	0.0150184	0.0135682	0.0144139	0.0141357	0.0141988	0.0149847	0.013057	0.0138228	0.0151477	0.0182681	0.016289	0.0145785
0.0137228	0.0140214	0.0133602	0.014495	0.0135087	0.013658	0.013579	0.0153229	0.0147586	0.0147776	0.0140725	0.0137821	0.0138949	0.0129914	0.0140462	0.0143558	0.0138804	0.0136664	0.0137699	0.0134589	0.0142102	0.0132301	0.0140359	0.0137637	0.0137448	0.013908	0.0137375	0.0135226	0.0125693	0.0144134	0.0138782	0.0150808	0.0143809	0.0148953	0.014204	0.012672	0.0136497	0.0134931	0.014465	0.0130397	0.0142663	0.0136459	0.0138106	0.0146601	0.0131212	0.0135835	0.0147579	0.0171263	0.0161184	0.0142113
0.0123257	0.0131973	0.0129051	0.0150092	0.0130537	0.0135739	0.0142806	0.0144094	0.0131951	0.0133142	0.0127817	0.0124902	0.0127327	0.0131656	0.012711	0.0132504	0.0133619	0.0132869	0.0136211	0.0129036	0.0141238	0.0133824	0.0124751	0.0127183	0.0135904	0.0130169	0.0131961	0.0127422	0.0118079	0.0143991	0.0145574	0.0156722	0.0154925	0.0134535	0.0135908	0.0121533	0.0125577	0.0129341	0.016049	0.0120887	0.0136892	0.0145781	0.0129821	0.0131784	0.0121991	0.0138214	0.0137133	0.0148627	0.0147322	0.0141548
0.013491	0.0140194	0.0133331	0.0145677	0.0136375	0.013416	0.013709	0.015204	0.0146194	0.0149571	0.0141756	0.0135837	0.0138432	0.0129912	0.013737	0.0143392	0.0137214	0.0136537	0.0136352	0.0134691	0.0141728	0.0134508	0.01414	0.0137009	0.0138074	0.0137369	0.0136129	0.0133288	0.0122777	0.0143631	0.0139428	0.0149982	0.0144847	0.0146997	0.0141759	0.012584	0.0136439	0.0134479	0.0145225	0.0130492	0.0140918	0.0140505	0.0137927	0.0147099	0.0124232	0.0136498	0.0147256	0.0171334	0.0158642	0.0143191
0.0155061	0.0132793	0.0127609	0.013609	0.0136098	0.0137532	0.0130094	0.0163989	0.0152707	0.0161348	0.0140731	0.0146385	0.0149419	0.0125033	0.0132936	0.0139375	0.0139749	0.0137229	0.0132666	0.0129419	0.0142157	0.0127551	0.0243127	0.0134005	0.0132143	0.0135377	0.0133128	0.0139745	0.0135419	0.0140917	0.0130871	0.0149083	0.0139256	0.0157622	0.0141048	0.0123555	0.0139549	0.0132947	0.0137473	0.0127012	0.0144477	0.0132322	0.0133847	0.0151078	0.012597	0.0133095	0.0159989	0.0167629	0.0148459	0.0155933
0.0191268	0.0128096	0.0123694	0.0129952	0.0125485	0.0144811	0.012655	0.0150106	0.0149387	0.0137652	0.0136026	0.0133733	0.0135167	0.0120524	0.0128502	0.0141482	0.0129173	0.0127113	0.012712	0.0124165	0.0141216	0.0122089	0.0462926	0.0134494	0.0126971	0.0130299	0.0128179	0.012731	0.0118435	0.0130853	0.0126477	0.0140748	0.0140111	0.01579	0.0133226	0.0119534	0.0126896	0.0124292	0.01298	0.0122477	0.014951	0.0123857	0.0128379	0.0161196	0.0119573	0.012597	0.0152418	0.0155556	0.0162193	0.0137002
0.0136662	0.01392	0.0143446	0.0144939	0.0139137	0.0136951	0.0139262	0.0149558	0.0145489	0.0143361	0.0141635	0.0139468	0.0138333	0.013294	0.0137527	0.0145655	0.0138053	0.0136699	0.0137691	0.0137851	0.0141839	0.0136643	0.0136037	0.0138676	0.0139808	0.0137883	0.013954	0.0135292	0.0125311	0.0143541	0.0141495	0.0149617	0.0144154	0.0145036	0.0143114	0.0130118	0.0138209	0.0136411	0.0145583	0.0131295	0.0140495	0.0143715	0.0138933	0.014347	0.0149111	0.0138544	0.0145977	0.0165208	0.0149406	0.0141857
0.0138828	0.0144423	0.0132098	0.0146866	0.0134268	0.0139395	0.0137895	0.0151103	0.0144669	0.0143402	0.0140372	0.0136261	0.0138239	0.0128582	0.0132408	0.0141327	0.0137129	0.0139543	0.0134507	0.0133274	0.0140235	0.0133855	0.0151959	0.0138982	0.0134781	0.0135132	0.0138771	0.0134747	0.0123828	0.0142143	0.013806	0.0151393	0.0144541	0.0147001	0.0140522	0.012911	0.0134316	0.0134348	0.014441	0.012641	0.0142348	0.0133818	0.0136599	0.0144999	0.0124524	0.0134577	0.0146001	0.0165718	0.0156272	0.0142135
0.0136544	0.0141736	0.0135309	0.0145574	0.0136343	0.0135835	0.0138477	0.015209	0.0146371	0.0145486	0.0140095	0.013665	0.0138821	0.0130614	0.0136017	0.0143689	0.0139201	0.0138679	0.0137486	0.0135775	0.0141365	0.01327	0.0144769	0.013791	0.0138641	0.0137256	0.0137583	0.013359	0.0124012	0.0143654	0.0140084	0.0151996	0.0145181	0.0147878	0.0141924	0.0128128	0.0137362	0.0136468	0.0145494	0.0129289	0.0141249	0.0139782	0.0136565	0.0144673	0.0124901	0.0135829	0.0147787	0.0171183	0.0156677	0.0142537
0.0129734	0.0138287	0.013864	0.0151239	0.0135637	0.013269	0.0136475	0.0144425	0.0138628	0.0141325	0.013327	0.013061	0.0132953	0.0128866	0.0131596	0.0137861	0.0138877	0.0132284	0.0136538	0.013624	0.0138179	0.0137984	0.0139548	0.0131448	0.0135353	0.0133804	0.0134721	0.0130843	0.0119408	0.0144855	0.0143475	0.0154515	0.0146316	0.0142878	0.0137919	0.012744	0.0133572	0.0128806	0.0148847	0.0130826	0.0135853	0.014344	0.0139076	0.0141407	0.0120876	0.0132391	0.0141757	0.0159272	0.0155136	0.0136668
0.0115354	0.0129291	0.0129786	0.0206711	0.0125531	0.0120168	0.0123652	0.0127818	0.012417	0.0131208	0.0119105	0.011519	0.0119117	0.0118897	0.0122007	0.012152	0.0127738	0.0120238	0.0127375	0.0123722	0.0123227	0.0129931	0.0124469	0.0121354	0.0125914	0.0125347	0.0126431	0.0119781	0.0108667	0.0137683	0.0138819	0.0159056	0.0155277	0.0128087	0.0125107	0.011552	0.0118847	0.0116569	0.0162424	0.0120154	0.0125062	0.013676	0.012571	0.0127802	0.010894	0.0119524	0.0127698	0.0155856	0.0197591	0.0124875
0.0127309	0.013734	0.0126844	0.0139315	0.0131618	0.0130273	0.0131918	0.0145293	0.0139629	0.0139449	0.0133823	0.0131893	0.013245	0.0121804	0.0128981	0.0135282	0.0129775	0.0132027	0.013531	0.0125699	0.0134686	0.0126887	0.0127843	0.0130133	0.0131255	0.0132449	0.0128095	0.0127885	0.0118478	0.0137856	0.0133509	0.0143875	0.0144186	0.014394	0.0132909	0.0121583	0.0130534	0.0129786	0.014412	0.0126531	0.013227	0.0132921	0.0130938	0.014019	0.0119228	0.0127748	0.0142501	0.0159133	0.0150985	0.013375
0.0142898	0.0139732	0.0129399	0.0137166	0.0134005	0.0136523	0.0137373	0.016348	0.0154988	0.0147954	0.0148619	0.0142455	0.0147705	0.0128728	0.0144891	0.0149949	0.0141566	0.0149234	0.013763	0.0132285	0.0147649	0.0130143	0.014824	0.0141095	0.0135606	0.0141064	0.0137914	0.0135274	0.0126045	0.0140909	0.0133024	0.0145974	0.0143223	0.0157345	0.0143697	0.012805	0.0137934	0.0145586	0.01403	0.0133906	0.0144001	0.0131948	0.013924	0.0151368	0.0127887	0.0138031	0.0159622	0.0184209	0.0147356	0.0147911
0.0145609	0.014344	0.0136244	0.01499	0.0144434	0.0142007	0.01415	0.017277	0.0162671	0.0162255	0.0155058	0.0146517	0.0153467	0.0143078	0.0158447	0.015987	0.0145994	0.0154054	0.0148661	0.0140696	0.0156071	0.0142236	0.0141197	0.0152375	0.01444	0.0151534	0.0145329	0.0143444	0.0134123	0.0155441	0.014548	0.0163182	0.0158229	0.0164902	0.0154531	0.0141495	0.0141848	0.0152712	0.0155747	0.0145022	0.0154537	0.0142127	0.0144696	0.0159529	0.0133088	0.0144249	0.0163602	0.0203116	0.0155143	0.0166292
0.0143083	0.0140397	0.0133525	0.0137687	0.0134548	0.0137923	0.0136153	0.0157279	0.0151625	0.0146037	0.0144708	0.014201	0.0144287	0.0130316	0.0138699	0.0145059	0.0136757	0.0137965	0.0136806	0.013358	0.014394	0.0133032	0.0148493	0.0138446	0.0137333	0.013987	0.013722	0.0135662	0.0126281	0.0139999	0.013433	0.0145256	0.0141419	0.0153207	0.0142154	0.0128541	0.0137124	0.0137502	0.0138995	0.0131309	0.0143525	0.0132168	0.0139643	0.0150652	0.0126603	0.0136853	0.0154245	0.0169591	0.0144124	0.0145544
0.0142136	0.0137974	0.0134876	0.0138394	0.0136586	0.0138457	0.0138347	0.0160668	0.0155579	0.0149509	0.0149084	0.0145105	0.0147069	0.0131053	0.0144182	0.0148542	0.0137727	0.0140431	0.0137889	0.0135659	0.0147314	0.0132682	0.015544	0.0142241	0.0139052	0.0140309	0.0140446	0.0137638	0.0128206	0.0142342	0.0136105	0.0148409	0.0145302	0.0151713	0.0144183	0.0130533	0.0138142	0.0140015	0.0141121	0.0132344	0.0145063	0.0132615	0.0139833	0.0152005	0.0126994	0.0138561	0.0151074	0.0178625	0.0145656	0.0149361
0.0140772	0.0137054	0.0132499	0.0133178	0.0139971	0.0140605	0.0134952	0.0147417	0.0145292	0.0139217	0.014456	0.0146995	0.0141325	0.0137828	0.0137939	0.0154588	0.0142204	0.0141654	0.0138726	0.0138914	0.0142653	0.0133383	0.0126859	0.0145133	0.0139306	0.0138539	0.0142145	0.0143693	0.0132511	0.0139343	0.0133253	0.014396	0.0142295	0.014092	0.0149536	0.0136661	0.0138902	0.0144967	0.0138087	0.012809	0.0135599	0.013138	0.0136205	0.0140752	0.0144596	0.0138878	0.0140022	0.0161568	0.0136244	0.0135595
0.0141971	0.0140958	0.013519	0.0137145	0.0139166	0.0139979	0.0142982	0.0156053	0.0149684	0.0142729	0.0143375	0.0139085	0.0140891	0.0131925	0.0138479	0.0144243	0.0135446	0.0135274	0.0137047	0.0137694	0.0143962	0.0135788	0.0162644	0.0135382	0.0138692	0.0140397	0.0137434	0.0135999	0.0127874	0.0138357	0.013471	0.0141876	0.0140392	0.0146246	0.0140816	0.0131191	0.0140991	0.0133835	0.013575	0.0130503	0.0146468	0.013381	0.0136694	0.0148818	0.012509	0.013843	0.0148089	0.0166763	0.0141462	0.0156212
0.0125439	0.0132559	0.0135574	0.01315	0.0134501	0.0132733	0.0139023	0.0141259	0.0137811	0.0132597	0.012958	0.0128923	0.0126509	0.0126388	0.0132467	0.0136585	0.0135496	0.0129156	0.0129725	0.013341	0.0134172	0.0130388	0.0118357	0.0130457	0.0144684	0.0147126	0.0138208	0.0138385	0.0121777	0.0133832	0.013287	0.0139441	0.0131823	0.0133493	0.0134535	0.0134355	0.0130523	0.0127908	0.0128471	0.0119723	0.0136372	0.012737	0.0135731	0.0132624	0.0124035	0.0131481	0.0134281	0.0146109	0.0131645	0.0135201
0.0170011	0.0139931	0.012904	0.0134272	0.0131569	0.0134483	0.0129722	0.0152293	0.0155606	0.0142418	0.0152135	0.015067	0.0149986	0.0129712	0.0135049	0.0148654	0.0136026	0.0138657	0.0131816	0.0129633	0.013995	0.0126409	0.0179466	0.0139809	0.0131974	0.0137032	0.0136019	0.0136724	0.0125352	0.0136182	0.0129886	0.0142326	0.0138057	0.0147421	0.0140374	0.0126438	0.013229	0.0138863	0.0134199	0.0127762	0.0140674	0.0127562	0.0130584	0.0145484	0.0127561	0.0133853	0.0144886	0.0165172	0.0142366	0.0142633
0.0139446	0.0142403	0.0137444	0.0148352	0.0140192	0.0139405	0.0139177	0.0160126	0.0152754	0.015058	0.0144364	0.014114	0.0143852	0.0134393	0.014212	0.0150357	0.0145033	0.0142245	0.0143046	0.0139781	0.0147511	0.0138606	0.0139864	0.0142123	0.0141667	0.0140744	0.014063	0.0139377	0.012844	0.0150447	0.0143985	0.0159137	0.0152203	0.0153893	0.0147434	0.0131617	0.0138122	0.0139754	0.015	0.0140275	0.0145174	0.0142369	0.014261	0.0153988	0.0126333	0.0139705	0.0152861	0.0183634	0.0157393	0.0145283
0.0133437	0.0141112	0.0142851	0.0149045	0.0140891	0.0137139	0.0138685	0.0147787	0.0142113	0.0136823	0.0141169	0.0136372	0.0137196	0.0134455	0.0147836	0.0152149	0.0143856	0.0148614	0.0140488	0.0140019	0.0139838	0.014784	0.0128192	0.0140073	0.0140617	0.0136272	0.0136035	0.0133487	0.0125412	0.0150063	0.0150775	0.0155977	0.0152189	0.0143163	0.0144648	0.0131986	0.0138632	0.0142422	0.015921	0.0132812	0.0135874	0.0160054	0.0141001	0.0140928	0.0134431	0.013862	0.0144437	0.0163599	0.0141598	0.0139215
0.0128872	0.0124017	0.0228215	0.0182239	0.0126536	0.0125777	0.0123456	0.014292	0.0144881	0.0130152	0.0130871	0.0130036	0.0129746	0.012099	0.0532629	0.0142113	0.0127396	0.0147017	0.0125101	0.0124165	0.0158097	0.012423	0.0123896	0.0155481	0.01261	0.0127915	0.0308542	0.0126677	0.0125875	0.0144709	0.0122982	0.0138336	0.0125849	0.0146648	0.0139857	0.0123835	0.0126897	0.0148686	0.0126226	0.0182426	0.0127639	0.012201	0.0125077	0.0213937	0.0125465	0.015033	0.013019	0.0144191	0.0127631	0.0127479
0.0128887	0.0129737	0.0125698	0.0130727	0.013079	0.0131224	0.0128195	0.0141222	0.0137233	0.0136024	0.0132369	0.0130305	0.0132755	0.0126258	0.0133648	0.0142312	0.0136145	0.0139233	0.0132496	0.0131521	0.0134247	0.0127144	0.0126504	0.0133568	0.0132639	0.0132301	0.0137642	0.0136386	0.0126502	0.0134482	0.0128004	0.0140465	0.0137271	0.013792	0.0136082	0.0132659	0.0130376	0.013365	0.0132272	0.0124931	0.0131346	0.0126305	0.0132065	0.0134038	0.0123369	0.0130687	0.0138107	0.0159066	0.0132992	0.0130456
0.013403	0.0133849	0.0132464	0.0134064	0.0133544	0.0134189	0.0131358	0.0146683	0.0142183	0.0140149	0.0140207	0.0135277	0.0135753	0.0130986	0.0146115	0.0145742	0.0136902	0.0142676	0.0135763	0.0137169	0.0139447	0.0131429	0.0122321	0.0134136	0.0135669	0.0138022	0.0138449	0.013916	0.0132997	0.0137363	0.013166	0.0144374	0.0139588	0.0140358	0.0140211	0.0132853	0.0133192	0.0134831	0.0135691	0.0127045	0.0133806	0.0129749	0.0136431	0.013903	0.0123638	0.0133418	0.0141692	0.0170731	0.0137296	0.0136305
0.0131285	0.0129336	0.0125127	0.0134501	0.0128007	0.0127431	0.0126322	0.0144969	0.013925	0.0137602	0.0136289	0.0132487	0.0133803	0.0122746	0.0130208	0.0142745	0.0135083	0.0141103	0.0129008	0.0125858	0.0134304	0.012726	0.0142282	0.0133489	0.0130961	0.0135019	0.0135067	0.0130711	0.012257	0.0135624	0.0129086	0.0145081	0.0139144	0.0141398	0.0137351	0.0129789	0.0127312	0.014141	0.013707	0.0129325	0.0134767	0.013053	0.0128546	0.0137922	0.0123717	0.0126664	0.0139914	0.0153636	0.0137085	0.0136228
0.013551	0.0128509	0.0133327	0.0129693	0.0132356	0.0135903	0.0128077	0.0153658	0.0152896	0.0138619	0.0140302	0.0138493	0.014312	0.0137108	0.0140959	0.0148556	0.0131488	0.0134589	0.0134291	0.0133643	0.0144336	0.0125822	0.0127938	0.0140475	0.0136814	0.0152725	0.0158627	0.0145961	0.0138161	0.013352	0.0130261	0.0136531	0.0139471	0.014269	0.0139691	0.0130818	0.0128288	0.0158074	0.0134307	0.0129379	0.0143841	0.0126791	0.0129909	0.01455	0.0128124	0.0133188	0.0140519	0.0166945	0.0138044	0.0146075
0.0133556	0.0142535	0.0141031	0.0146569	0.0137212	0.0132352	0.0137758	0.0143814	0.0137026	0.0135366	0.0133321	0.0131811	0.0134034	0.0132022	0.0129886	0.0141694	0.0136588	0.013828	0.013513	0.0138215	0.0135986	0.0141166	0.0132154	0.0134726	0.0138833	0.0135278	0.0139563	0.0132391	0.012519	0.0146772	0.0145245	0.0151029	0.0145687	0.0141118	0.0139976	0.0130731	0.0135798	0.0133464	0.0151576	0.0126824	0.0132887	0.0143871	0.0138888	0.0136324	0.0147507	0.0133667	0.0139836	0.0158368	0.0144385	0.0135985
0.0133633	0.0139993	0.0131938	0.0147622	0.0134093	0.0129025	0.0135741	0.0141506	0.0136791	0.0135222	0.0131733	0.012709	0.0130366	0.0126895	0.0126841	0.0133846	0.0132659	0.0129245	0.0133429	0.0134724	0.0133723	0.0137072	0.0144169	0.0129551	0.0133706	0.0132925	0.013272	0.0129749	0.0120159	0.0144366	0.0145209	0.0149261	0.0145278	0.0138422	0.0135341	0.0124626	0.0131136	0.0127214	0.0145025	0.0122937	0.0137711	0.0140566	0.0135334	0.0138225	0.0118767	0.0131367	0.013863	0.0152543	0.014634	0.0137619
0.0135122	0.0133842	0.0131381	0.0136664	0.0131786	0.0131344	0.0132646	0.0149719	0.0145805	0.0142178	0.0138615	0.0136825	0.013898	0.0126414	0.0136434	0.0142853	0.0133412	0.0135645	0.0137837	0.0131448	0.014215	0.0129168	0.0149994	0.013484	0.013314	0.0135482	0.0132531	0.0131713	0.0125169	0.0139455	0.0133301	0.0143638	0.0139695	0.0146529	0.0138695	0.0126117	0.0135689	0.0136153	0.0138407	0.0129976	0.0137997	0.0133562	0.0139805	0.0146193	0.0123259	0.0134421	0.0145075	0.017232	0.0145639	0.0141325
0.0133658	0.0135939	0.0131648	0.0137322	0.0132951	0.0132324	0.0131998	0.0148284	0.0142871	0.0139902	0.0136427	0.0133872	0.0136947	0.0127269	0.0138712	0.0142751	0.0134149	0.0137688	0.0138386	0.0132965	0.0140423	0.0136701	0.013362	0.0135668	0.0133526	0.0135659	0.0132949	0.0132922	0.0122553	0.0139981	0.0134749	0.0147353	0.0143111	0.0146808	0.0139545	0.0127336	0.0131851	0.0133738	0.0140756	0.0127666	0.0138049	0.0133784	0.0134613	0.0144386	0.0121958	0.0134104	0.0146713	0.0170104	0.0146991	0.0137947
0.0137742	0.0137425	0.0136657	0.0136675	0.0153223	0.0142855	0.0140931	0.0146237	0.0143621	0.0139613	0.0137839	0.013847	0.0140487	0.0139989	0.0133974	0.0152584	0.0141676	0.014025	0.0142519	0.0149109	0.0144887	0.0145168	0.0125504	0.0140275	0.0145148	0.0139998	0.0142139	0.0145422	0.0145371	0.014319	0.0138999	0.0149389	0.0147113	0.0141781	0.0155044	0.0142342	0.0138032	0.0137368	0.0140919	0.0126183	0.0136569	0.0137895	0.0138286	0.0138843	0.0135594	0.0151326	0.0139854	0.0160181	0.0135034	0.0134903
0.0136	0.0138962	0.0132994	0.0136721	0.0147554	0.0142569	0.0141577	0.0146713	0.0145216	0.01394	0.0139358	0.0140636	0.0139261	0.0140242	0.0136276	0.0151582	0.0139296	0.0140333	0.0142717	0.0143706	0.0145634	0.0144443	0.0125814	0.0139536	0.014255	0.0139814	0.014417	0.0144565	0.0148466	0.0142331	0.0135916	0.0148098	0.0144852	0.0141608	0.0151819	0.0143476	0.013863	0.013679	0.0138414	0.0126705	0.0136297	0.0134481	0.0140396	0.0137733	0.013839	0.0146617	0.0140094	0.0164336	0.0135419	0.013518
0.0132466	0.0139898	0.0130106	0.0135132	0.0140086	0.0145128	0.0146878	0.0147927	0.0144247	0.0139641	0.0137649	0.0138845	0.0138691	0.0137151	0.0130805	0.0143621	0.0135208	0.0142074	0.0137441	0.0138848	0.0143936	0.0133194	0.0130427	0.013819	0.0139824	0.0137683	0.0137154	0.0142683	0.0140908	0.0138857	0.0133781	0.0142499	0.0142384	0.0145453	0.0143566	0.0134396	0.0139247	0.0132632	0.0136475	0.0128042	0.0136536	0.0132492	0.0136796	0.0138672	0.0128365	0.0143201	0.0141526	0.0163941	0.0135855	0.0136739
0.0132402	0.0147791	0.0135572	0.0142995	0.0140781	0.0138111	0.0141511	0.0144475	0.0139128	0.0140244	0.013233	0.0130716	0.0132648	0.0135811	0.0129634	0.0139326	0.0137346	0.0136834	0.013796	0.0145864	0.0139406	0.0143837	0.0137364	0.0132734	0.0143615	0.014104	0.0142214	0.0138871	0.0125349	0.0146432	0.014359	0.0153388	0.0147399	0.0141694	0.014333	0.0134108	0.0137698	0.0131842	0.0147615	0.0125376	0.0135728	0.0143216	0.014644	0.0137946	0.0123599	0.0137498	0.0140622	0.0157322	0.013884	0.0137505
0.0127255	0.0130973	0.0120683	0.01258	0.0125007	0.0124016	0.0122209	0.0135386	0.0134233	0.0129945	0.0130235	0.012693	0.0129301	0.0120731	0.0125787	0.0136021	0.0127525	0.0136713	0.0124707	0.012361	0.0132359	0.0121187	0.0115362	0.0131546	0.0129675	0.013	0.0130008	0.0130164	0.0118794	0.0128319	0.0123741	0.0131204	0.0132799	0.0134352	0.0132172	0.0122661	0.013081	0.0131702	0.0125752	0.0127865	0.0128575	0.0120071	0.0123624	0.012943	0.0155882	0.0127781	0.013406	0.0158439	0.0123837	0.0129866
0.0134185	0.0131483	0.0151152	0.0133925	0.0140508	0.0134749	0.0156054	0.0147219	0.0142888	0.0139022	0.0141869	0.0138118	0.0139657	0.013506	0.0143833	0.0140172	0.0136355	0.0134081	0.0137271	0.0138406	0.014213	0.0135521	0.012223	0.0136786	0.0138029	0.013627	0.0138105	0.0139894	0.0130789	0.0159352	0.0133579	0.0162801	0.0149139	0.0146874	0.0159951	0.0135002	0.0128654	0.0131632	0.013787	0.0130416	0.0136386	0.0128665	0.0131982	0.0158253	0.0117085	0.0140577	0.0140216	0.0213344	0.0134333	0.0137658
0.0134555	0.0131335	0.0126075	0.0132522	0.0132534	0.0131148	0.0128879	0.0146417	0.0143868	0.0137399	0.0139668	0.013814	0.0135945	0.0127299	0.0141096	0.0151852	0.0136567	0.015919	0.0130897	0.0132039	0.0137605	0.0128146	0.0121432	0.0143771	0.0131355	0.0136046	0.0134205	0.0135342	0.0135177	0.0134328	0.0127969	0.0142564	0.0139554	0.0139091	0.0138757	0.0134621	0.013801	0.0145727	0.0136975	0.0142239	0.0132496	0.0127535	0.0130476	0.0137338	0.0161729	0.0133196	0.0139747	0.017308	0.0135126	0.0133322
0.0132623	0.0146712	0.0136339	0.0143985	0.0139241	0.013783	0.0144622	0.0145547	0.0141329	0.01402	0.0135313	0.0132284	0.0134919	0.0132336	0.0129522	0.0143184	0.0137521	0.0136084	0.01388	0.0140016	0.0137747	0.0136819	0.0143675	0.0132737	0.0139547	0.013714	0.0136576	0.0132319	0.0121312	0.0146364	0.0145142	0.0150198	0.0159566	0.014002	0.0141735	0.0127609	0.0137133	0.0131991	0.014517	0.0123797	0.0137805	0.0141332	0.0142906	0.0136831	0.012354	0.0136253	0.0139252	0.0155643	0.0139974	0.013835
0.0142076	0.0143522	0.0149843	0.0144557	0.0135191	0.0135948	0.0152385	0.0145611	0.0141254	0.0138733	0.0140422	0.0131948	0.0134071	0.0129169	0.0131113	0.013509	0.0133339	0.0135603	0.0133344	0.0134125	0.0138915	0.0139453	0.0179583	0.0131246	0.0139516	0.0136214	0.0137107	0.013429	0.0122745	0.0139108	0.0141086	0.0139874	0.0137446	0.0141838	0.0135164	0.0128866	0.0148721	0.0130556	0.013886	0.0132423	0.0146457	0.0141988	0.0142749	0.0147353	0.012267	0.0133306	0.0141904	0.0148582	0.0140724	0.0152559
0.0134844	0.0126366	0.0140802	0.0136989	0.0131174	0.0131651	0.0131779	0.0151758	0.0150428	0.0137844	0.0151699	0.0148303	0.0148022	0.0123487	0.0147224	0.0143366	0.0128544	0.0139144	0.0130465	0.0128765	0.014122	0.0132511	0.0148795	0.0137765	0.0129888	0.0135425	0.0133155	0.0129685	0.0120922	0.013418	0.0129112	0.0136298	0.0137715	0.0142311	0.0136154	0.0125813	0.0132406	0.0136083	0.0131421	0.0143217	0.0137277	0.0127513	0.0133926	0.014689	0.012383	0.0133572	0.0142289	0.0173967	0.013494	0.0144179
0.0147693	0.0128442	0.0125638	0.0129328	0.0138407	0.0135812	0.0128255	0.0151981	0.0143453	0.0145752	0.0138718	0.0141727	0.0145223	0.0131255	0.0136771	0.0139674	0.0134804	0.014235	0.0134759	0.0137613	0.0143445	0.012762	0.0330663	0.0137642	0.0142435	0.013313	0.0130594	0.0132639	0.0124519	0.0140512	0.0127424	0.0139368	0.0137137	0.0149746	0.0145293	0.0132565	0.0128418	0.0138079	0.0133934	0.0126538	0.0144948	0.0125946	0.0130935	0.0158619	0.0122804	0.0138326	0.0143905	0.0180312	0.0132342	0.0145317
0.015961	0.0145775	0.0140878	0.0133922	0.0136536	0.0146452	0.0153192	0.0146421	0.0142071	0.0150027	0.0140817	0.0139867	0.0136205	0.0128316	0.0125561	0.013446	0.0127548	0.0129535	0.0126946	0.0134438	0.0139146	0.0123739	0.0262752	0.0134597	0.0133343	0.0135296	0.0139594	0.013281	0.0130582	0.0134857	0.013395	0.0135535	0.0135833	0.0138311	0.0136121	0.0122911	0.0147081	0.0129727	0.0130538	0.0132709	0.0154817	0.0127856	0.0133477	0.0143917	0.0122073	0.0133905	0.0140577	0.0147304	0.013827	0.0161733
0.0126946	0.0126357	0.0141689	0.0129845	0.0147854	0.0155894	0.0145168	0.0136666	0.0136558	0.0127364	0.0135284	0.0139243	0.0137343	0.0167693	0.0146511	0.0145031	0.0145882	0.0130563	0.0147085	0.0153836	0.0143949	0.0138179	0.0116453	0.013583	0.0152977	0.0147155	0.015781	0.0155137	0.0152293	0.0135345	0.0134136	0.0141559	0.0138951	0.0131677	0.0148647	0.0148545	0.0141493	0.0128883	0.0133223	0.0129595	0.0131631	0.0132044	0.0132567	0.0131224	0.0127419	0.0149571	0.0132083	0.0145707	0.0126346	0.0135016
0.0145841	0.0137028	0.0135063	0.0136167	0.0130145	0.0139732	0.0129831	0.0153901	0.0150923	0.0149689	0.0158893	0.0148509	0.0154284	0.0125146	0.0152417	0.0140191	0.0132824	0.0134767	0.0131831	0.012837	0.0143999	0.0125514	0.0205206	0.0136217	0.0134632	0.0136658	0.015133	0.0135434	0.0125116	0.0140019	0.0130044	0.0141593	0.0138929	0.0153153	0.0140115	0.0124487	0.0134064	0.0134764	0.0135988	0.0129965	0.0145673	0.01266	0.0134249	0.0159647	0.0121506	0.0135631	0.015367	0.0181745	0.0142942	0.014776
0.0146181	0.0135539	0.012733	0.0135238	0.0132803	0.0137427	0.0131605	0.015453	0.0148403	0.0143298	0.0149021	0.0140529	0.0145117	0.0126904	0.0139068	0.0146496	0.0136355	0.014235	0.0134738	0.0131306	0.0144134	0.0130392	0.0182712	0.0138458	0.013336	0.0134834	0.013783	0.0134096	0.0124316	0.0140019	0.013222	0.014562	0.0142634	0.0154558	0.0141764	0.0126445	0.0136616	0.0140552	0.0139329	0.0129676	0.0142884	0.0129954	0.0138774	0.0150818	0.0126157	0.0136138	0.0152659	0.0172864	0.014225	0.0143782
0.0148056	0.014196	0.0136011	0.0143963	0.0140488	0.0141814	0.0138275	0.0166411	0.0158273	0.015187	0.0157068	0.0148692	0.0150534	0.0139673	0.0144151	0.01681	0.0145767	0.0155451	0.0141266	0.0136117	0.0153221	0.0136011	0.0141404	0.015362	0.0140161	0.0147322	0.0144076	0.0139396	0.013967	0.0147601	0.0138415	0.0155055	0.0152125	0.0162562	0.0150482	0.0141193	0.0144359	0.0153673	0.0147292	0.0138427	0.0147374	0.0137849	0.0141646	0.0155939	0.0155586	0.0142705	0.0158585	0.0193292	0.0148845	0.015054
0.0136553	0.0137637	0.0128116	0.013733	0.0135596	0.0136924	0.0133979	0.0148226	0.0142945	0.0139974	0.0143735	0.013799	0.0139319	0.0131723	0.0139406	0.0172298	0.0145749	0.0172306	0.0134922	0.0133522	0.0142966	0.0132053	0.012742	0.0148638	0.0135277	0.0137983	0.0138044	0.0134664	0.0128543	0.0139294	0.0132296	0.0145598	0.0146283	0.0148422	0.0144574	0.0130843	0.0156489	0.0151574	0.014035	0.0127521	0.0136138	0.0131787	0.0135465	0.0139642	0.0168528	0.0141132	0.0143013	0.0169034	0.0135723	0.0138184
0.0140585	0.0136835	0.0128347	0.0134568	0.012823	0.0133339	0.0130986	0.0151687	0.0146304	0.0147992	0.0146773	0.0141227	0.0142199	0.0123707	0.0143462	0.0142488	0.0137289	0.0141909	0.0131503	0.0127905	0.0141145	0.0129018	0.0179656	0.0135423	0.0130394	0.0134454	0.0136938	0.013003	0.012293	0.0137295	0.0132289	0.0143855	0.013703	0.0152512	0.013817	0.0123946	0.0132425	0.0136941	0.0138897	0.0126152	0.014031	0.0127771	0.0135631	0.0144726	0.0124669	0.013004	0.0151716	0.0175111	0.0143863	0.0142576
0.0145121	0.0150002	0.0132844	0.0133947	0.0130223	0.0138238	0.013782	0.0151172	0.0148586	0.0149349	0.0141787	0.0138524	0.014304	0.0126594	0.01457	0.0140502	0.0134736	0.0137415	0.0130285	0.0129598	0.0140822	0.0124379	0.0177471	0.0134558	0.0132109	0.0134765	0.0137104	0.0129126	0.0121546	0.0135264	0.0129811	0.0138821	0.0134705	0.0151809	0.0136148	0.0123998	0.0140918	0.0137585	0.0133228	0.012924	0.014838	0.0126924	0.0134233	0.0154911	0.0126546	0.0134865	0.015649	0.0160068	0.0141444	0.0149457
0.0132456	0.0141666	0.013666	0.014177	0.0137231	0.0139159	0.0140351	0.0150574	0.0144896	0.0144237	0.0138825	0.0134836	0.0137129	0.0130591	0.0143403	0.0142129	0.0138293	0.0135396	0.0137685	0.0137427	0.0139782	0.0137943	0.0143463	0.0135482	0.0136628	0.0139221	0.0136772	0.0133903	0.0124511	0.0143351	0.0138171	0.0145719	0.0143198	0.0143208	0.0140419	0.0130205	0.0137584	0.0133513	0.0142671	0.0130689	0.0138157	0.0137558	0.0140028	0.0143027	0.0124322	0.0135912	0.0144741	0.0167032	0.0143145	0.0143932
0.0150045	0.0141562	0.0130462	0.0138461	0.0134377	0.0137096	0.013481	0.0159544	0.0155329	0.0161809	0.0149777	0.0146016	0.0147553	0.0134564	0.0150451	0.0145816	0.0135338	0.0139361	0.0136128	0.0132618	0.0145788	0.012924	0.0161916	0.0140995	0.0136096	0.0140945	0.0136927	0.0133611	0.0126252	0.0143805	0.0136594	0.0148369	0.0143646	0.0153462	0.0142258	0.012872	0.0135977	0.0141022	0.0142402	0.0132139	0.0148282	0.0131225	0.0136831	0.0153711	0.0126312	0.0135079	0.0151908	0.0183734	0.014754	0.0155183
0.0138547	0.0137934	0.0133452	0.0134073	0.0142797	0.014259	0.0139567	0.0147081	0.0143754	0.0138131	0.0141413	0.0143964	0.0139849	0.0138411	0.0138839	0.0156646	0.0141436	0.0143054	0.0141296	0.0140469	0.0144883	0.0137248	0.0126135	0.0140055	0.0140287	0.0140184	0.0141895	0.0142883	0.0130622	0.0140374	0.0135358	0.014364	0.0144126	0.013951	0.0150245	0.0137235	0.0139156	0.0139785	0.0136972	0.0128526	0.0136072	0.0133783	0.0136824	0.014077	0.0144832	0.0142843	0.0138166	0.0167179	0.0136491	0.0135041
0.0158785	0.0140594	0.0140216	0.0142562	0.0149103	0.0149257	0.0141166	0.0155667	0.0156389	0.0146358	0.0154214	0.015834	0.0151974	0.015402	0.014471	0.017057	0.015068	0.015127	0.0148774	0.0147962	0.0152936	0.0141304	0.0133486	0.0163626	0.0147818	0.0149249	0.0146427	0.0150227	0.0138197	0.0151453	0.014465	0.0157421	0.0160092	0.0149689	0.0163218	0.0146517	0.0143252	0.015949	0.0147967	0.0140161	0.014295	0.0141664	0.0140817	0.0145083	0.0158929	0.0148112	0.014674	0.0178594	0.0142543	0.0141711
0.0136604	0.0154062	0.0131417	0.0139025	0.0132859	0.0134279	0.0141636	0.0152247	0.014538	0.0149665	0.0158519	0.0138404	0.0149185	0.0132091	0.0133409	0.0139325	0.0135805	0.0137608	0.0128963	0.0133951	0.0139519	0.0125658	0.0128996	0.0133587	0.0135936	0.0133533	0.0135017	0.0127106	0.0117997	0.0142884	0.0137634	0.0153987	0.0136992	0.0144926	0.0135491	0.0125678	0.0139989	0.0131283	0.0136501	0.0125496	0.0142001	0.0130182	0.0132837	0.0144667	0.0119611	0.0134513	0.0149259	0.0169861	0.0141042	0.0147917
0.0143097	0.0140112	0.0130243	0.0138003	0.0133799	0.0137635	0.0139103	0.015676	0.0154387	0.0149723	0.0151011	0.0145301	0.0150961	0.0128806	0.0137381	0.0147458	0.0136496	0.0145623	0.0134959	0.0133762	0.0146879	0.0131467	0.0148096	0.0142893	0.0133817	0.0140051	0.0136608	0.0135075	0.012795	0.0142164	0.0131334	0.0147803	0.014275	0.0174927	0.0141852	0.0128143	0.0140395	0.0144547	0.0139888	0.0130962	0.0146477	0.0130092	0.0135787	0.0154559	0.0130869	0.0137559	0.0166409	0.0183422	0.0145163	0.0145825
0.0155554	0.0149046	0.013977	0.0140729	0.014341	0.0138885	0.0139688	0.0147504	0.0143849	0.0134	0.014848	0.0136255	0.0135819	0.0131642	0.0133265	0.0139984	0.0144416	0.0134782	0.0138035	0.0136067	0.0138262	0.0132064	0.0124381	0.0133563	0.0141881	0.0136077	0.0138102	0.0135395	0.0121587	0.0145562	0.0141059	0.0149608	0.0150285	0.0141772	0.013742	0.0131299	0.0142831	0.0137585	0.0136764	0.0126699	0.0147855	0.0131807	0.0143294	0.0140131	0.0126401	0.0135512	0.0140252	0.0167468	0.0135217	0.0142193
0.0145412	0.0135104	0.0136796	0.0136382	0.0141782	0.0137815	0.0136155	0.0149616	0.0147258	0.0136491	0.0142689	0.0140292	0.0141867	0.0136079	0.01531	0.0151832	0.0139449	0.0140515	0.0138313	0.0137753	0.0142533	0.0132688	0.0127862	0.0142151	0.0139709	0.0136888	0.0143438	0.0140814	0.0135042	0.0142312	0.0136442	0.0150866	0.0142825	0.0141399	0.0145748	0.0133536	0.0133656	0.0141423	0.0138962	0.0128807	0.0138493	0.0133555	0.0133952	0.0140147	0.0142277	0.013818	0.014039	0.0167481	0.0136458	0.0137724
0.0143029	0.0139331	0.0132082	0.0142396	0.013768	0.0138424	0.0138137	0.0165263	0.015479	0.0150847	0.0148466	0.0143026	0.0146781	0.0131639	0.0145044	0.0153042	0.0139348	0.0146253	0.0139318	0.0136005	0.0152115	0.0134211	0.013968	0.0142618	0.0140754	0.0142358	0.014134	0.0142421	0.0130231	0.0146276	0.0137869	0.0152712	0.0148814	0.0158848	0.0147949	0.0130772	0.0138008	0.0142676	0.014309	0.013385	0.0149512	0.0135501	0.0139656	0.0153267	0.0127452	0.0140017	0.0155492	0.0189849	0.0149199	0.0149791
0.0145375	0.013887	0.0137545	0.0140984	0.0137765	0.0140321	0.014012	0.017041	0.0160018	0.0148797	0.0151651	0.0148114	0.0152155	0.0133348	0.0147072	0.0150155	0.013981	0.0143635	0.0137132	0.013738	0.0151672	0.01348	0.0143244	0.0142803	0.0140161	0.0143367	0.0142785	0.0139303	0.0127857	0.0144288	0.0137434	0.0151142	0.0147206	0.0156868	0.0146169	0.0132125	0.014017	0.0141385	0.0143403	0.0146059	0.0149568	0.0135135	0.0141381	0.0154788	0.0132474	0.0139441	0.0155862	0.0193176	0.0147752	0.015159
0.0138078	0.0139855	0.0136218	0.0136184	0.013805	0.0138266	0.0137677	0.0142077	0.0139787	0.0133602	0.013731	0.0139074	0.0138243	0.0134822	0.0140514	0.0152854	0.0142588	0.0143756	0.0137842	0.0135318	0.0140079	0.0133658	0.0119899	0.0151382	0.0135722	0.0137333	0.0139964	0.0135468	0.0141064	0.0139025	0.0135328	0.0143914	0.0142833	0.0138894	0.0141104	0.013233	0.0139148	0.0156756	0.013588	0.0123504	0.0131934	0.0131166	0.0133938	0.013382	0.0136257	0.0137518	0.0137139	0.0158021	0.0129927	0.0133108
0.0145692	0.013839	0.0132458	0.0138951	0.0136141	0.0138754	0.0140942	0.0166882	0.0158706	0.0147888	0.0146673	0.0143178	0.0148676	0.0131731	0.0141232	0.0148399	0.0139111	0.0143693	0.0137919	0.0134928	0.0150364	0.0134935	0.0146605	0.0139622	0.0138455	0.0143399	0.0138014	0.0138394	0.0127191	0.0143452	0.0135534	0.0149393	0.0145485	0.0153175	0.0144886	0.0129527	0.0138816	0.0140499	0.0141632	0.0132194	0.014918	0.0134719	0.0142785	0.015512	0.0132989	0.0138552	0.0153229	0.0178521	0.0145949	0.0148731
0.013593	0.012581	0.0126762	0.0127266	0.013067	0.0132398	0.0125076	0.0141642	0.0136223	0.0131962	0.0132996	0.0138971	0.013511	0.0128511	0.0136543	0.0152502	0.0133793	0.0141088	0.0129858	0.013264	0.0133446	0.012468	0.0116978	0.0195948	0.0129836	0.0132582	0.0135151	0.0129664	0.0132319	0.0129572	0.0126177	0.0134755	0.0138547	0.0134964	0.0134881	0.0125126	0.013386	0.0178964	0.012963	0.0126254	0.0125863	0.0123937	0.0135938	0.0129401	0.0146648	0.0131253	0.0134682	0.0156087	0.0126045	0.0126309
0.0135812	0.0136096	0.01305	0.0136165	0.0136764	0.0136307	0.0137549	0.0145308	0.0143415	0.0138287	0.0137305	0.0135784	0.0143537	0.0133121	0.0138775	0.017809	0.0143794	0.0162015	0.0135112	0.0134258	0.01422	0.0134792	0.0119212	0.0157812	0.0133254	0.0135805	0.0136098	0.0134726	0.0135046	0.0136813	0.0134235	0.0142319	0.0147715	0.0142291	0.0141975	0.0132356	0.0149333	0.0162278	0.013908	0.0127474	0.0133754	0.0129911	0.0130825	0.0137758	0.0178243	0.0141058	0.0139811	0.0168784	0.0133761	0.0143209
0.0129399	0.0140768	0.0130226	0.0137221	0.0132427	0.0131761	0.0134208	0.0153779	0.0144686	0.0144565	0.0137909	0.013899	0.0136302	0.0127788	0.0164493	0.0140651	0.0132671	0.013191	0.0135317	0.0142861	0.0142965	0.0126717	0.0127214	0.0136511	0.0134555	0.0136877	0.0131029	0.0129606	0.0123467	0.0137804	0.0137112	0.0143688	0.0147876	0.0141531	0.0136269	0.0131261	0.0132683	0.0131733	0.013742	0.0144725	0.0164255	0.0131594	0.0140461	0.014304	0.0118469	0.0131822	0.0142134	0.0185484	0.0138326	0.0163923
0.0128104	0.015342	0.0139461	0.0146709	0.0145232	0.013879	0.0145443	0.0141658	0.0137015	0.0133773	0.0131795	0.0127867	0.0131693	0.0138202	0.0130055	0.0140587	0.0140037	0.0132789	0.0138225	0.0151415	0.0137553	0.0142478	0.0122284	0.0132325	0.0146412	0.0139797	0.0140593	0.0140159	0.0125366	0.014685	0.0147729	0.0148888	0.014375	0.0137643	0.0142671	0.0135906	0.0141071	0.0128893	0.0143729	0.0123379	0.0135016	0.0143936	0.0147422	0.0134035	0.0155121	0.0139498	0.01363	0.0151336	0.0135012	0.0137431
0.0131894	0.0142421	0.014121	0.0141403	0.0141568	0.0136771	0.014604	0.0143283	0.0137597	0.0135909	0.0133321	0.0131694	0.0134114	0.0135477	0.0131564	0.0145224	0.0138017	0.0135375	0.0138099	0.0143545	0.0136171	0.0141123	0.0133302	0.0134117	0.0142795	0.0137082	0.0139602	0.0138638	0.0126437	0.014439	0.0144433	0.0147936	0.0145803	0.0139222	0.014204	0.0134231	0.0135173	0.0132	0.0144031	0.0126699	0.0135422	0.0141668	0.0141594	0.0135281	0.0124678	0.0139125	0.0139856	0.0151413	0.0137987	0.0136773
0.0155634	0.0132431	0.0128944	0.0134547	0.0132068	0.0137421	0.0132041	0.0153389	0.0153046	0.0141865	0.0145954	0.0153912	0.0147864	0.0128905	0.0139303	0.0152494	0.0136157	0.0144601	0.0133818	0.0132716	0.0144461	0.0129273	0.0139187	0.0145547	0.0133178	0.0141643	0.0137801	0.013721	0.0132055	0.0136979	0.0131127	0.0142717	0.0140094	0.0149274	0.0141131	0.012984	0.0135601	0.0144383	0.0135756	0.012712	0.0140013	0.0129177	0.0133872	0.0146022	0.0131636	0.0136665	0.014586	0.0171808	0.0138138	0.0143019
0.0169717	0.0139224	0.0132932	0.0137216	0.013492	0.0139413	0.0136193	0.0159122	0.0162663	0.014671	0.0152189	0.0151475	0.0149936	0.0132168	0.0139751	0.0148445	0.0135802	0.0139132	0.013531	0.013531	0.0145065	0.0129649	0.014513	0.0141272	0.0136135	0.0140254	0.0138243	0.0137362	0.0129239	0.0141139	0.0133059	0.0145403	0.0142633	0.0151615	0.0142975	0.0130275	0.0136966	0.0139328	0.0137898	0.0132806	0.0146814	0.0130421	0.0137618	0.0151264	0.0126108	0.0137478	0.0149374	0.0180534	0.0145282	0.0146769
0.0131961	0.0130983	0.0127806	0.0130101	0.0134594	0.014022	0.0132303	0.0146913	0.0143	0.0138886	0.0135817	0.0139819	0.013871	0.0136784	0.0130432	0.0142826	0.0132654	0.0141343	0.0137608	0.0134972	0.014009	0.0126724	0.0135245	0.0134321	0.0135571	0.0134832	0.0142084	0.0141092	0.0132478	0.0136275	0.0130011	0.0141769	0.0141594	0.0140094	0.0139517	0.01297	0.0134048	0.0133175	0.0134635	0.0125396	0.0135303	0.0128564	0.013566	0.0138758	0.012602	0.0134682	0.0139309	0.0161046	0.0133652	0.01359
0.0144245	0.0135064	0.0142626	0.0132236	0.013681	0.0136822	0.0137118	0.014633	0.0144202	0.0137198	0.0142256	0.0148213	0.0140922	0.0133653	0.01423	0.0148843	0.0134958	0.013746	0.013487	0.013829	0.0139427	0.0136249	0.0121338	0.0141312	0.0135608	0.0134326	0.0140431	0.0137721	0.0126592	0.0136859	0.0131046	0.0140048	0.0142966	0.0139791	0.0145829	0.0136788	0.0134063	0.0141284	0.0134661	0.0132846	0.0135854	0.0131403	0.0135712	0.014182	0.0138706	0.0135989	0.0140893	0.0163925	0.0134892	0.0134571
0.0134402	0.0137112	0.0134995	0.0137592	0.0135733	0.0136316	0.0134375	0.0149021	0.0143549	0.0142128	0.0138784	0.0135981	0.0140542	0.0130469	0.0134923	0.0142363	0.0136059	0.0137466	0.0141248	0.0136813	0.0140554	0.0137337	0.0134324	0.0135146	0.013499	0.0135247	0.0136379	0.013553	0.0124354	0.0140056	0.0134812	0.0145489	0.0144394	0.0145484	0.0139966	0.0128919	0.013323	0.0133527	0.0141697	0.013287	0.0139509	0.0135265	0.0137549	0.0143887	0.0123371	0.0136465	0.0145494	0.0166454	0.0143622	0.0140316
0.0132122	0.0139957	0.0148293	0.0139044	0.014623	0.0138973	0.0143054	0.0143749	0.0140452	0.0133571	0.0135704	0.0136386	0.0136492	0.0140128	0.0132603	0.0146449	0.0138224	0.0135597	0.0140544	0.0145347	0.0141391	0.0142563	0.0121227	0.013667	0.0142916	0.0137143	0.0140185	0.0140042	0.0131546	0.0142296	0.0143962	0.0147586	0.0145092	0.0137884	0.0145946	0.0137578	0.0138299	0.0133731	0.0139566	0.012436	0.01346	0.0140166	0.0139346	0.0134772	0.0139901	0.0143513	0.0137187	0.0151823	0.0132643	0.0134955
0.0133196	0.0141341	0.0133337	0.0143827	0.0132587	0.0134791	0.0134142	0.0141972	0.0138296	0.0137432	0.0131326	0.0129912	0.0131008	0.0126252	0.0132952	0.0136556	0.0135439	0.0131852	0.0134244	0.0129076	0.0135393	0.0130366	0.0139493	0.0133105	0.0133509	0.0131457	0.0135173	0.0132014	0.0121338	0.0139253	0.0136936	0.0148239	0.0142539	0.0139052	0.0136482	0.0126103	0.013568	0.0130375	0.014209	0.0126136	0.013649	0.0136227	0.0133876	0.0140034	0.0119878	0.0133615	0.0139141	0.0158164	0.0157436	0.0137861
0.0134747	0.0138275	0.013833	0.0146657	0.0136357	0.0136532	0.0135686	0.0152444	0.0146751	0.0145468	0.0141011	0.0137169	0.0140263	0.0131294	0.0136164	0.014518	0.0137179	0.0139784	0.0139665	0.0133545	0.0142094	0.013658	0.0141556	0.0141569	0.013764	0.0139292	0.0136864	0.0135779	0.012532	0.0143714	0.0141555	0.0153495	0.0147008	0.0150307	0.0142464	0.0130786	0.0135879	0.013995	0.0146254	0.0131766	0.0140499	0.0140982	0.0137692	0.014502	0.012473	0.0136746	0.0149185	0.0173124	0.0155993	0.0141947
0.013773	0.0139015	0.0131734	0.0142388	0.0132956	0.013455	0.013319	0.0155327	0.0148143	0.0147311	0.014079	0.0137302	0.0141636	0.0128306	0.013995	0.0143588	0.0135525	0.0139974	0.0139015	0.0131104	0.0143052	0.0130161	0.0144388	0.0140943	0.0134155	0.0138995	0.0133502	0.0133229	0.0124146	0.0141529	0.0137337	0.0150376	0.0146665	0.0151957	0.0140003	0.0128856	0.013474	0.0139479	0.0145056	0.0130262	0.0142734	0.0135901	0.013652	0.0148017	0.0124392	0.0134501	0.0151689	0.0177745	0.0154526	0.0142802
0.0134704	0.0154013	0.0150938	0.0137898	0.0137097	0.0139885	0.0143191	0.0154165	0.0146937	0.0135927	0.0143947	0.013952	0.0139683	0.0131762	0.0133844	0.0145696	0.0144033	0.0137558	0.0137545	0.0147805	0.0145713	0.0136634	0.0125471	0.014337	0.0142646	0.0142205	0.013758	0.0138521	0.0125304	0.0142802	0.0140349	0.014537	0.0141806	0.0147601	0.014276	0.0131643	0.0142371	0.0140714	0.0139775	0.0126438	0.0136623	0.0136079	0.0141612	0.0140605	0.0127745	0.0140679	0.0147116	0.0165486	0.0136433	0.0142595
0.0125244	0.014722	0.0123839	0.0134266	0.0131704	0.0126811	0.0126637	0.0141229	0.0134358	0.0128766	0.0129947	0.0126573	0.0129317	0.0128395	0.0128805	0.0153746	0.0144016	0.0148131	0.0129312	0.0131095	0.013513	0.0133909	0.0118093	0.0137842	0.0132623	0.0129854	0.0128542	0.0126751	0.0121165	0.0134663	0.0130164	0.0138782	0.0133038	0.0138386	0.0136412	0.0125865	0.0137033	0.0147532	0.0133133	0.0123065	0.0129587	0.012867	0.0128969	0.0132649	0.0179054	0.0132062	0.0134936	0.0152148	0.0129276	0.0128478
0.0182922	0.0146089	0.0135878	0.0135535	0.013431	0.0136966	0.0134744	0.0153602	0.016017	0.0142531	0.0148839	0.015366	0.0145315	0.0128025	0.0136061	0.0147829	0.0137234	0.0138216	0.0132727	0.013125	0.0141924	0.0126728	0.0174417	0.0139987	0.0135773	0.0138123	0.0138001	0.0136853	0.0125806	0.0138466	0.0134435	0.0142337	0.014082	0.0147434	0.0141188	0.0130043	0.013292	0.0143386	0.0136783	0.0129184	0.0145471	0.0128129	0.0135331	0.0147437	0.0126255	0.0135384	0.0147551	0.0170718	0.0143161	0.0144129
0.0164322	0.0137794	0.0137416	0.0141996	0.0143074	0.0145436	0.014142	0.0175763	0.0163907	0.015654	0.0155975	0.0158601	0.0155044	0.0137619	0.0153957	0.0158584	0.0144192	0.0149784	0.0142788	0.0144165	0.0159532	0.0136298	0.0143049	0.015032	0.0144621	0.0147161	0.0150798	0.0144977	0.0133024	0.0149381	0.0138409	0.0156095	0.0152924	0.015827	0.0152964	0.0137031	0.0143047	0.0147441	0.0146363	0.0144509	0.0151224	0.0138225	0.0145752	0.0154738	0.0133057	0.0144358	0.0157145	0.0201001	0.0149443	0.0150711
0.013477	0.0142421	0.0142085	0.0145118	0.0138592	0.0135218	0.013864	0.0148559	0.0142951	0.0136033	0.0139971	0.0135396	0.0137359	0.0132387	0.0135468	0.0145574	0.0139046	0.0134983	0.0138576	0.0138992	0.0138992	0.0142902	0.013124	0.0136783	0.0139017	0.0139934	0.0139643	0.0136503	0.0122976	0.014953	0.0165654	0.0157482	0.0150476	0.0141141	0.0143247	0.01285	0.0132768	0.0132508	0.0153417	0.012529	0.0137833	0.0151113	0.0142587	0.0138348	0.0130848	0.0136773	0.0140012	0.0162152	0.0139746	0.0140178
0.0137968	0.0135292	0.0128679	0.0137464	0.0133877	0.0131559	0.0129372	0.0143956	0.014092	0.0135369	0.0137838	0.0135993	0.0139774	0.0130454	0.0139145	0.0171634	0.0138907	0.0155128	0.013386	0.013064	0.013834	0.0131458	0.0120018	0.0174091	0.0131318	0.0136785	0.0136322	0.0133583	0.0136737	0.0135871	0.0130251	0.014194	0.0141355	0.0144643	0.0139484	0.0132406	0.0142379	0.0192115	0.0136591	0.0128332	0.0132957	0.0132323	0.0131898	0.0134195	0.0199467	0.0137707	0.0140656	0.0162447	0.0131058	0.0133213
0.0138207	0.0138431	0.0134674	0.0141234	0.0142094	0.0141486	0.0141989	0.0154134	0.014819	0.0147809	0.0142632	0.014381	0.0145179	0.0138878	0.0140798	0.0149678	0.0137425	0.0141141	0.0139192	0.0141001	0.0145422	0.0135801	0.0135143	0.0140078	0.0142864	0.0140111	0.0141537	0.0139468	0.013154	0.0143977	0.0139996	0.0149237	0.0153104	0.0146213	0.0146599	0.0133115	0.0139846	0.0139448	0.0142767	0.0132874	0.0143143	0.0138111	0.0142396	0.0144224	0.0152092	0.0140574	0.0146115	0.0170985	0.0140981	0.0142816
0.012646	0.0144105	0.0143634	0.013599	0.0152981	0.0148425	0.0148576	0.0137507	0.0134901	0.0132032	0.012804	0.0128469	0.0130831	0.0146331	0.0131972	0.0148161	0.0142139	0.0135689	0.0151151	0.0157328	0.0140526	0.0165894	0.011842	0.0133342	0.0145982	0.0142429	0.0141514	0.0149003	0.0132622	0.0139321	0.0136861	0.0144475	0.0141471	0.0135765	0.0148509	0.0151381	0.0132787	0.0126948	0.0137204	0.011982	0.0130796	0.0138195	0.0143503	0.0132546	0.0179082	0.014984	0.0134702	0.014618	0.0128365	0.0132224
0.0133821	0.0146158	0.0134022	0.0141326	0.0138826	0.0139421	0.0143899	0.015182	0.014417	0.0140697	0.0139083	0.0135127	0.0137388	0.0134079	0.0133259	0.0145634	0.013827	0.0138926	0.0138318	0.0139518	0.0143496	0.0139817	0.0134073	0.0135292	0.0141923	0.013949	0.0143189	0.0139413	0.0127187	0.0144811	0.0140952	0.0148761	0.0150608	0.0145128	0.0144634	0.0133034	0.0135966	0.0133675	0.014135	0.0128066	0.0141827	0.0135317	0.014192	0.0142161	0.0125186	0.0139375	0.0143075	0.0163805	0.0139695	0.0140254
0.0131547	0.0139217	0.0134755	0.0150925	0.0138072	0.0132824	0.0132769	0.0152127	0.0146395	0.0151527	0.014017	0.0136052	0.0141176	0.0128968	0.0140243	0.0141467	0.0141781	0.0145031	0.0139908	0.0141429	0.0139855	0.0140187	0.0178366	0.0144539	0.0135153	0.0137839	0.0138926	0.0132548	0.0123045	0.0148364	0.0144595	0.0162449	0.0152503	0.0157208	0.0142226	0.0127557	0.0131476	0.0140948	0.0161994	0.0129473	0.0138377	0.0147308	0.014553	0.0141487	0.0129661	0.0132938	0.0151162	0.0184069	0.0145502	0.0138948
0.0142662	0.0156174	0.0137922	0.0138412	0.0132619	0.0146372	0.0133502	0.0150851	0.0140558	0.0158492	0.0143952	0.0146447	0.0145144	0.012662	0.0128219	0.0142193	0.0139496	0.0134103	0.0137966	0.0131494	0.0142264	0.013443	0.0215857	0.0132982	0.014042	0.0137663	0.014162	0.0140097	0.0128542	0.013589	0.0135426	0.0136978	0.0138313	0.0150431	0.0135765	0.0125227	0.0133497	0.0132215	0.013536	0.0122244	0.0140059	0.013026	0.0142149	0.0154802	0.0124519	0.0131828	0.0147538	0.0158431	0.0140607	0.0143119
0.0144462	0.0145594	0.0135482	0.0136427	0.0136588	0.0142243	0.0144662	0.0155079	0.0153139	0.0145223	0.0150212	0.0145129	0.0146376	0.0131876	0.014386	0.0141892	0.0133913	0.0133486	0.0135649	0.0135094	0.0143148	0.0133078	0.0175718	0.0136774	0.013874	0.0135551	0.0132859	0.0136432	0.0127929	0.0138856	0.013525	0.0142439	0.013961	0.0148279	0.0140286	0.0131801	0.014586	0.0136144	0.0137763	0.0132597	0.0156895	0.0132171	0.0137773	0.0155963	0.016835	0.0137512	0.0149112	0.0168934	0.0143697	0.0150018
0.0132297	0.0143514	0.0135526	0.0136177	0.01453	0.0148097	0.0139993	0.0141231	0.0140627	0.0133455	0.0136708	0.0140921	0.0137045	0.0141855	0.0136575	0.0144101	0.014022	0.0134122	0.0141644	0.0148189	0.0139795	0.0142579	0.0119756	0.0137057	0.0145323	0.0139256	0.014617	0.0151995	0.0135935	0.0137823	0.0137565	0.0140773	0.0140279	0.0135641	0.0145636	0.014589	0.0137103	0.0129569	0.0135787	0.0122536	0.0131637	0.0136239	0.013707	0.0133521	0.0167379	0.0141814	0.0134183	0.0151583	0.0132449	0.0133798
0.0137038	0.0140387	0.0133443	0.0137409	0.0140937	0.0143086	0.0146284	0.0149276	0.0144268	0.0139664	0.0136688	0.0136288	0.0138167	0.0135618	0.0136171	0.0150214	0.0138233	0.0143216	0.0138912	0.0140794	0.0145834	0.0135347	0.0133776	0.0139242	0.0139536	0.0139684	0.0137937	0.0138244	0.0133665	0.0141199	0.0136001	0.0145978	0.0144165	0.01446	0.0144789	0.0134369	0.0138606	0.0138521	0.0139697	0.0125129	0.013795	0.013374	0.0137634	0.013985	0.0128833	0.0148227	0.0143489	0.0162098	0.013647	0.0139769
0.0129479	0.0132169	0.0118582	0.0126551	0.0125306	0.0127023	0.012312	0.0137572	0.013391	0.0131878	0.0131069	0.0127232	0.012954	0.0123816	0.0130921	0.0139879	0.0127995	0.0151841	0.0125443	0.0127811	0.0132664	0.0121665	0.0115512	0.013185	0.0125169	0.0129456	0.0125148	0.0125204	0.0123047	0.0127344	0.0121748	0.0132499	0.0135488	0.0134062	0.0134025	0.0122511	0.0139271	0.0135056	0.0128325	0.0124376	0.0125924	0.0120436	0.0128273	0.0127818	0.0148378	0.0127119	0.0133945	0.0170519	0.0126312	0.0128055
0.0131989	0.012797	0.0152063	0.013521	0.0150812	0.0150148	0.0144231	0.0147109	0.014054	0.0132991	0.0151794	0.0132542	0.013334	0.0145629	0.0127812	0.0151681	0.0149277	0.0139775	0.0146291	0.01464	0.0149862	0.0148481	0.0122508	0.0134253	0.014513	0.0140657	0.0132138	0.0133804	0.0131472	0.0137036	0.0133524	0.0139207	0.0133291	0.0142337	0.0153746	0.0138889	0.0171746	0.0128662	0.0139052	0.0120382	0.014492	0.0134574	0.0142231	0.0143242	0.0130465	0.0147301	0.0143037	0.0151676	0.0129247	0.0138937
0.0141625	0.0137934	0.0130713	0.0138164	0.0133	0.0135909	0.0135946	0.016328	0.0156611	0.0150426	0.0148948	0.0148175	0.0148274	0.0128859	0.014386	0.0147681	0.013822	0.0144512	0.0134892	0.0131675	0.0146949	0.0130158	0.0153309	0.0143339	0.0136077	0.0142697	0.0137329	0.0134402	0.0126835	0.014078	0.0134094	0.0145888	0.0144554	0.0155618	0.0141532	0.012767	0.0136431	0.0146122	0.0140813	0.0134675	0.0146917	0.0132406	0.013722	0.0153101	0.0127636	0.0136275	0.0153856	0.0184665	0.0149712	0.01453
0.0143876	0.0137887	0.0129052	0.0135999	0.0134084	0.0136228	0.0134837	0.0157463	0.0151624	0.0143964	0.014783	0.0141907	0.0146034	0.0129917	0.0138225	0.0144194	0.0135469	0.0140274	0.0136476	0.0132873	0.0143212	0.0132513	0.014177	0.0137596	0.0134656	0.0138262	0.0134827	0.0136799	0.0127837	0.0141229	0.0131975	0.014519	0.0142001	0.015139	0.0141828	0.0129505	0.0134746	0.0137831	0.0139563	0.0132228	0.0143711	0.0130775	0.0138204	0.0150758	0.0124761	0.0134738	0.0150765	0.0177572	0.0145824	0.0144464
0.0123339	0.0144121	0.0151103	0.0142439	0.0141789	0.0150545	0.0165706	0.0134967	0.0132469	0.0128483	0.0125036	0.0124106	0.0128548	0.013854	0.0132708	0.0133057	0.0133796	0.0128674	0.0140257	0.0148136	0.0135343	0.0142956	0.0119656	0.0137302	0.0140891	0.0135189	0.0143187	0.0136045	0.0126789	0.0141935	0.0144171	0.0140555	0.015772	0.0132821	0.0138022	0.0139608	0.0154068	0.0133273	0.0137721	0.0123758	0.0136614	0.0144564	0.0143197	0.0133287	0.0122561	0.0137826	0.0134609	0.0138915	0.0133151	0.0148804
0.0143857	0.0135131	0.0124623	0.0132614	0.0131145	0.013514	0.0132678	0.0153681	0.0144416	0.0145439	0.0147286	0.0140798	0.0143168	0.0125423	0.0133486	0.0144556	0.0128608	0.0134617	0.0131933	0.0125726	0.0140562	0.0124209	0.018235	0.013625	0.0130709	0.0134533	0.0134433	0.0135279	0.0124436	0.0134323	0.0129686	0.0138367	0.0141585	0.0144424	0.013698	0.0123939	0.0135169	0.0131076	0.0132157	0.0127099	0.0150077	0.0125894	0.0131417	0.0147317	0.0121587	0.0133247	0.0144623	0.0174387	0.0141081	0.0147885
0.0142536	0.0139733	0.0130926	0.0140523	0.0135166	0.0136431	0.0134956	0.0160292	0.0152816	0.0149768	0.0148316	0.0141313	0.0145119	0.0129929	0.0141931	0.0149282	0.0142057	0.0144154	0.0137747	0.013385	0.0147014	0.0133033	0.01459	0.0141893	0.0136756	0.0139103	0.0137735	0.0138298	0.0126522	0.0143412	0.013596	0.0149698	0.0144556	0.0155334	0.0144103	0.0128869	0.0136099	0.0142189	0.0143602	0.0137504	0.0145751	0.0133962	0.0139546	0.0150435	0.0126293	0.013658	0.0154344	0.0181139	0.0149055	0.0149357
0.0140537	0.0136276	0.0126943	0.0136778	0.0130318	0.0132363	0.0129409	0.0156217	0.0150642	0.0143692	0.0145054	0.0139507	0.0142486	0.0125165	0.0140074	0.014567	0.0135508	0.0142237	0.0132526	0.0128743	0.0143602	0.0129204	0.015127	0.0137786	0.0132568	0.0137758	0.0136057	0.0133217	0.0123161	0.0138987	0.0130901	0.0145682	0.0141166	0.0151933	0.0138966	0.012586	0.0132521	0.0138962	0.0139256	0.0131716	0.0141838	0.0129278	0.0133622	0.0148723	0.0124084	0.0132573	0.015091	0.0175135	0.0149819	0.0144209
0.014098	0.0149854	0.0139932	0.0147186	0.013761	0.0136674	0.0139506	0.0150722	0.0145719	0.0143383	0.0143243	0.0136622	0.0140209	0.0131201	0.0137346	0.0142673	0.0137955	0.0137696	0.0137963	0.0139493	0.01421	0.0138843	0.0151222	0.0137417	0.0139844	0.0137535	0.0135874	0.0135446	0.0124222	0.0144188	0.0142746	0.0149227	0.0144404	0.0147574	0.0143034	0.0129772	0.0137909	0.013496	0.0144943	0.0127683	0.0141384	0.0137355	0.014368	0.0145629	0.0146995	0.0136476	0.0145772	0.0165029	0.0146398	0.0142098
0.0142073	0.0140525	0.0130536	0.0138076	0.0132089	0.0136611	0.0132417	0.0159274	0.0151454	0.0147936	0.0146662	0.0140705	0.0144801	0.0126652	0.0135168	0.014321	0.0133791	0.0137821	0.0134692	0.0129828	0.0143528	0.0129172	0.0156282	0.0139122	0.0133803	0.0138851	0.0134901	0.0133729	0.0122105	0.0139257	0.013222	0.0144448	0.0140324	0.0153068	0.01402	0.0126688	0.013678	0.0136477	0.0138948	0.0133991	0.014613	0.0131732	0.0134998	0.0153019	0.0123128	0.0132851	0.0153471	0.0175957	0.0149207	0.0147759
0.0152761	0.0139209	0.0143908	0.0144229	0.0136758	0.0136373	0.0144177	0.0151163	0.0143117	0.0147136	0.0138391	0.014084	0.013834	0.0131383	0.0132897	0.0143864	0.0137404	0.0136593	0.0137566	0.0136534	0.0139804	0.0137853	0.0165566	0.0131736	0.0138642	0.0139507	0.0148142	0.0131614	0.012039	0.0142827	0.0141217	0.0148526	0.0149789	0.0142031	0.0138712	0.0127421	0.0136818	0.0132782	0.0143276	0.0132156	0.0143776	0.0140718	0.0136707	0.0144655	0.0121448	0.0136252	0.0142084	0.0166832	0.0144663	0.0142425
0.0148871	0.0142559	0.0134649	0.0155099	0.0141827	0.0135971	0.0135858	0.0157578	0.0154942	0.0147313	0.0149085	0.0147301	0.014945	0.0132699	0.0144732	0.01805	0.0145499	0.0174055	0.014306	0.0136444	0.0150633	0.0137123	0.0126143	0.0190914	0.0139305	0.0147139	0.0144121	0.0140999	0.0145357	0.014618	0.0140052	0.0155519	0.0154231	0.0154565	0.0150504	0.0140111	0.0149388	0.0227383	0.0147787	0.0138456	0.0139542	0.0144503	0.0142629	0.0140045	0.0173059	0.0148122	0.0151455	0.0180458	0.0137138	0.014095
0.0131551	0.0147781	0.013817	0.0139488	0.0135061	0.0137474	0.0141948	0.0138735	0.0134087	0.0141893	0.0133397	0.0132486	0.0131595	0.0131802	0.0126541	0.0135823	0.013919	0.0130377	0.013384	0.0143413	0.0137264	0.0132853	0.0166255	0.0128076	0.0140632	0.0132359	0.0146774	0.013235	0.0118943	0.013794	0.013838	0.0137941	0.0138629	0.0136251	0.0139578	0.0132895	0.01415	0.0124947	0.0138687	0.0119478	0.0138192	0.0132362	0.0146645	0.0140932	0.0122468	0.0132495	0.0133867	0.0150333	0.0134016	0.0146112
0.013323	0.014137	0.0140855	0.0145313	0.0139845	0.0136294	0.0138778	0.0147371	0.0141868	0.0141067	0.0136962	0.013454	0.013686	0.0135022	0.0132259	0.0142939	0.013929	0.0142583	0.0139219	0.0139802	0.0140988	0.0144582	0.0127861	0.0135552	0.0140644	0.0138966	0.0140724	0.0138345	0.0126747	0.0149245	0.0148982	0.0158693	0.0149733	0.0144531	0.0142478	0.0132977	0.0134112	0.0133907	0.0152825	0.0129763	0.0138352	0.0145963	0.0144592	0.0140081	0.0133025	0.0136137	0.0141538	0.0163835	0.0142307	0.0137113
0.0133669	0.0140632	0.0133961	0.0140961	0.0142526	0.0139247	0.0143385	0.0145347	0.0141233	0.014018	0.0135794	0.0134889	0.0135501	0.0135542	0.01357	0.0151013	0.0141104	0.0142803	0.0141756	0.0145071	0.014256	0.0139516	0.0122985	0.0136811	0.0141192	0.0139753	0.013865	0.0139197	0.0130845	0.014675	0.0142074	0.0150911	0.0147727	0.0140704	0.0147049	0.013411	0.0136559	0.0134646	0.014507	0.0124484	0.0136381	0.0139629	0.014072	0.0136581	0.0135822	0.0142593	0.0139855	0.0159869	0.0139011	0.013531
0.0134863	0.0136329	0.013639	0.0144971	0.0135135	0.0131535	0.013467	0.0147423	0.0141716	0.0140807	0.0135364	0.0132166	0.0136785	0.0127843	0.0131304	0.0138022	0.0134456	0.0133935	0.013577	0.0133621	0.0138463	0.0136758	0.0153899	0.0131836	0.0135005	0.0136016	0.0137627	0.0131778	0.0122833	0.014556	0.0146353	0.0151706	0.0146651	0.0143259	0.0139762	0.0126959	0.0133215	0.0131352	0.0148104	0.0125446	0.0136573	0.0142791	0.0137332	0.0141773	0.0120045	0.0134529	0.0141936	0.0164087	0.0147589	0.0138211
0.0130373	0.0130664	0.0129061	0.0191281	0.0130369	0.0129981	0.013029	0.0149193	0.0150491	0.0132336	0.0133175	0.0131918	0.0132737	0.0122769	0.0126334	0.0146546	0.012979	0.0127643	0.012833	0.0127472	0.0132807	0.0127748	0.0128542	0.0128671	0.0130374	0.0131961	0.0130005	0.0128335	0.0121884	0.0132715	0.0132922	0.0145788	0.0145678	0.0150498	0.014382	0.0121731	0.0130113	0.0126242	0.0133148	0.0126138	0.0133073	0.0163652	0.0131138	0.0134173	0.0128622	0.0126944	0.0150645	0.0149568	0.0132129	0.0132368
0.0125972	0.0142292	0.015303	0.0146149	0.0136332	0.0132185	0.014299	0.0139289	0.0133657	0.0132968	0.013002	0.0127129	0.0129092	0.0129537	0.013306	0.0138372	0.0135746	0.0130843	0.0133349	0.0135621	0.0133587	0.0146112	0.0131829	0.0129411	0.0136646	0.0130836	0.0135959	0.0131338	0.0118265	0.0144033	0.0152255	0.0150972	0.0143504	0.0133891	0.0136913	0.0128211	0.013557	0.0130444	0.0151934	0.0125738	0.0133082	0.0153717	0.0138714	0.0130191	0.0151848	0.0133145	0.0134273	0.014648	0.0137931	0.0135775
0.014035	0.0138002	0.0133052	0.0140497	0.0136114	0.0137006	0.0138494	0.0155414	0.0147772	0.0147779	0.0144597	0.0138224	0.0142857	0.0130339	0.014031	0.0145058	0.0135038	0.0140779	0.013667	0.0134155	0.0144031	0.0134431	0.0147176	0.0137815	0.0136804	0.0140167	0.0136655	0.0136727	0.0127774	0.0141572	0.0138919	0.0145612	0.0144941	0.0148895	0.0142813	0.0129548	0.0137056	0.0137794	0.0140545	0.0130697	0.0144463	0.0134304	0.0137919	0.0150107	0.0124574	0.0137475	0.0149662	0.0167758	0.014237	0.0174232
0.014498	0.0136972	0.0133746	0.0139221	0.0134919	0.0138723	0.0136132	0.0164951	0.0155322	0.0150243	0.0148464	0.014421	0.0146959	0.0130133	0.0144251	0.0149251	0.0136613	0.0143077	0.0139248	0.0134942	0.0147391	0.0134017	0.0142096	0.014553	0.0138028	0.0143178	0.013773	0.0135754	0.0128466	0.0142768	0.0135073	0.0148606	0.0145235	0.0154557	0.0142825	0.0129774	0.0136292	0.0146397	0.0141005	0.013736	0.0148402	0.0135106	0.0141121	0.0151602	0.0128616	0.0138762	0.0154019	0.0182367	0.0146717	0.0148243
0.0135146	0.0148892	0.0147095	0.0153663	0.0136461	0.0140181	0.0143745	0.0136621	0.0133287	0.0132049	0.0130428	0.0124895	0.0127849	0.0133177	0.014758	0.013809	0.0144066	0.0134107	0.0138447	0.0143112	0.0138027	0.0150454	0.0121637	0.013223	0.014315	0.0138759	0.0132028	0.0141809	0.011812	0.013971	0.0145955	0.014161	0.0137881	0.0138065	0.013566	0.0133592	0.014161	0.0139283	0.0142778	0.0122042	0.0141779	0.0140491	0.0147352	0.0130344	0.0227215	0.0133956	0.0136664	0.0147199	0.0135946	0.0142375
0.0138495	0.0155484	0.0147499	0.0142054	0.0144718	0.0148047	0.0159213	0.0147296	0.0142998	0.0139025	0.0134856	0.0132351	0.0131807	0.0135394	0.0128941	0.0138352	0.0139252	0.0131625	0.0137269	0.0148002	0.0140518	0.0144219	0.0153052	0.013646	0.0141158	0.0140555	0.0138125	0.0138016	0.0130548	0.0145188	0.0144623	0.0140927	0.0143268	0.0138217	0.0142301	0.0139376	0.0162588	0.0131001	0.0137814	0.0128808	0.0143118	0.0140345	0.0144465	0.01381	0.0122595	0.0140574	0.0137378	0.0158117	0.0135276	0.0146413
0.0141283	0.0138073	0.0136918	0.0140741	0.0141719	0.0143371	0.0141385	0.016864	0.0159578	0.0148063	0.0149867	0.0143479	0.0147066	0.0134344	0.014199	0.0149848	0.0137788	0.0142618	0.0138123	0.0137971	0.0150913	0.0134925	0.0142615	0.0141128	0.0141572	0.0145061	0.0140679	0.0140111	0.0131063	0.0144285	0.0138817	0.0149466	0.014756	0.0152929	0.0146694	0.0134032	0.014066	0.014263	0.014268	0.0133147	0.0151433	0.0136715	0.0142495	0.0152771	0.0133019	0.0141448	0.0153124	0.0185512	0.0146569	0.0152267
0.0132644	0.0138419	0.0136983	0.0135924	0.0148633	0.0140604	0.0141728	0.0143463	0.0140434	0.0134636	0.0134853	0.0134671	0.0136241	0.0139763	0.0133267	0.0153781	0.0140151	0.0145122	0.0142827	0.0146403	0.0141561	0.0144165	0.0123589	0.0141425	0.0145095	0.0140187	0.0139367	0.0140808	0.0134876	0.0140539	0.013812	0.0145085	0.0145429	0.0139711	0.0151914	0.0142046	0.0136219	0.0140597	0.0138638	0.0125136	0.0134736	0.0134756	0.0137605	0.0136298	0.0135649	0.0183253	0.0138883	0.0157956	0.0133491	0.0133064
0.0129859	0.0140568	0.0123388	0.0129756	0.0130484	0.0126318	0.0127536	0.0136706	0.0134211	0.0128096	0.0135193	0.0130931	0.0134859	0.0127532	0.0130152	0.0168785	0.0141013	0.0152024	0.0128319	0.013019	0.0133704	0.0128867	0.0116275	0.0139459	0.0128397	0.0131454	0.0126762	0.0128077	0.0121331	0.0130639	0.0127327	0.0135196	0.0135002	0.0134391	0.0134361	0.0128079	0.0149133	0.0141923	0.0133301	0.0119128	0.0128108	0.0126965	0.0129872	0.0127969	0.0210161	0.0136162	0.0132574	0.0154882	0.012727	0.0127705
0.0145089	0.0134721	0.013677	0.0131452	0.0130468	0.013654	0.0136175	0.01521	0.0149494	0.0143803	0.0149965	0.0144471	0.0148213	0.012578	0.0134462	0.0142699	0.0132605	0.0134841	0.0130307	0.0128306	0.0139141	0.0125679	0.0163107	0.0134503	0.0130326	0.013414	0.0139311	0.0131237	0.0121456	0.013377	0.0128121	0.0137094	0.0137799	0.014401	0.0136004	0.0124148	0.0135254	0.0132053	0.0131675	0.0139912	0.0140915	0.012734	0.0135647	0.0149562	0.012394	0.0133801	0.0142812	0.0161239	0.0135949	0.0144922
0.0147994	0.014163	0.0134176	0.0139831	0.0136555	0.0140166	0.0137843	0.016216	0.0159236	0.0149156	0.0152059	0.0145984	0.0148425	0.0132213	0.0144077	0.0149332	0.0137904	0.0141212	0.0137332	0.0137425	0.0149314	0.0131496	0.0149254	0.0140011	0.013854	0.0140424	0.0140034	0.0138397	0.0129387	0.0142461	0.0135725	0.0147951	0.0144193	0.0153966	0.0145791	0.0130204	0.013827	0.0138602	0.0140431	0.0132782	0.0147343	0.013265	0.0140617	0.0153649	0.0126239	0.0139439	0.0152671	0.0184862	0.0146597	0.0150765
0.0142934	0.0138035	0.0130561	0.0132161	0.0131566	0.0135383	0.013916	0.0152901	0.014579	0.013973	0.0142415	0.0140642	0.0141592	0.0127597	0.0130743	0.0140159	0.0131765	0.013323	0.0132572	0.0131055	0.0144821	0.0125861	0.0199542	0.013615	0.0136577	0.0138563	0.0144248	0.0132543	0.0128328	0.0136395	0.0134685	0.0139411	0.0135609	0.0145012	0.0135878	0.0123227	0.0135136	0.0134246	0.0135222	0.012256	0.0149513	0.0132799	0.0134507	0.015871	0.0122871	0.0135397	0.0142977	0.015581	0.0139686	0.0151528
0.0133098	0.0135916	0.0129911	0.0130902	0.0128717	0.0127717	0.012936	0.0140124	0.0138634	0.0130622	0.0133177	0.0133867	0.013499	0.012724	0.0132343	0.0150707	0.0131799	0.0140497	0.0130669	0.0127482	0.0136445	0.0125884	0.0117425	0.0165408	0.0129725	0.0136259	0.0129232	0.0127254	0.0126612	0.0131022	0.0127571	0.0135916	0.0134846	0.0135785	0.0132557	0.0127257	0.0140141	0.0183151	0.0131114	0.0122953	0.0126119	0.0125858	0.0128952	0.013338	0.0200317	0.0129896	0.0136432	0.0158294	0.0126323	0.0131485
0.0132145	0.0147147	0.0127862	0.0145196	0.0133795	0.0135323	0.0142368	0.0139071	0.013596	0.0136718	0.0130037	0.0129369	0.0129791	0.0133534	0.0129358	0.0150799	0.0133817	0.0158065	0.0133669	0.0136976	0.0142123	0.013668	0.0121514	0.0138494	0.0134641	0.0135194	0.0137503	0.0132512	0.012265	0.0139944	0.013669	0.014202	0.0142568	0.0140205	0.014018	0.0126168	0.0135218	0.0135009	0.0138296	0.0121002	0.0129027	0.0137596	0.0139684	0.0131996	0.0128324	0.013819	0.0137917	0.0158938	0.0136812	0.0130795
0.0129378	0.0148545	0.0142966	0.0148385	0.014022	0.0135152	0.0140204	0.0143758	0.0139042	0.0135285	0.013151	0.0130751	0.0131904	0.0131044	0.0131795	0.0140786	0.0137974	0.0139845	0.0137199	0.0140273	0.0136413	0.0141886	0.0135683	0.0135363	0.0139401	0.013904	0.0136082	0.0133728	0.0123734	0.0145565	0.0147717	0.0150689	0.014743	0.0137415	0.0141442	0.013081	0.0136136	0.013194	0.0146387	0.0123835	0.0136971	0.0147652	0.0140063	0.0134431	0.0125685	0.0135753	0.0137642	0.0157364	0.0135577	0.0135635
0.0144596	0.0141366	0.0135746	0.0143053	0.0142319	0.014226	0.0140348	0.0167151	0.0159771	0.0158147	0.0156419	0.014959	0.0151212	0.0136454	0.0146913	0.0154249	0.0140151	0.0148521	0.0143354	0.0138996	0.0151314	0.0135263	0.0139893	0.0145532	0.0143773	0.0145449	0.0145344	0.0143015	0.0132961	0.014683	0.0139719	0.0153059	0.0151192	0.0158151	0.0151113	0.0133163	0.0143313	0.0144812	0.0145319	0.0141983	0.0152084	0.0138804	0.0144077	0.01579	0.0149308	0.0142297	0.0156712	0.019847	0.0149539	0.0155261
0.0142448	0.0144952	0.0140563	0.0144515	0.0135342	0.0138015	0.0144849	0.0158283	0.0148465	0.0144783	0.0143976	0.0136651	0.0138531	0.0128529	0.0136597	0.0141053	0.0134711	0.0135883	0.0135227	0.0133029	0.0141767	0.0132261	0.016257	0.0133767	0.0135998	0.0138472	0.0135284	0.0134051	0.012409	0.0139458	0.0138579	0.0143119	0.0140735	0.0144925	0.0137777	0.0127677	0.0143002	0.0133118	0.0138266	0.0132737	0.0149923	0.0135355	0.0139673	0.0150305	0.0122665	0.0134979	0.0147951	0.0170478	0.0144581	0.0153377
0.0136602	0.0132391	0.0134739	0.0130365	0.0165855	0.0141976	0.0140255	0.0158754	0.0152754	0.0145871	0.0145407	0.0141788	0.0146256	0.014718	0.0155271	0.0152279	0.0137699	0.0139381	0.0144473	0.0152231	0.014977	0.0145495	0.0119446	0.0143176	0.0147869	0.0145401	0.0142481	0.0168913	0.014834	0.0141927	0.0134372	0.0143739	0.014804	0.0145521	0.0167375	0.0146242	0.013501	0.0136393	0.0136892	0.0135186	0.0139081	0.0129973	0.0137583	0.0143779	0.0123045	0.0158121	0.0145456	0.0239626	0.0133297	0.0143056
0.0135065	0.0140051	0.0134466	0.0135943	0.0147301	0.0140189	0.0142031	0.0144086	0.0141573	0.0136117	0.0135952	0.0135796	0.0135935	0.0139214	0.0132045	0.0147063	0.0140594	0.0139009	0.0142169	0.014723	0.0143001	0.0145159	0.012562	0.0136251	0.0146569	0.0141298	0.0141032	0.0144354	0.0133627	0.0141455	0.0136799	0.0144393	0.0142202	0.0140706	0.0150805	0.0139284	0.0136236	0.0133891	0.0137933	0.012385	0.0135898	0.0135536	0.0138564	0.013906	0.0138847	0.0145789	0.0139771	0.0155675	0.0134512	0.0135008
0.0130365	0.014131	0.0139135	0.0141768	0.0136773	0.0136046	0.0141733	0.0143601	0.0137641	0.0135817	0.0134164	0.0129669	0.0132148	0.013165	0.0136108	0.0141117	0.0135647	0.0136019	0.0134717	0.0134573	0.0136908	0.0143219	0.0128761	0.0134596	0.0138653	0.0134634	0.0138405	0.0131985	0.012347	0.0143455	0.0144269	0.0150434	0.0146973	0.0137198	0.0138352	0.0127538	0.0138427	0.0138384	0.0155417	0.0128909	0.0138471	0.0144393	0.0137552	0.0136768	0.0123811	0.0133849	0.0137541	0.0155409	0.0135815	0.014142
0.0133799	0.0145615	0.0131164	0.0149053	0.0134354	0.0133175	0.0137097	0.0145653	0.0137855	0.0138074	0.0132322	0.0129271	0.0129747	0.0128571	0.0128687	0.0136437	0.0136157	0.0132338	0.0133168	0.0133377	0.0137843	0.0131835	0.0141293	0.0131991	0.0135397	0.013373	0.013092	0.0130951	0.0119166	0.0143371	0.0138942	0.0148946	0.014213	0.0141137	0.0138391	0.0125724	0.0131663	0.0128141	0.014541	0.0124804	0.0138159	0.0138104	0.0135831	0.0142615	0.0119359	0.013269	0.0142164	0.015738	0.0161281	0.0141251
[truncated: 284 more columns]
