# Supplementary material for: FCMDAP: using miRNA family and cluster information to improve the prediction accuracy of disease related miRNAs
Source: BMC Syst Biol. 2019 Apr 5;13(Suppl 2):26. doi: 10.1186/s12918-019-0696-9 (PMC6449885; doi:10.1186/s12918-019-0696-9)
Supplement: Supplementary file 3 — Integrated miRNA similarity. (XLSX 1850 kb) [file 12918_2019_696_MOESM3_ESM.xlsx]

## Sheet: Sheet1
1	0.0287051	0.0313402	0.0255169	0.0256754	0.0313126	0.024333	0.0196881	0.0219099	0.021437	0.0207019	0.0217792	0	0.017654	0.0195104	0.0207097	0.0194287	0.0222692	0.0206769	0	0.0203486	0	0	0	0	0	0.0197413	0.0200577	0.0203862	0.0202829	0.0216436	0	0	0	0.0188542	0.025312	0.0176702	0	0	0.0273931	0.0188081	0.0203839	0.0197072	0	0.0215573	0.0236959	0.0186326	0.0177753	0	0.0274076
0.0287051	1	0.0326586	0.0283984	0.0277815	0.027855	0.0233778	0.0220273	0.0299744	0.0245981	0.023595	0.0261249	0	0.0180594	0.0229434	0.0232153	0.024533	0.0255253	0.0232546	0	0.0233195	0	0	0	0	0	0.0221024	0.0284274	0.0260085	0.0208814	0.0264823	0	0	0	0.0207759	0.0313099	0.0177109	0	0	0.0171765	0.0230766	0.0310527	0.021085	0	0.0238787	0.0248731	0.0190738	0.0199558	0	0.0276085
0.0313402	0.0326586	1	0.0236126	0.0238058	0.0282716	0.0217473	0.0252763	0.0214019	0.0210019	0.0200635	0.0211465	0	0.0173722	0.0202348	0.0200263	0.0191256	0.0204786	0.0195673	0	0.0197807	0	0	0	0	0	0.019037	0.0201497	0.0196236	0.0176837	0.0216336	0	0	0	0.0190576	0.0231803	0.0158918	0	0	0.017047	0.0193956	0.0212217	0.0194976	0	0.0197666	0.0220194	0.0174999	0.01781	0	0.0211906
0.0255169	0.0283984	0.0236126	1	0.0206905	0.0238881	0.022275	0.02123	0.0217479	0.0206336	0.0206933	0.0229537	0	0.0176715	0.0188616	0.0205658	0.0184264	0.0202171	0.0186427	0	0.0184176	0	0	0	0	0	0.0192291	0.0189051	0.020536	0.0190559	0.0208948	0	0	0	0.0182952	0.0231543	0.0176012	0	0	0.016354	0.0198475	0.0200093	0.0184932	0	0.0189561	0.020355	0.0181326	0.0176512	0	0.0197159
0.0256754	0.0277815	0.0238058	0.0206905	1	0.0240486	0.0231934	0.0265967	0.0235566	0.0222834	0.0212407	0.0230557	0	0.0193483	0.0210967	0.0211797	0.0190788	0.0218032	0.0206108	0	0.0207081	0	0	0	0	0	0.0200366	0.020224	0.0248971	0.0214756	0.0204337	0	0	0	0.019195	0.0243576	0.0185967	0	0	0.0166858	0.0196854	0.025177	0.0191009	0	0.0205075	0.0214695	0.0190611	0.0180089	0	0.0201613
0.0313126	0.027855	0.0282716	0.0238881	0.0240486	1	0.0259878	0.0313988	0.021171	0.0191444	0.0190059	0.0205848	0	0.0184662	0.0200043	0.0187852	0.0177428	0.0192263	0.0189114	0	0.0190018	0	0	0	0	0	0.0188321	0.0190631	0.0188603	0.0182534	0.0201163	0	0	0	0.0181288	0.0216546	0.0160185	0	0	0.0169172	0.0184452	0.020262	0.0191752	0	0.0196064	0.021043	0.0175642	0.0167222	0	0.0296865
0.024333	0.0233778	0.0217473	0.022275	0.0231934	0.0259878	1	0.0232314	0.0203555	0.0199929	0.0190303	0.0199742	0	0.0173821	0.0190203	0.0223866	0.0176797	0.0196824	0.0189865	0	0.0196042	0	0	0	0	0	0.019547	0.0194653	0.0187757	0.0182338	0.0195796	0	0	0	0.0180011	0.0196081	0.0173395	0	0	0.0184545	0.0173486	0.0202069	0.0179451	0	0.0197937	0.0209112	0.0183893	0.0166157	0	0.0193581
0.0196881	0.0220273	0.0252763	0.02123	0.0265967	0.0313988	0.0232314	1	0.0264738	0.0181363	0.0192336	0.0199031	0	0.024536	0.0185745	0.0183408	0.0177285	0.0184752	0.0177076	0	0.0187404	0	0	0	0	0	0.0263672	0.0183714	0.0183425	0.0230219	0.0188407	0	0	0	0.0191328	0.0234318	0.0234907	0	0	0.0137045	0.0155733	0.0223837	0.0198375	0	0.0184994	0.0189951	0.0183928	0.0176537	0	0.0200623
0.0219099	0.0299744	0.0214019	0.0217479	0.0235566	0.021171	0.0203555	0.0264738	1	0.0212586	0.0241692	0.0245159	0	0.0216804	0.0205287	0.0240775	0.0202741	0.0244223	0.0218665	0	0.0250812	0	0	0	0	0	0.0269084	0.0286304	0.0200946	0.0222416	0.0237649	0	0	0	0.0298332	0.0405216	0.0198124	0	0	0.0167663	0.0252345	0.031958	0.0219031	0	0.0241258	0.0260154	0.0270298	0.0197376	0	0.0230882
0.021437	0.0245981	0.0210019	0.0206336	0.0222834	0.0191444	0.0199929	0.0181363	0.0212586	1	0.0219458	0.0229951	0	0.0165843	0.019915	0.0201511	0.0201556	0.0223419	0.0200242	0	0.0210235	0	0	0	0	0	0.0203731	0.0200508	0.0189845	0.0207672	0.0207657	0	0	0	0.0190845	0.0236143	0.0187681	0	0	0.0175655	0.0199461	0.0200952	0.0187375	0	0.0197965	0.0204918	0.0179358	0.0189449	0	0.0192148
0.0207019	0.023595	0.0200635	0.0206933	0.0212407	0.0190059	0.0190303	0.0192336	0.0241692	0.0219458	1	0.0238418	0	0.0198774	0.0200366	0.021163	0.0192439	0.0208136	0.0198729	0	0.0189984	0	0	0	0	0	0.0212588	0.0199674	0.0207021	0.0223495	0.0199282	0	0	0	0.0191003	0.0261643	0.0228071	0	0	0.0168516	0.0200997	0.0200124	0.0205377	0	0.0191317	0.0200496	0.0196891	0.0177896	0	0.0201872
0.0217792	0.0261249	0.0211465	0.0229537	0.0230557	0.0205848	0.0199742	0.0199031	0.0245159	0.0229951	0.0238418	1	0	0.0183518	0.0223944	0.0219224	0.027546	0.0246711	0.0240006	0	0.0206863	0	0	0	0	0	0.0218866	0.0224102	0.0212785	0.0215751	0.0214566	0	0	0	0.0223759	0.0302081	0.0194014	0	0	0.0164419	0.0328778	0.022046	0.0191032	0	0.0215962	0.0223822	0.0219255	0.0241679	0	0.0205722
0	0	0	0	0	0	0	0	0	0	0	0	1	0	0	0	0	0	0	0	0	0	0	0	0	0	0	0	0	0	0	0	0	0	0	0	0	0	0	0	0	0	0	0	0	0	0	0	0	0
0.017654	0.0180594	0.0173722	0.0176715	0.0193483	0.0184662	0.0173821	0.024536	0.0216804	0.0165843	0.0198774	0.0183518	0	1	0.0198615	0.054497	0.0164915	0.0171295	0.016603	0	0.0163861	0	0	0	0	0	0.020095	0.0168562	0.015429	0.0153263	0.0169607	0	0	0	0.0176881	0.0224684	0.0353052	0	0	0.0124805	0.0138184	0.0204186	0.021277	0	0.0193204	0.0183115	0.0230319	0.0131049	0	0.0184427
0.0195104	0.0229434	0.0202348	0.0188616	0.0210967	0.0200043	0.0190203	0.0185745	0.0205287	0.019915	0.0200366	0.0223944	0	0.0198615	1	0.0229928	0.0194212	0.0200973	0.0195408	0	0.0191559	0	0	0	0	0	0.017524	0.0197059	0.0189135	0.0178134	0.0199857	0	0	0	0.0198835	0.0224458	0.0171383	0	0	0.014922	0.0187967	0.0211602	0.0257806	0	0.0193492	0.0207219	0.0185501	0.0182674	0	0.0185336
0.0207097	0.0232153	0.0200263	0.0205658	0.0211797	0.0187852	0.0223866	0.0183408	0.0240775	0.0201511	0.021163	0.0219224	0	0.054497	0.0229928	1	0.0191898	0.0203707	0.0199208	0	0.0190062	0	0	0	0	0	0.0201668	0.0211816	0.0182932	0.0192745	0.0202804	0	0	0	0.0193309	0.0234949	0.0185059	0	0	0.0160714	0.0183937	0.0271525	0.0206608	0	0.0215339	0.0210619	0.0193743	0.0178463	0	0.0188898
0.0194287	0.024533	0.0191256	0.0184264	0.0190788	0.0177428	0.0176797	0.0177285	0.0202741	0.0201556	0.0192439	0.027546	0	0.0164915	0.0194212	0.0191898	1	0.0193182	0.0192199	0	0.0188176	0	0	0	0	0	0.0174312	0.0182163	0.0204636	0.0190057	0.019826	0	0	0	0.019389	0.0243892	0.0166976	0	0	0.0149576	0.0221041	0.0213538	0.016788	0	0.0192039	0.0190577	0.0173437	0.0187767	0	0.0181357
0.0222692	0.0255253	0.0204786	0.0202171	0.0218032	0.0192263	0.0196824	0.0184752	0.0244223	0.0223419	0.0208136	0.0246711	0	0.0171295	0.0200973	0.0203707	0.0193182	1	0.0382678	0	0.0199369	0	0	0	0	0	0.0206899	0.020079	0.0199084	0.020702	0.0222256	0	0	0	0.0204917	0.0257056	0.0187151	0	0	0.017478	0.0221653	0.0205652	0.0186633	0	0.0284478	0.0246375	0.0193598	0.0191867	0	0.0199873
0.0206769	0.0232546	0.0195673	0.0186427	0.0206108	0.0189114	0.0189865	0.0177076	0.0218665	0.0200242	0.0198729	0.0240006	0	0.016603	0.0195408	0.0199208	0.0192199	0.0382678	1	0	0.0192189	0	0	0	0	0	0.0195212	0.0190175	0.0199609	0.0184373	0.0207355	0	0	0	0.0220829	0.0249182	0.0161513	0	0	0.0172132	0.0234496	0.0203809	0.0184867	0	0.0232789	0.0225378	0.0176999	0.0189547	0	0.0194318
0	0	0	0	0	0	0	0	0	0	0	0	0	0	0	0	0	0	0	1	0	0	0	0	0	0	0	0	0	0	0	0	0	0	0	0	0	0	0	0	0	0	0	0	0	0	0	0	0	0
0.0203486	0.0233195	0.0197807	0.0184176	0.0207081	0.0190018	0.0196042	0.0187404	0.0250812	0.0210235	0.0189984	0.0206863	0	0.0163861	0.0191559	0.0190062	0.0188176	0.0199369	0.0192189	0	1	0	0	0	0	0	0.0185969	0.01972	0.020829	0.0184859	0.0199408	0	0	0	0.0200843	0.0219484	0.0152975	0	0	0.018025	0.0214695	0.0220342	0.017908	0	0.018595	0.0203757	0.0173884	0.0189045	0	0.019434
0	0	0	0	0	0	0	0	0	0	0	0	0	0	0	0	0	0	0	0	0	1	0	0	0	0	0	0	0	0	0	0	0	0	0	0	0	0	0	0	0	0	0	0	0	0	0	0	0	0
0	0	0	0	0	0	0	0	0	0	0	0	0	0	0	0	0	0	0	0	0	0	1	0	0	0	0	0	0	0	0	0	0	0	0	0	0	0	0	0	0	0	0	0	0	0	0	0	0	0
0	0	0	0	0	0	0	0	0	0	0	0	0	0	0	0	0	0	0	0	0	0	0	1	0	0	0	0	0	0	0	0	0	0	0	0	0	0	0	0	0	0	0	0	0	0	0	0	0	0
0	0	0	0	0	0	0	0	0	0	0	0	0	0	0	0	0	0	0	0	0	0	0	0	1	0	0	0	0	0	0	0	0	0	0	0	0	0	0	0	0	0	0	0	0	0	0	0	0	0
0	0	0	0	0	0	0	0	0	0	0	0	0	0	0	0	0	0	0	0	0	0	0	0	0	1	0	0	0	0	0	0	0	0	0	0	0	0	0	0	0	0	0	0	0	0	0	0	0	0
0.0197413	0.0221024	0.019037	0.0192291	0.0200366	0.0188321	0.019547	0.0263672	0.0269084	0.0203731	0.0212588	0.0218866	0	0.020095	0.017524	0.0201668	0.0174312	0.0206899	0.0195212	0	0.0185969	0	0	0	0	0	1	0.0190357	0.0215767	0.0207159	0.0191909	0	0	0	0.0190669	0.0304523	0.0630239	0	0	0.0149891	0.0204529	0.0189535	0.017994	0	0.0183754	0.0198566	0.019604	0.0184378	0	0.0204762
0.0200577	0.0284274	0.0201497	0.0189051	0.020224	0.0190631	0.0194653	0.0183714	0.0286304	0.0200508	0.0199674	0.0224102	0	0.0168562	0.0197059	0.0211816	0.0182163	0.020079	0.0190175	0	0.01972	0	0	0	0	0	0.0190357	1	0.0202148	0.020282	0.0255511	0	0	0	0.0196221	0.0252581	0.015671	0	0	0.018766	0.0169153	0.020724	0.021623	0	0.0226592	0.0217484	0.0182596	0.0169127	0	0.0221055
0.0203862	0.0260085	0.0196236	0.020536	0.0248971	0.0188603	0.0187757	0.0183425	0.0200946	0.0189845	0.0207021	0.0212785	0	0.015429	0.0189135	0.0182932	0.0204636	0.0199084	0.0199609	0	0.020829	0	0	0	0	0	0.0215767	0.0202148	1	0.0196766	0.0226846	0	0	0	0.0190021	0.0243771	0.0151267	0	0	0.0166604	0.024349	0.0207833	0.0195815	0	0.0183467	0.0202406	0.0174763	0.0202389	0	0.0205284
0.0202829	0.0208814	0.0176837	0.0190559	0.0214756	0.0182534	0.0182338	0.0230219	0.0222416	0.0207672	0.0223495	0.0215751	0	0.0153263	0.0178134	0.0192745	0.0190057	0.020702	0.0184373	0	0.0184859	0	0	0	0	0	0.0207159	0.020282	0.0196766	1	0.0199125	0	0	0	0.0175219	0.0240244	0.0551863	0	0	0.0126423	0.0220052	0.0190414	0.0183044	0	0.0224849	0.0206919	0.0195655	0.0135582	0	0.0230532
0.0216436	0.0264823	0.0216336	0.0208948	0.0204337	0.0201163	0.0195796	0.0188407	0.0237649	0.0207657	0.0199282	0.0214566	0	0.0169607	0.0199857	0.0202804	0.019826	0.0222256	0.0207355	0	0.0199408	0	0	0	0	0	0.0191909	0.0255511	0.0226846	0.0199125	1	0	0	0	0.0293049	0.0262866	0.0182224	0	0	0.0159939	0.0213535	0.0214169	0.0198486	0	0.0200061	0.0221028	0.0175624	0.0199164	0	0.0198358
0	0	0	0	0	0	0	0	0	0	0	0	0	0	0	0	0	0	0	0	0	0	0	0	0	0	0	0	0	0	0	1	0	0	0	0	0	0	0	0	0	0	0	0	0	0	0	0	0	0
0	0	0	0	0	0	0	0	0	0	0	0	0	0	0	0	0	0	0	0	0	0	0	0	0	0	0	0	0	0	0	0	1	0	0	0	0	0	0	0	0	0	0	0	0	0	0	0	0	0
0	0	0	0	0	0	0	0	0	0	0	0	0	0	0	0	0	0	0	0	0	0	0	0	0	0	0	0	0	0	0	0	0	1	0	0	0	0	0	0	0	0	0	0	0	0	0	0	0	0
0.0188542	0.0207759	0.0190576	0.0182952	0.019195	0.0181288	0.0180011	0.0191328	0.0298332	0.0190845	0.0191003	0.0223759	0	0.0176881	0.0198835	0.0193309	0.019389	0.0204917	0.0220829	0	0.0200843	0	0	0	0	0	0.0190669	0.0196221	0.0190021	0.0175219	0.0293049	0	0	0	1	0.028937	0.0162392	0	0	0.0163581	0.0223187	0.0219291	0.0187336	0	0.0215245	0.0217025	0.0185638	0.0223294	0	0.0198328
0.025312	0.0313099	0.0231803	0.0231543	0.0243576	0.0216546	0.0196081	0.0234318	0.0405216	0.0236143	0.0261643	0.0302081	0	0.0224684	0.0224458	0.0234949	0.0243892	0.0257056	0.0249182	0	0.0219484	0	0	0	0	0	0.0304523	0.0252581	0.0243771	0.0240244	0.0262866	0	0	0	0.028937	1	0.0216543	0	0	0.0163593	0.0573496	0.021409	0.0209542	0	0.0226793	0.0282374	0.0232827	0.0365889	0	0.0420083
0.0176702	0.0177109	0.0158918	0.0176012	0.0185967	0.0160185	0.0173395	0.0234907	0.0198124	0.0187681	0.0228071	0.0194014	0	0.0353052	0.0171383	0.0185059	0.0166976	0.0187151	0.0161513	0	0.0152975	0	0	0	0	0	0.0630239	0.015671	0.0151267	0.0551863	0.0182224	0	0	0	0.0162392	0.0216543	1	0	0	0.0120111	0.0137028	0.0152105	0.0141865	0	0.0200127	0.0184997	0.0165805	0.0129205	0	0.0144544
0	0	0	0	0	0	0	0	0	0	0	0	0	0	0	0	0	0	0	0	0	0	0	0	0	0	0	0	0	0	0	0	0	0	0	0	0	1	0	0	0	0	0	0	0	0	0	0	0	0
0	0	0	0	0	0	0	0	0	0	0	0	0	0	0	0	0	0	0	0	0	0	0	0	0	0	0	0	0	0	0	0	0	0	0	0	0	0	1	0	0	0	0	0	0	0	0	0	0	0
0.0273931	0.0171765	0.017047	0.016354	0.0166858	0.0169172	0.0184545	0.0137045	0.0167663	0.0175655	0.0168516	0.0164419	0	0.0124805	0.014922	0.0160714	0.0149576	0.017478	0.0172132	0	0.018025	0	0	0	0	0	0.0149891	0.018766	0.0166604	0.0126423	0.0159939	0	0	0	0.0163581	0.0163593	0.0120111	0	0	1	0.0133656	0.0140602	0.0130453	0	0.0293444	0.0286918	0.0128487	0.0182877	0	0.02443
0.0188081	0.0230766	0.0193956	0.0198475	0.0196854	0.0184452	0.0173486	0.0155733	0.0252345	0.0199461	0.0200997	0.0328778	0	0.0138184	0.0187967	0.0183937	0.0221041	0.0221653	0.0234496	0	0.0214695	0	0	0	0	0	0.0204529	0.0169153	0.024349	0.0220052	0.0213535	0	0	0	0.0223187	0.0573496	0.0137028	0	0	0.0133656	1	0.0268102	0.0147939	0	0.0186425	0.0204923	0.0195557	0.0312275	0	0.0246545
0.0203839	0.0310527	0.0212217	0.0200093	0.025177	0.020262	0.0202069	0.0223837	0.031958	0.0200952	0.0200124	0.022046	0	0.0204186	0.0211602	0.0271525	0.0213538	0.0205652	0.0203809	0	0.0220342	0	0	0	0	0	0.0189535	0.020724	0.0207833	0.0190414	0.0214169	0	0	0	0.0219291	0.021409	0.0152105	0	0	0.0140602	0.0268102	1	0.0182157	0	0.0198929	0.0205478	0.0180031	0.0197915	0	0.0190897
0.0197072	0.021085	0.0194976	0.0184932	0.0191009	0.0191752	0.0179451	0.0198375	0.0219031	0.0187375	0.0205377	0.0191032	0	0.021277	0.0257806	0.0206608	0.016788	0.0186633	0.0184867	0	0.017908	0	0	0	0	0	0.017994	0.021623	0.0195815	0.0183044	0.0198486	0	0	0	0.0187336	0.0209542	0.0141865	0	0	0.0130453	0.0147939	0.0182157	1	0	0.0190447	0.0203948	0.0216734	0.0138737	0	0.020001
0	0	0	0	0	0	0	0	0	0	0	0	0	0	0	0	0	0	0	0	0	0	0	0	0	0	0	0	0	0	0	0	0	0	0	0	0	0	0	0	0	0	0	1	0	0	0	0	0	0
0.0215573	0.0238787	0.0197666	0.0189561	0.0205075	0.0196064	0.0197937	0.0184994	0.0241258	0.0197965	0.0191317	0.0215962	0	0.0193204	0.0193492	0.0215339	0.0192039	0.0284478	0.0232789	0	0.018595	0	0	0	0	0	0.0183754	0.0226592	0.0183467	0.0224849	0.0200061	0	0	0	0.0215245	0.0226793	0.0200127	0	0	0.0293444	0.0186425	0.0198929	0.0190447	0	1	0.0293702	0.0194638	0.0172157	0	0.0202579
0.0236959	0.0248731	0.0220194	0.020355	0.0214695	0.021043	0.0209112	0.0189951	0.0260154	0.0204918	0.0200496	0.0223822	0	0.0183115	0.0207219	0.0210619	0.0190577	0.0246375	0.0225378	0	0.0203757	0	0	0	0	0	0.0198566	0.0217484	0.0202406	0.0206919	0.0221028	0	0	0	0.0217025	0.0282374	0.0184997	0	0	0.0286918	0.0204923	0.0205478	0.0203948	0	0.0293702	1	0.0186237	0.0186928	0	0.0275699
0.0186326	0.0190738	0.0174999	0.0181326	0.0190611	0.0175642	0.0183893	0.0183928	0.0270298	0.0179358	0.0196891	0.0219255	0	0.0230319	0.0185501	0.0193743	0.0173437	0.0193598	0.0176999	0	0.0173884	0	0	0	0	0	0.019604	0.0182596	0.0174763	0.0195655	0.0175624	0	0	0	0.0185638	0.0232827	0.0165805	0	0	0.0128487	0.0195557	0.0180031	0.0216734	0	0.0194638	0.0186237	1	0.0160095	0	0.0190783
0.0177753	0.0199558	0.01781	0.0176512	0.0180089	0.0167222	0.0166157	0.0176537	0.0197376	0.0189449	0.0177896	0.0241679	0	0.0131049	0.0182674	0.0178463	0.0187767	0.0191867	0.0189547	0	0.0189045	0	0	0	0	0	0.0184378	0.0169127	0.0202389	0.0135582	0.0199164	0	0	0	0.0223294	0.0365889	0.0129205	0	0	0.0182877	0.0312275	0.0197915	0.0138737	0	0.0172157	0.0186928	0.0160095	1	0	0.021048
0	0	0	0	0	0	0	0	0	0	0	0	0	0	0	0	0	0	0	0	0	0	0	0	0	0	0	0	0	0	0	0	0	0	0	0	0	0	0	0	0	0	0	0	0	0	0	0	1	0
0.0274076	0.0276085	0.0211906	0.0197159	0.0201613	0.0296865	0.0193581	0.0200623	0.0230882	0.0192148	0.0201872	0.0205722	0	0.0184427	0.0185336	0.0188898	0.0181357	0.0199873	0.0194318	0	0.019434	0	0	0	0	0	0.0204762	0.0221055	0.0205284	0.0230532	0.0198358	0	0	0	0.0198328	0.0420083	0.0144544	0	0	0.02443	0.0246545	0.0190897	0.020001	0	0.0202579	0.0275699	0.0190783	0.021048	0	1
0.0207773	0.0238267	0.0212315	0.0195422	0.0203101	0.0201269	0.0206642	0.020053	0.0248858	0.0219534	0.0250441	0.0320553	0	0.0154585	0.019586	0.0210268	0.0212762	0.0223036	0.0206158	0	0.0201001	0	0	0	0	0	0.0227295	0.0239936	0.0204238	0.0228747	0.0212914	0	0	0	0.0191923	0.0241172	0.0293889	0	0	0.0130612	0.0260519	0.0235912	0.0266195	0	0.0205398	0.0214788	0.0219033	0.019628	0	0.0235086
0	0	0	0	0	0	0	0	0	0	0	0	0	0	0	0	0	0	0	0	0	0	0	0	0	0	0	0	0	0	0	0	0	0	0	0	0	0	0	0	0	0	0	0	0	0	0	0	0	0
0	0	0	0	0	0	0	0	0	0	0	0	0	0	0	0	0	0	0	0	0	0	0	0	0	0	0	0	0	0	0	0	0	0	0	0	0	0	0	0	0	0	0	0	0	0	0	0	0	0
0	0	0	0	0	0	0	0	0	0	0	0	0	0	0	0	0	0	0	0	0	0	0	0	0	0	0	0	0	0	0	0	0	0	0	0	0	0	0	0	0	0	0	0	0	0	0	0	0	0
0.0193734	0.022299	0.0217463	0.0188155	0.0194136	0.0179308	0.0195366	0.0187902	0.0236019	0.0204158	0.0312837	0.0231945	0	0.0204811	0.0206616	0.0213557	0.0187779	0.021015	0.0189124	0	0.0181173	0	0	0	0	0	0.0267807	0.0187689	0.0179482	0.0214958	0.0204624	0	0	0	0.0204578	0.0271538	0.0586495	0	0	0.0145865	0.0191219	0.0187469	0.0187986	0	0.0199143	0.0207574	0.0193661	0.0175551	0	0.019351
0.0182768	0.0303492	0.0188662	0.0183498	0.0180251	0.0178833	0.017863	0.0168897	0.0331891	0.0173253	0.0173654	0.0196732	0	0.0138145	0.0172935	0.0174101	0.0173761	0.0194174	0.0245903	0	0.0178413	0	0	0	0	0	0.016595	0.0209042	0.0182163	0.014154	0.03108	0	0	0	0.0210506	0.0191157	0.0133625	0	0	0.017621	0.0166456	0.0196813	0.0265948	0	0.0381636	0.0249034	0.017076	0.0168668	0	0.0169985
0	0	0	0	0	0	0	0	0	0	0	0	0	0	0	0	0	0	0	0	0	0	0	0	0	0	0	0	0	0	0	0	0	0	0	0	0	0	0	0	0	0	0	0	0	0	0	0	0	0
0.0188809	0.020651	0.0194299	0.0180148	0.0190829	0.0180708	0.0182392	0.0190165	0.0196076	0.0199778	0.0224119	0.0196562	0	0.0195365	0.0197981	0.018665	0.0183762	0.0242681	0.0216545	0	0.0188638	0	0	0	0	0	0.017938	0.0182899	0.0190918	0.0224036	0.0194431	0	0	0	0.0203259	0.0200725	0.0180586	0	0	0.0166057	0.0182471	0.0202268	0.0242092	0	0.0196287	0.0213904	0.0183908	0.0199264	0	0.0194827
0	0	0	0	0	0	0	0	0	0	0	0	0	0	0	0	0	0	0	0	0	0	0	0	0	0	0	0	0	0	0	0	0	0	0	0	0	0	0	0	0	0	0	0	0	0	0	0	0	0
0.0369387	0.035605	0.0235184	0.0211283	0.0212261	0.0221824	0.02119	0.0191929	0.0185537	0.0197352	0.0192603	0.0185687	0	0.0135094	0.0181582	0.0181278	0.0201489	0.0190395	0.0191691	0	0.0205582	0	0	0	0	0	0.0170305	0.0215944	0.019937	0.0138228	0.0207415	0	0	0	0.0155391	0.0187251	0.0129071	0	0	0.0162658	0.0241096	0.0271774	0.029493	0	0.0182931	0.0191273	0.0156112	0.0165387	0	0.0182341
0.0204277	0.024409	0.0207913	0.0193429	0.0228696	0.0193487	0.0186898	0.0193644	0.0252018	0.0204052	0.0204462	0.0234758	0	0.0175499	0.0194647	0.0210485	0.0195587	0.0213994	0.0207102	0	0.0214227	0	0	0	0	0	0.019942	0.0204073	0.0200154	0.018387	0.0227988	0	0	0	0.0224615	0.0270031	0.016016	0	0	0.015779	0.02194	0.0220999	0.019818	0	0.0199515	0.021206	0.0182359	0.0208763	0	0.0193379
0.012821	0.0129532	0.0126818	0.0140663	0.0132522	0.0116573	0.0176873	0.010804	0.0133494	0.0125594	0.0138878	0.0128617	0	0.0746683	0.0163998	0.123841	0.0124578	0.0123208	0.0127422	0	0.0117753	0	0	0	0	0	0.0127918	0.0132109	0.0107931	0.0107548	0.012447	0	0	0	0.010984	0.012343	0.0109849	0	0	0.0102807	0.0105009	0.023507	0.0117395	0	0.0148182	0.0129755	0.0130478	0.0104752	0	0.0107345
0	0	0	0	0	0	0	0	0	0	0	0	0	0	0	0	0	0	0	0	0	0	0	0	0	0	0	0	0	0	0	0	0	0	0	0	0	0	0	0	0	0	0	0	0	0	0	0	0	0
0.0207717	0.0227911	0.0204467	0.0183811	0.0214671	0.0186189	0.0183012	0.0187597	0.0245358	0.0205702	0.0196235	0.0216145	0	0.0182935	0.0212593	0.0206582	0.0212488	0.0211273	0.0201048	0	0.0211414	0	0	0	0	0	0.0199868	0.0197429	0.0190767	0.0186358	0.021312	0	0	0	0.0207613	0.0276818	0.0176029	0	0	0.0293527	0.0223597	0.0244134	0.0199015	0	0.020498	0.0216638	0.0177459	0.034498	0	0.0196555
0	0	0	0	0	0	0	0	0	0	0	0	0	0	0	0	0	0	0	0	0	0	0	0	0	0	0	0	0	0	0	0	0	0	0	0	0	0	0	0	0	0	0	0	0	0	0	0	0	0
0.020343	0.0245012	0.0199445	0.0191245	0.0203721	0.0181675	0.0180663	0.0179547	0.0227382	0.0208948	0.019198	0.0237149	0	0.0152164	0.0197168	0.0187951	0.0191567	0.0205322	0.0203065	0	0.0198622	0	0	0	0	0	0.0184369	0.0189587	0.018271	0.0207474	0.0210315	0	0	0	0.0201301	0.0196816	0.0199805	0	0	0.0170861	0.0193308	0.0203144	0.0184538	0	0.0184241	0.0193227	0.0170346	0.0189857	0	0.0186368
0	0	0	0	0	0	0	0	0	0	0	0	0	0	0	0	0	0	0	0	0	0	0	0	0	0	0	0	0	0	0	0	0	0	0	0	0	0	0	0	0	0	0	0	0	0	0	0	0	0
0.0194553	0.0206982	0.0187966	0.0196446	0.0201651	0.0180774	0.0174903	0.0198507	0.0228231	0.0188314	0.0222573	0.0215915	0	0.0275941	0.0200333	0.0194336	0.0202628	0.0187923	0.0190013	0	0.018052	0	0	0	0	0	0.019429	0.0189637	0.0180672	0.0208018	0.0190172	0	0	0	0.019512	0.0313068	0.0212577	0	0	0.0164401	0.0208062	0.0192836	0.0224875	0	0.0192159	0.019751	0.0188325	0.0181616	0	0.021331
0.0207213	0.0243803	0.020461	0.0197239	0.0212131	0.019403	0.0200906	0.0212649	0.0235209	0.0201132	0.0225558	0.0256632	0	0.0270273	0.0215385	0.0218253	0.0194852	0.0211531	0.0197962	0	0.0196707	0	0	0	0	0	0.0211153	0.0213091	0.0202719	0.020038	0.0211709	0	0	0	0.019742	0.026081	0.0178075	0	0	0.0166494	0.0194546	0.0208744	0.0193887	0	0.020003	0.0220044	0.0188906	0.0174647	0	0.0215391
0.0197285	0.0200928	0.0190964	0.0182055	0.0199842	0.0176367	0.0187213	0.0185397	0.0243726	0.0205378	0.0203868	0.0217329	0	0.0223339	0.0182684	0.0213154	0.0176514	0.0225793	0.0213083	0	0.0180136	0	0	0	0	0	0.0226274	0.017784	0.0190179	0.0214442	0.018219	0	0	0	0.0190543	0.0285974	0.0229673	0	0	0.0135047	0.0189114	0.0181368	0.0200152	0	0.0196992	0.0199794	0.0218846	0.0174067	0	0.0197253
0	0	0	0	0	0	0	0	0	0	0	0	0	0	0	0	0	0	0	0	0	0	0	0	0	0	0	0	0	0	0	0	0	0	0	0	0	0	0	0	0	0	0	0	0	0	0	0	0	0
0	0	0	0	0	0	0	0	0	0	0	0	0	0	0	0	0	0	0	0	0	0	0	0	0	0	0	0	0	0	0	0	0	0	0	0	0	0	0	0	0	0	0	0	0	0	0	0	0	0
0.0197946	0.021086	0.0190827	0.0176597	0.0184616	0.0191183	0.0193373	0.0190241	0.0336341	0.0179757	0.0198054	0.0212436	0	0.0190396	0.0181118	0.020246	0.0180848	0.0193726	0.0182004	0	0.0183654	0	0	0	0	0	0.0200395	0.0195254	0.017901	0.0212485	0.0193224	0	0	0	0.0201075	0.0309128	0.0179115	0	0	0.015102	0.0224672	0.0206741	0.0175674	0	0.0199423	0.0208069	0.0308811	0.0184235	0	0.0206509
0.0179936	0.0185599	0.0165598	0.0175989	0.0180541	0.0165134	0.0165131	0.0182165	0.0305629	0.017548	0.0185619	0.018347	0	0.0166442	0.0166768	0.0171839	0.0167015	0.0189996	0.0171798	0	0.0171238	0	0	0	0	0	0.0215093	0.0177054	0.0169038	0.0252745	0.0176747	0	0	0	0.0186722	0.0327801	0.0247905	0	0	0.0132198	0.0219269	0.0184438	0.0183955	0	0.0179005	0.0189017	0.0194099	0.0175371	0	0.0207698
0.0195509	0.0260393	0.0193927	0.0188997	0.0192681	0.0189614	0.018965	0.0168568	0.0275602	0.0195512	0.0228083	0.022504	0	0.0165805	0.0242209	0.0218409	0.0248857	0.019923	0.0192777	0	0.0189177	0	0	0	0	0	0.0188689	0.0221944	0.020235	0.0198732	0.0190564	0	0	0	0.0177393	0.0218076	0.0140377	0	0	0.0287009	0.0274247	0.0212084	0.0169752	0	0.0231405	0.0257627	0.0293418	0.0188941	0	0.0225092
0.0236397	0.0243044	0.0248672	0.0200528	0.0214357	0.0268628	0.0296049	0.0240287	0.0248512	0.0192543	0.0213273	0.0271797	0	0.0408619	0.0211278	0.0199698	0.018848	0.0207269	0.0203584	0	0.0199756	0	0	0	0	0	0.0235618	0.0185836	0.020289	0.0197113	0.0199847	0	0	0	0.0218051	0.0429285	0.0159523	0	0	0.013566	0.0266229	0.0197942	0.022991	0	0.0208985	0.0209731	0.0245249	0.0205865	0	0.025894
0.0196786	0.0261817	0.0193219	0.0185336	0.0200439	0.0187943	0.0167457	0.0189137	0.0233527	0.0192475	0.0211905	0.022353	0	0.027273	0.0168948	0.0190773	0.0227498	0.0194558	0.020977	0	0.0171493	0	0	0	0	0	0.0206693	0.0234619	0.0185069	0.0281211	0.0191644	0	0	0	0.0178231	0.0309111	0.0242938	0	0	0.0126858	0.0182866	0.0173084	0.0291105	0	0.0192429	0.0202856	0.0228026	0.0148982	0	0.0230036
0.020633	0.0180393	0.0165562	0.0170731	0.0181584	0.0166154	0.0177609	0.0181015	0.0186761	0.0174583	0.0177436	0.0227279	0	0.0139358	0.0169355	0.0168731	0.0167467	0.0178475	0.0171756	0	0.0169956	0	0	0	0	0	0.0172178	0.0190209	0.017906	0.0380163	0.0176092	0	0	0	0.0160843	0.0192069	0.0307795	0	0	0.0133112	0.0198307	0.0163111	0.0157296	0	0.0183143	0.0211881	0.0173237	0.0140187	0	0.0189368
0.0201434	0.0251262	0.0192568	0.0191456	0.0192005	0.0187751	0.0185576	0.0187222	0.0280521	0.018976	0.0212545	0.0217769	0	0.0184701	0.0189267	0.0217026	0.0205541	0.0201798	0.0225903	0	0.0187074	0	0	0	0	0	0.0195433	0.0213353	0.0196724	0.016795	0.020087	0	0	0	0.0207978	0.0327677	0.0149876	0	0	0.0136436	0.0223775	0.0205273	0.0246702	0	0.0188769	0.0203446	0.0191186	0.020022	0	0.0223141
0.0195774	0.0222134	0.0197498	0.0192328	0.0203558	0.0178828	0.0182121	0.0183617	0.0250135	0.0181997	0.0211529	0.0193491	0	0.0200458	0.0182985	0.0187817	0.0181471	0.020096	0.018848	0	0.0190172	0	0	0	0	0	0.0190107	0.0195504	0.0182899	0.0185575	0.0185649	0	0	0	0.0191357	0.0295685	0.0169117	0	0	0.0159345	0.0203399	0.0189184	0.0185427	0	0.0197379	0.0198232	0.0223373	0.0188417	0	0.0208081
0.0170013	0.0173439	0.0158761	0.0222348	0.0193655	0.0161652	0.0168211	0.0170566	0.0178806	0.0198834	0.0219534	0.0173322	0	0.0171679	0.0157071	0.0166359	0.0157037	0.0169795	0.0163304	0	0.0163173	0	0	0	0	0	0.0195414	0.0160478	0.0164875	0.029964	0.0168464	0	0	0	0.0155255	0.0185885	0.0284225	0	0	0.0195246	0.0160398	0.015888	0.0189345	0	0.0174054	0.0174801	0.0172785	0.0137798	0	0.0176135
0.0192272	0.0251748	0.0214654	0.0201304	0.0198744	0.0184396	0.018443	0.0183378	0.0233562	0.0209916	0.0222837	0.0257116	0	0.0178875	0.0200014	0.0218417	0.0200132	0.0219778	0.0215713	0	0.0211957	0	0	0	0	0	0.0194593	0.0207117	0.0186672	0.0222212	0.020708	0	0	0	0.0195157	0.024473	0.0211339	0	0	0.0177689	0.0189945	0.0194924	0.0192166	0	0.0210964	0.0203333	0.0220866	0.0179262	0	0.0199049
0.015762	0.0169026	0.0153766	0.0149465	0.017189	0.0152158	0.0152404	0.0168424	0.0198072	0.0157321	0.0180905	0.0178418	0	0.0182115	0.0160653	0.018181	0.015705	0.01674	0.0162741	0	0.0154217	0	0	0	0	0	0.0166272	0.0165415	0.0155599	0.0230421	0.01783	0	0	0	0.0157031	0.0241131	0.01907	0	0	0.01176	0.0161632	0.0161435	0.0175169	0	0.0162279	0.0180254	0.0180457	0.013897	0	0.0181415
0.0183572	0.0216983	0.0188283	0.0194794	0.0188858	0.0175742	0.0165001	0.018152	0.0205268	0.0180575	0.019616	0.0202855	0	0.0223505	0.0168689	0.0216497	0.0173295	0.0191955	0.0170676	0	0.0175588	0	0	0	0	0	0.021953	0.0176411	0.016953	0.0227483	0.0173092	0	0	0	0.0171253	0.024283	0.0216226	0	0	0.0133945	0.017493	0.0178247	0.0192755	0	0.0185265	0.0183345	0.0207811	0.0157834	0	0.0186974
0.0223235	0.0195219	0.0189857	0.0170065	0.0177006	0.0174447	0.0197758	0.0168833	0.0198055	0.0201356	0.0200834	0.0185052	0	0.0154864	0.0175866	0.0173016	0.0169137	0.0178208	0.0171589	0	0.0171219	0	0	0	0	0	0.0172687	0.0182369	0.0172766	0.0181018	0.0179318	0	0	0	0.0184853	0.0252763	0.0150254	0	0	0.0150727	0.0183525	0.0172456	0.0193213	0	0.0191903	0.0227009	0.0201894	0.0173797	0	0.0195926
0.0154058	0.0161092	0.0151884	0.0150918	0.0154055	0.0147092	0.0161484	0.0149557	0.0161524	0.0194769	0.018193	0.0209528	0	0.0176568	0.0156723	0.0213031	0.0222923	0.0162896	0.0181682	0	0.0150677	0	0	0	0	0	0.0154578	0.0151966	0.0158846	0.0171241	0.0152934	0	0	0	0.0154352	0.0168817	0.0145221	0	0	0.0117886	0.016346	0.0160675	0.0156264	0	0.015433	0.0156093	0.0156478	0.014232	0	0.0142544
0.0185655	0.0217211	0.0191589	0.0179789	0.0194319	0.0180037	0.0178808	0.0182055	0.0244343	0.0178537	0.0200429	0.0210914	0	0.0199443	0.0181208	0.0198865	0.0182597	0.018704	0.0183779	0	0.0176086	0	0	0	0	0	0.0210675	0.0189428	0.0201164	0.0190176	0.0190808	0	0	0	0.01887	0.0288608	0.0193475	0	0	0.0148208	0.0213455	0.0187216	0.0212116	0	0.0189119	0.0218582	0.0236183	0.0182079	0	0.0202213
0	0	0	0	0	0	0	0	0	0	0	0	0	0	0	0	0	0	0	0	0	0	0	0	0	0	0	0	0	0	0	0	0	0	0	0	0	0	0	0	0	0	0	0	0	0	0	0	0	0
0.0199094	0.0229163	0.0189124	0.0185533	0.0203187	0.0192676	0.0172789	0.0256677	0.0357965	0.0185088	0.0207389	0.0224782	0	0.0851916	0.0202936	0.0216943	0.0178479	0.0195117	0.0185342	0	0.0186881	0	0	0	0	0	0.0224204	0.0254645	0.0180783	0.0238305	0.0193312	0	0	0	0.0205915	0.0332302	0.0754659	0	0	0.0143085	0.019707	0.0202259	0.0216555	0	0.0202254	0.0207732	0.0229374	0.0165642	0	0.0212875
0.020235	0.0201402	0.018666	0.017285	0.0190116	0.0181762	0.0191816	0.0180067	0.0197824	0.0181513	0.0181037	0.0209273	0	0.0202871	0.0194138	0.018976	0.0174346	0.0209076	0.0193924	0	0.0175238	0	0	0	0	0	0.0213246	0.0188409	0.0178894	0.0225915	0.0187596	0	0	0	0.0183352	0.0260061	0.0248079	0	0	0.015325	0.0205952	0.0179734	0.0238279	0	0.0186552	0.0188999	0.0176201	0.0175004	0	0.0192154
0	0	0	0	0	0	0	0	0	0	0	0	0	0	0	0	0	0	0	0	0	0	0	0	0	0	0	0	0	0	0	0	0	0	0	0	0	0	0	0	0	0	0	0	0	0	0	0	0	0
0.013667	0.0140318	0.0134841	0.0134987	0.0137513	0.0134736	0.0141341	0.0158105	0.0149994	0.013803	0.0183102	0.0154454	0	0.0155194	0.0228569	0.0177546	0.02296	0.014014	0.0140063	0	0.0132094	0	0	0	0	0	0.0364044	0.0134314	0.0148239	0.0139253	0.0133524	0	0	0	0.0140727	0.0154646	0.023243	0	0	0.0149749	0.0135291	0.013695	0.0143062	0	0.0185854	0.0138614	0.0300051	0.0126956	0	0.0139423
0.0198412	0.0217229	0.0187274	0.0193662	0.0194394	0.0187033	0.0202436	0.0145028	0.0224086	0.0218534	0.0209013	0.0395131	0	0.0139858	0.0181694	0.0194628	0.0184186	0.0220416	0.0228091	0	0.019936	0	0	0	0	0	0.0193099	0.0215742	0.0204496	0.0140386	0.0190756	0	0	0	0.0199758	0.0224251	0.0135028	0	0	0.0486286	0.0327046	0.017881	0.0146366	0	0.020172	0.0213396	0.0228465	0.0226901	0	0.0286045
0.0207744	0.0241035	0.0201117	0.0192954	0.0194764	0.0187767	0.0194305	0.0194077	0.0222303	0.0196201	0.0209495	0.0224175	0	0.0217196	0.0194396	0.0208598	0.0188127	0.0202108	0.0193342	0	0.0185185	0	0	0	0	0	0.0212377	0.019155	0.0205313	0.0205401	0.0191977	0	0	0	0.0186812	0.024788	0.0189252	0	0	0.0167916	0.0200747	0.019996	0.0186512	0	0.0184567	0.0197326	0.020095	0.0179164	0	0.020354
0.0186043	0.0208035	0.0201518	0.0175776	0.019666	0.0176308	0.018767	0.0220442	0.0271313	0.0187147	0.0215008	0.0201492	0	0.0256992	0.0175216	0.0193205	0.0168849	0.0189724	0.0189203	0	0.0177301	0	0	0	0	0	0.0314887	0.0181591	0.0191733	0.0215159	0.0196449	0	0	0	0.0186436	0.0314727	0.0250969	0	0	0.0133301	0.0188557	0.0181459	0.0192379	0	0.0199354	0.0195617	0.0211011	0.0174572	0	0.0207344
0.0208123	0.0263541	0.0218547	0.02101	0.0218565	0.0206963	0.0190282	0.0188476	0.024237	0.021093	0.0215663	0.0218292	0	0.0164979	0.020683	0.0214605	0.0222717	0.0221951	0.0218075	0	0.0220891	0	0	0	0	0	0.0195035	0.0206948	0.0227078	0.0182491	0.0223466	0	0	0	0.0218763	0.0286947	0.0158243	0	0	0.0176107	0.0520362	0.0296347	0.0184905	0	0.0198367	0.0215678	0.0181976	0.0283192	0	0.0203829
0.0198758	0.0187368	0.0170338	0.0168283	0.0174813	0.0171146	0.0163666	0.0174865	0.022492	0.0196353	0.0185375	0.0212869	0	0.0237914	0.0180384	0.0178117	0.0199678	0.017552	0.018003	0	0.0169788	0	0	0	0	0	0.0204027	0.0175754	0.016704	0.0164778	0.0170229	0	0	0	0.0175082	0.0233469	0.0181711	0	0	0.0197877	0.0171458	0.0175935	0.0175711	0	0.0195328	0.0214781	0.0211621	0.015459	0	0.0193891
0.0210655	0.0248236	0.0200873	0.0238129	0.021187	0.0200873	0.0189771	0.0188261	0.0207833	0.0197919	0.0210279	0.0237983	0	0.0181634	0.0197803	0.019375	0.0193878	0.021093	0.0199141	0	0.0189594	0	0	0	0	0	0.0186424	0.0196076	0.019177	0.0184294	0.0212617	0	0	0	0.0199238	0.0275678	0.0172065	0	0	0.0175009	0.0213344	0.0206239	0.0189491	0	0.0208772	0.0208431	0.0178327	0.0212157	0	0.0197672
0	0	0	0	0	0	0	0	0	0	0	0	0	0	0	0	0	0	0	0	0	0	0	0	0	0	0	0	0	0	0	0	0	0	0	0	0	0	0	0	0	0	0	0	0	0	0	0	0	0
0.0163175	0.0175288	0.0164101	0.0169801	0.0288004	0.0159055	0.0171597	0.0183734	0.0238554	0.0194376	0.0163514	0.0162969	0	0.0139148	0.016169	0.0166948	0.0168575	0.0167127	0.0160895	0	0.016894	0	0	0	0	0	0.0181786	0.016184	0.0164034	0.0147368	0.0168175	0	0	0	0.0191179	0.0178693	0.0143818	0	0	0.0181392	0.0147111	0.0194583	0.0139637	0	0.0156732	0.0167027	0.0293046	0.0157645	0	0.0160756
0.0184562	0.0185578	0.0170721	0.0173312	0.0174605	0.0166111	0.0168701	0.0164032	0.0198153	0.0175932	0.0203874	0.0214357	0	0.0220481	0.0161217	0.0241111	0.0163575	0.0175819	0.0169927	0	0.0161752	0	0	0	0	0	0.0185417	0.0191823	0.0172536	0.0210146	0.0170131	0	0	0	0.0170797	0.0274127	0.0151381	0	0	0.015114	0.0185134	0.0161802	0.0171721	0	0.0174968	0.0190896	0.0198487	0.0172473	0	0.0202541
0.0299004	0.028347	0.0310263	0.0343314	0.0193333	0.0203049	0.0197131	0.0197842	0.0180386	0.0185699	0.0187384	0.0327842	0	0.0142263	0.0176841	0.0175815	0.0417663	0.0188039	0.0179493	0	0.0169432	0	0	0	0	0	0.0170716	0.0173318	0.0177747	0.0247652	0.0186328	0	0	0	0.0159971	0.0191111	0.024621	0	0	0.0144276	0.0182289	0.0181918	0.0241014	0	0.0188126	0.0187168	0.0165965	0.0154295	0	0.016414
0.0239947	0.0321327	0.0226645	0.0225821	0.0231872	0.0224164	0.0209904	0.0217665	0.0363251	0.0238455	0.0247876	0.0257214	0	0.0192158	0.0216431	0.0237374	0.0209726	0.0246069	0.0213101	0	0.0213888	0	0	0	0	0	0.0237337	0.0314687	0.0217034	0.0238497	0.0249786	0	0	0	0.0230587	0.0323443	0.0199767	0	0	0.0168248	0.0240674	0.022099	0.0475284	0	0.02275	0.0256073	0.0242836	0.0191527	0	0.0281035
0.0217841	0.0236043	0.0225135	0.0214136	0.020775	0.019817	0.0215651	0.0199177	0.0251007	0.0244184	0.0217518	0.0357561	0	0.0192902	0.0207092	0.0226016	0.0218739	0.0241318	0.02241	0	0.0207902	0	0	0	0	0	0.0217086	0.0190812	0.0204587	0.021029	0.0209484	0	0	0	0.0242691	0.0260219	0.0196284	0	0	0.0150992	0.0305273	0.0211375	0.0188238	0	0.0222338	0.0217239	0.02146	0.0236168	0	0.0193685
0.0202795	0.0254708	0.0197766	0.0201517	0.0211319	0.0202931	0.021422	0.0190297	0.0271589	0.0215278	0.0205994	0.0260785	0	0.0187235	0.0197734	0.0221459	0.0201112	0.0237175	0.0201819	0	0.0212902	0	0	0	0	0	0.0207247	0.0263185	0.0210455	0.0206313	0.0222282	0	0	0	0.0205465	0.0295373	0.0172285	0	0	0.0173058	0.0230686	0.0211208	0.0197981	0	0.0210299	0.0215564	0.0203612	0.0199103	0	0.0207278
0.0242893	0.0310108	0.0242957	0.0243854	0.0245776	0.02292	0.0226764	0.0201971	0.0312627	0.0260956	0.02422	0.0556178	0	0.0180721	0.0238687	0.0240321	0.0254348	0.0291827	0.0283463	0	0.0241489	0	0	0	0	0	0.0236653	0.0216465	0.0249034	0.0212412	0.024594	0	0	0	0.026987	0.032994	0.0177434	0	0	0.0169587	0.0461262	0.0261717	0.0203949	0	0.0245939	0.0246654	0.0251684	0.031031	0	0.0214302
0.021668	0.0257025	0.0227913	0.0201833	0.0212355	0.02096	0.0201311	0.0183639	0.0222274	0.0216658	0.0211278	0.0216174	0	0.0194836	0.0361753	0.0260584	0.0200793	0.0219082	0.0220703	0	0.0197293	0	0	0	0	0	0.0183368	0.0235079	0.0225802	0.0200976	0.021995	0	0	0	0.0213786	0.0252949	0.0171093	0	0	0.0158149	0.0202941	0.022756	0.0451732	0	0.019391	0.021153	0.0182721	0.0184529	0	0.0195519
0.0202911	0.0220832	0.019874	0.0206664	0.0194459	0.0184081	0.0182609	0.0189203	0.025291	0.020668	0.0241864	0.0200569	0	0.0217294	0.0196169	0.020633	0.0179241	0.0196218	0.0194206	0	0.0181188	0	0	0	0	0	0.0254137	0.018483	0.0192946	0.0205294	0.0194289	0	0	0	0.0209693	0.0275435	0.0218404	0	0	0.0157965	0.0182322	0.0184631	0.0195742	0	0.018778	0.0216288	0.0197087	0.0271728	0	0.0198664
0.0212927	0.0221732	0.0215562	0.0211423	0.0198161	0.0187141	0.0186588	0.0188033	0.0204222	0.0210527	0.0193178	0.0207258	0	0.0185632	0.0198108	0.0192871	0.0190828	0.020563	0.0189137	0	0.0189575	0	0	0	0	0	0.0194524	0.0189392	0.0183466	0.0202369	0.0194879	0	0	0	0.0211698	0.0235396	0.0178748	0	0	0.0154639	0.0200531	0.0198008	0.0209445	0	0.0186198	0.0218972	0.0212978	0.0181085	0	0.0193391
0.0192086	0.0196552	0.0192292	0.0180025	0.0181699	0.0172168	0.0198514	0.0174929	0.0225137	0.0188701	0.0193347	0.0216134	0	0.0190459	0.0193712	0.0176908	0.0185618	0.0195231	0.0183242	0	0.0178651	0	0	0	0	0	0.0184878	0.017286	0.0219297	0.0207071	0.01834	0	0	0	0.018687	0.0241705	0.0202445	0	0	0.0156828	0.0209909	0.0179726	0.0212353	0	0.0179841	0.0198934	0.0210563	0.0182367	0	0.0190038
0.0271868	0.0245846	0.0207255	0.0193027	0.0214854	0.0209783	0.0209397	0.01846	0.0199201	0.0204921	0.0187877	0.0196894	0	0.0171333	0.0190126	0.0206659	0.0184872	0.0195562	0.0186037	0	0.0189224	0	0	0	0	0	0.0183799	0.0198366	0.0187475	0.0224157	0.0198883	0	0	0	0.0202119	0.0275873	0.020117	0	0	0.017044	0.019551	0.0204258	0.017835	0	0.0212954	0.0226348	0.0175778	0.0179438	0	0.0208515
0.0208363	0.0252276	0.0205955	0.021822	0.0196987	0.0188584	0.0183315	0.0210947	0.0232566	0.0195455	0.0197003	0.0229167	0	0.0182259	0.0190817	0.0210492	0.0187651	0.0199523	0.0195193	0	0.0187005	0	0	0	0	0	0.0204325	0.0203739	0.0190224	0.0218891	0.0206971	0	0	0	0.0195933	0.0289723	0.0200178	0	0	0.0158248	0.0202351	0.0226198	0.0197486	0	0.0191329	0.0213449	0.0181383	0.0190136	0	0.0201396
0	0	0	0	0	0	0	0	0	0	0	0	0	0	0	0	0	0	0	0	0	0	0	0	0	0	0	0	0	0	0	0	0	0	0	0	0	0	0	0	0	0	0	0	0	0	0	0	0	0
0.0216735	0.0258525	0.0210248	0.0205039	0.0198979	0.0198948	0.0187273	0.0186307	0.0224446	0.0204347	0.0208905	0.0239887	0	0.0181263	0.0199272	0.0226843	0.0204132	0.0222723	0.0220996	0	0.0218878	0	0	0	0	0	0.0197317	0.0205133	0.0191351	0.020145	0.0208117	0	0	0	0.019307	0.02705	0.0179445	0	0	0.017633	0.0201144	0.0207089	0.0197671	0	0.0212108	0.0215366	0.0177679	0.0185124	0	0.0204176
0.0164919	0.0256854	0.0176139	0.0162451	0.0168715	0.0166149	0.0148328	0.0175833	0.0182184	0.0152611	0.016278	0.0162769	0	0.0195401	0.0158876	0.0156406	0.0160041	0.0159688	0.0157499	0	0.0169633	0	0	0	0	0	0.016156	0.0148925	0.0162032	0.0156082	0.0164501	0	0	0	0.0170766	0.030098	0.0127541	0	0	0.0117869	0.0225471	0.0215629	0.0166245	0	0.0159395	0.0166411	0.0159474	0.0157921	0	0.018736
0.0204658	0.0234596	0.0217704	0.0187771	0.021389	0.0195863	0.0203983	0.0185327	0.0227433	0.0216012	0.0191752	0.0231444	0	0.0168842	0.020219	0.0198846	0.0223709	0.0236637	0.0212077	0	0.0195511	0	0	0	0	0	0.02075	0.0200951	0.0190715	0.0171575	0.0203572	0	0	0	0.0199972	0.0254793	0.0163168	0	0	0.0175314	0.0201663	0.0207405	0.0189985	0	0.0206808	0.0205643	0.0183277	0.0201323	0	0.0197814
0.0236122	0.0266649	0.0210139	0.0219084	0.0227241	0.0209573	0.0232378	0.0188808	0.0274796	0.0240716	0.0235638	0.0254803	0	0.0182101	0.0204141	0.02231	0.0194398	0.0237647	0.022798	0	0.0237482	0	0	0	0	0	0.0212032	0.0248764	0.021958	0.0194644	0.0217227	0	0	0	0.0200436	0.0277117	0.0173079	0	0	0.0651749	0.0216335	0.0212339	0.0196634	0	0.0229122	0.0250505	0.018334	0.0193591	0	0.0300053
0.0191882	0.0210591	0.0187666	0.0180849	0.0186826	0.0172771	0.0176275	0.0187316	0.0219157	0.0199727	0.0187284	0.0191653	0	0.0144837	0.0173618	0.0186166	0.0186356	0.0191387	0.0186698	0	0.0182811	0	0	0	0	0	0.0206094	0.022079	0.021205	0.017941	0.051142	0	0	0	0.0246909	0.0512344	0.0142945	0	0	0.0149805	0.0250282	0.0201567	0.0198838	0	0.0177369	0.0200013	0.016442	0.0275505	0	0.0218714
0.0187869	0.0226207	0.0178206	0.0236938	0.0189862	0.0177213	0.0187008	0.0195585	0.0229977	0.0231088	0.0196426	0.0199321	0	0.0138225	0.0178149	0.0184423	0.0187133	0.0189961	0.0175775	0	0.0183254	0	0	0	0	0	0.0181308	0.0166924	0.016302	0.0353482	0.0240088	0	0	0	0.0199684	0.0200181	0.0391642	0	0	0.0169961	0.0159301	0.0204591	0.0149928	0	0.0192704	0.0192844	0.0167866	0.0151656	0	0.0160716
0.0214227	0.0255085	0.0208344	0.0208386	0.0230708	0.0204898	0.0218793	0.0228394	0.0236367	0.0232811	0.0218367	0.0230064	0	0.0193908	0.0206367	0.0221403	0.019667	0.0213904	0.0208779	0	0.0209893	0	0	0	0	0	0.0206389	0.0257213	0.0191617	0.0188509	0.0232276	0	0	0	0.0203013	0.026613	0.0164919	0	0	0.0172252	0.0204756	0.0272583	0.0199218	0	0.0209148	0.0222545	0.0191984	0.0198099	0	0.0199887
0.0209694	0.0259791	0.0201835	0.019479	0.0216193	0.0209315	0.0194972	0.0197834	0.0222892	0.0204853	0.0204721	0.0210176	0	0.0194723	0.0210689	0.0214082	0.0196096	0.0233195	0.0214143	0	0.0194538	0	0	0	0	0	0.0192633	0.0231113	0.0202692	0.0192008	0.0212467	0	0	0	0.02025	0.0261041	0.0140346	0	0	0.0137011	0.0186048	0.0229299	0.0253123	0	0.0195355	0.0207004	0.0190403	0.0180685	0	0.0189839
0.0180722	0.0206738	0.0179145	0.0181789	0.020814	0.0175745	0.0176107	0.0171935	0.029834	0.0189169	0.0186691	0.0274456	0	0.0133444	0.0182904	0.0184437	0.0180535	0.0198507	0.0193504	0	0.0189207	0	0	0	0	0	0.0182968	0.0191681	0.0187805	0.0163862	0.0195796	0	0	0	0.0217897	0.0278981	0.0158946	0	0	0.0136797	0.0257725	0.0196556	0.0237029	0	0.0182664	0.0191346	0.0182515	0.0245039	0	0.0184633
0.018596	0.0200925	0.0181103	0.0230776	0.0201871	0.0179461	0.0180339	0.0167448	0.0181858	0.0192862	0.0191313	0.0185503	0	0.0135967	0.0178864	0.0181176	0.0175453	0.0188334	0.0195967	0	0.0203785	0	0	0	0	0	0.0181652	0.0183231	0.0189787	0.0206401	0.0203305	0	0	0	0.016465	0.0189989	0.020476	0	0	0.0129626	0.0142033	0.017951	0.0267369	0	0.0189357	0.0199164	0.0169499	0.0154601	0	0.0140393
0	0	0	0	0	0	0	0	0	0	0	0	0	0	0	0	0	0	0	0	0	0	0	0	0	0	0	0	0	0	0	0	0	0	0	0	0	0	0	0	0	0	0	0	0	0	0	0	0	0
0.0251404	0.0275134	0.0207411	0.0204193	0.0214464	0.0232292	0.0193098	0.0194165	0.0240088	0.0201771	0.0199697	0.021369	0	0.018404	0.0189346	0.019503	0.0189006	0.0210019	0.0196176	0	0.0191883	0	0	0	0	0	0.0217673	0.0218017	0.0193946	0.0208826	0.0205322	0	0	0	0.0196192	0.0244342	0.0189917	0	0	0.0179706	0.0178321	0.0208696	0.0196624	0	0.0211288	0.0219509	0.0184933	0.0178217	0	0.0212971
0.0169648	0.0186565	0.0171982	0.0162981	0.022069	0.0164755	0.0175527	0.0160754	0.0195848	0.0176851	0.0172373	0.0172694	0	0.0130534	0.0210545	0.0181006	0.0172662	0.0173377	0.0177508	0	0.0173617	0	0	0	0	0	0.0159219	0.0198922	0.018555	0.0141157	0.0186661	0	0	0	0.0196075	0.0177372	0.0121337	0	0	0.0152554	0.0155682	0.0190829	0.0231472	0	0.0158973	0.0175096	0.0157755	0.0162485	0	0.0179233
0.0238236	0.0249697	0.0191255	0.02323	0.0255527	0.0208347	0.02064	0.0263241	0.0265567	0.0244114	0.0243942	0.02553	0	0.0196018	0.0208757	0.0232652	0.0217123	0.025054	0.0208816	0	0.0199967	0	0	0	0	0	0.0242176	0.0191555	0.0182438	0.0771352	0.0238388	0	0	0	0.0212793	0.032642	0.079282	0	0	0.0152256	0.0191102	0.0210897	0.0194781	0	0.0269011	0.0249341	0.0210397	0.0174017	0	0.0203894
0.0199796	0.0246013	0.022285	0.0199279	0.0206635	0.0187223	0.0176706	0.018293	0.0222644	0.0186063	0.0199005	0.0224689	0	0.0189762	0.018632	0.0198786	0.0179778	0.0196628	0.0212799	0	0.0213539	0	0	0	0	0	0.0204182	0.0188005	0.0237277	0.0204001	0.0191409	0	0	0	0.0200405	0.0289164	0.0173637	0	0	0.0436989	0.02337	0.0192005	0.0181364	0	0.0201746	0.0235971	0.0187155	0.0198579	0	0.022121
0.0243628	0.0276673	0.0224804	0.0217695	0.0235463	0.0224284	0.0226035	0.0201611	0.0273786	0.0244329	0.0225712	0.0255467	0	0.0177636	0.0234895	0.0232981	0.0220282	0.0259171	0.0228411	0	0.0227371	0	0	0	0	0	0.0224351	0.0246425	0.0238584	0.023391	0.024534	0	0	0	0.0269385	0.0302805	0.0208694	0	0	0.0173188	0.0221158	0.0215849	0.0194984	0	0.0229091	0.0255504	0.0220543	0.0277935	0	0.0300159
0.0186703	0.0221384	0.0193275	0.0187896	0.0197506	0.0176392	0.0219415	0.0183591	0.0286011	0.0192653	0.0224807	0.0215356	0	0.0173304	0.0189057	0.0198149	0.017653	0.0189831	0.018468	0	0.0184571	0	0	0	0	0	0.0211098	0.0205072	0.0186726	0.0214439	0.0208092	0	0	0	0.0193436	0.0251459	0.0197395	0	0	0.0162782	0.0190507	0.0196619	0.0174101	0	0.0183744	0.0190572	0.0185998	0.0172829	0	0.0191785
0.0199668	0.0216075	0.0185622	0.0177518	0.0199602	0.018172	0.01876	0.0176624	0.0255991	0.0188945	0.0189212	0.0239266	0	0.0188646	0.0200085	0.0200016	0.0199779	0.0242155	0.0208914	0	0.0181975	0	0	0	0	0	0.0202527	0.0189139	0.018289	0.0182483	0.0185022	0	0	0	0.0189899	0.0214795	0.015908	0	0	0.0152314	0.0208498	0.0194455	0.0188052	0	0.0196968	0.0203809	0.0194423	0.0181308	0	0.0182107
0.0228652	0.0258088	0.0222823	0.0422482	0.0205548	0.0210302	0.0206386	0.0190544	0.0219618	0.0200602	0.0209269	0.0227622	0	0.0179571	0.0202884	0.0203226	0.0190178	0.0201396	0.0195945	0	0.0197015	0	0	0	0	0	0.0195204	0.0191039	0.0191124	0.0188285	0.0204127	0	0	0	0.0188342	0.0256273	0.0170981	0	0	0.0175484	0.0205214	0.0204516	0.0188229	0	0.0192225	0.0210365	0.0202453	0.0188682	0	0.0194824
0.0225811	0.023874	0.0212972	0.0204671	0.0212415	0.0207631	0.0185866	0.021754	0.0237116	0.0193645	0.0202083	0.0202437	0	0.019627	0.0188455	0.020539	0.0185303	0.0215463	0.0206351	0	0.0213107	0	0	0	0	0	0.0206205	0.0229778	0.0211429	0.0185316	0.0199623	0	0	0	0.019771	0.0265753	0.0169197	0	0	0.0177524	0.0188925	0.0200408	0.0196483	0	0.0199695	0.0213425	0.0187632	0.0188443	0	0.0204409
0.0207069	0.0245301	0.0207843	0.0184369	0.0216456	0.0198455	0.0186004	0.0187867	0.0245583	0.01958	0.0193014	0.0209001	0	0.0192171	0.0204334	0.0210106	0.019199	0.0214669	0.0200527	0	0.0193032	0	0	0	0	0	0.01975	0.0248972	0.0194717	0.0187686	0.0215426	0	0	0	0.0196931	0.0271244	0.0160519	0	0	0.0153359	0.0196177	0.020031	0.0199171	0	0.0201486	0.0208396	0.0177443	0.0179437	0	0.0196851
0	0	0	0	0	0	0	0	0	0	0	0	0	0	0	0	0	0	0	0	0	0	0	0	0	0	0	0	0	0	0	0	0	0	0	0	0	0	0	0	0	0	0	0	0	0	0	0	0	0
0.0153957	0.0160724	0.0149595	0.0147217	0.0149761	0.0147678	0.0160264	0.01439	0.0162812	0.0156023	0.0153367	0.0177576	0	0.0124997	0.0154452	0.0152315	0.0253284	0.0159281	0.015781	0	0.0154845	0	0	0	0	0	0.0149923	0.0155554	0.0142582	0.0185374	0.0156491	0	0	0	0.0149894	0.0159993	0.0211283	0	0	0.0133416	0.0148861	0.0165582	0.0149206	0	0.0215894	0.0205975	0.0143365	0.0147113	0	0.0165233
0.0188688	0.0218842	0.0183639	0.0181521	0.0185446	0.0179117	0.0171693	0.0188531	0.0275956	0.0178182	0.021131	0.020404	0	0.0230511	0.0176504	0.0190274	0.0173548	0.018495	0.0177741	0	0.0177568	0	0	0	0	0	0.0204017	0.0197611	0.0177783	0.0202803	0.0186057	0	0	0	0.0190539	0.0348587	0.0187678	0	0	0.014956	0.022537	0.019057	0.0202727	0	0.0205781	0.0230545	0.0195142	0.0175277	0	0.0215286
0.0174934	0.0263268	0.0183268	0.0167164	0.017744	0.016847	0.0173104	0.017858	0.0182562	0.0205764	0.0170057	0.0172993	0	0.0160626	0.017435	0.0211739	0.0233673	0.0172458	0.0170006	0	0.0170682	0	0	0	0	0	0.021687	0.0190606	0.0165217	0.015625	0.0178383	0	0	0	0.0164911	0.023952	0.0150981	0	0	0.0137826	0.0157025	0.0200132	0.0172854	0	0.0215571	0.0215093	0.0164568	0.0140692	0	0.0201828
0.019428	0.0189364	0.0175388	0.0173653	0.0233304	0.018004	0.0173802	0.0215489	0.0204791	0.0203838	0.0210858	0.0190991	0	0.0600593	0.0182368	0.0200018	0.0193157	0.0200946	0.0188104	0	0.017505	0	0	0	0	0	0.0195078	0.0181714	0.0178514	0.0187605	0.018071	0	0	0	0.0180714	0.0227451	0.0190338	0	0	0.0143709	0.0179804	0.0186274	0.0209316	0	0.0180664	0.0185238	0.0176477	0.0172296	0	0.0184829
0.021106	0.0246473	0.0200294	0.0201272	0.0213387	0.0204449	0.0206	0.0236681	0.0238727	0.0206563	0.0223259	0.0240285	0	0.0462091	0.0223035	0.0205056	0.0193756	0.0204065	0.0192384	0	0.0192638	0	0	0	0	0	0.0209177	0.0202852	0.0201915	0.0211927	0.0216036	0	0	0	0.0194843	0.02754	0.0184771	0	0	0.0166953	0.0201258	0.0203337	0.0189877	0	0.0198392	0.0210709	0.0182602	0.0174356	0	0.0209394
0.0159586	0.0187366	0.0158794	0.0155936	0.0168854	0.0154855	0.0154676	0.0159031	0.0221554	0.0161053	0.0168495	0.0182658	0	0.0159608	0.0162815	0.0161057	0.0153376	0.0163148	0.0157287	0	0.015755	0	0	0	0	0	0.0164902	0.0181558	0.0162385	0.0177682	0.0176671	0	0	0	0.0165997	0.0240811	0.0135649	0	0	0.0128662	0.0178514	0.0161955	0.0185563	0	0.0166746	0.0179688	0.0224061	0.0150944	0	0.0176435
0.0157173	0.0173175	0.0153426	0.0152103	0.0166209	0.0151896	0.0153998	0.0158102	0.0225247	0.0168417	0.0173679	0.01758	0	0.016625	0.0172718	0.0162683	0.01543	0.0162809	0.0153977	0	0.0153816	0	0	0	0	0	0.017397	0.0172863	0.0158094	0.0170256	0.0171762	0	0	0	0.0162194	0.0217981	0.0142474	0	0	0.0124421	0.016842	0.0159649	0.0180562	0	0.0158321	0.0182795	0.0197289	0.0149982	0	0.0172246
0.016804	0.0198197	0.0166473	0.0160611	0.0173079	0.0168877	0.0169705	0.0167544	0.0209966	0.0173555	0.0181061	0.0179743	0	0.018748	0.017361	0.0170315	0.0159848	0.0164615	0.0158598	0	0.0159861	0	0	0	0	0	0.0172314	0.0172368	0.0161059	0.0180719	0.0175317	0	0	0	0.0167236	0.022264	0.0153743	0	0	0.0137186	0.0164205	0.0171189	0.0189054	0	0.0166567	0.0184911	0.019977	0.0149163	0	0.0177579
0.0156192	0.0156883	0.0148578	0.0144028	0.0345328	0.015485	0.0176643	0.0184125	0.0157243	0.015075	0.0330832	0.0161666	0	0.0338523	0.0151945	0.0145905	0.015455	0.01506	0.0152483	0	0.014167	0	0	0	0	0	0.0148897	0.0152094	0.0176255	0.0138951	0.014937	0	0	0	0.0135177	0.0158244	0.0132465	0	0	0.0117935	0.0131259	0.0150013	0.0132062	0	0.0144438	0.014834	0.0149188	0.0123645	0	0.0131984
0.0245379	0.0223863	0.0214471	0.0197338	0.0206824	0.0192015	0.0180533	0.0205303	0.0274835	0.0199443	0.0210027	0.021754	0	0.0229119	0.0185572	0.0200307	0.0181907	0.0203854	0.0187673	0	0.0201412	0	0	0	0	0	0.0203357	0.0239701	0.0182622	0.0418398	0.0206347	0	0	0	0.0252622	0.0302516	0.0244815	0	0	0.0154584	0.0210021	0.0202378	0.0205662	0	0.0222828	0.0210505	0.019894	0.0180166	0	0.0207442
0.0182116	0.0223149	0.0177623	0.0175578	0.017921	0.0174527	0.0167839	0.0186152	0.0276462	0.016772	0.0185331	0.0186487	0	0.0215054	0.0193171	0.0196522	0.0175014	0.0224536	0.0196072	0	0.0173333	0	0	0	0	0	0.0183551	0.0181177	0.0172808	0.0174607	0.0176372	0	0	0	0.0185846	0.0295111	0.0147323	0	0	0.0162843	0.018747	0.0185513	0.0207814	0	0.0235302	0.0234881	0.0226676	0.0161579	0	0.0203115
0.0200878	0.0297073	0.0197141	0.0191076	0.0228155	0.0189174	0.0180308	0.0200764	0.0408763	0.0185692	0.0192167	0.0189693	0	0.0209067	0.0184564	0.0201376	0.0180783	0.0188394	0.0182346	0	0.0195196	0	0	0	0	0	0.0191644	0.0208986	0.0193477	0.016595	0.0199393	0	0	0	0.0201887	0.025676	0.0140888	0	0	0.0141579	0.0190868	0.0235782	0.0201245	0	0.0186315	0.019497	0.0187437	0.0224702	0	0.019425
0.0199243	0.0249292	0.018345	0.0195268	0.0173935	0.0223788	0.0170709	0.0164886	0.0183554	0.017079	0.0171847	0.0270003	0	0.0165559	0.0252383	0.0197912	0.017155	0.0246653	0.0224568	0	0.0163899	0	0	0	0	0	0.0160215	0.0191093	0.0169161	0.0140829	0.0209688	0	0	0	0.0168544	0.0183207	0.0142979	0	0	0.0141842	0.0172898	0.0173476	0.0275888	0	0.0215106	0.0242132	0.0175322	0.0157048	0	0.0195173
0.0214096	0.0151291	0.0152477	0.0148024	0.014746	0.0292799	0.0147752	0.0160064	0.0155053	0.0141955	0.0146532	0.0146371	0	0.0220742	0.0335379	0.0226216	0.0143317	0.0153476	0.0245135	0	0.014075	0	0	0	0	0	0.0143756	0.0147436	0.0147897	0.0131123	0.0238134	0	0	0	0.0150599	0.016108	0.0158153	0	0	0.0132102	0.0128362	0.0162239	0.0169674	0	0.024211	0.0152143	0.0150463	0.0121478	0	0.0153301
0.021712	0.0236729	0.0208437	0.0218104	0.0214357	0.0195875	0.0191645	0.0202681	0.0227324	0.0226268	0.0202664	0.0219488	0	0.0198856	0.0266916	0.0236858	0.0197148	0.021468	0.0205937	0	0.0195046	0	0	0	0	0	0.0191859	0.0199367	0.0188844	0.0199368	0.0214821	0	0	0	0.0199112	0.0226946	0.0181792	0	0	0.0162635	0.0192001	0.0207512	0.0225486	0	0.0190201	0.0198884	0.0187295	0.0179473	0	0.0192362
0.0202963	0.0218835	0.0185283	0.0178129	0.0219388	0.0191506	0.018152	0.0195797	0.023367	0.0183179	0.0193032	0.0211049	0	0.0239357	0.0288884	0.022781	0.0210503	0.0201188	0.0191515	0	0.0206812	0	0	0	0	0	0.0199982	0.0192322	0.0183725	0.0200024	0.0194518	0	0	0	0.0192463	0.0224836	0.0182394	0	0	0.01606	0.0188638	0.0206602	0.0217266	0	0.0197595	0.0211293	0.0200711	0.0152536	0	0.0197798
0.022419	0.0238549	0.0210251	0.0198493	0.0220188	0.0209323	0.0206479	0.0291065	0.0272256	0.0205051	0.024653	0.0264061	0	0.0218917	0.0223159	0.0213886	0.0194065	0.0222587	0.0207784	0	0.0208868	0	0	0	0	0	0.0220305	0.0200959	0.0212948	0.0427084	0.0208887	0	0	0	0.0195767	0.0302474	0.0226754	0	0	0.0153715	0.0204405	0.0240373	0.0333378	0	0.0222003	0.0226068	0.0215814	0.0179952	0	0.0278955
0.0206692	0.022703	0.0198498	0.0189956	0.0197337	0.0182391	0.0178164	0.0194201	0.0260317	0.0203439	0.0196523	0.0229692	0	0.0192754	0.0187157	0.0205786	0.017963	0.0231505	0.0205501	0	0.0182809	0	0	0	0	0	0.021305	0.0195463	0.0179589	0.0212949	0.0188928	0	0	0	0.0192478	0.0258966	0.0182363	0	0	0.0148897	0.0200892	0.0245554	0.0198184	0	0.0189463	0.0193913	0.0198451	0.0176827	0	0.0202829
0.0265275	0.0193055	0.0191099	0.0173344	0.018277	0.0182047	0.0170223	0.0186006	0.0270407	0.0175667	0.0205828	0.0183129	0	0.0235381	0.0169755	0.0222776	0.0164033	0.0229969	0.0181407	0	0.0170457	0	0	0	0	0	0.0194622	0.0363488	0.017008	0.0282028	0.0180748	0	0	0	0.0199044	0.0287597	0.0216558	0	0	0.0149464	0.0166168	0.0176753	0.0233648	0	0.0241737	0.0192915	0.0195344	0.0149594	0	0.0203312
0.021153	0.033204	0.0223209	0.020793	0.0220079	0.0207084	0.0193548	0.0193579	0.0220616	0.0209329	0.0207313	0.0237917	0	0.0224861	0.0205331	0.0206256	0.020004	0.0312672	0.0331852	0	0.0208859	0	0	0	0	0	0.0205581	0.0208461	0.0220329	0.0178763	0.0218721	0	0	0	0.0203949	0.0226907	0.0144503	0	0	0.01569	0.0195922	0.0220243	0.0192792	0	0.0215135	0.0214119	0.020185	0.0200497	0	0.0219107
0.0193421	0.0273118	0.0199659	0.0187619	0.0194598	0.0183406	0.0213827	0.0192376	0.0305605	0.0202563	0.0187637	0.0220859	0	0.0196116	0.0229023	0.0208057	0.018498	0.0196104	0.0190118	0	0.0190771	0	0	0	0	0	0.0264204	0.0204004	0.0185232	0.0176614	0.0196535	0	0	0	0.0200689	0.028624	0.0221575	0	0	0.0148443	0.0210808	0.0213372	0.0197333	0	0.018579	0.0193772	0.017763	0.0189088	0	0.0188589
0.019084	0.0199259	0.0184574	0.0177379	0.018846	0.0186053	0.0169901	0.0181731	0.0255477	0.0183844	0.0185919	0.0223494	0	0.0180762	0.017375	0.0179942	0.0214279	0.0195732	0.0188335	0	0.0182055	0	0	0	0	0	0.0227033	0.0178915	0.0183019	0.0160649	0.0184065	0	0	0	0.0203117	0.0313949	0.0154963	0	0	0.0151749	0.0235981	0.0188893	0.0195926	0	0.0208069	0.0200564	0.018326	0.0206635	0	0.0351843
0.0238273	0.0251182	0.0189828	0.0229073	0.0253567	0.0206265	0.0204641	0.0248296	0.0261131	0.0243458	0.0245248	0.0256402	0	0.018836	0.0205636	0.0232218	0.0217836	0.0244489	0.0207097	0	0.0197361	0	0	0	0	0	0.0241889	0.0191553	0.0181785	0.08064	0.023885	0	0	0	0.0206269	0.0322672	0.0830752	0	0	0.0151006	0.0190946	0.0204344	0.0192122	0	0.0270493	0.0250302	0.0205841	0.0172527	0	0.019988
0.017253	0.0185341	0.0194297	0.0169882	0.0175338	0.0167911	0.0174817	0.0175792	0.0249255	0.0211786	0.0180464	0.0258242	0	0.0180076	0.0176676	0.0225862	0.0219992	0.0180344	0.0175613	0	0.0176671	0	0	0	0	0	0.017468	0.0182646	0.0174612	0.0205161	0.0176301	0	0	0	0.018212	0.0222848	0.0174702	0	0	0.0124234	0.0191286	0.0185502	0.0175548	0	0.0173794	0.0177684	0.0174923	0.0164664	0	0.0177475
0.0367032	0.033869	0.0377847	0.0198845	0.0202798	0.0217227	0.0202111	0.0173785	0.0178342	0.0188902	0.0177344	0.0177626	0	0.0130572	0.0177136	0.0178422	0.0175562	0.0354953	0.0398707	0	0.018417	0	0	0	0	0	0.0162806	0.021204	0.0181035	0.0134185	0.0188829	0	0	0	0.0159493	0.0177432	0.0125699	0	0	0.0345575	0.0142556	0.0192949	0.0140184	0	0.0203339	0.0195428	0.0136647	0.0156469	0	0.0201476
0.0199383	0.01765	0.0179712	0.0164291	0.0170108	0.0166753	0.0205103	0.0173455	0.0180304	0.0188207	0.018632	0.0216673	0	0.0191082	0.0164288	0.0176774	0.0189924	0.0171006	0.0165994	0	0.0166342	0	0	0	0	0	0.0167707	0.0165429	0.0165672	0.0188048	0.0169806	0	0	0	0.0162577	0.0218555	0.0170211	0	0	0.0126515	0.0176156	0.0176964	0.01715	0	0.0166466	0.0174995	0.021917	0.0158312	0	0.0178706
0.0205349	0.0223836	0.0196354	0.0215405	0.0201321	0.0190386	0.0207169	0.0187655	0.0237526	0.0201096	0.0196892	0.0234029	0	0.0196439	0.0188586	0.0206272	0.0182942	0.02005	0.0192905	0	0.0197053	0	0	0	0	0	0.0190827	0.0192216	0.0181368	0.0198673	0.0190516	0	0	0	0.0194918	0.0240806	0.0173792	0	0	0.015505	0.0195812	0.0200066	0.0202914	0	0.0209154	0.0209991	0.0180628	0.0184455	0	0.0190142
0.0203636	0.0225643	0.0194711	0.018393	0.0202265	0.0181681	0.018567	0.0213795	0.02625	0.0197534	0.0209765	0.0224256	0	0.0177715	0.0177412	0.0184234	0.0185756	0.0199449	0.0199803	0	0.0182233	0	0	0	0	0	0.0199853	0.0188729	0.0196559	0.0188588	0.0193478	0	0	0	0.0220478	0.025224	0.017966	0	0	0.0311169	0.0199103	0.0197989	0.0190482	0	0.0208688	0.02067	0.0175054	0.0185016	0	0.0194177
0.0220162	0.023947	0.0207027	0.0197072	0.02056	0.0196964	0.0200384	0.0199975	0.0239285	0.0212009	0.0227352	0.0235014	0	0.018456	0.0189238	0.021499	0.0187396	0.0207674	0.0201494	0	0.0197205	0	0	0	0	0	0.0197528	0.0199462	0.0218466	0.0197151	0.021511	0	0	0	0.0198182	0.026494	0.017105	0	0	0.016908	0.0209037	0.0203059	0.0458146	0	0.0201813	0.0215028	0.0182377	0.019281	0	0.0196709
0.0222414	0.0256362	0.0207035	0.0197997	0.0228664	0.0195247	0.0200178	0.0191322	0.0245541	0.0218587	0.020208	0.0229676	0	0.0174303	0.0223975	0.0212886	0.0201446	0.021403	0.0209609	0	0.0219259	0	0	0	0	0	0.0191366	0.0222455	0.0203718	0.0205226	0.022761	0	0	0	0.0218763	0.0259486	0.0171684	0	0	0.0180975	0.0212198	0.0236415	0.0446076	0	0.0218052	0.0238625	0.0201051	0.0197729	0	0.0207668
0.0203147	0.0281739	0.0234071	0.0202741	0.0205209	0.019353	0.0185684	0.0194959	0.022295	0.0216677	0.0241571	0.0228589	0	0.0202298	0.0206643	0.0209346	0.0250953	0.020656	0.0195146	0	0.0193518	0	0	0	0	0	0.0200042	0.0189002	0.0190851	0.0187872	0.0201684	0	0	0	0.021748	0.0307987	0.0171809	0	0	0.0151636	0.0227851	0.0222437	0.0173566	0	0.0205252	0.0218997	0.0206337	0.019418	0	0.0214205
0.0146097	0.0155635	0.0147797	0.0140408	0.0147483	0.0192823	0.0149451	0.0156491	0.0169735	0.0149222	0.0150369	0.0179115	0	0.0162798	0.0148533	0.0158934	0.0144041	0.0150326	0.0149446	0	0.0150234	0	0	0	0	0	0.0226408	0.0160117	0.0148441	0.015914	0.0168312	0	0	0	0.0147743	0.0181715	0.0188148	0	0	0.0117014	0.0158478	0.0151144	0.0153332	0	0.0143021	0.0147486	0.014466	0.0136718	0	0.0155078
0	0	0	0	0	0	0	0	0	0	0	0	0	0	0	0	0	0	0	0	0	0	0	0	0	0	0	0	0	0	0	0	0	0	0	0	0	0	0	0	0	0	0	0	0	0	0	0	0	0
0.0206943	0.0241407	0.0199819	0.0191682	0.0199547	0.0185946	0.0180895	0.0204505	0.0244125	0.0189805	0.0206336	0.021774	0	0.0169898	0.019312	0.0200746	0.0188017	0.0203614	0.0185673	0	0.0193614	0	0	0	0	0	0.0188009	0.0194588	0.0183146	0.0198594	0.0206082	0	0	0	0.0201905	0.025539	0.0174337	0	0	0.01494	0.0215237	0.0207669	0.01953	0	0.0187038	0.0192634	0.0233344	0.0185107	0	0.0189724
0.0213234	0.0240038	0.020605	0.0195027	0.0208593	0.0202395	0.0205257	0.0185175	0.0233966	0.0212455	0.0195226	0.0227714	0	0.0175476	0.0221901	0.0223947	0.0205379	0.0203972	0.0196991	0	0.0203637	0	0	0	0	0	0.0204166	0.0201043	0.0189822	0.019435	0.0217886	0	0	0	0.0222971	0.0249062	0.0177425	0	0	0.017204	0.0208913	0.0238973	0.0186115	0	0.0196275	0.0220857	0.0181883	0.0194475	0	0.0199488
0.0214959	0.0256963	0.0209116	0.0208918	0.0210095	0.0204452	0.0205996	0.0191941	0.0246295	0.0209479	0.020699	0.0241655	0	0.018323	0.0192643	0.0198407	0.0205496	0.0235842	0.0214238	0	0.025049	0	0	0	0	0	0.0215454	0.0207222	0.0209935	0.0222039	0.0219088	0	0	0	0.0201232	0.0289453	0.0186898	0	0	0.0168984	0.0219755	0.0206422	0.0202217	0	0.0226679	0.0234861	0.019157	0.0190726	0	0.0211745
0.0220987	0.0250916	0.0218441	0.0188856	0.0221493	0.0198942	0.0193555	0.0191193	0.0232772	0.0215237	0.0196247	0.0221242	0	0.0179301	0.0204395	0.02186	0.0206407	0.0219676	0.02119	0	0.0212927	0	0	0	0	0	0.019471	0.0204246	0.0204116	0.0202249	0.0224632	0	0	0	0.0204312	0.0256593	0.0176515	0	0	0.0172839	0.0220871	0.0217369	0.0194141	0	0.0200614	0.0228139	0.0184614	0.0193529	0	0.0196792
0.0216985	0.0247387	0.0209605	0.0208705	0.0213266	0.0195785	0.0206938	0.0190676	0.0243423	0.0209637	0.0200859	0.0224102	0	0.0199857	0.0197206	0.0220598	0.0195476	0.0220394	0.0208156	0	0.0193262	0	0	0	0	0	0.0205311	0.020587	0.0204089	0.0193244	0.0207892	0	0	0	0.0197234	0.0260225	0.0168353	0	0	0.0178153	0.0205033	0.0209121	0.0202946	0	0.0202158	0.0225928	0.0196046	0.0183885	0	0.0200881
0.0279739	0.0334341	0.0258733	0.023789	0.0280933	0.0245872	0.0232927	0.0233611	0.0350019	0.0285331	0.0309379	0.0285233	0	0.0248395	0.0205482	0.0268484	0.0235843	0.027371	0.0228909	0	0.0231118	0	0	0	0	0	0.0297328	0.0365679	0.0287099	0.0499467	0.0263451	0	0	0	0.0208142	0.0411015	0.0218692	0	0	0.0159521	0.0216562	0.0207922	0.0220318	0	0.0258994	0.0289735	0.0301352	0.0193276	0	0.0222417
0.0196202	0.0229798	0.0197638	0.0190097	0.0208281	0.018678	0.0189637	0.0184354	0.0224763	0.0214308	0.0292472	0.0231124	0	0.0200087	0.0196757	0.0216368	0.0190897	0.0198822	0.0192565	0	0.0198188	0	0	0	0	0	0.0195716	0.0201278	0.018202	0.0216003	0.0206233	0	0	0	0.0189659	0.0250841	0.0256597	0	0	0.0158413	0.0195183	0.0228244	0.0181951	0	0.0200086	0.020398	0.0183101	0.0178467	0	0.0189923
0.0212425	0.0252907	0.0204964	0.0191417	0.0201676	0.0196836	0.0199019	0.0184006	0.0255133	0.0208739	0.0193681	0.0213714	0	0.0170122	0.0209591	0.020759	0.0195614	0.0201892	0.0214166	0	0.0214033	0	0	0	0	0	0.0199063	0.0201018	0.0186442	0.018903	0.0208568	0	0	0	0.0195189	0.0231038	0.0182697	0	0	0.0162369	0.0184192	0.02406	0.0196239	0	0.018884	0.0213888	0.0172448	0.0185485	0	0.0195017
0.0242794	0.0293728	0.0216045	0.0204218	0.0220091	0.0211657	0.0185244	0.018548	0.0246202	0.0189076	0.0192329	0.0241921	0	0.0177968	0.021399	0.018818	0.018599	0.0214362	0.0203383	0	0.0190508	0	0	0	0	0	0.0192473	0.0197393	0.0193227	0.0186607	0.0199032	0	0	0	0.0193811	0.0222075	0.0172056	0	0	0.0184369	0.0187257	0.0206062	0.0170174	0	0.0204738	0.0201419	0.01804	0.0183738	0	0.0203984
0	0	0	0	0	0	0	0	0	0	0	0	0	0	0	0	0	0	0	0	0	0	0	0	0	0	0	0	0	0	0	0	0	0	0	0	0	0	0	0	0	0	0	0	0	0	0	0	0	0
0.0229614	0.0259927	0.023444	0.0197323	0.0239923	0.0205539	0.0207515	0.0222126	0.02295	0.0212272	0.0195319	0.0214651	0	0.0180748	0.021902	0.021071	0.0196843	0.0219555	0.0205968	0	0.022436	0	0	0	0	0	0.0201101	0.0201607	0.0192437	0.0175133	0.0217634	0	0	0	0.0202078	0.0233165	0.0161672	0	0	0.0168757	0.0199239	0.0214537	0.0193408	0	0.0202814	0.0214741	0.0206395	0.0192247	0	0.0195717
0	0	0	0	0	0	0	0	0	0	0	0	0	0	0	0	0	0	0	0	0	0	0	0	0	0	0	0	0	0	0	0	0	0	0	0	0	0	0	0	0	0	0	0	0	0	0	0	0	0
0.0196379	0.0172302	0.0164646	0.0156869	0.0161257	0.0232428	0.0163163	0.0170911	0.0179156	0.0160605	0.016859	0.0170203	0	0.0231177	0.0269901	0.0203801	0.0312083	0.0166744	0.0211219	0	0.0150487	0	0	0	0	0	0.0164844	0.0176391	0.0168073	0.0164379	0.020818	0	0	0	0.0160307	0.0293647	0.0151535	0	0	0.0128916	0.0174054	0.0159295	0.0193977	0	0.0206464	0.0166975	0.0158283	0.0146868	0	0.0187617
0.0184435	0.0168526	0.0162761	0.0160391	0.0168521	0.0213281	0.0142163	0.0190819	0.019911	0.0242367	0.017257	0.0167724	0	0.0442925	0.0226708	0.019057	0.0152354	0.0165177	0.019148	0	0.0155946	0	0	0	0	0	0.0181809	0.0157723	0.0150686	0.0140628	0.0189186	0	0	0	0.0173343	0.0322075	0.0284055	0	0	0.0124039	0.0173763	0.0161871	0.0192083	0	0.0199727	0.0170298	0.020209	0.014759	0	0.0192955
0.0207264	0.0227954	0.0187402	0.018236	0.0201007	0.0187087	0.0185147	0.0183733	0.0220116	0.018853	0.0195403	0.0221511	0	0.0178894	0.0178769	0.0185287	0.0205756	0.0220347	0.0191995	0	0.0178472	0	0	0	0	0	0.0181479	0.0187883	0.0216875	0.0221976	0.0189117	0	0	0	0.0179375	0.0249874	0.0177488	0	0	0.016447	0.0204255	0.0189397	0.0198407	0	0.0198211	0.0199884	0.0180343	0.017834	0	0.0199696
0.0200847	0.0218419	0.0184524	0.0181816	0.019588	0.0188117	0.0176288	0.019305	0.0261346	0.0181734	0.0200055	0.0206444	0	0.0217989	0.0179727	0.019909	0.0209001	0.0193087	0.0189324	0	0.0182498	0	0	0	0	0	0.0208153	0.0183059	0.017847	0.0209655	0.0186051	0	0	0	0.018929	0.0283609	0.019365	0	0	0.0153173	0.0197139	0.0220758	0.019499	0	0.0197861	0.0199636	0.0201425	0.0163893	0	0.0198914
0.0202451	0.0221503	0.0188912	0.0189108	0.020087	0.0179707	0.0217226	0.0218119	0.0225017	0.0196938	0.0209172	0.025587	0	0.0177082	0.0183329	0.0190953	0.0204281	0.0230402	0.0226383	0	0.0179774	0	0	0	0	0	0.0205537	0.0188022	0.0184277	0.0217277	0.0194773	0	0	0	0.019014	0.0262786	0.0203397	0	0	0.0149233	0.0206166	0.0194517	0.0178914	0	0.0204656	0.021099	0.0188788	0.0183762	0	0.0189541
0	0	0	0	0	0	0	0	0	0	0	0	0	0	0	0	0	0	0	0	0	0	0	0	0	0	0	0	0	0	0	0	0	0	0	0	0	0	0	0	0	0	0	0	0	0	0	0	0	0
0.0195007	0.0241466	0.0197097	0.0184248	0.0203163	0.0183932	0.0183098	0.0195345	0.0269322	0.0209018	0.019805	0.0207004	0	0.0202576	0.0193843	0.0212869	0.0186863	0.0196739	0.0200104	0	0.0198773	0	0	0	0	0	0.019142	0.020674	0.0192804	0.0236565	0.0200506	0	0	0	0.0208055	0.0267478	0.0200074	0	0	0.0180164	0.0225171	0.0224071	0.020006	0	0.018978	0.0199323	0.0180737	0.0180313	0	0.0205276
0.0222019	0.035213	0.0213391	0.0203357	0.0201786	0.0199355	0.0189937	0.0188886	0.0301069	0.0263995	0.0203286	0.0202623	0	0.0172506	0.018	0.0189848	0.019483	0.0200112	0.0188135	0	0.019695	0	0	0	0	0	0.0192851	0.0212341	0.0201687	0.0197168	0.0199489	0	0	0	0.0185902	0.0216516	0.0168352	0	0	0.0133441	0.0179856	0.0223244	0.0182698	0	0.0191385	0.0198116	0.0259044	0.0158884	0	0.0196276
0.0161614	0.0170132	0.0155686	0.0152173	0.0156947	0.0180417	0.015816	0.0158837	0.0185572	0.018402	0.0209155	0.0162938	0	0.019366	0.0175819	0.0202102	0.0152571	0.0158891	0.0161197	0	0.0158234	0	0	0	0	0	0.0205058	0.0162263	0.0163514	0.014383	0.0169775	0	0	0	0.0172718	0.0185376	0.0151522	0	0	0.0129109	0.0149626	0.0159423	0.0158417	0	0.0162897	0.0176738	0.0149688	0.0172834	0	0.0174503
0.0197042	0.0205912	0.0180453	0.0177079	0.0176911	0.0173244	0.0250757	0.0183587	0.0271743	0.0176064	0.0188366	0.0204832	0	0.0249338	0.0191086	0.0246231	0.017344	0.0180475	0.017427	0	0.0174738	0	0	0	0	0	0.0179943	0.0178233	0.0175584	0.0167987	0.018055	0	0	0	0.0196243	0.0287879	0.0159059	0	0	0.0138212	0.0215565	0.0201011	0.0178003	0	0.0179265	0.0218074	0.0179935	0.019158	0	0.0187611
0.0176928	0.019968	0.0173233	0.0170617	0.0175307	0.0208575	0.0177065	0.0176909	0.0204068	0.0212526	0.0184855	0.0184568	0	0.0245397	0.0188201	0.0201275	0.0173469	0.017942	0.0169235	0	0.0167597	0	0	0	0	0	0.0171183	0.0185398	0.0174551	0.0209232	0.0178959	0	0	0	0.0176106	0.0193276	0.0188119	0	0	0.0139512	0.0173789	0.0180536	0.0207816	0	0.017604	0.0223963	0.0168645	0.0157965	0	0.018546
0.0173253	0.0180351	0.0161231	0.0162363	0.0164784	0.0162844	0.0153276	0.0170138	0.0223382	0.0157803	0.0206223	0.0188056	0	0.0291979	0.0178857	0.0183012	0.017428	0.0166456	0.0179075	0	0.0153722	0	0	0	0	0	0.0171749	0.0166823	0.0159428	0.0157838	0.015885	0	0	0	0.0167944	0.025773	0.0163845	0	0	0.0135092	0.0171351	0.015931	0.0194621	0	0.0206043	0.0213538	0.02153	0.015651	0	0.0175678
0	0	0	0	0	0	0	0	0	0	0	0	0	0	0	0	0	0	0	0	0	0	0	0	0	0	0	0	0	0	0	0	0	0	0	0	0	0	0	0	0	0	0	0	0	0	0	0	0	0
0	0	0	0	0	0	0	0	0	0	0	0	0	0	0	0	0	0	0	0	0	0	0	0	0	0	0	0	0	0	0	0	0	0	0	0	0	0	0	0	0	0	0	0	0	0	0	0	0	0
0.0222939	0.0305658	0.0217997	0.0225354	0.0239383	0.0220734	0.0219119	0.0195721	0.0344341	0.0227522	0.0232657	0.0279835	0	0.0177468	0.0201074	0.0206267	0.0236778	0.0244227	0.0238971	0	0.0231609	0	0	0	0	0	0.0221093	0.021996	0.0274242	0.0370681	0.0228844	0	0	0	0.0231885	0.0320919	0.018687	0	0	0.0164916	0.0482475	0.0284991	0.0222604	0	0.0224107	0.0237836	0.0230949	0.0209152	0	0.0284796
0.0197905	0.02319	0.0203029	0.0190314	0.0205325	0.0184756	0.0182206	0.0211827	0.0239601	0.019814	0.0220178	0.0219477	0	0.0180143	0.0188029	0.0185091	0.0184006	0.021908	0.021371	0	0.0184814	0	0	0	0	0	0.0194655	0.0199252	0.0188887	0.0386404	0.0194573	0	0	0	0.0191648	0.025192	0.0170866	0	0	0.0155091	0.0213375	0.0196924	0.0195283	0	0.0197397	0.0193772	0.0197127	0.01758	0	0.0266681
0.0208915	0.0241481	0.020007	0.0196443	0.0225033	0.0196436	0.0205382	0.0240954	0.0249491	0.019671	0.0218142	0.0222694	0	0.0182946	0.018963	0.0200905	0.0181877	0.0226319	0.0208163	0	0.0204337	0	0	0	0	0	0.0197807	0.0253068	0.0190054	0.0228327	0.0217227	0	0	0	0.019405	0.0247551	0.0186038	0	0	0.0167242	0.0207615	0.0204543	0.0201105	0	0.0207289	0.0219342	0.0212798	0.0180146	0	0.0201075
0.0224721	0.0224259	0.0193772	0.0195644	0.0210795	0.0188607	0.0191153	0.0187303	0.0276406	0.0191734	0.0205629	0.0214669	0	0.0194364	0.0187043	0.0201675	0.0194624	0.0205574	0.0205537	0	0.0203559	0	0	0	0	0	0.0209554	0.0199982	0.0195869	0.0221059	0.019685	0	0	0	0.0202033	0.023793	0.0178525	0	0	0.0169931	0.0236252	0.0211791	0.0203676	0	0.020176	0.0212919	0.0195434	0.0183113	0	0.0202764
0.0188921	0.0262117	0.0191701	0.020102	0.0228394	0.0184839	0.0189395	0.019065	0.0283994	0.0199639	0.0199025	0.0207338	0	0.0181632	0.0184706	0.0192723	0.0182869	0.0196182	0.0194266	0	0.0191599	0	0	0	0	0	0.0186938	0.0199571	0.0192452	0.0214078	0.0195162	0	0	0	0.0195279	0.0253254	0.0172024	0	0	0.0171281	0.0221742	0.0215926	0.0204438	0	0.0190626	0.0209994	0.0186002	0.0182679	0	0.0203897
0.0211762	0.0230943	0.0205778	0.01917	0.0212638	0.019214	0.0188094	0.0188068	0.026147	0.019245	0.018847	0.0225125	0	0.017558	0.0188321	0.021517	0.0179821	0.0203396	0.0205656	0	0.0194729	0	0	0	0	0	0.0191772	0.0205729	0.0190571	0.0202416	0.0203081	0	0	0	0.0193666	0.0245133	0.0166159	0	0	0.0157805	0.0205843	0.0206415	0.0521258	0	0.0197808	0.020975	0.020843	0.0191363	0	0.019683
0	0	0	0	0	0	0	0	0	0	0	0	0	0	0	0	0	0	0	0	0	0	0	0	0	0	0	0	0	0	0	0	0	0	0	0	0	0	0	0	0	0	0	0	0	0	0	0	0	0
0	0	0	0	0	0	0	0	0	0	0	0	0	0	0	0	0	0	0	0	0	0	0	0	0	0	0	0	0	0	0	0	0	0	0	0	0	0	0	0	0	0	0	0	0	0	0	0	0	0
0	0	0	0	0	0	0	0	0	0	0	0	0	0	0	0	0	0	0	0	0	0	0	0	0	0	0	0	0	0	0	0	0	0	0	0	0	0	0	0	0	0	0	0	0	0	0	0	0	0
0	0	0	0	0	0	0	0	0	0	0	0	0	0	0	0	0	0	0	0	0	0	0	0	0	0	0	0	0	0	0	0	0	0	0	0	0	0	0	0	0	0	0	0	0	0	0	0	0	0
0	0	0	0	0	0	0	0	0	0	0	0	0	0	0	0	0	0	0	0	0	0	0	0	0	0	0	0	0	0	0	0	0	0	0	0	0	0	0	0	0	0	0	0	0	0	0	0	0	0
0	0	0	0	0	0	0	0	0	0	0	0	0	0	0	0	0	0	0	0	0	0	0	0	0	0	0	0	0	0	0	0	0	0	0	0	0	0	0	0	0	0	0	0	0	0	0	0	0	0
0.018472	0.0195028	0.018124	0.0180623	0.0191261	0.0168904	0.0178055	0.0180998	0.0196671	0.0333007	0.0182001	0.0187171	0	0.0138148	0.0175834	0.0172428	0.0183804	0.0190574	0.0178567	0	0.0196623	0	0	0	0	0	0.018189	0.0176883	0.0183189	0.0309448	0.019439	0	0	0	0.0201779	0.035255	0.0280449	0	0	0.0150972	0.0313285	0.0201757	0.0142649	0	0.0180506	0.0189648	0.0165229	0.0165014	0	0.0185552
0.0222886	0.0229195	0.0195479	0.0216108	0.0202155	0.0203708	0.0181187	0.0188434	0.0225442	0.0210712	0.0222589	0.024495	0	0.0201993	0.019392	0.0209987	0.019206	0.0208902	0.0196172	0	0.0188271	0	0	0	0	0	0.0194779	0.019159	0.0198851	0.0221215	0.0205057	0	0	0	0.0218796	0.0250966	0.0204216	0	0	0.0169044	0.0200058	0.0193796	0.0194562	0	0.0196059	0.0219517	0.0214456	0.018112	0	0.0200286
0.0221528	0.0266668	0.0220109	0.0221209	0.0231563	0.0216633	0.021035	0.021076	0.0241234	0.0218096	0.0201266	0.0237381	0	0.0172004	0.0201006	0.0214448	0.0194894	0.0224796	0.021032	0	0.0231898	0	0	0	0	0	0.0227663	0.0213608	0.0237437	0.0187418	0.0233815	0	0	0	0.0239958	0.0257962	0.0169301	0	0	0.0167767	0.0213036	0.0237278	0.0192368	0	0.0210254	0.0220834	0.0177828	0.0348852	0	0.0271169
0.02061	0.0240771	0.0218029	0.0200229	0.02091	0.0211028	0.0197615	0.0189317	0.0224615	0.0204093	0.0190377	0.020399	0	0.015129	0.0207003	0.0203851	0.0187081	0.0197684	0.0192274	0	0.0205311	0	0	0	0	0	0.0180217	0.0199572	0.0235116	0.016928	0.021937	0	0	0	0.0206525	0.0224516	0.0146376	0	0	0.0181602	0.0184386	0.0217296	0.0193038	0	0.0197117	0.0199793	0.0161428	0.0231188	0	0.0210335
0.0208858	0.0280435	0.023759	0.0193935	0.0214385	0.0201185	0.0198241	0.0192472	0.0197043	0.0193205	0.0182475	0.0208843	0	0.0168501	0.0213434	0.0189064	0.0196296	0.0200628	0.0189668	0	0.0207701	0	0	0	0	0	0.0193942	0.0197775	0.0199536	0.0161504	0.0199101	0	0	0	0.0198912	0.0256571	0.0138199	0	0	0.0174623	0.0230349	0.0219197	0.0184947	0	0.0183644	0.0198963	0.0167331	0.0218676	0	0.0210797
0.0345352	0.0493855	0.0257849	0.0245961	0.0229069	0.0244075	0.0221322	0.0160781	0.0231385	0.0215738	0.0210413	0.0284563	0	0.0142901	0.0187204	0.0192772	0.0222157	0.0222959	0.0224956	0	0.0217722	0	0	0	0	0	0.0189495	0.020588	0.0251632	0.0230266	0.0217161	0	0	0	0.0185308	0.0218491	0.0136498	0	0	0.0266192	0.0351223	0.025808	0.0149361	0	0.0208866	0.0211107	0.0191487	0.0178108	0	0.0284339
0	0	0	0	0	0	0	0	0	0	0	0	0	0	0	0	0	0	0	0	0	0	0	0	0	0	0	0	0	0	0	0	0	0	0	0	0	0	0	0	0	0	0	0	0	0	0	0	0	0
0	0	0	0	0	0	0	0	0	0	0	0	0	0	0	0	0	0	0	0	0	0	0	0	0	0	0	0	0	0	0	0	0	0	0	0	0	0	0	0	0	0	0	0	0	0	0	0	0	0
0	0	0	0	0	0	0	0	0	0	0	0	0	0	0	0	0	0	0	0	0	0	0	0	0	0	0	0	0	0	0	0	0	0	0	0	0	0	0	0	0	0	0	0	0	0	0	0	0	0
0.0215004	0.0270453	0.0217363	0.0206586	0.0231598	0.0192539	0.0194037	0.0217597	0.0238511	0.0235867	0.0211845	0.0225309	0	0.0176146	0.0212065	0.0225812	0.0224317	0.0222848	0.021302	0	0.0224703	0	0	0	0	0	0.0208438	0.0209217	0.0215174	0.019783	0.0252753	0	0	0	0.0288244	0.0266546	0.0175348	0	0	0.0267178	0.020974	0.0239758	0.0194652	0	0.0205699	0.022939	0.0184115	0.0354629	0	0.020029
0	0	0	0	0	0	0	0	0	0	0	0	0	0	0	0	0	0	0	0	0	0	0	0	0	0	0	0	0	0	0	0	0	0	0	0	0	0	0	0	0	0	0	0	0	0	0	0	0	0
0.020805	0.0235938	0.0201332	0.0208125	0.0223479	0.0189795	0.0189813	0.0183702	0.0215187	0.0197227	0.0184003	0.0210958	0	0.0190639	0.02054	0.0208906	0.0187663	0.0203603	0.0207587	0	0.0201893	0	0	0	0	0	0.0188135	0.0188739	0.0206593	0.0207121	0.0201291	0	0	0	0.0198011	0.0231217	0.0180381	0	0	0.0176445	0.0216676	0.0245877	0.0190142	0	0.0219836	0.0235514	0.0176961	0.0192162	0	0.0192488
0.0220595	0.0271296	0.0219474	0.0214131	0.0245869	0.0210582	0.0207525	0.0215877	0.0238479	0.0223463	0.0215255	0.0238811	0	0.0171323	0.0202563	0.0205645	0.0199192	0.02241	0.0216542	0	0.0223285	0	0	0	0	0	0.0191798	0.025908	0.0198147	0.0188474	0.021094	0	0	0	0.0202655	0.0230948	0.0163792	0	0	0.0164584	0.0198023	0.0225096	0.0187858	0	0.0199849	0.0213873	0.0178056	0.0189144	0	0.0192735
0	0	0	0	0	0	0	0	0	0	0	0	0	0	0	0	0	0	0	0	0	0	0	0	0	0	0	0	0	0	0	0	0	0	0	0	0	0	0	0	0	0	0	0	0	0	0	0	0	0
0.0203106	0.0216767	0.0188238	0.0174718	0.0196969	0.0175376	0.0183418	0.0171485	0.0226502	0.0187219	0.0181033	0.0214792	0	0.0154291	0.0194982	0.0198077	0.0185567	0.0194864	0.0189354	0	0.0221043	0	0	0	0	0	0.0177221	0.0197887	0.0184099	0.0173741	0.0191507	0	0	0	0.0191202	0.0236717	0.0146406	0	0	0.0174992	0.0203002	0.0200923	0.0178507	0	0.0220156	0.0201062	0.0187161	0.0193752	0	0.0187174
0.0207776	0.0257713	0.0208858	0.0201161	0.0229157	0.0207647	0.0194121	0.018834	0.0240759	0.0222906	0.0201539	0.0227322	0	0.0178397	0.0206834	0.0218853	0.0199565	0.022515	0.0220784	0	0.0225549	0	0	0	0	0	0.020373	0.0244008	0.0202996	0.0188542	0.0233123	0	0	0	0.0206287	0.0267487	0.0168275	0	0	0.017297	0.0211695	0.0236486	0.0195256	0	0.0213839	0.0241338	0.0183199	0.0198798	0	0.0199926
0.0281874	0.0299195	0.0287744	0.0279037	0.0324615	0.0310281	0.0200381	0.0379068	0.0408571	0.0241734	0.0324608	0.0292054	0	0.0967911	0.0266794	0.0295976	0.0234736	0.0277924	0.0258334	0	0.0264855	0	0	0	0	0	0.0362527	0.0214893	0.022841	0.0240628	0.0252196	0	0	0	0.0324315	0.0470888	0.0245027	0	0	0.0161863	0.0199807	0.029064	0.0442309	0	0.0327731	0.0313062	0.0490097	0.0181648	0	0.035332
0.0257078	0.0243104	0.0255322	0.0177026	0.0581797	0.0206126	0.0201465	0.0224671	0.0179526	0.0182764	0.0177212	0.0177418	0	0.0136371	0.0191353	0.0180061	0.0167916	0.0240979	0.0251026	0	0.017945	0	0	0	0	0	0.0161131	0.0183829	0.0201833	0.0158379	0.0177844	0	0	0	0.0168263	0.0175057	0.0127983	0	0	0.0218105	0.0137813	0.0215737	0.0186864	0	0.0186397	0.0254728	0.0149336	0.0137536	0	0.0194529
0.0219127	0.0281226	0.0200822	0.0193454	0.0197919	0.0209293	0.0181064	0.0201291	0.0254538	0.0187706	0.0200034	0.0226197	0	0.0251576	0.0196141	0.0225687	0.018193	0.0193072	0.0185551	0	0.0184251	0	0	0	0	0	0.0191757	0.0212501	0.0182303	0.0219083	0.0194911	0	0	0	0.0187523	0.0235932	0.018381	0	0	0.016659	0.0170339	0.0221517	0.0239613	0	0.0200637	0.0230588	0.0197839	0.0168428	0	0.0220193
0.0202771	0.0239051	0.0201963	0.0186613	0.0228444	0.0190726	0.0191672	0.0193607	0.0250853	0.0209403	0.0194076	0.0225084	0	0.0183363	0.0189212	0.0192408	0.0185014	0.0233814	0.0227289	0	0.0193391	0	0	0	0	0	0.0196723	0.0204393	0.0191003	0.0187899	0.0214039	0	0	0	0.0200668	0.022732	0.0172535	0	0	0.0192684	0.0197189	0.0218051	0.018027	0	0.0228375	0.0231942	0.0181963	0.0202947	0	0.0279518
0.0208413	0.0223871	0.0196409	0.0194158	0.0207313	0.0183306	0.0199563	0.0188578	0.0229061	0.0200848	0.0211726	0.0232234	0	0.0211812	0.0193064	0.0221797	0.0184356	0.0200883	0.0192474	0	0.0183921	0	0	0	0	0	0.0194353	0.0191273	0.0186167	0.0197623	0.0200199	0	0	0	0.0194022	0.0259172	0.0173739	0	0	0.0154386	0.0202847	0.0196693	0.0193233	0	0.0192152	0.019716	0.019689	0.0175685	0	0.0197155
0.0241561	0.0249638	0.0238602	0.0236974	0.0201139	0.0195582	0.0190159	0.0181137	0.0213747	0.020565	0.0207245	0.0211254	0	0.0210912	0.0186224	0.0194265	0.0181264	0.0237278	0.0193777	0	0.0183516	0	0	0	0	0	0.0194717	0.0230287	0.0205739	0.0248405	0.0201495	0	0	0	0.0194121	0.0277026	0.0145734	0	0	0.0142834	0.0181714	0.0176235	0.0196681	0	0.0192461	0.0205515	0.0199657	0.0195242	0	0.0188674
0.0195215	0.023493	0.0199425	0.0193107	0.0208313	0.019273	0.018917	0.0219497	0.0232765	0.020037	0.0220836	0.0237938	0	0.019929	0.0203174	0.0203885	0.019761	0.0202925	0.0203081	0	0.0187877	0	0	0	0	0	0.0213012	0.0194244	0.0190876	0.022773	0.0220526	0	0	0	0.0255136	0.0303461	0.0216482	0	0	0.01711	0.02221	0.0199701	0.0203573	0	0.0212333	0.020819	0.0189183	0.0187562	0	0.0209325
0.0198319	0.0239857	0.0197073	0.019129	0.0204465	0.0181996	0.0191226	0.0215728	0.0223104	0.0211838	0.0203813	0.0225214	0	0.0166735	0.0195839	0.0193055	0.0189037	0.0213014	0.0202681	0	0.0205438	0	0	0	0	0	0.0189219	0.0198781	0.0224732	0.0188716	0.0208722	0	0	0	0.019567	0.0239164	0.0162825	0	0	0.0162588	0.0220909	0.0210573	0.0197279	0	0.0186354	0.0202409	0.0183177	0.0439061	0	0.0192174
0.0220263	0.0293753	0.0194704	0.0183515	0.0184957	0.0194066	0.0181473	0.0170955	0.0239937	0.0183806	0.0181894	0.0196138	0	0.0170241	0.0193629	0.0235456	0.0174254	0.0209334	0.0193313	0	0.017732	0	0	0	0	0	0.0172285	0.0212478	0.0183038	0.0180185	0.0196756	0	0	0	0.0168294	0.0225312	0.0139413	0	0	0.020093	0.0225394	0.0216512	0.0192034	0	0.0207404	0.021129	0.0161109	0.0185806	0	0.021032
0.0203784	0.0208337	0.0183782	0.0175141	0.0204456	0.0183057	0.016929	0.0173556	0.0198755	0.0176202	0.0181867	0.0188944	0	0.0207885	0.0190417	0.0225978	0.0168965	0.0180253	0.0172671	0	0.0203549	0	0	0	0	0	0.0179817	0.0249907	0.0178416	0.0203445	0.0194784	0	0	0	0.0182164	0.0262886	0.0174228	0	0	0.0136194	0.0191587	0.0186585	0.0165959	0	0.0184452	0.0197152	0.0176653	0.0175943	0	0.018764
0.0223425	0.0272699	0.0217343	0.0211506	0.0230489	0.0209371	0.0235275	0.0200992	0.0291027	0.0216263	0.0211821	0.0249192	0	0.0182154	0.021091	0.0214108	0.0197862	0.0225121	0.0224475	0	0.0218851	0	0	0	0	0	0.0210001	0.0276153	0.0238075	0.020711	0.0238512	0	0	0	0.0224437	0.027403	0.0176543	0	0	0.0166984	0.0215259	0.0210264	0.0209417	0	0.0212543	0.0233689	0.020452	0.019575	0	0.0206896
0.019564	0.0203511	0.01764	0.0170502	0.0194004	0.018667	0.0192937	0.0176212	0.0205834	0.0169232	0.0189075	0.0226363	0	0.0168552	0.0175578	0.0175808	0.0202475	0.0173258	0.0176826	0	0.016659	0	0	0	0	0	0.0217874	0.0187063	0.0179178	0.0208443	0.0172883	0	0	0	0.0166418	0.0221549	0.0193399	0	0	0.0139967	0.0168929	0.0165918	0.0172485	0	0.0173624	0.0179879	0.0233726	0.0157733	0	0.0180713
0.0185163	0.0183356	0.0169349	0.0162627	0.0188424	0.0172855	0.0191857	0.0163806	0.0194717	0.0162637	0.0183905	0.0203563	0	0.0161188	0.0161654	0.0167806	0.0174996	0.0167162	0.0174599	0	0.0163512	0	0	0	0	0	0.0187118	0.0179863	0.0172187	0.0180984	0.0169039	0	0	0	0.0163144	0.0207433	0.0177706	0	0	0.0140668	0.017033	0.0160975	0.0166065	0	0.0164353	0.0190959	0.0216158	0.0156498	0	0.0169915
0.0198388	0.0249629	0.0198846	0.019743	0.0209237	0.0197458	0.0189894	0.0185952	0.0246508	0.0198489	0.0203289	0.0219066	0	0.0176488	0.019874	0.0212582	0.0195029	0.0223271	0.0211573	0	0.0198463	0	0	0	0	0	0.0198231	0.020331	0.0225383	0.0201187	0.0202488	0	0	0	0.0199871	0.0239695	0.0175639	0	0	0.0168479	0.0203018	0.0210875	0.0182756	0	0.0211305	0.0210303	0.0211599	0.0189788	0	0.0197926
0.021584	0.0260716	0.0235234	0.0204791	0.0206081	0.0198424	0.0187564	0.019984	0.0266983	0.0231157	0.0195178	0.019341	0	0.0191714	0.0229447	0.0215827	0.019122	0.0275192	0.0213955	0	0.0205073	0	0	0	0	0	0.0262588	0.021267	0.0200954	0.0177749	0.0206278	0	0	0	0.0194245	0.0211281	0.0170937	0	0	0.0145336	0.0208863	0.0240267	0.0170552	0	0.0200597	0.0202022	0.0242274	0.0200596	0	0.0198606
0.018003	0.018223	0.0166742	0.0156385	0.016477	0.0189088	0.0158331	0.0167907	0.02898	0.0165162	0.0186523	0.0177665	0	0.0156912	0.0214017	0.0187173	0.0169774	0.0176717	0.0188625	0	0.0175368	0	0	0	0	0	0.0182703	0.0178547	0.0163771	0.01586	0.0195933	0	0	0	0.0201856	0.0415211	0.0204162	0	0	0.0124435	0.0212175	0.017618	0.0143202	0	0.0187344	0.0180078	0.0160922	0.0186488	0	0.0221737
0.020883	0.0262176	0.0214604	0.0187929	0.0206089	0.0193298	0.0186619	0.018737	0.0228587	0.0196779	0.0195358	0.0215967	0	0.0166811	0.0188197	0.0196435	0.018339	0.0201722	0.0195393	0	0.0191825	0	0	0	0	0	0.0207357	0.021063	0.0195797	0.0186958	0.0201432	0	0	0	0.0203168	0.0255447	0.0175747	0	0	0.0166107	0.0191757	0.0205571	0.0209195	0	0.0204023	0.0211998	0.0178326	0.0204102	0	0.0205942
0	0	0	0	0	0	0	0	0	0	0	0	0	0	0	0	0	0	0	0	0	0	0	0	0	0	0	0	0	0	0	0	0	0	0	0	0	0	0	0	0	0	0	0	0	0	0	0	0	0
0	0	0	0	0	0	0	0	0	0	0	0	0	0	0	0	0	0	0	0	0	0	0	0	0	0	0	0	0	0	0	0	0	0	0	0	0	0	0	0	0	0	0	0	0	0	0	0	0	0
0.0177384	0.0180758	0.0176696	0.0172115	0.0187904	0.0180837	0.0165594	0.0208707	0.0206953	0.0167875	0.0262903	0.0183573	0	0.033945	0.0173788	0.0181312	0.016816	0.017902	0.0173642	0	0.0175201	0	0	0	0	0	0.0196602	0.0171369	0.0173707	0.0171163	0.0168778	0	0	0	0.0186529	0.0222425	0.0152158	0	0	0.0126338	0.0140371	0.0188012	0.0202334	0	0.0188349	0.0184849	0.0239699	0.0143185	0	0.0218683
0.024499	0.025138	0.0249874	0.0243235	0.0338637	0.0268057	0.0285218	0.0206606	0.0222811	0.0196943	0.0194346	0.0253798	0	0.0195729	0.0223631	0.0197579	0.0183924	0.0216035	0.0291071	0	0.0185935	0	0	0	0	0	0.0193233	0.0214126	0.020788	0.0169049	0.019869	0	0	0	0.0202694	0.0326671	0.0141682	0	0	0.0144214	0.0239735	0.0182868	0.0266498	0	0.0196712	0.0237741	0.0199369	0.0197904	0	0.0239613
0	0	0	0	0	0	0	0	0	0	0	0	0	0	0	0	0	0	0	0	0	0	0	0	0	0	0	0	0	0	0	0	0	0	0	0	0	0	0	0	0	0	0	0	0	0	0	0	0	0
0.0176811	0.018052	0.0167412	0.0167026	0.0172752	0.0181699	0.0160488	0.0187285	0.0265644	0.0163144	0.0214535	0.0192073	0	0.0319956	0.0229698	0.0201946	0.0180111	0.0183094	0.0179898	0	0.0165563	0	0	0	0	0	0.0179304	0.017286	0.016631	0.0160006	0.0176034	0	0	0	0.0184237	0.0282087	0.0175911	0	0	0.0142245	0.017177	0.0178057	0.0232762	0	0.0221248	0.0205389	0.0225684	0.014743	0	0.0186901
0.0195911	0.0221729	0.0193253	0.0180765	0.0195057	0.0203094	0.0174094	0.0190033	0.0218297	0.0194433	0.0200278	0.0216503	0	0.0187496	0.0203838	0.0198207	0.0178821	0.0195703	0.0186845	0	0.0178645	0	0	0	0	0	0.020489	0.0193905	0.0177798	0.0258613	0.0187478	0	0	0	0.0186409	0.0273666	0.0239608	0	0	0.0139353	0.0182992	0.0190283	0.0197721	0	0.0208913	0.0192632	0.0212391	0.0166356	0	0.0199617
0.0203461	0.0259574	0.0202168	0.0210801	0.0201285	0.0185004	0.0184119	0.0180651	0.0189317	0.0227587	0.0213588	0.022933	0	0.0174336	0.0180815	0.0181434	0.0207819	0.0235076	0.0195261	0	0.0181152	0	0	0	0	0	0.0179048	0.0185326	0.0182707	0.0218043	0.0187367	0	0	0	0.0171991	0.0197108	0.0190879	0	0	0.0140744	0.0182509	0.0189938	0.0177448	0	0.0197673	0.0237636	0.0166679	0.0181749	0	0.0166589
0.0193202	0.0259945	0.0204367	0.0197554	0.0208068	0.0200121	0.0185645	0.0203768	0.0269337	0.0200115	0.0205045	0.0249052	0	0.0222602	0.0204612	0.0219435	0.018861	0.0205301	0.0193146	0	0.0203753	0	0	0	0	0	0.0211576	0.0204507	0.0192088	0.0213936	0.0198735	0	0	0	0.0206544	0.0283503	0.0183802	0	0	0.0154168	0.0213922	0.0216848	0.0202094	0	0.0207856	0.019836	0.0190457	0.0187462	0	0.0209118
0.0211431	0.0245371	0.0221061	0.0183562	0.023869	0.0195769	0.0178502	0.0233163	0.0260751	0.0213424	0.0217907	0.0245988	0	0.0193165	0.0220865	0.0211089	0.0183805	0.0204897	0.0199803	0	0.0225919	0	0	0	0	0	0.0233059	0.0292177	0.0235775	0.0418292	0.0203746	0	0	0	0.0190545	0.0316177	0.021345	0	0	0.0150437	0.0211268	0.0194216	0.0205657	0	0.0213578	0.020727	0.0201571	0.0176942	0	0.0337236
0.0239842	0.0232107	0.018044	0.0192854	0.0207159	0.0179424	0.0178778	0.0186906	0.0192016	0.0189718	0.0185277	0.0207451	0	0.0138243	0.0168844	0.0171143	0.0174447	0.0181889	0.0195115	0	0.0174295	0	0	0	0	0	0.0233901	0.0173339	0.0179333	0.0282692	0.0181583	0	0	0	0.0161393	0.030246	0.0281859	0	0	0.0195902	0.0188996	0.0190256	0.0165623	0	0.0177905	0.0182618	0.0158506	0.0164992	0	0.0203752
0.0119705	0.0119802	0.0115312	0.011896	0.0120145	0.0114549	0.0122361	0.0160503	0.0129068	0.0121975	0.012613	0.0123087	0	0.0113016	0.0111766	0.0116736	0.0115752	0.0118232	0.0120392	0	0.0111151	0	0	0	0	0	0.0570575	0.0109557	0.0133542	0.0123458	0.0113691	0	0	0	0.0122645	0.0134992	0.0328456	0	0	0.0169313	0.011244	0.0111483	0.0109391	0	0.0118302	0.0116643	0.0123097	0.0107727	0	0.0114257
0.0148234	0.0152387	0.0143783	0.0220268	0.0196101	0.0144135	0.01504	0.0173275	0.0157632	0.0199314	0.0153233	0.0150762	0	0.0145561	0.0138251	0.014448	0.0143238	0.0147454	0.0145929	0	0.0142241	0	0	0	0	0	0.043247	0.0135301	0.0155693	0.0184216	0.0145506	0	0	0	0.0149668	0.0165347	0.02983	0	0	0.0148454	0.014171	0.014631	0.0130605	0	0.0145842	0.0147018	0.0154363	0.013094	0	0.0146584
0.0184547	0.0258703	0.0186206	0.017921	0.0191578	0.0180774	0.0184059	0.0179363	0.018946	0.0195553	0.0179905	0.0180394	0	0.0135162	0.0193414	0.0179342	0.0176078	0.0184878	0.0176747	0	0.0184658	0	0	0	0	0	0.0267463	0.0209724	0.0205391	0.0245037	0.0194175	0	0	0	0.0177641	0.019278	0.0239262	0	0	0.0125734	0.0179291	0.0205771	0.021791	0	0.0176108	0.0182882	0.0163683	0.0194938	0	0.0181323
0.0206318	0.0238679	0.0202823	0.0193512	0.0205846	0.019594	0.0221059	0.0183331	0.0241405	0.0197629	0.0194625	0.0214129	0	0.0164123	0.0193387	0.0196107	0.0181679	0.0214105	0.0192019	0	0.0201	0	0	0	0	0	0.0198104	0.0235287	0.0217884	0.0197679	0.0206357	0	0	0	0.0246233	0.0240138	0.0183663	0	0	0.0148402	0.0194615	0.0204561	0.0178315	0	0.019322	0.0203212	0.0174546	0.01843	0	0.0187608
0	0	0	0	0	0	0	0	0	0	0	0	0	0	0	0	0	0	0	0	0	0	0	0	0	0	0	0	0	0	0	0	0	0	0	0	0	0	0	0	0	0	0	0	0	0	0	0	0	0
0.0159907	0.0208077	0.0165916	0.0161715	0.016115	0.0161716	0.0163127	0.0147202	0.0165535	0.0158718	0.0158366	0.0157795	0	0.0147527	0.0158489	0.0205684	0.015921	0.0164557	0.016009	0	0.016721	0	0	0	0	0	0.0149058	0.0170878	0.0168856	0.0135403	0.0167189	0	0	0	0.0172447	0.0165699	0.0119745	0	0	0.015416	0.0257584	0.0195496	0.0197874	0	0.0158566	0.0199667	0.0144269	0.0166927	0	0.0161155
0	0	0	0	0	0	0	0	0	0	0	0	0	0	0	0	0	0	0	0	0	0	0	0	0	0	0	0	0	0	0	0	0	0	0	0	0	0	0	0	0	0	0	0	0	0	0	0	0	0
0	0	0	0	0	0	0	0	0	0	0	0	0	0	0	0	0	0	0	0	0	0	0	0	0	0	0	0	0	0	0	0	0	0	0	0	0	0	0	0	0	0	0	0	0	0	0	0	0	0
0	0	0	0	0	0	0	0	0	0	0	0	0	0	0	0	0	0	0	0	0	0	0	0	0	0	0	0	0	0	0	0	0	0	0	0	0	0	0	0	0	0	0	0	0	0	0	0	0	0
0	0	0	0	0	0	0	0	0	0	0	0	0	0	0	0	0	0	0	0	0	0	0	0	0	0	0	0	0	0	0	0	0	0	0	0	0	0	0	0	0	0	0	0	0	0	0	0	0	0
0	0	0	0	0	0	0	0	0	0	0	0	0	0	0	0	0	0	0	0	0	0	0	0	0	0	0	0	0	0	0	0	0	0	0	0	0	0	0	0	0	0	0	0	0	0	0	0	0	0
0	0	0	0	0	0	0	0	0	0	0	0	0	0	0	0	0	0	0	0	0	0	0	0	0	0	0	0	0	0	0	0	0	0	0	0	0	0	0	0	0	0	0	0	0	0	0	0	0	0
0.0188809	0.0213776	0.0173182	0.0172189	0.0179186	0.0162234	0.015245	0.0200934	0.0721712	0.0168766	0.019561	0.0194306	0	0.0165481	0.0163333	0.0184439	0.0170769	0.0191076	0.017822	0	0.0189515	0	0	0	0	0	0.0224707	0.0267689	0.0165223	0.0263034	0.0193765	0	0	0	0.0274136	0.0793775	0.0161619	0	0	0.0128728	0.0335543	0.021041	0.0153574	0	0.0189493	0.0207383	0.0200285	0.0227495	0	0.0257135
0	0	0	0	0	0	0	0	0	0	0	0	0	0	0	0	0	0	0	0	0	0	0	0	0	0	0	0	0	0	0	0	0	0	0	0	0	0	0	0	0	0	0	0	0	0	0	0	0	0
0	0	0	0	0	0	0	0	0	0	0	0	0	0	0	0	0	0	0	0	0	0	0	0	0	0	0	0	0	0	0	0	0	0	0	0	0	0	0	0	0	0	0	0	0	0	0	0	0	0
0.0172686	0.0177979	0.0172797	0.0204032	0.0197595	0.0170394	0.0175407	0.0179978	0.0178599	0.0199522	0.01943	0.018315	0	0.0164267	0.0224944	0.0196682	0.0211193	0.0176302	0.0169191	0	0.0183941	0	0	0	0	0	0.0205282	0.0181744	0.0180898	0.0186156	0.017554	0	0	0	0.0183489	0.018289	0.0168535	0	0	0.0127457	0.0153074	0.0179481	0.0151252	0	0.0193379	0.0174814	0.0257958	0.018333	0	0.0211999
0.0145031	0.0147958	0.0146753	0.0139444	0.0139187	0.0138466	0.0145624	0.0127119	0.0146541	0.013986	0.0151077	0.0143971	0	0.0125676	0.0148228	0.0146335	0.0144775	0.0154311	0.0148814	0	0.0135437	0	0	0	0	0	0.0142433	0.0156669	0.0131599	0.0123204	0.0144979	0	0	0	0.0137925	0.0151157	0.0192524	0	0	0.0162449	0.0125636	0.0144215	0.0124855	0	0.0325823	0.0287139	0.0127436	0.0140369	0	0.0192635
0	0	0	0	0	0	0	0	0	0	0	0	0	0	0	0	0	0	0	0	0	0	0	0	0	0	0	0	0	0	0	0	0	0	0	0	0	0	0	0	0	0	0	0	0	0	0	0	0	0
0.0169927	0.0173196	0.015502	0.0164504	0.0174338	0.0161895	0.0170658	0.0180522	0.0184808	0.0171935	0.0179901	0.0206729	0	0.0220152	0.0157522	0.0225295	0.0176878	0.0178782	0.0168255	0	0.0155849	0	0	0	0	0	0.0176919	0.0158697	0.0158228	0.0318798	0.0166908	0	0	0	0.0163161	0.0198658	0.0308948	0	0	0.0119283	0.0160186	0.0174422	0.0152773	0	0.0183908	0.0175402	0.0182742	0.0138704	0	0.01612
0	0	0	0	0	0	0	0	0	0	0	0	0	0	0	0	0	0	0	0	0	0	0	0	0	0	0	0	0	0	0	0	0	0	0	0	0	0	0	0	0	0	0	0	0	0	0	0	0	0
0	0	0	0	0	0	0	0	0	0	0	0	0	0	0	0	0	0	0	0	0	0	0	0	0	0	0	0	0	0	0	0	0	0	0	0	0	0	0	0	0	0	0	0	0	0	0	0	0	0
0.0224375	0.02355	0.0203878	0.020934	0.0208328	0.0191495	0.0200429	0.0187043	0.0248878	0.019914	0.0225605	0.0223482	0	0.0189753	0.0195847	0.0210799	0.0184235	0.0210162	0.0199564	0	0.0185339	0	0	0	0	0	0.0196284	0.0196861	0.0183571	0.0188697	0.0208481	0	0	0	0.0197499	0.0232111	0.0160427	0	0	0.0180827	0.0182231	0.0203607	0.0185566	0	0.0198333	0.0199849	0.0182001	0.0179232	0	0.0192246
0.0168843	0.0174812	0.0166668	0.0159881	0.0171445	0.0165096	0.0176385	0.0184853	0.0185194	0.0165377	0.0170122	0.0171433	0	0.0216229	0.0164939	0.0167599	0.015823	0.040046	0.0227734	0	0.0170113	0	0	0	0	0	0.033417	0.0163181	0.0170377	0.0148261	0.0170895	0	0	0	0.0201863	0.0188982	0.0211599	0	0	0.0164428	0.0136672	0.0173047	0.0205933	0	0.0197801	0.0221556	0.0173909	0.0128515	0	0.0165928
0.0232549	0.0259272	0.0223262	0.0210748	0.0231805	0.0215558	0.0226841	0.0264791	0.025858	0.0222616	0.0214764	0.023472	0	0.0177984	0.0212524	0.0213336	0.0230693	0.0220091	0.0213686	0	0.0248256	0	0	0	0	0	0.0209375	0.0204132	0.021169	0.0191114	0.022666	0	0	0	0.0205692	0.0250479	0.0175924	0	0	0.0173745	0.0212507	0.0351831	0.0187423	0	0.0207281	0.0226672	0.018216	0.0198503	0	0.019877
0.0199035	0.022816	0.0198677	0.0181967	0.0191134	0.0192285	0.020487	0.0198717	0.0229249	0.0208501	0.019578	0.0220523	0	0.0177859	0.0194768	0.0201298	0.0230634	0.0197384	0.0181969	0	0.0198741	0	0	0	0	0	0.0182559	0.0193378	0.0184112	0.0197964	0.0192307	0	0	0	0.0192991	0.0247026	0.0187006	0	0	0.0150833	0.018649	0.0193462	0.018196	0	0.0183638	0.0193958	0.0180217	0.0180583	0	0.0194626
0.0215363	0.0271453	0.0211183	0.0212871	0.0210466	0.0206324	0.022161	0.0190809	0.0215637	0.0208673	0.0214007	0.0233126	0	0.0185388	0.0195238	0.0196643	0.0205702	0.0215724	0.0199895	0	0.0198563	0	0	0	0	0	0.0211696	0.0233097	0.0194919	0.0196501	0.0207314	0	0	0	0.0195172	0.0238934	0.0181245	0	0	0.018641	0.0205496	0.0210624	0.0199914	0	0.0193779	0.0208219	0.0177809	0.018109	0	0.0205656
0	0	0	0	0	0	0	0	0	0	0	0	0	0	0	0	0	0	0	0	0	0	0	0	0	0	0	0	0	0	0	0	0	0	0	0	0	0	0	0	0	0	0	0	0	0	0	0	0	0
0.0152037	0.0162577	0.0148685	0.0140071	0.0154427	0.0149875	0.0159262	0.0149056	0.0211238	0.0146139	0.0161128	0.0155248	0	0.0145791	0.0158942	0.0147661	0.0139491	0.0147321	0.0141803	0	0.0143737	0	0	0	0	0	0.016122	0.0159112	0.0147892	0.0174628	0.0165326	0	0	0	0.0151583	0.020092	0.0142343	0	0	0.0112702	0.0155729	0.0149863	0.0152312	0	0.0144583	0.0163496	0.0189972	0.0136901	0	0.0157914
0	0	0	0	0	0	0	0	0	0	0	0	0	0	0	0	0	0	0	0	0	0	0	0	0	0	0	0	0	0	0	0	0	0	0	0	0	0	0	0	0	0	0	0	0	0	0	0	0	0
0	0	0	0	0	0	0	0	0	0	0	0	0	0	0	0	0	0	0	0	0	0	0	0	0	0	0	0	0	0	0	0	0	0	0	0	0	0	0	0	0	0	0	0	0	0	0	0	0	0
0	0	0	0	0	0	0	0	0	0	0	0	0	0	0	0	0	0	0	0	0	0	0	0	0	0	0	0	0	0	0	0	0	0	0	0	0	0	0	0	0	0	0	0	0	0	0	0	0	0
0.0174611	0.0187471	0.0172724	0.0171089	0.0181657	0.0170654	0.0158894	0.017506	0.0215022	0.0231563	0.0185379	0.0209061	0	0.0262385	0.0166836	0.017473	0.0163748	0.0182357	0.0182128	0	0.0173585	0	0	0	0	0	0.0193483	0.0181199	0.0175087	0.0179791	0.0175437	0	0	0	0.0194118	0.0349894	0.0145821	0	0	0.0121283	0.0264796	0.0175304	0.0196989	0	0.0178785	0.0184485	0.0212076	0.0165122	0	0.0222447
0.0186684	0.0188867	0.0189727	0.0185785	0.0198504	0.0196264	0.0160096	0.0225033	0.0212542	0.0164646	0.0190783	0.0176391	0	0.0403053	0.0181723	0.0184787	0.0160356	0.0178367	0.0169307	0	0.0180742	0	0	0	0	0	0.0204789	0.0149433	0.0152353	0.0149833	0.0169384	0	0	0	0.0185321	0.0221973	0.0155243	0	0	0.0133766	0.0136742	0.0175306	0.0224472	0	0.0199782	0.0189831	0.0255748	0.0133642	0	0.0194418
0.0184098	0.0204349	0.0179806	0.0170649	0.0172213	0.0178233	0.0172899	0.0209597	0.0220143	0.017182	0.0173606	0.0213664	0	0.0145001	0.0168044	0.0175132	0.0191374	0.01781	0.0186519	0	0.017094	0	0	0	0	0	0.0187027	0.018415	0.0181313	0.0193898	0.0179639	0	0	0	0.0184298	0.0315926	0.0164585	0	0	0.0135879	0.0215254	0.0172646	0.0157101	0	0.0168957	0.0185529	0.0198878	0.0188509	0	0.0192221
0.0192581	0.0219248	0.019533	0.0179937	0.0182706	0.0176321	0.0183505	0.0246727	0.0234316	0.0182729	0.0182225	0.0229643	0	0.0139946	0.0174067	0.0177635	0.0211549	0.0187053	0.0181282	0	0.0180408	0	0	0	0	0	0.0200207	0.0193804	0.0193387	0.0213511	0.0189933	0	0	0	0.0195114	0.0252314	0.0179823	0	0	0.0140071	0.020335	0.0187282	0.0162395	0	0.0177751	0.0188977	0.0226883	0.0196303	0	0.0189533
0.0198683	0.0209062	0.0205219	0.0178007	0.0171741	0.0213983	0.0252985	0.0164049	0.0195072	0.0172968	0.0171898	0.0254522	0	0.0149045	0.0171298	0.0165854	0.0174179	0.0275971	0.0204785	0	0.0171447	0	0	0	0	0	0.0174138	0.0150195	0.018141	0.0176236	0.0173428	0	0	0	0.0184838	0.0324973	0.0134589	0	0	0.0125367	0.0304639	0.0177751	0.0160168	0	0.0176621	0.0177047	0.0195202	0.0196205	0	0.0190797
0.0239862	0.0189868	0.0188214	0.02071	0.0179283	0.0253143	0.0195306	0.017465	0.01835	0.0180629	0.0177276	0.0290669	0	0.0156379	0.0180178	0.0217156	0.0170716	0.0189605	0.0188122	0	0.0184182	0	0	0	0	0	0.0175997	0.0193891	0.0187992	0.0147351	0.0180656	0	0	0	0.0187152	0.0184514	0.0132164	0	0	0.023352	0.0199675	0.0179273	0.0144392	0	0.0182121	0.0216961	0.0164583	0.0186108	0	0.0188197
0.0170479	0.0168259	0.0169216	0.0152339	0.016023	0.0164397	0.0175316	0.0173135	0.0166904	0.0161259	0.0174746	0.0159926	0	0.0133882	0.0163514	0.0164454	0.016491	0.0179598	0.0169675	0	0.0168422	0	0	0	0	0	0.0145993	0.0194702	0.017306	0.0137549	0.0424282	0	0	0	0.018995	0.0165623	0.0132774	0	0	0.0213641	0.0137153	0.0211949	0.0251428	0	0.0444419	0.0415239	0.0133848	0.0131545	0	0.0165926
0.0208886	0.0219631	0.0191344	0.0170798	0.0202399	0.0193328	0.0201419	0.0181923	0.018935	0.0200863	0.0175919	0.0191997	0	0.0179637	0.0180259	0.0171029	0.0171017	0.0177678	0.0168389	0	0.0178764	0	0	0	0	0	0.016798	0.0180708	0.0184722	0.0211614	0.0178451	0	0	0	0.0185954	0.0186963	0.0137816	0	0	0.0137177	0.0192227	0.0190983	0.0247861	0	0.0172513	0.0198734	0.0169808	0.0172608	0	0.0205654
0	0	0	0	0	0	0	0	0	0	0	0	0	0	0	0	0	0	0	0	0	0	0	0	0	0	0	0	0	0	0	0	0	0	0	0	0	0	0	0	0	0	0	0	0	0	0	0	0	0
0	0	0	0	0	0	0	0	0	0	0	0	0	0	0	0	0	0	0	0	0	0	0	0	0	0	0	0	0	0	0	0	0	0	0	0	0	0	0	0	0	0	0	0	0	0	0	0	0	0
0.0198853	0.0275475	0.0198246	0.0188759	0.0233029	0.018942	0.0183496	0.0200047	0.0268988	0.0203807	0.0221762	0.0217337	0	0.0230662	0.0189725	0.0211189	0.0184567	0.020448	0.0197727	0	0.0202982	0	0	0	0	0	0.019657	0.0201755	0.0192343	0.0193818	0.0203448	0	0	0	0.019898	0.0223538	0.0172951	0	0	0.016704	0.0179677	0.0221095	0.0222111	0	0.0195926	0.0197756	0.0187388	0.0184572	0	0.0191839
0.0217039	0.0269505	0.0210756	0.0193504	0.0222865	0.0195621	0.0213655	0.020872	0.0242552	0.0216552	0.0200757	0.021804	0	0.0174873	0.0193306	0.0206654	0.0199386	0.0203501	0.0197007	0	0.0214801	0	0	0	0	0	0.020598	0.0217311	0.0244346	0.020323	0.0224212	0	0	0	0.0230325	0.0275223	0.0169822	0	0	0.01647	0.0220339	0.0218031	0.0189018	0	0.0210526	0.0225876	0.0180181	0.0205878	0	0.0207851
0	0	0	0	0	0	0	0	0	0	0	0	0	0	0	0	0	0	0	0	0	0	0	0	0	0	0	0	0	0	0	0	0	0	0	0	0	0	0	0	0	0	0	0	0	0	0	0	0	0
0.0181015	0.0190314	0.0179063	0.0168808	0.0184075	0.0174946	0.0181396	0.0184285	0.0184547	0.0180352	0.0180049	0.0177029	0	0.0177105	0.0185691	0.0181395	0.0169362	0.0177915	0.0177824	0	0.0189978	0	0	0	0	0	0.0169138	0.02008	0.0189218	0.016481	0.0190103	0	0	0	0.0169616	0.0183155	0.0141849	0	0	0.0183464	0.0139665	0.0201509	0.0222464	0	0.0176739	0.0245595	0.0169029	0.0146781	0	0.0174711
0.0238666	0.0293631	0.0236504	0.0242196	0.0270096	0.0217605	0.0218553	0.0200871	0.0261277	0.0246355	0.0239264	0.0256725	0	0.0176108	0.0226024	0.0232932	0.0227067	0.0248548	0.0255605	0	0.0246189	0	0	0	0	0	0.0229124	0.0242835	0.0251391	0.019425	0.0261956	0	0	0	0.0223748	0.0280557	0.017432	0	0	0.0170068	0.0219118	0.0250628	0.0194159	0	0.0223673	0.0238909	0.0208825	0.0205671	0	0.020304
0.0149858	0.0154593	0.0149744	0.0146631	0.0148629	0.014263	0.0152182	0.0150174	0.0158029	0.0149099	0.0163077	0.0163863	0	0.0130104	0.0148811	0.0150516	0.0144833	0.0161713	0.0202168	0	0.0146119	0	0	0	0	0	0.0152515	0.0164304	0.0142937	0.0130168	0.0155726	0	0	0	0.0155857	0.0156899	0.0150866	0	0	0.0152265	0.0143927	0.0142115	0.0159729	0	0.0260631	0.0241606	0.0146007	0.0185169	0	0.0162041
0	0	0	0	0	0	0	0	0	0	0	0	0	0	0	0	0	0	0	0	0	0	0	0	0	0	0	0	0	0	0	0	0	0	0	0	0	0	0	0	0	0	0	0	0	0	0	0	0	0
0	0	0	0	0	0	0	0	0	0	0	0	0	0	0	0	0	0	0	0	0	0	0	0	0	0	0	0	0	0	0	0	0	0	0	0	0	0	0	0	0	0	0	0	0	0	0	0	0	0
0.0233088	0.0386519	0.0252451	0.0232423	0.0249687	0.0245655	0.0182627	0.026395	0.0298394	0.020562	0.0243819	0.0232532	0	0.0553201	0.0213532	0.0227276	0.0211778	0.0229716	0.0218323	0	0.0209119	0	0	0	0	0	0.0272374	0.0196888	0.0206186	0.0172646	0.0214672	0	0	0	0.0240389	0.0542611	0.0188587	0	0	0.0138927	0.0237286	0.0236105	0.0282796	0	0.0244019	0.0241638	0.0320651	0.0188479	0	0.0302955
0.0186893	0.0201317	0.0181173	0.0185104	0.0178767	0.0173809	0.0177395	0.017177	0.0211218	0.0183308	0.0194295	0.0204426	0	0.0148105	0.0181714	0.0186271	0.017754	0.0191318	0.0182974	0	0.0187292	0	0	0	0	0	0.0203937	0.0175728	0.0193095	0.0147402	0.0194125	0	0	0	0.0212178	0.0499555	0.0142053	0	0	0.0129736	0.0243001	0.0155163	0.0143708	0	0.0176043	0.0198229	0.0175956	0.0313852	0	0.0267462
0.0281263	0.116808	0.0376464	0.0306855	0.0265696	0.0302852	0.0223501	0.0192321	0.0236343	0.0223305	0.0205941	0.020873	0	0.0129558	0.0208779	0.0199963	0.0246157	0.0227924	0.0204667	0	0.0213081	0	0	0	0	0	0.0181079	0.0292251	0.0264265	0.0139593	0.0255355	0	0	0	0.0146331	0.0222331	0.0128074	0	0	0.0137899	0.0154937	0.0347824	0.0151784	0	0.021788	0.021516	0.0136112	0.0142604	0	0.0279862
0.0178721	0.0252865	0.0258762	0.0179124	0.0176395	0.018071	0.0316817	0.0168315	0.0170879	0.0170456	0.0163961	0.0165202	0	0.0122656	0.0186616	0.0166851	0.016699	0.016922	0.0171759	0	0.0166537	0	0	0	0	0	0.0272101	0.0179004	0.0188954	0.0152526	0.017754	0	0	0	0.0160726	0.0168214	0.0173189	0	0	0.0119682	0.0173592	0.0184771	0.0180868	0	0.0162092	0.0168968	0.0157762	0.0150826	0	0.0163521
0	0	0	0	0	0	0	0	0	0	0	0	0	0	0	0	0	0	0	0	0	0	0	0	0	0	0	0	0	0	0	0	0	0	0	0	0	0	0	0	0	0	0	0	0	0	0	0	0	0
0	0	0	0	0	0	0	0	0	0	0	0	0	0	0	0	0	0	0	0	0	0	0	0	0	0	0	0	0	0	0	0	0	0	0	0	0	0	0	0	0	0	0	0	0	0	0	0	0	0
0.0221344	0.0175053	0.0178393	0.017131	0.0178691	0.0180961	0.0157473	0.0191563	0.0187825	0.0164715	0.0184178	0.0203845	0	0.0378309	0.0190021	0.0214696	0.0236384	0.0175152	0.0222971	0	0.0167623	0	0	0	0	0	0.0184363	0.0157011	0.016435	0.0165265	0.0167252	0	0	0	0.0178402	0.0202385	0.0146098	0	0	0.0130798	0.0137516	0.0169227	0.0265035	0	0.01786	0.0176946	0.0207846	0.0139956	0	0.0192551
0.0348081	0.0237484	0.0224769	0.0215997	0.0220847	0.0219465	0.0213433	0.0206442	0.0224342	0.021585	0.0338339	0.0211279	0	0.0153657	0.0211415	0.02173	0.0191387	0.0212724	0.0204445	0	0.020983	0	0	0	0	0	0.0205678	0.0270999	0.0223408	0.027772	0.0220182	0	0	0	0.0191221	0.0224242	0.0147531	0	0	0.0157649	0.0150177	0.0221122	0.0257522	0	0.0209845	0.022228	0.019906	0.0171511	0	0.0220359
0.0182291	0.0201043	0.0178804	0.0191971	0.0193915	0.0174116	0.0268416	0.0175541	0.0203756	0.0225463	0.0209578	0.0184574	0	0.0142196	0.0188508	0.0192724	0.0175731	0.0220063	0.0188972	0	0.018701	0	0	0	0	0	0.0189614	0.0207039	0.0186734	0.0173466	0.0196959	0	0	0	0.0190964	0.0212661	0.0192438	0	0	0.0186199	0.0157658	0.0192236	0.020411	0	0.0190452	0.0195139	0.0163535	0.019168	0	0.0188804
0.027017	0.0264498	0.0195596	0.018547	0.0185428	0.0200297	0.0171543	0.0167413	0.0197709	0.0170079	0.0181395	0.0175279	0	0.0254471	0.0164694	0.0169881	0.0167299	0.0179088	0.0169413	0	0.017298	0	0	0	0	0	0.0177	0.0167708	0.0180175	0.0165779	0.0170702	0	0	0	0.0180762	0.0202233	0.0137808	0	0	0.0223256	0.0177579	0.0176889	0.0172188	0	0.0181459	0.0185307	0.0206972	0.0154503	0	0.0260434
0.0209136	0.0236783	0.0207682	0.0223026	0.0220236	0.0207603	0.0187312	0.0258737	0.0723001	0.0197062	0.0223919	0.0239407	0	0.0348145	0.0212189	0.022698	0.0190873	0.021975	0.0210471	0	0.0224342	0	0	0	0	0	0.023953	0.0243024	0.0182639	0.0178121	0.0214062	0	0	0	0.0254593	0.0280294	0.0163876	0	0	0.0137763	0.0187495	0.0290749	0.0229153	0	0.0236799	0.0231861	0.0278439	0.0193728	0	0.0200642
0	0	0	0	0	0	0	0	0	0	0	0	0	0	0	0	0	0	0	0	0	0	0	0	0	0	0	0	0	0	0	0	0	0	0	0	0	0	0	0	0	0	0	0	0	0	0	0	0	0
0.0192772	0.0230175	0.0185824	0.0211773	0.0188922	0.0182351	0.0179256	0.0189044	0.0245962	0.0193789	0.0192995	0.0206063	0	0.0194211	0.0213789	0.0201184	0.0176185	0.0219294	0.0203844	0	0.018583	0	0	0	0	0	0.0183647	0.0197583	0.0181317	0.0191436	0.0210344	0	0	0	0.0200547	0.0240054	0.0164668	0	0	0.0170063	0.0183243	0.0203298	0.0223006	0	0.0205064	0.0207054	0.0185726	0.0195533	0	0.0204616
0	0	0	0	0	0	0	0	0	0	0	0	0	0	0	0	0	0	0	0	0	0	0	0	0	0	0	0	0	0	0	0	0	0	0	0	0	0	0	0	0	0	0	0	0	0	0	0	0	0
0.0201663	0.0254848	0.0199105	0.0196057	0.0244481	0.0192884	0.0219687	0.0190429	0.0258643	0.0207235	0.0193994	0.023911	0	0.0161609	0.0200964	0.0211033	0.0194115	0.0253176	0.0212787	0	0.0203861	0	0	0	0	0	0.018888	0.0205453	0.0207996	0.02011	0.0217229	0	0	0	0.0213757	0.0210911	0.0169932	0	0	0.0174149	0.0213319	0.0224114	0.0209054	0	0.021193	0.0232318	0.0186866	0.0222952	0	0.0206677
0.0167714	0.0183209	0.0170458	0.0171031	0.0200333	0.0164928	0.0169335	0.0169159	0.0174775	0.021035	0.0170377	0.0201215	0	0.0134353	0.0175348	0.0173975	0.0167687	0.0175902	0.017075	0	0.0178497	0	0	0	0	0	0.0165776	0.017703	0.0179614	0.0133575	0.0183353	0	0	0	0.0195786	0.0174884	0.0126296	0	0	0.0135996	0.0219386	0.0201024	0.0180185	0	0.0164189	0.0172646	0.0156283	0.0233825	0	0.0172383
0.0223153	0.0226894	0.0202281	0.0197923	0.0216393	0.0193087	0.0190704	0.0203369	0.0222261	0.0207669	0.020265	0.024176	0	0.0178673	0.0218351	0.0209901	0.0199789	0.0206109	0.0203093	0	0.0190895	0	0	0	0	0	0.0190045	0.0188028	0.0249569	0.021158	0.0198295	0	0	0	0.0199935	0.0266088	0.019901	0	0	0.0168302	0.0219338	0.0240472	0.019657	0	0.0205936	0.0208366	0.0196748	0.0198109	0	0.0198954
0.019438	0.0254016	0.0201251	0.0196044	0.021221	0.0213568	0.0186736	0.019161	0.0223361	0.0198068	0.0193698	0.0215504	0	0.0165903	0.0207777	0.0198965	0.0192965	0.019213	0.018847	0	0.0189254	0	0	0	0	0	0.0197221	0.0212744	0.019631	0.019608	0.0203561	0	0	0	0.0191812	0.0214278	0.0156577	0	0	0.0153402	0.0186235	0.0212581	0.0198631	0	0.0195539	0.0223188	0.0186951	0.0322695	0	0.0185632
0.0216391	0.0252106	0.0208416	0.0189535	0.0228737	0.0193974	0.0192609	0.0190658	0.0253861	0.0228322	0.0198999	0.0214644	0	0.0172593	0.020007	0.0209902	0.0193617	0.0222103	0.0210558	0	0.0199839	0	0	0	0	0	0.0195708	0.02429	0.0193598	0.019608	0.021384	0	0	0	0.0201243	0.0238815	0.0172901	0	0	0.015348	0.0203199	0.0251834	0.0193072	0	0.0203786	0.0209755	0.0179405	0.0184836	0	0.0196123
0.0146867	0.0157931	0.0142123	0.014404	0.0145836	0.0134371	0.0131298	0.0137026	0.0175783	0.0410272	0.0157319	0.0158897	0	0.014547	0.0144811	0.0139935	0.0147308	0.015427	0.0147727	0	0.0145101	0	0	0	0	0	0.0164568	0.0140348	0.0142923	0.0126663	0.0152358	0	0	0	0.0153816	0.051495	0.0135893	0	0	0.0114497	0.0246399	0.0127838	0.0126769	0	0.0137419	0.0151866	0.0146218	0.0186303	0	0.0194448
0	0	0	0	0	0	0	0	0	0	0	0	0	0	0	0	0	0	0	0	0	0	0	0	0	0	0	0	0	0	0	0	0	0	0	0	0	0	0	0	0	0	0	0	0	0	0	0	0	0
0	0	0	0	0	0	0	0	0	0	0	0	0	0	0	0	0	0	0	0	0	0	0	0	0	0	0	0	0	0	0	0	0	0	0	0	0	0	0	0	0	0	0	0	0	0	0	0	0	0
0.0160155	0.0161678	0.0163078	0.0155681	0.0165793	0.0160936	0.0147527	0.0169178	0.0184843	0.0153638	0.0172514	0.0163081	0	0.029555	0.0158432	0.0166639	0.0149904	0.0168817	0.0163575	0	0.0151436	0	0	0	0	0	0.0179174	0.0149783	0.0145022	0.0136758	0.0151958	0	0	0	0.0164663	0.0200855	0.0178544	0	0	0.0141003	0.0134217	0.0159153	0.0182413	0	0.0263833	0.0239111	0.0201814	0.0135016	0	0.0200362
0.0158608	0.0153902	0.0159274	0.0152398	0.0167108	0.0162833	0.0123214	0.019025	0.0195602	0.0137338	0.0169625	0.0153371	0	0.0416394	0.0146445	0.015767	0.0133471	0.0149857	0.0142412	0	0.0150146	0	0	0	0	0	0.018278	0.0152805	0.013056	0.0232702	0.0142039	0	0	0	0.0199456	0.0210702	0.0153417	0	0	0.0106622	0.0116393	0.0154116	0.0210562	0	0.0175785	0.0163079	0.0232836	0.0111007	0	0.0178169
0.0173618	0.0181514	0.0169281	0.0170289	0.0168796	0.0160908	0.0176792	0.0154349	0.0185164	0.0178448	0.0278992	0.0212339	0	0.0141718	0.016331	0.0171849	0.01663	0.0179943	0.0175211	0	0.0167163	0	0	0	0	0	0.0178992	0.0176445	0.0183541	0.0166068	0.017152	0	0	0	0.0170412	0.0189737	0.0138294	0	0	0.0211019	0.0177812	0.0164347	0.0138792	0	0.0171735	0.0178112	0.0174518	0.020966	0	0.0178151
0.0210754	0.02443	0.0210324	0.0206151	0.0216551	0.0201641	0.0205255	0.0191837	0.0242543	0.0229104	0.0227444	0.0659187	0	0.0151853	0.0212523	0.0219234	0.0269029	0.0244156	0.0232658	0	0.020707	0	0	0	0	0	0.021195	0.0222485	0.0211466	0.0232247	0.0216598	0	0	0	0.0246294	0.0255068	0.0147033	0	0	0.013483	0.032026	0.0234594	0.0153934	0	0.02089	0.0219535	0.0247931	0.0226771	0	0.0156064
0	0	0	0	0	0	0	0	0	0	0	0	0	0	0	0	0	0	0	0	0	0	0	0	0	0	0	0	0	0	0	0	0	0	0	0	0	0	0	0	0	0	0	0	0	0	0	0	0	0
0	0	0	0	0	0	0	0	0	0	0	0	0	0	0	0	0	0	0	0	0	0	0	0	0	0	0	0	0	0	0	0	0	0	0	0	0	0	0	0	0	0	0	0	0	0	0	0	0	0
0	0	0	0	0	0	0	0	0	0	0	0	0	0	0	0	0	0	0	0	0	0	0	0	0	0	0	0	0	0	0	0	0	0	0	0	0	0	0	0	0	0	0	0	0	0	0	0	0	0
0.0214096	0.0151291	0.0152477	0.0148024	0.014746	0.0292799	0.0147752	0.0160064	0.0155053	0.0141955	0.0146532	0.0146371	0	0.0220742	0.0335379	0.0226216	0.0143317	0.0153476	0.0245135	0	0.014075	0	0	0	0	0	0.0143756	0.0147436	0.0147897	0.0131123	0.0238134	0	0	0	0.0150599	0.016108	0.0158153	0	0	0.0132102	0.0128362	0.0162239	0.0169674	0	0.024211	0.0152143	0.0150463	0.0121478	0	0.0153301
0.0221792	0.0261659	0.0199316	0.0201781	0.0205786	0.0181887	0.0164118	0.0200931	0.0349583	0.0204376	0.0233025	0.0264592	0	0.0170604	0.0197007	0.0200645	0.0226575	0.0224115	0.0226608	0	0.0185842	0	0	0	0	0	0.0288397	0.0220366	0.022272	0.0175952	0.0239398	0	0	0	0.0276149	0.175089	0.01771	0	0	0.0141819	0.0692017	0.0160828	0.0162428	0	0.0189131	0.0254541	0.0194736	0.0413883	0	0.0457295
0	0	0	0	0	0	0	0	0	0	0	0	0	0	0	0	0	0	0	0	0	0	0	0	0	0	0	0	0	0	0	0	0	0	0	0	0	0	0	0	0	0	0	0	0	0	0	0	0	0
0	0	0	0	0	0	0	0	0	0	0	0	0	0	0	0	0	0	0	0	0	0	0	0	0	0	0	0	0	0	0	0	0	0	0	0	0	0	0	0	0	0	0	0	0	0	0	0	0	0
0	0	0	0	0	0	0	0	0	0	0	0	0	0	0	0	0	0	0	0	0	0	0	0	0	0	0	0	0	0	0	0	0	0	0	0	0	0	0	0	0	0	0	0	0	0	0	0	0	0
0.0173618	0.0181514	0.0169281	0.0170289	0.0168796	0.0160908	0.0176792	0.0154349	0.0185164	0.0178448	0.0278992	0.0212339	0	0.0141718	0.016331	0.0171849	0.01663	0.0179943	0.0175211	0	0.0167163	0	0	0	0	0	0.0178992	0.0176445	0.0183541	0.0166068	0.017152	0	0	0	0.0170412	0.0189737	0.0138294	0	0	0.0211019	0.0177812	0.0164347	0.0138792	0	0.0171735	0.0178112	0.0174518	0.020966	0	0.0178151
0.0236663	0.0301462	0.0220441	0.0217125	0.0238307	0.0220144	0.0208734	0.0243243	0.0907993	0.0242678	0.0275349	0.0229905	0	0.0180351	0.0191711	0.0249263	0.0201559	0.0248525	0.0199788	0	0.0231718	0	0	0	0	0	0.0274115	0.039589	0.0223638	0.033062	0.0251611	0	0	0	0.0251235	0.0327088	0.0175257	0	0	0.0142689	0.017575	0.0246539	0.041064	0	0.0239495	0.027064	0.0302729	0.0154445	0	0.0227434
0	0	0	0	0	0	0	0	0	0	0	0	0	0	0	0	0	0	0	0	0	0	0	0	0	0	0	0	0	0	0	0	0	0	0	0	0	0	0	0	0	0	0	0	0	0	0	0	0	0
0	0	0	0	0	0	0	0	0	0	0	0	0	0	0	0	0	0	0	0	0	0	0	0	0	0	0	0	0	0	0	0	0	0	0	0	0	0	0	0	0	0	0	0	0	0	0	0	0	0
0	0	0	0	0	0	0	0	0	0	0	0	0	0	0	0	0	0	0	0	0	0	0	0	0	0	0	0	0	0	0	0	0	0	0	0	0	0	0	0	0	0	0	0	0	0	0	0	0	0
0.0201446	0.0193763	0.0187531	0.0188593	0.0169407	0.0192298	0.016842	0.0164813	0.0176776	0.0170846	0.0177446	0.0208649	0	0.0200317	0.020621	0.0245528	0.0240533	0.0211127	0.0190275	0	0.0157327	0	0	0	0	0	0.0165434	0.0190051	0.0171229	0.0208787	0.0185053	0	0	0	0.0159253	0.0185821	0.0159491	0	0	0.0175366	0.0140955	0.0166121	0.0196966	0	0.0285377	0.0180048	0.0171184	0.0131838	0	0.0164873
0.0181248	0.014999	0.0146972	0.0143797	0.0144587	0.0222517	0.0144448	0.0158197	0.0150436	0.0142106	0.0148428	0.0148096	0	0.0180322	0.0248454	0.0195448	0.0148095	0.0159584	0.0202382	0	0.0144373	0	0	0	0	0	0.0142309	0.0157182	0.0145304	0.0132183	0.0197261	0	0	0	0.0171676	0.0155351	0.0143016	0	0	0.0154143	0.0124057	0.0163848	0.0148684	0	0.0363186	0.0159523	0.0147939	0.0117578	0	0.0162471
0.0166262	0.0184492	0.0151675	0.0151082	0.0154198	0.0176144	0.0151006	0.0158965	0.0157432	0.0154406	0.0156606	0.0170353	0	0.0191003	0.0192747	0.0222723	0.024444	0.0209002	0.018194	0	0.0145597	0	0	0	0	0	0.0150023	0.0164943	0.0147605	0.0185423	0.0171923	0	0	0	0.01497	0.0169383	0.0169639	0	0	0.0128885	0.0129872	0.0161891	0.0156263	0	0.0233906	0.0158674	0.0151043	0.0123159	0	0.0152891
0.0171184	0.0164727	0.0155314	0.0152065	0.0156038	0.0182957	0.0153195	0.0176112	0.0180313	0.0154533	0.0164294	0.0211533	0	0.0216961	0.0201306	0.0195736	0.0204614	0.0171085	0.0240533	0	0.0148235	0	0	0	0	0	0.023862	0.0146044	0.0157719	0.0158644	0.0176464	0	0	0	0.0169107	0.0333786	0.0174462	0	0	0.0130312	0.0207641	0.0158852	0.0184864	0	0.0180828	0.0163363	0.0165609	0.0163043	0	0.0186638
0.0214096	0.0151291	0.0152477	0.0148024	0.014746	0.0292799	0.0147752	0.0160064	0.0155053	0.0141955	0.0146532	0.0146371	0	0.0220742	0.0335379	0.0226216	0.0143317	0.0153476	0.0245135	0	0.014075	0	0	0	0	0	0.0143756	0.0147436	0.0147897	0.0131123	0.0238134	0	0	0	0.0150599	0.016108	0.0158153	0	0	0.0132102	0.0128362	0.0162239	0.0169674	0	0.024211	0.0152143	0.0150463	0.0121478	0	0.0153301
0.0195305	0.019548	0.0167175	0.016455	0.0174588	0.0216819	0.0168118	0.019063	0.0579934	0.0169645	0.0179498	0.0168386	0	0.0176755	0.023321	0.0208703	0.0160345	0.0181883	0.0201226	0	0.0181596	0	0	0	0	0	0.0184754	0.0219221	0.0173448	0.0168612	0.0212892	0	0	0	0.020579	0.0213391	0.0148656	0	0	0.0131114	0.0141416	0.021845	0.0154233	0	0.0215052	0.019049	0.0191369	0.0159744	0	0.0165711
0.0186582	0.0191936	0.017192	0.0170028	0.0170574	0.02213	0.0171619	0.0174021	0.0196176	0.0171074	0.0200509	0.0177638	0	0.0202244	0.0212268	0.0203311	0.0161207	0.0175449	0.018762	0	0.0166055	0	0	0	0	0	0.0168744	0.0188432	0.0177579	0.0174416	0.0190487	0	0	0	0.0168443	0.0186125	0.0141925	0	0	0.0162516	0.017357	0.017986	0.0174167	0	0.0196454	0.0228998	0.0169023	0.015982	0	0.0182184
0.0233329	0.0190771	0.0183036	0.0273834	0.018064	0.0179766	0.0184888	0.0165105	0.0263922	0.017861	0.0235293	0.0232736	0	0.0168748	0.0294644	0.024421	0.0172458	0.0182976	0.0183619	0	0.018941	0	0	0	0	0	0.0165618	0.0182897	0.0181777	0.0158057	0.0181287	0	0	0	0.0190459	0.0185017	0.0131911	0	0	0.0136548	0.0224474	0.0202084	0.0191466	0	0.0173312	0.0174945	0.0173388	0.0180551	0	0.0164143
0	0	0	0	0	0	0	0	0	0	0	0	0	0	0	0	0	0	0	0	0	0	0	0	0	0	0	0	0	0	0	0	0	0	0	0	0	0	0	0	0	0	0	0	0	0	0	0	0	0
0.0194669	0.0203854	0.0183214	0.0185564	0.0190029	0.0184988	0.0186308	0.018518	0.0207906	0.0193182	0.0275778	0.018843	0	0.0230185	0.0190482	0.019344	0.0173784	0.0189673	0.0182036	0	0.0181472	0	0	0	0	0	0.019143	0.0218248	0.0206516	0.0186834	0.0192385	0	0	0	0.019333	0.0208616	0.014206	0	0	0.0205368	0.0142857	0.018049	0.0170333	0	0.0193551	0.0201255	0.0189176	0.0187941	0	0.0197973
0	0	0	0	0	0	0	0	0	0	0	0	0	0	0	0	0	0	0	0	0	0	0	0	0	0	0	0	0	0	0	0	0	0	0	0	0	0	0	0	0	0	0	0	0	0	0	0	0	0
0.0153635	0.0160833	0.015437	0.0151014	0.0154881	0.0154922	0.0160321	0.0155708	0.017092	0.0154085	0.0240074	0.0185821	0	0.0197372	0.0345373	0.0238357	0.0343448	0.0162048	0.0159734	0	0.0153037	0	0	0	0	0	0.0157514	0.0159072	0.0162936	0.0155048	0.0153356	0	0	0	0.0158808	0.01743	0.0136405	0	0	0.0130186	0.0158143	0.0162417	0.0176734	0	0.0253405	0.0160584	0.0477006	0.0146185	0	0.0164589
0.0207006	0.0212382	0.0179351	0.0180714	0.0195127	0.0200927	0.0172061	0.0185453	0.0232566	0.0252347	0.022297	0.0208138	0	0.018027	0.023453	0.0216094	0.0218301	0.0250922	0.0210681	0	0.0170814	0	0	0	0	0	0.0211555	0.0217264	0.0191118	0.0341324	0.0211275	0	0	0	0.0178206	0.0535344	0.0266183	0	0	0.0130768	0.0249379	0.0158423	0.0160971	0	0.0229351	0.0207352	0.0249156	0.0189518	0	0.0213686
0.0256556	0.0290679	0.0236202	0.0212761	0.0254798	0.0223505	0.0217737	0.0203393	0.0298126	0.0269077	0.0293729	0.0247603	0	0.0198034	0.0176006	0.0246319	0.0215894	0.0247981	0.0201944	0	0.0207277	0	0	0	0	0	0.0275622	0.0370244	0.0278566	0.0528605	0.0240671	0	0	0	0.0165757	0.0330169	0.0191528	0	0	0.0140394	0.0166296	0.0165484	0.018116	0	0.0234523	0.0264101	0.0286316	0.016001	0	0.0177492
0.0145334	0.0153852	0.0145805	0.0141015	0.0145626	0.0137497	0.0146532	0.0155219	0.0170212	0.0277685	0.0166636	0.0160567	0	0.0140578	0.0147562	0.0143436	0.0142914	0.0150499	0.0146843	0	0.0144907	0	0	0	0	0	0.0282333	0.0145514	0.0150715	0.0157535	0.0150543	0	0	0	0.0146162	0.0341563	0.0235233	0	0	0.0113735	0.018913	0.0133437	0.0145335	0	0.0140761	0.0150733	0.0363768	0.0154788	0	0.0172654
0	0	0	0	0	0	0	0	0	0	0	0	0	0	0	0	0	0	0	0	0	0	0	0	0	0	0	0	0	0	0	0	0	0	0	0	0	0	0	0	0	0	0	0	0	0	0	0	0	0
0.0203862	0.0442228	0.0227442	0.0199076	0.0204541	0.0202086	0.0193306	0.0210615	0.0197104	0.0183254	0.0183806	0.0189999	0	0.0136946	0.0200372	0.0180958	0.0195001	0.0186432	0.0180474	0	0.0193865	0	0	0	0	0	0.0173516	0.0211344	0.019826	0.0207047	0.0199365	0	0	0	0.0180348	0.0198356	0.0133258	0	0	0.0125744	0.0143334	0.0229835	0.0254912	0	0.0185567	0.0191717	0.0175174	0.0134012	0	0.0208398
0	0	0	0	0	0	0	0	0	0	0	0	0	0	0	0	0	0	0	0	0	0	0	0	0	0	0	0	0	0	0	0	0	0	0	0	0	0	0	0	0	0	0	0	0	0	0	0	0	0
0	0	0	0	0	0	0	0	0	0	0	0	0	0	0	0	0	0	0	0	0	0	0	0	0	0	0	0	0	0	0	0	0	0	0	0	0	0	0	0	0	0	0	0	0	0	0	0	0	0
0	0	0	0	0	0	0	0	0	0	0	0	0	0	0	0	0	0	0	0	0	0	0	0	0	0	0	0	0	0	0	0	0	0	0	0	0	0	0	0	0	0	0	0	0	0	0	0	0	0
0	0	0	0	0	0	0	0	0	0	0	0	0	0	0	0	0	0	0	0	0	0	0	0	0	0	0	0	0	0	0	0	0	0	0	0	0	0	0	0	0	0	0	0	0	0	0	0	0	0
0.0186466	0.0228315	0.0187898	0.0209977	0.0204707	0.0178104	0.0176519	0.0180484	0.0191414	0.0186782	0.0197588	0.0232469	0	0.0182249	0.0202206	0.0194611	0.017775	0.0190915	0.0204293	0	0.0181461	0	0	0	0	0	0.0176739	0.0178753	0.0181269	0.0181835	0.0204302	0	0	0	0.0198979	0.0239111	0.0170596	0	0	0.0143949	0.0200582	0.0198692	0.0185305	0	0.0178025	0.0183792	0.0173083	0.0179892	0	0.0187687
0	0	0	0	0	0	0	0	0	0	0	0	0	0	0	0	0	0	0	0	0	0	0	0	0	0	0	0	0	0	0	0	0	0	0	0	0	0	0	0	0	0	0	0	0	0	0	0	0	0
0.0209897	0.0226314	0.0193916	0.0193649	0.0191415	0.0183006	0.0186573	0.0176526	0.0218984	0.0191407	0.0216574	0.0214459	0	0.0177934	0.0201841	0.0192628	0.0185767	0.0259013	0.0208121	0	0.0198039	0	0	0	0	0	0.017816	0.0198499	0.0189858	0.0152154	0.0199384	0	0	0	0.0206076	0.0199303	0.0156693	0	0	0.0186197	0.0241496	0.0225147	0.0208786	0	0.0193079	0.0196245	0.0182769	0.0195233	0	0.019657
0	0	0	0	0	0	0	0	0	0	0	0	0	0	0	0	0	0	0	0	0	0	0	0	0	0	0	0	0	0	0	0	0	0	0	0	0	0	0	0	0	0	0	0	0	0	0	0	0	0
0	0	0	0	0	0	0	0	0	0	0	0	0	0	0	0	0	0	0	0	0	0	0	0	0	0	0	0	0	0	0	0	0	0	0	0	0	0	0	0	0	0	0	0	0	0	0	0	0	0
0.0180974	0.0198169	0.0187171	0.0175084	0.0195883	0.0183459	0.0154237	0.0220294	0.0441158	0.0170816	0.0200325	0.0186648	0	0.0331636	0.0176356	0.0190393	0.0164355	0.0182637	0.0176679	0	0.0185863	0	0	0	0	0	0.0227122	0.0208756	0.0166891	0.0215669	0.0176279	0	0	0	0.0211669	0.0341395	0.0162846	0	0	0.0127597	0.0177301	0.0205371	0.0204517	0	0.0199801	0.0197111	0.0240921	0.0160936	0	0.0271504
0.0207559	0.02164	0.0200189	0.0192351	0.0211666	0.0187699	0.0204701	0.0218447	0.0208711	0.0208805	0.0200192	0.0197287	0	0.0240116	0.0206695	0.020429	0.0199992	0.0200913	0.0208713	0	0.0217659	0	0	0	0	0	0.0187485	0.022493	0.0209008	0.0142421	0.0223675	0	0	0	0.0197301	0.0204075	0.0185435	0	0	0.0251551	0.0148756	0.027724	0.0278203	0	0.0210902	0.0293295	0.0171743	0.0228912	0	0.0178644
0.0190436	0.0246027	0.0190723	0.025632	0.0190519	0.0186884	0.0205284	0.0187086	0.0227073	0.0188324	0.0235891	0.0208316	0	0.0222126	0.0183286	0.0232474	0.0176694	0.0204121	0.0183821	0	0.0180905	0	0	0	0	0	0.020141	0.0202361	0.0184249	0.0193462	0.0189654	0	0	0	0.019013	0.0207928	0.018242	0	0	0.0205677	0.0166974	0.019106	0.0194011	0	0.0231834	0.0216475	0.0188303	0.0163658	0	0.0202322
0	0	0	0	0	0	0	0	0	0	0	0	0	0	0	0	0	0	0	0	0	0	0	0	0	0	0	0	0	0	0	0	0	0	0	0	0	0	0	0	0	0	0	0	0	0	0	0	0	0
0.0185216	0.0197132	0.0180063	0.0172961	0.0188743	0.0172854	0.0189164	0.0192586	0.0195475	0.0185299	0.0182626	0.0186675	0	0.0140416	0.0190328	0.0187025	0.0189452	0.0189439	0.0190898	0	0.0187544	0	0	0	0	0	0.0174106	0.0206572	0.0170007	0.015795	0.0200456	0	0	0	0.0195494	0.0285029	0.0131689	0	0	0.0167696	0.0174733	0.0242618	0.0188996	0	0.0261271	0.0262606	0.0156901	0.0180337	0	0.0187075
0.0232724	0.0267388	0.0236388	0.0208217	0.0234702	0.0206983	0.0206506	0.019825	0.0208248	0.0213922	0.0202866	0.0255767	0	0.0156927	0.0203102	0.0235347	0.0206231	0.0216792	0.021121	0	0.0208969	0	0	0	0	0	0.0191904	0.0206137	0.0213322	0.0201969	0.021378	0	0	0	0.0222909	0.0214677	0.0171117	0	0	0.0190024	0.0275644	0.0239323	0.0169915	0	0.0204517	0.0239014	0.018081	0.0223762	0	0.0197044
0	0	0	0	0	0	0	0	0	0	0	0	0	0	0	0	0	0	0	0	0	0	0	0	0	0	0	0	0	0	0	0	0	0	0	0	0	0	0	0	0	0	0	0	0	0	0	0	0	0
0	0	0	0	0	0	0	0	0	0	0	0	0	0	0	0	0	0	0	0	0	0	0	0	0	0	0	0	0	0	0	0	0	0	0	0	0	0	0	0	0	0	0	0	0	0	0	0	0	0
0	0	0	0	0	0	0	0	0	0	0	0	0	0	0	0	0	0	0	0	0	0	0	0	0	0	0	0	0	0	0	0	0	0	0	0	0	0	0	0	0	0	0	0	0	0	0	0	0	0
0	0	0	0	0	0	0	0	0	0	0	0	0	0	0	0	0	0	0	0	0	0	0	0	0	0	0	0	0	0	0	0	0	0	0	0	0	0	0	0	0	0	0	0	0	0	0	0	0	0
0	0	0	0	0	0	0	0	0	0	0	0	0	0	0	0	0	0	0	0	0	0	0	0	0	0	0	0	0	0	0	0	0	0	0	0	0	0	0	0	0	0	0	0	0	0	0	0	0	0
0	0	0	0	0	0	0	0	0	0	0	0	0	0	0	0	0	0	0	0	0	0	0	0	0	0	0	0	0	0	0	0	0	0	0	0	0	0	0	0	0	0	0	0	0	0	0	0	0	0
0	0	0	0	0	0	0	0	0	0	0	0	0	0	0	0	0	0	0	0	0	0	0	0	0	0	0	0	0	0	0	0	0	0	0	0	0	0	0	0	0	0	0	0	0	0	0	0	0	0
0	0	0	0	0	0	0	0	0	0	0	0	0	0	0	0	0	0	0	0	0	0	0	0	0	0	0	0	0	0	0	0	0	0	0	0	0	0	0	0	0	0	0	0	0	0	0	0	0	0
0.0177176	0.0199636	0.0182052	0.0165103	0.0177214	0.0177195	0.0199134	0.0175727	0.0212327	0.0174822	0.0175341	0.017192	0	0.0140286	0.0174588	0.0176748	0.0173231	0.0175588	0.0167651	0	0.0174715	0	0	0	0	0	0.0175505	0.0242621	0.0169155	0.0145455	0.018791	0	0	0	0.0164456	0.0190775	0.0137065	0	0	0.0125217	0.0144323	0.0141566	0.0296055	0	0.0170242	0.0183298	0.0185204	0.0134401	0	0.0253832
0	0	0	0	0	0	0	0	0	0	0	0	0	0	0	0	0	0	0	0	0	0	0	0	0	0	0	0	0	0	0	0	0	0	0	0	0	0	0	0	0	0	0	0	0	0	0	0	0	0
0	0	0	0	0	0	0	0	0	0	0	0	0	0	0	0	0	0	0	0	0	0	0	0	0	0	0	0	0	0	0	0	0	0	0	0	0	0	0	0	0	0	0	0	0	0	0	0	0	0
0.0214096	0.0151291	0.0152477	0.0148024	0.014746	0.0292799	0.0147752	0.0160064	0.0155053	0.0141955	0.0146532	0.0146371	0	0.0220742	0.0335379	0.0226216	0.0143317	0.0153476	0.0245135	0	0.014075	0	0	0	0	0	0.0143756	0.0147436	0.0147897	0.0131123	0.0238134	0	0	0	0.0150599	0.016108	0.0158153	0	0	0.0132102	0.0128362	0.0162239	0.0169674	0	0.024211	0.0152143	0.0150463	0.0121478	0	0.0153301
0.0189458	0.019312	0.0275682	0.0172006	0.0199704	0.0197956	0.016349	0.0240549	0.0213535	0.0175129	0.0195693	0.0196272	0	0.0313423	0.0198204	0.018898	0.0169729	0.0182378	0.0181135	0	0.0192536	0	0	0	0	0	0.020322	0.0195901	0.0174162	0.0252162	0.0183564	0	0	0	0.0196942	0.0229301	0.0153019	0	0	0.012547	0.0245295	0.0207223	0.023016	0	0.0192982	0.0192406	0.0222273	0.0133367	0	0.0249682
0	0	0	0	0	0	0	0	0	0	0	0	0	0	0	0	0	0	0	0	0	0	0	0	0	0	0	0	0	0	0	0	0	0	0	0	0	0	0	0	0	0	0	0	0	0	0	0	0	0
0.0180885	0.0204547	0.0175716	0.0171349	0.0171983	0.0163045	0.0162022	0.0164563	0.0224482	0.0177716	0.018437	0.0246596	0	0.014136	0.0172249	0.0179446	0.0194549	0.0297586	0.0321245	0	0.0178821	0	0	0	0	0	0.020495	0.0165849	0.0172649	0.0142961	0.0190495	0	0	0	0.0212319	0.0682881	0.0140403	0	0	0.0127599	0.0354506	0.0168907	0.0140144	0	0.0184963	0.0195589	0.0160109	0.0238561	0	0.0234399
0.0173618	0.0181514	0.0169281	0.0170289	0.0168796	0.0160908	0.0176792	0.0154349	0.0185164	0.0178448	0.0278992	0.0212339	0	0.0141718	0.016331	0.0171849	0.01663	0.0179943	0.0175211	0	0.0167163	0	0	0	0	0	0.0178992	0.0176445	0.0183541	0.0166068	0.017152	0	0	0	0.0170412	0.0189737	0.0138294	0	0	0.0211019	0.0177812	0.0164347	0.0138792	0	0.0171735	0.0178112	0.0174518	0.020966	0	0.0178151
0	0	0	0	0	0	0	0	0	0	0	0	0	0	0	0	0	0	0	0	0	0	0	0	0	0	0	0	0	0	0	0	0	0	0	0	0	0	0	0	0	0	0	0	0	0	0	0	0	0
0.0126915	0.0134495	0.0136817	0.012022	0.0131608	0.0122583	0.0132562	0.0182319	0.0175126	0.0126202	0.0140491	0.0135545	0	0.0584809	0.0130851	0.0135938	0.011721	0.0126813	0.0130186	0	0.0123606	0	0	0	0	0	0.0200564	0.0158511	0.0132995	0.0138267	0.0134007	0	0	0	0.0125205	0.0175585	0.0567061	0	0	0.0102208	0.0121603	0.0122066	0.0129923	0	0.0135707	0.0130646	0.0142254	0.0115807	0	0.0132386
0.0223334	0.0247379	0.0198665	0.0197813	0.0215338	0.0191156	0.0199626	0.0182582	0.0237318	0.0231097	0.0217163	0.0272808	0	0.0140043	0.024387	0.019799	0.0202137	0.0219793	0.0206904	0	0.0202931	0	0	0	0	0	0.0183629	0.0213358	0.0203082	0.0168606	0.0224313	0	0	0	0.0217329	0.0245817	0.0153235	0	0	0.0164629	0.0240131	0.0234162	0.0168078	0	0.019096	0.0201035	0.0178312	0.0217037	0	0.0187211
0.0225053	0.025761	0.0213205	0.0197792	0.0210834	0.0192067	0.0182397	0.0195626	0.0232049	0.0196266	0.0210499	0.0272854	0	0.0215807	0.0207763	0.0202899	0.0194318	0.0201731	0.0193777	0	0.0195217	0	0	0	0	0	0.019612	0.0197511	0.0187932	0.0225869	0.0195266	0	0	0	0.0255651	0.0251898	0.020933	0	0	0.0156709	0.0201354	0.0236583	0.0196339	0	0.0195578	0.0209138	0.0186441	0.0173707	0	0.0199928
0	0	0	0	0	0	0	0	0	0	0	0	0	0	0	0	0	0	0	0	0	0	0	0	0	0	0	0	0	0	0	0	0	0	0	0	0	0	0	0	0	0	0	0	0	0	0	0	0	0
0	0	0	0	0	0	0	0	0	0	0	0	0	0	0	0	0	0	0	0	0	0	0	0	0	0	0	0	0	0	0	0	0	0	0	0	0	0	0	0	0	0	0	0	0	0	0	0	0	0
0	0	0	0	0	0	0	0	0	0	0	0	0	0	0	0	0	0	0	0	0	0	0	0	0	0	0	0	0	0	0	0	0	0	0	0	0	0	0	0	0	0	0	0	0	0	0	0	0	0
0	0	0	0	0	0	0	0	0	0	0	0	0	0	0	0	0	0	0	0	0	0	0	0	0	0	0	0	0	0	0	0	0	0	0	0	0	0	0	0	0	0	0	0	0	0	0	0	0	0
0.0198209	0.0221825	0.0190244	0.0173511	0.0206455	0.0180988	0.0180707	0.0196759	0.0551087	0.0199673	0.0204511	0.0194627	0	0.0152615	0.0179012	0.0198526	0.0168993	0.0192747	0.017929	0	0.0202565	0	0	0	0	0	0.0205793	0.0261703	0.0185869	0.0235663	0.0200496	0	0	0	0.0199495	0.0244115	0.0148081	0	0	0.0132444	0.0154215	0.0219226	0.0284281	0	0.01966	0.0216806	0.0245366	0.0143222	0	0.0202816
0.0206584	0.0220301	0.0207225	0.0176742	0.0197779	0.0196061	0.0184625	0.0185942	0.0295411	0.018355	0.018427	0.0188559	0	0.0137947	0.018579	0.0187412	0.0183026	0.0191316	0.0184416	0	0.0192227	0	0	0	0	0	0.0177811	0.0211413	0.0180779	0.017198	0.0198549	0	0	0	0.020279	0.0243675	0.0145234	0	0	0.0157062	0.0228343	0.022712	0.0186136	0	0.0213131	0.0214253	0.0163593	0.0179049	0	0.0183197
0	0	0	0	0	0	0	0	0	0	0	0	0	0	0	0	0	0	0	0	0	0	0	0	0	0	0	0	0	0	0	0	0	0	0	0	0	0	0	0	0	0	0	0	0	0	0	0	0	0
0	0	0	0	0	0	0	0	0	0	0	0	0	0	0	0	0	0	0	0	0	0	0	0	0	0	0	0	0	0	0	0	0	0	0	0	0	0	0	0	0	0	0	0	0	0	0	0	0	0
0	0	0	0	0	0	0	0	0	0	0	0	0	0	0	0	0	0	0	0	0	0	0	0	0	0	0	0	0	0	0	0	0	0	0	0	0	0	0	0	0	0	0	0	0	0	0	0	0	0
0	0	0	0	0	0	0	0	0	0	0	0	0	0	0	0	0	0	0	0	0	0	0	0	0	0	0	0	0	0	0	0	0	0	0	0	0	0	0	0	0	0	0	0	0	0	0	0	0	0
0.0144225	0.014859	0.0133283	0.014245	0.0148641	0.0133287	0.0140786	0.0153581	0.0149527	0.0149211	0.0144188	0.0149147	0	0.0128162	0.0140195	0.0143073	0.0139416	0.0146073	0.0139303	0	0.0144081	0	0	0	0	0	0.0141555	0.0139346	0.0135959	0.0278357	0.0151916	0	0	0	0.0134394	0.0160202	0.0281728	0	0	0.0110313	0.0125319	0.0144576	0.0127304	0	0.0151569	0.0148913	0.0151076	0.0119238	0	0.0128029
0.0222969	0.0210805	0.0192368	0.0191959	0.019922	0.018782	0.0192994	0.0186226	0.0206527	0.0196929	0.0237982	0.0222149	0	0.0190365	0.0189951	0.0240367	0.0192106	0.0200006	0.0210823	0	0.0194421	0	0	0	0	0	0.0191625	0.0192902	0.0202163	0.0204671	0.023195	0	0	0	0.0216949	0.0282099	0.0189268	0	0	0.0175774	0.0204485	0.0203269	0.0225019	0	0.0208495	0.0214606	0.0176474	0.022438	0	0.0186733
0.0162259	0.0177467	0.0162932	0.0159163	0.0168302	0.0159081	0.0167736	0.0157815	0.0284087	0.0165201	0.0166215	0.0204592	0	0.0160239	0.0163822	0.0218703	0.0164302	0.0177848	0.0218506	0	0.0178692	0	0	0	0	0	0.0163299	0.0180077	0.0171781	0.0159513	0.0172091	0	0	0	0.0186945	0.0180549	0.0130248	0	0	0.0141364	0.0193425	0.0184952	0.0167644	0	0.0216793	0.0205794	0.0165223	0.0176107	0	0.0171262
0.0185545	0.0212896	0.0174087	0.0173087	0.0186106	0.0178563	0.0182587	0.0195322	0.0800515	0.0183815	0.0186404	0.0185827	0	0.0140058	0.0188443	0.0195474	0.0171552	0.0206551	0.0179844	0	0.0221522	0	0	0	0	0	0.0200881	0.0231542	0.0179133	0.0147075	0.0198289	0	0	0	0.0271093	0.0236257	0.0142187	0	0	0.0134103	0.0154614	0.0227874	0.01445	0	0.0204465	0.0213117	0.0223705	0.0216371	0	0.0234063
0	0	0	0	0	0	0	0	0	0	0	0	0	0	0	0	0	0	0	0	0	0	0	0	0	0	0	0	0	0	0	0	0	0	0	0	0	0	0	0	0	0	0	0	0	0	0	0	0	0
0.016027	0.0169023	0.0159395	0.0150016	0.0159309	0.015174	0.0160573	0.0143556	0.0171049	0.016357	0.0161747	0.0205445	0	0.0134273	0.0159032	0.0160811	0.0160762	0.0180092	0.0304469	0	0.016114	0	0	0	0	0	0.0149757	0.0157803	0.016146	0.0135101	0.0170202	0	0	0	0.0180935	0.0166653	0.0128567	0	0	0.0175446	0.0180828	0.0157055	0.0224685	0	0.0305625	0.0276532	0.0151776	0.0195803	0	0.0161687
0	0	0	0	0	0	0	0	0	0	0	0	0	0	0	0	0	0	0	0	0	0	0	0	0	0	0	0	0	0	0	0	0	0	0	0	0	0	0	0	0	0	0	0	0	0	0	0	0	0
0.0255483	0.0298202	0.023677	0.0227817	0.0246586	0.021853	0.0229866	0.0214277	0.0267449	0.0248158	0.0226226	0.0254738	0	0.0182118	0.0253884	0.0254717	0.0228529	0.0249542	0.0247154	0	0.0230016	0	0	0	0	0	0.0218701	0.0295298	0.023431	0.019659	0.0260431	0	0	0	0.0222237	0.0284087	0.0173407	0	0	0.0181095	0.0223487	0.0301533	0.0200442	0	0.0247228	0.025387	0.0184606	0.0279669	0	0.0206551
0.0178725	0.0303593	0.0181022	0.0173073	0.0170168	0.016823	0.0160173	0.014822	0.0187966	0.016838	0.0169456	0.0169969	0	0.0122984	0.0164366	0.0161288	0.0165254	0.016975	0.0162435	0	0.0158146	0	0	0	0	0	0.0165339	0.0189302	0.0176901	0.0150341	0.0176595	0	0	0	0.0163554	0.0370475	0.0124799	0	0	0.011673	0.0196978	0.0172606	0.017404	0	0.0161954	0.0178067	0.0148424	0.0188819	0	0.0206452
0.0145031	0.0147958	0.0146753	0.0139444	0.0139187	0.0138466	0.0145624	0.0127119	0.0146541	0.013986	0.0151077	0.0143971	0	0.0125676	0.0148228	0.0146335	0.0144775	0.0154311	0.0148814	0	0.0135437	0	0	0	0	0	0.0142433	0.0156669	0.0131599	0.0123204	0.0144979	0	0	0	0.0137925	0.0151157	0.0192524	0	0	0.0162449	0.0125636	0.0144215	0.0124855	0	0.0325823	0.0287139	0.0127436	0.0140369	0	0.0192635
0	0	0	0	0	0	0	0	0	0	0	0	0	0	0	0	0	0	0	0	0	0	0	0	0	0	0	0	0	0	0	0	0	0	0	0	0	0	0	0	0	0	0	0	0	0	0	0	0	0
0	0	0	0	0	0	0	0	0	0	0	0	0	0	0	0	0	0	0	0	0	0	0	0	0	0	0	0	0	0	0	0	0	0	0	0	0	0	0	0	0	0	0	0	0	0	0	0	0	0
0.0338826	0.0176705	0.0179281	0.0171489	0.0167401	0.0186473	0.0538563	0.0158873	0.0177477	0.0170227	0.0171125	0.0162889	0	0.0137628	0.0159202	0.0163872	0.0149966	0.0166456	0.015333	0	0.0156045	0	0	0	0	0	0.0162815	0.0187455	0.0157501	0.0140686	0.016947	0	0	0	0.0164668	0.0175134	0.0133646	0	0	0.0151477	0.0136637	0.0152677	0.0212493	0	0.0159326	0.0175981	0.0575872	0.0176572	0	0.0201447
0.0161592	0.0171537	0.0154325	0.0153542	0.0159536	0.0149788	0.0157207	0.0164098	0.017625	0.029881	0.0170144	0.0176641	0	0.0234314	0.0168311	0.0154934	0.0155801	0.0319515	0.0195237	0	0.0155167	0	0	0	0	0	0.0167379	0.0152888	0.0164937	0.0133809	0.0170442	0	0	0	0.0165032	0.0352296	0.013433	0	0	0.0121048	0.0196116	0.0133831	0.0131231	0	0.0167639	0.017139	0.015387	0.0255686	0	0.0195237
0.0179756	0.0196247	0.017131	0.0211206	0.0179011	0.0181155	0.0167422	0.0162076	0.0230417	0.0178165	0.0185536	0.0214071	0	0.0139333	0.0171751	0.0169562	0.0164292	0.0183541	0.0173428	0	0.0170631	0	0	0	0	0	0.0169352	0.0182675	0.0170105	0.0142286	0.0174799	0	0	0	0.0183239	0.0274855	0.0132618	0	0	0.014175	0.0204747	0.017685	0.0185685	0	0.0200517	0.0196401	0.0168428	0.0178137	0	0.0398295
0	0	0	0	0	0	0	0	0	0	0	0	0	0	0	0	0	0	0	0	0	0	0	0	0	0	0	0	0	0	0	0	0	0	0	0	0	0	0	0	0	0	0	0	0	0	0	0	0	0
0.0211656	0.0219666	0.0206707	0.0183939	0.0217077	0.0189742	0.0258581	0.0218892	0.0214851	0.0203602	0.0208391	0.0200696	0	0.0202976	0.0219661	0.021775	0.02003	0.0202011	0.0185381	0	0.0186018	0	0	0	0	0	0.0367793	0.0204165	0.0200301	0.0308803	0.0201178	0	0	0	0.020723	0.0233495	0.03322	0	0	0.0140847	0.0152606	0.0210795	0.0200831	0	0.0195639	0.0206221	0.0194412	0.0148203	0	0.0175005
0.0184972	0.0195648	0.018555	0.0180404	0.0190916	0.0217845	0.0175624	0.0196164	0.0204632	0.0180812	0.0210346	0.0199501	0	0.0245189	0.0186572	0.0185962	0.0183156	0.0193175	0.0186225	0	0.0185862	0	0	0	0	0	0.0189491	0.018174	0.0180616	0.0190157	0.0187923	0	0	0	0.0203523	0.0247165	0.0174788	0	0	0.0160576	0.0229265	0.0200132	0.0219426	0	0.0272064	0.0217872	0.0198158	0.0187167	0	0.0186515
0.0192206	0.0269172	0.0183661	0.0168887	0.0174867	0.016842	0.0161112	0.0172921	0.0254702	0.0168696	0.0177233	0.0197136	0	0.0147015	0.0159852	0.0166392	0.0163698	0.0171953	0.0162455	0	0.0170108	0	0	0	0	0	0.0264554	0.020474	0.0176587	0.0250469	0.017216	0	0	0	0.0167336	0.027168	0.0194203	0	0	0.0125892	0.017059	0.0168761	0.0149811	0	0.017208	0.0191728	0.0173028	0.0155269	0	0.0213461
0.0157518	0.0171674	0.0162678	0.0170516	0.0169683	0.0171341	0.016413	0.0167372	0.0149752	0.0158215	0.0136392	0.0157381	0	0.0112695	0.0140801	0.0153824	0.013367	0.0160266	0.0150012	0	0.0196538	0	0	0	0	0	0.0176564	0.0143162	0.0207139	0.0112503	0.0181247	0	0	0	0.0199036	0.0149112	0.0108396	0	0	0.0116219	0.0126181	0.0178195	0.0123231	0	0.0154019	0.0154595	0.0113871	0.0455999	0	0.0276166
0.0178693	0.0180177	0.0184864	0.0165615	0.0175308	0.0171827	0.0176178	0.0210685	0.0177603	0.0169834	0.01845	0.0194905	0	0.0138262	0.0188783	0.016396	0.0162402	0.0192986	0.0175968	0	0.0238261	0	0	0	0	0	0.0165531	0.0148432	0.0171802	0.0293536	0.0186586	0	0	0	0.0237866	0.0187818	0.0136309	0	0	0.0125286	0.0140372	0.0193045	0.0235959	0	0.01868	0.0184779	0.0149237	0.0131887	0	0.0194094
0	0	0	0	0	0	0	0	0	0	0	0	0	0	0	0	0	0	0	0	0	0	0	0	0	0	0	0	0	0	0	0	0	0	0	0	0	0	0	0	0	0	0	0	0	0	0	0	0	0
0.0170446	0.0178819	0.0178634	0.0165102	0.0269851	0.0176952	0.0150951	0.0202456	0.0194052	0.0251545	0.0177432	0.0212173	0	0.0298711	0.0178206	0.0173267	0.0153924	0.0171698	0.0168714	0	0.0181969	0	0	0	0	0	0.018902	0.0174096	0.0182103	0.0198774	0.0164627	0	0	0	0.0175829	0.0205474	0.0140895	0	0	0.0118898	0.0167646	0.0172228	0.0186017	0	0.0180153	0.0172571	0.020854	0.0168074	0	0.0219328
0	0	0	0	0	0	0	0	0	0	0	0	0	0	0	0	0	0	0	0	0	0	0	0	0	0	0	0	0	0	0	0	0	0	0	0	0	0	0	0	0	0	0	0	0	0	0	0	0	0
0	0	0	0	0	0	0	0	0	0	0	0	0	0	0	0	0	0	0	0	0	0	0	0	0	0	0	0	0	0	0	0	0	0	0	0	0	0	0	0	0	0	0	0	0	0	0	0	0	0
0	0	0	0	0	0	0	0	0	0	0	0	0	0	0	0	0	0	0	0	0	0	0	0	0	0	0	0	0	0	0	0	0	0	0	0	0	0	0	0	0	0	0	0	0	0	0	0	0	0
0.0208793	0.0228982	0.0191474	0.0201247	0.0225812	0.0195479	0.0198033	0.0189334	0.0221403	0.0228789	0.0216191	0.0267188	0	0.0147016	0.0195467	0.0212507	0.0209106	0.0226278	0.0215067	0	0.0214624	0	0	0	0	0	0.0205941	0.0221546	0.0196299	0.0414233	0.0225914	0	0	0	0.0198569	0.0235782	0.0370341	0	0	0.0237733	0.0201528	0.0212363	0.0204321	0	0.0223869	0.0229336	0.0192082	0.0168949	0	0.0170027
0	0	0	0	0	0	0	0	0	0	0	0	0	0	0	0	0	0	0	0	0	0	0	0	0	0	0	0	0	0	0	0	0	0	0	0	0	0	0	0	0	0	0	0	0	0	0	0	0	0
0	0	0	0	0	0	0	0	0	0	0	0	0	0	0	0	0	0	0	0	0	0	0	0	0	0	0	0	0	0	0	0	0	0	0	0	0	0	0	0	0	0	0	0	0	0	0	0	0	0
0	0	0	0	0	0	0	0	0	0	0	0	0	0	0	0	0	0	0	0	0	0	0	0	0	0	0	0	0	0	0	0	0	0	0	0	0	0	0	0	0	0	0	0	0	0	0	0	0	0
0	0	0	0	0	0	0	0	0	0	0	0	0	0	0	0	0	0	0	0	0	0	0	0	0	0	0	0	0	0	0	0	0	0	0	0	0	0	0	0	0	0	0	0	0	0	0	0	0	0
0.0256802	0.0260513	0.0266432	0.0258877	0.0297177	0.0291179	0.0186563	0.0358916	0.0356148	0.0218809	0.0299393	0.0260001	0	0.0951051	0.0249255	0.0272662	0.0215875	0.0252046	0.0238095	0	0.024537	0	0	0	0	0	0.0337029	0.0190923	0.0207443	0.0203275	0.0227942	0	0	0	0.0302046	0.0391657	0.0239095	0	0	0.0153128	0.0165861	0.0266847	0.0416778	0	0.0305283	0.0284909	0.0472664	0.0159301	0	0.0326822
0.0213255	0.02376	0.0224863	0.01968	0.0231229	0.019182	0.0209769	0.018412	0.021578	0.0226005	0.0204089	0.0202076	0	0.0164206	0.0195694	0.020043	0.0197977	0.0206712	0.0198209	0	0.0203738	0	0	0	0	0	0.0203236	0.0250235	0.0201885	0.0166933	0.0194826	0	0	0	0.0217498	0.0242547	0.0156752	0	0	0.0304757	0.020748	0.0204833	0.0196222	0	0.0187712	0.0211662	0.0175887	0.0190026	0	0.0195748
0.0214096	0.0151291	0.0152477	0.0148024	0.014746	0.0292799	0.0147752	0.0160064	0.0155053	0.0141955	0.0146532	0.0146371	0	0.0220742	0.0335379	0.0226216	0.0143317	0.0153476	0.0245135	0	0.014075	0	0	0	0	0	0.0143756	0.0147436	0.0147897	0.0131123	0.0238134	0	0	0	0.0150599	0.016108	0.0158153	0	0	0.0132102	0.0128362	0.0162239	0.0169674	0	0.024211	0.0152143	0.0150463	0.0121478	0	0.0153301
0	0	0	0	0	0	0	0	0	0	0	0	0	0	0	0	0	0	0	0	0	0	0	0	0	0	0	0	0	0	0	0	0	0	0	0	0	0	0	0	0	0	0	0	0	0	0	0	0	0
0.0209817	0.0198754	0.0184373	0.0174525	0.0180625	0.0228491	0.0185714	0.019601	0.0197489	0.0185428	0.0191983	0.0217219	0	0.0171113	0.0247298	0.0210413	0.0186631	0.0188056	0.0215564	0	0.0182432	0	0	0	0	0	0.0181685	0.0204346	0.0179273	0.0166329	0.0219264	0	0	0	0.016549	0.0194092	0.0196184	0	0	0.0131777	0.0177748	0.0247781	0.0193165	0	0.0214922	0.0187528	0.016845	0.0175806	0	0.0177137
0	0	0	0	0	0	0	0	0	0	0	0	0	0	0	0	0	0	0	0	0	0	0	0	0	0	0	0	0	0	0	0	0	0	0	0	0	0	0	0	0	0	0	0	0	0	0	0	0	0
0.0132441	0.0139727	0.0135442	0.0128894	0.0131048	0.0138444	0.0130836	0.0125121	0.0147018	0.0128538	0.013914	0.0145405	0	0.0133379	0.0124925	0.0137941	0.0790243	0.0129844	0.0134589	0	0.012481	0	0	0	0	0	0.0145009	0.0131159	0.013148	0.0133278	0.0127837	0	0	0	0.0124295	0.0159929	0.0127437	0	0	0.0109844	0.0130029	0.0145572	0.0123514	0	0.0140695	0.0134058	0.013276	0.0118148	0	0.0244725
0.0291226	0.0277086	0.0311171	0.021917	0.0194775	0.0205049	0.0203965	0.0178153	0.0188139	0.0190342	0.0188788	0.0185732	0	0.0181925	0.0200929	0.0293143	0.0180329	0.0192643	0.019165	0	0.019131	0	0	0	0	0	0.0175107	0.0204937	0.0202944	0.0142945	0.0200009	0	0	0	0.0191273	0.0189423	0.0134763	0	0	0.023853	0.0189427	0.0199979	0.017855	0	0.018751	0.028588	0.0173069	0.0216487	0	0.0231553
0.0167727	0.0173953	0.0162153	0.0168854	0.0163627	0.0154745	0.0167699	0.0151659	0.0169396	0.0165785	0.0176571	0.0188494	0	0.0163627	0.0170902	0.0165553	0.0155491	0.0167762	0.0169792	0	0.0163483	0	0	0	0	0	0.0154577	0.0187868	0.0168373	0.0128231	0.0171951	0	0	0	0.0155234	0.0166904	0.0138686	0	0	0.0178531	0.0153554	0.018662	0.0168015	0	0.0175269	0.0238352	0.0147972	0.0193086	0	0.0157486
0.0132933	0.0144846	0.0128345	0.0157132	0.0145519	0.0130519	0.0121147	0.0131928	0.0134531	0.0143064	0.0162846	0.101251	0	0.0115815	0.0153536	0.0137303	0.0245123	0.0147528	0.0147439	0	0.0121431	0	0	0	0	0	0.0137516	0.0177005	0.0123506	0.0123353	0.0127572	0	0	0	0.012607	0.0154984	0.0118648	0	0	0.0109388	0.0153198	0.0124388	0.0119404	0	0.0131534	0.0137003	0.0139655	0.0129037	0	0.012242
0.0202272	0.0214407	0.0197399	0.0193002	0.0209392	0.0203923	0.0181428	0.0216228	0.0246198	0.019301	0.0218622	0.0204548	0	0.0404808	0.0193372	0.026337	0.0180972	0.0202518	0.0189431	0	0.0200114	0	0	0	0	0	0.021796	0.0202888	0.0182024	0.0172963	0.0195449	0	0	0	0.0221914	0.0251665	0.0160375	0	0	0.0265511	0.0149722	0.0199824	0.0366392	0	0.0215505	0.0220245	0.025677	0.015903	0	0.0242658
0	0	0	0	0	0	0	0	0	0	0	0	0	0	0	0	0	0	0	0	0	0	0	0	0	0	0	0	0	0	0	0	0	0	0	0	0	0	0	0	0	0	0	0	0	0	0	0	0	0
0.0216194	0.0247724	0.0214964	0.0196177	0.0227404	0.0200325	0.0186948	0.0187953	0.0204953	0.0212356	0.0195779	0.0222647	0	0.0166327	0.0194552	0.021952	0.0187115	0.0196486	0.0195852	0	0.020642	0	0	0	0	0	0.0188126	0.0202188	0.0221384	0.0233947	0.0209599	0	0	0	0.019661	0.0233161	0.0203123	0	0	0.0157299	0.0199961	0.025639	0.0185022	0	0.0203384	0.0233927	0.0196025	0.0181798	0	0.0202679
0.0184852	0.0188172	0.018004	0.018388	0.0190962	0.0180889	0.0179448	0.0197529	0.01929	0.0324546	0.0198059	0.019395	0	0.0275612	0.0432694	0.0337624	0.0178009	0.0190101	0.0181217	0	0.0178697	0	0	0	0	0	0.0187664	0.0162999	0.017293	0.0304665	0.0186523	0	0	0	0.0177376	0.0205589	0.0281337	0	0	0.0128818	0.0204873	0.0214107	0.0236757	0	0.0190104	0.018941	0.0188982	0.0151739	0	0.018292
0.0223058	0.0250302	0.0202695	0.0199541	0.0219599	0.0203727	0.0193503	0.0189629	0.0272686	0.0223105	0.0225001	0.0252058	0	0.0194028	0.0190161	0.0211615	0.0182385	0.0209437	0.0209561	0	0.0188553	0	0	0	0	0	0.0223286	0.0275081	0.0190897	0.0193485	0.021323	0	0	0	0.0218204	0.0335415	0.0178396	0	0	0.0157587	0.0219266	0.0200318	0.0200849	0	0.0203174	0.0233384	0.0234927	0.019042	0	0.0337652
0.0202014	0.0209631	0.0194144	0.0188358	0.023819	0.0193468	0.0202692	0.0179761	0.022456	0.0173106	0.0175487	0.0201401	0	0.017352	0.017322	0.0213098	0.0180549	0.0177645	0.0174271	0	0.0194878	0	0	0	0	0	0.0189807	0.0179848	0.0179932	0.0153433	0.017836	0	0	0	0.0183207	0.0219053	0.0146677	0	0	0.0190896	0.0198454	0.0203561	0.0145842	0	0.017059	0.018807	0.0159459	0.0174948	0	0.0201194
0	0	0	0	0	0	0	0	0	0	0	0	0	0	0	0	0	0	0	0	0	0	0	0	0	0	0	0	0	0	0	0	0	0	0	0	0	0	0	0	0	0	0	0	0	0	0	0	0	0
0	0	0	0	0	0	0	0	0	0	0	0	0	0	0	0	0	0	0	0	0	0	0	0	0	0	0	0	0	0	0	0	0	0	0	0	0	0	0	0	0	0	0	0	0	0	0	0	0	0
0.0223782	0.025632	0.0230673	0.0204093	0.0229835	0.0200972	0.0197734	0.0186431	0.0231185	0.0221334	0.0205027	0.0231794	0	0.0171911	0.0221396	0.0211902	0.0195925	0.0236141	0.0215423	0	0.0241613	0	0	0	0	0	0.0193229	0.021303	0.0198878	0.017869	0.0235866	0	0	0	0.0309757	0.0258702	0.0159691	0	0	0.0168568	0.0212414	0.023369	0.0184566	0	0.0206285	0.0222752	0.0174688	0.0196745	0	0.0195276
0	0	0	0	0	0	0	0	0	0	0	0	0	0	0	0	0	0	0	0	0	0	0	0	0	0	0	0	0	0	0	0	0	0	0	0	0	0	0	0	0	0	0	0	0	0	0	0	0	0
0.0233945	0.0238979	0.023117	0.0193054	0.0240091	0.0203101	0.02189	0.0189781	0.0224459	0.0208288	0.0192403	0.0210549	0	0.0175526	0.0219067	0.022135	0.0196298	0.021853	0.0203805	0	0.0216228	0	0	0	0	0	0.0192604	0.0221797	0.0191966	0.0174544	0.0210929	0	0	0	0.0197133	0.0208482	0.0159826	0	0	0.0182596	0.0197547	0.0219024	0.0209158	0	0.0196319	0.0210888	0.017385	0.0190543	0	0.0189472
0.0144128	0.0150354	0.0145066	0.0138399	0.0142322	0.014228	0.0149352	0.0130633	0.0150268	0.0139255	0.0145025	0.0147355	0	0.0127478	0.014376	0.0143104	0.014475	0.0150792	0.0148949	0	0.0145764	0	0	0	0	0	0.0142832	0.0166607	0.0140829	0.0127259	0.0148597	0	0	0	0.014042	0.0154627	0.0159017	0	0	0.0159622	0.0129611	0.0136858	0.0127667	0	0.0238959	0.0219906	0.013689	0.0133735	0	0.0162429
0.0198901	0.0252377	0.0200792	0.0188226	0.0208241	0.0199128	0.0185189	0.0182768	0.0214923	0.0201722	0.0189182	0.0216668	0	0.0162086	0.0192494	0.0213136	0.0195625	0.0207699	0.0213061	0	0.0198413	0	0	0	0	0	0.0188042	0.0230217	0.0196277	0.0165875	0.0213005	0	0	0	0.0231818	0.0242069	0.0156688	0	0	0.032252	0.0207621	0.0215335	0.0180007	0	0.0201506	0.0217534	0.0172892	0.0213855	0	0.0198202
0	0	0	0	0	0	0	0	0	0	0	0	0	0	0	0	0	0	0	0	0	0	0	0	0	0	0	0	0	0	0	0	0	0	0	0	0	0	0	0	0	0	0	0	0	0	0	0	0	0
0.0219366	0.0279021	0.0217057	0.0198609	0.0217792	0.0191819	0.0191434	0.0187266	0.0236538	0.0222706	0.0200022	0.0221023	0	0.0179202	0.0200568	0.0205004	0.0190446	0.0214398	0.0197746	0	0.0219105	0	0	0	0	0	0.0198696	0.0243189	0.0232103	0.0184142	0.0223777	0	0	0	0.0200802	0.0254876	0.0163235	0	0	0.0172513	0.0204465	0.0215362	0.0197319	0	0.0212066	0.0224009	0.0185755	0.0198031	0	0.0205515
0	0	0	0	0	0	0	0	0	0	0	0	0	0	0	0	0	0	0	0	0	0	0	0	0	0	0	0	0	0	0	0	0	0	0	0	0	0	0	0	0	0	0	0	0	0	0	0	0	0
0.0203335	0.0290601	0.0226679	0.0195044	0.0201376	0.0192481	0.0189958	0.0182726	0.0226805	0.0267818	0.0200091	0.0272482	0	0.0141343	0.0204182	0.0197256	0.0248175	0.0230266	0.0230225	0	0.0193704	0	0	0	0	0	0.0194056	0.0231553	0.0201096	0.0174403	0.0243107	0	0	0	0.0214913	0.0394481	0.0145882	0	0	0.014239	0.0283329	0.0226578	0.0209488	0	0.0194273	0.0220485	0.0174806	0.0222571	0	0.0220057
0.0200614	0.0227337	0.0189843	0.019496	0.0206309	0.0191238	0.0196337	0.0191166	0.0395855	0.0205256	0.0212482	0.0299178	0	0.0150301	0.0195723	0.020575	0.0195502	0.0218951	0.0309025	0	0.0206025	0	0	0	0	0	0.0210419	0.0262888	0.0209667	0.0181019	0.0219863	0	0	0	0.0223473	0.0364311	0.0146028	0	0	0.0135019	0.0199923	0.0216308	0.0194833	0	0.019692	0.0217936	0.0210471	0.0186421	0	0.0228967
0.0207875	0.0241504	0.0213398	0.0197258	0.0210635	0.0210465	0.0196338	0.020489	0.0273846	0.0196296	0.0220385	0.022289	0	0.0227516	0.0189206	0.021916	0.0203701	0.0208189	0.0203583	0	0.0186213	0	0	0	0	0	0.0244774	0.0214469	0.0189458	0.0244947	0.0197396	0	0	0	0.0199484	0.0341605	0.021986	0	0	0.0154601	0.022109	0.0200287	0.0201211	0	0.021611	0.0219234	0.0206345	0.0185403	0	0.0378244
0	0	0	0	0	0	0	0	0	0	0	0	0	0	0	0	0	0	0	0	0	0	0	0	0	0	0	0	0	0	0	0	0	0	0	0	0	0	0	0	0	0	0	0	0	0	0	0	0	0
0.023792	0.0291303	0.0238376	0.0215343	0.0246997	0.0224462	0.0231086	0.0249357	0.0276076	0.0239757	0.0228579	0.0261571	0	0.0193314	0.0250438	0.0256107	0.0272771	0.0259165	0.0242865	0	0.024533	0	0	0	0	0	0.0225522	0.0222693	0.0210779	0.0195806	0.0258296	0	0	0	0.0318916	0.0322751	0.0174068	0	0	0.0168266	0.0236271	0.0325073	0.020115	0	0.0224763	0.0254241	0.0190115	0.020567	0	0.0210166
0.0202239	0.0250802	0.0207013	0.0198998	0.0216813	0.0185836	0.0186082	0.0189347	0.026179	0.020712	0.0195516	0.0228551	0	0.0172842	0.0208708	0.0203423	0.0190244	0.0225544	0.0226674	0	0.0227044	0	0	0	0	0	0.0211846	0.0220401	0.0208501	0.0183427	0.023502	0	0	0	0.0216069	0.0259705	0.0168507	0	0	0.0162566	0.0543353	0.0247511	0.0197229	0	0.0198162	0.0219944	0.0177875	0.0196401	0	0.0196321
0.0228148	0.0254137	0.0212446	0.0213503	0.0220898	0.0214696	0.0203779	0.0219855	0.0251101	0.0219484	0.0229801	0.0244502	0	0.0207696	0.0227815	0.0243399	0.0199713	0.0228972	0.0220789	0	0.0234199	0	0	0	0	0	0.0218294	0.0238611	0.0221408	0.0191232	0.0229943	0	0	0	0.0237496	0.0270268	0.0173435	0	0	0.017399	0.0199654	0.0268722	0.0198018	0	0.0212332	0.0233988	0.0206198	0.0181788	0	0.0271825
0	0	0	0	0	0	0	0	0	0	0	0	0	0	0	0	0	0	0	0	0	0	0	0	0	0	0	0	0	0	0	0	0	0	0	0	0	0	0	0	0	0	0	0	0	0	0	0	0	0
0.0195988	0.022575	0.0197998	0.0203318	0.020984	0.0182323	0.0182845	0.0188681	0.0229156	0.0234793	0.0216396	0.0209381	0	0.01832	0.018865	0.0196854	0.0187606	0.0209799	0.0196716	0	0.0214417	0	0	0	0	0	0.0194555	0.0196305	0.0203748	0.0184024	0.0208993	0	0	0	0.0200139	0.0266754	0.0168381	0	0	0.0170426	0.0207231	0.0208625	0.0194971	0	0.0186661	0.0199903	0.0181809	0.0202005	0	0.0195556
0	0	0	0	0	0	0	0	0	0	0	0	0	0	0	0	0	0	0	0	0	0	0	0	0	0	0	0	0	0	0	0	0	0	0	0	0	0	0	0	0	0	0	0	0	0	0	0	0	0
0.0197432	0.0217323	0.0193968	0.0183769	0.022531	0.0187147	0.0187058	0.0187636	0.0228071	0.0210739	0.019401	0.0227292	0	0.0187668	0.0213082	0.0208675	0.0186713	0.020868	0.0192741	0	0.0189309	0	0	0	0	0	0.0248658	0.0206295	0.0196707	0.0228429	0.0214841	0	0	0	0.0202872	0.0236324	0.0220968	0	0	0.0157827	0.0214661	0.020722	0.0215066	0	0.01913	0.0204936	0.0188471	0.0191187	0	0.0197213
0.0181676	0.0174807	0.0162225	0.0156295	0.0165699	0.0195235	0.0161062	0.0164458	0.0236207	0.0163965	0.0161982	0.0162429	0	0.0157705	0.0218177	0.0187835	0.0155975	0.0251313	0.0242407	0	0.0166956	0	0	0	0	0	0.0159944	0.0187524	0.0164135	0.0147234	0.0197487	0	0	0	0.0170282	0.0174068	0.0134678	0	0	0.0147701	0.0146363	0.0185672	0.0162835	0	0.0197013	0.0172231	0.0154808	0.0164403	0	0.015641
0	0	0	0	0	0	0	0	0	0	0	0	0	0	0	0	0	0	0	0	0	0	0	0	0	0	0	0	0	0	0	0	0	0	0	0	0	0	0	0	0	0	0	0	0	0	0	0	0	0
0.0135822	0.014189	0.0135027	0.0120435	0.0135509	0.013447	0.0120006	0.0117577	0.0137029	0.0122517	0.012159	0.0133371	0	0.0119078	0.0149384	0.0128992	0.0125919	0.0134056	0.0130196	0	0.012234	0	0	0	0	0	0.0124397	0.017313	0.0124536	0.0115619	0.0134637	0	0	0	0.0119308	0.0135841	0.0109998	0	0	0.0111528	0.0118037	0.0120512	0.0117938	0	0.0131992	0.0127647	0.0114232	0.0114258	0	0.0120194
0.0211048	0.0227459	0.0193675	0.019178	0.0216226	0.0184768	0.0196052	0.0194269	0.0240462	0.0195815	0.0202344	0.0241633	0	0.0187595	0.01926	0.0203449	0.0184196	0.0212577	0.0191874	0	0.0198518	0	0	0	0	0	0.0192436	0.0194839	0.0183135	0.0226814	0.0200299	0	0	0	0.0201604	0.0293512	0.0204492	0	0	0.0177347	0.020958	0.0199634	0.0196885	0	0.019664	0.0220522	0.0198294	0.019201	0	0.0204836
0.0256308	0.0311772	0.0235001	0.0273813	0.0240447	0.0237412	0.0216263	0.0250255	0.0260541	0.0211764	0.0238652	0.024903	0	0.0201846	0.0216276	0.0210156	0.0205004	0.0222829	0.0215523	0	0.0203752	0	0	0	0	0	0.023277	0.0208299	0.0234523	0.0222313	0.0211851	0	0	0	0.0224098	0.0300071	0.0195733	0	0	0.0161482	0.0207041	0.0204598	0.0327357	0	0.0232661	0.025466	0.0222539	0.0183884	0	0.0217019
0.0213752	0.0246978	0.0200855	0.0199264	0.0210138	0.0196369	0.0191339	0.0184229	0.0211415	0.0330687	0.020531	0.0217104	0	0.0171775	0.019208	0.0208275	0.0184116	0.0228489	0.0202887	0	0.0191451	0	0	0	0	0	0.0200278	0.0199945	0.0189729	0.0202237	0.021591	0	0	0	0.0192928	0.0263336	0.0179876	0	0	0.0178313	0.0209491	0.0204013	0.0177236	0	0.0191845	0.0207965	0.0176548	0.019031	0	0.0200267
0.0229256	0.0247112	0.0204758	0.020341	0.0236734	0.0208035	0.0206097	0.0195312	0.025075	0.0216663	0.0194547	0.0229754	0	0.0171961	0.0196859	0.020529	0.0191497	0.0229531	0.0237416	0	0.0221954	0	0	0	0	0	0.0187846	0.0209686	0.0210398	0.0190042	0.0211019	0	0	0	0.0206547	0.0243405	0.016663	0	0	0.019502	0.0210501	0.0227391	0.0181492	0	0.0213969	0.0214564	0.0181	0.0195037	0	0.0200926
[truncated: 425 more columns]
